# Supplementary material for: Comparative analysis of oligosaccharides in the milk of human and animals by using LC-QE-HF-MS
Source: PubMed Central journal article supplement — Food Chem X. 2023 May 9;18:100705. doi: 10.1016/j.fochx.2023.100705 (PMC10314177; doi:10.1016/j.fochx.2023.100705), 2023-05-09

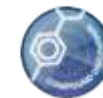

| Structure | Name | RT [min] | Formula | Calc. MW  | Areas |
|-----------|------|----------|---------|-----------|-------|
| n/a       |      | 28.25    | n/a     | 488.17374 |       |

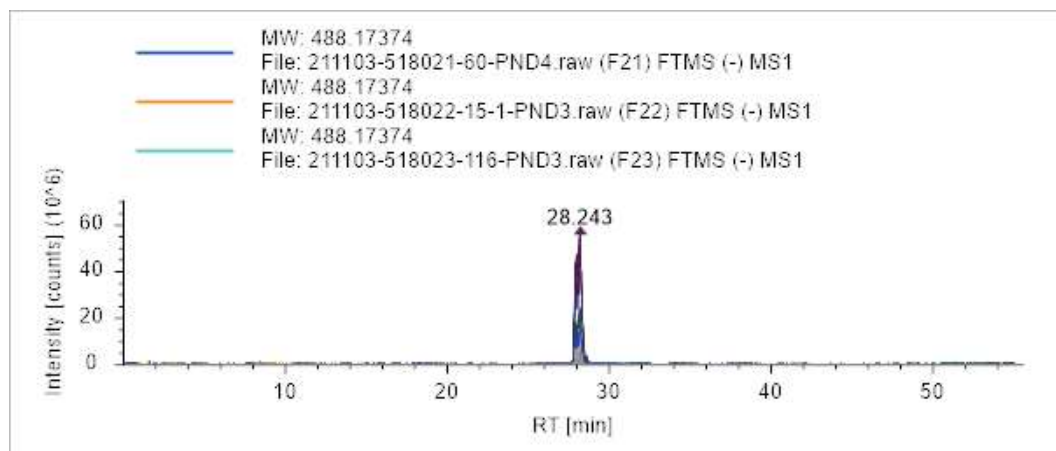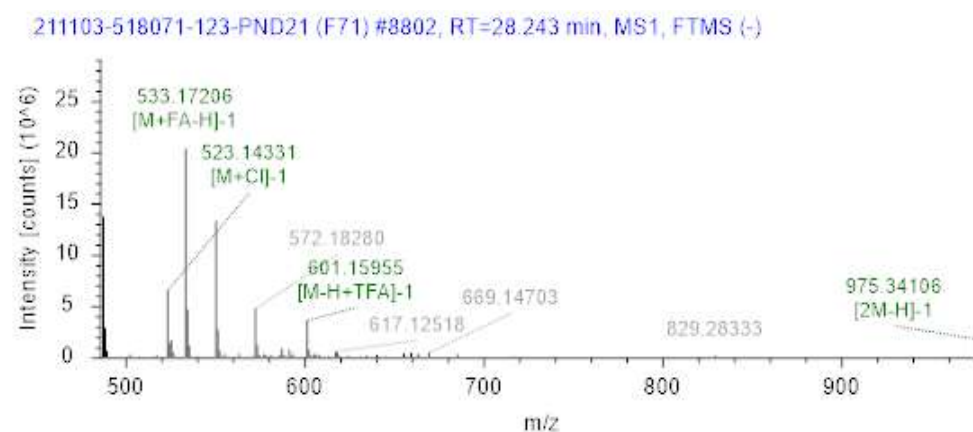

211103-518071-123-PND21 (F71) #8791, RT=28.216 min, MS2, FTMS (-), (HCD, DDA, 487.1666@30, -1)

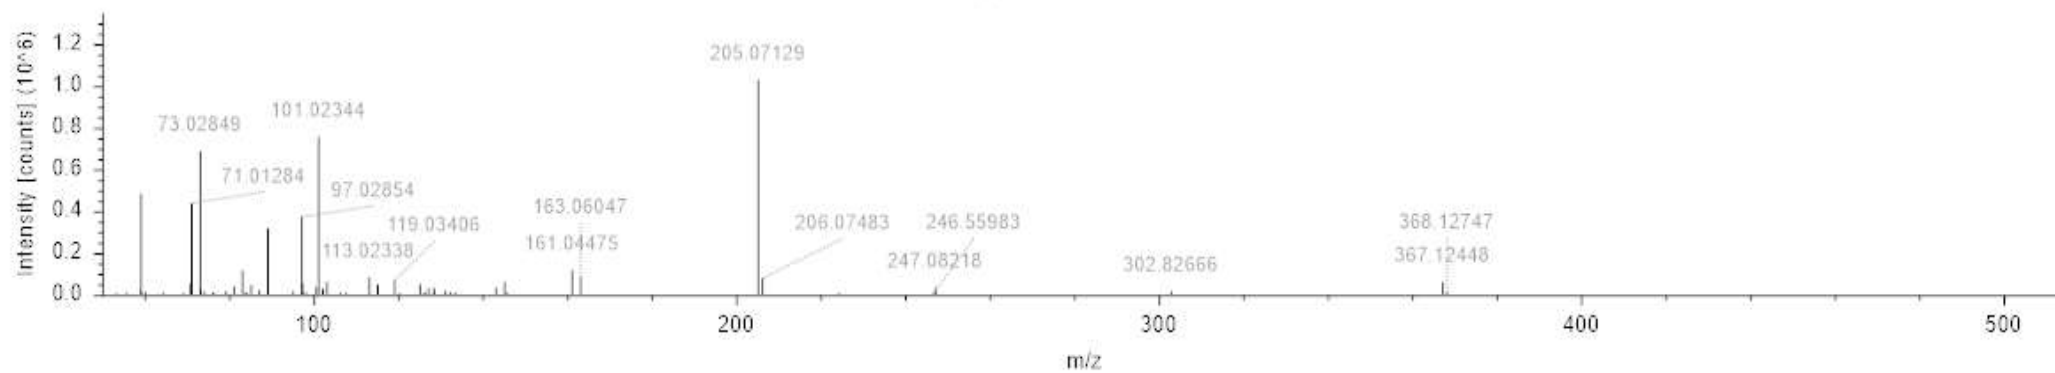



| Structure | Name | RT [min] | Formula | Calc. MW  | Areas |
|-----------|------|----------|---------|-----------|-------|
| n/a       |      | 32.75    | n/a     | 504.16732 |       |

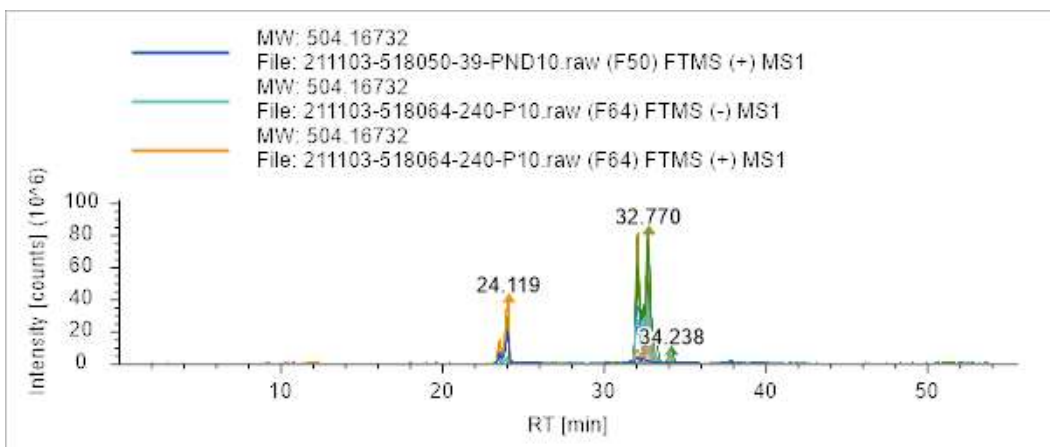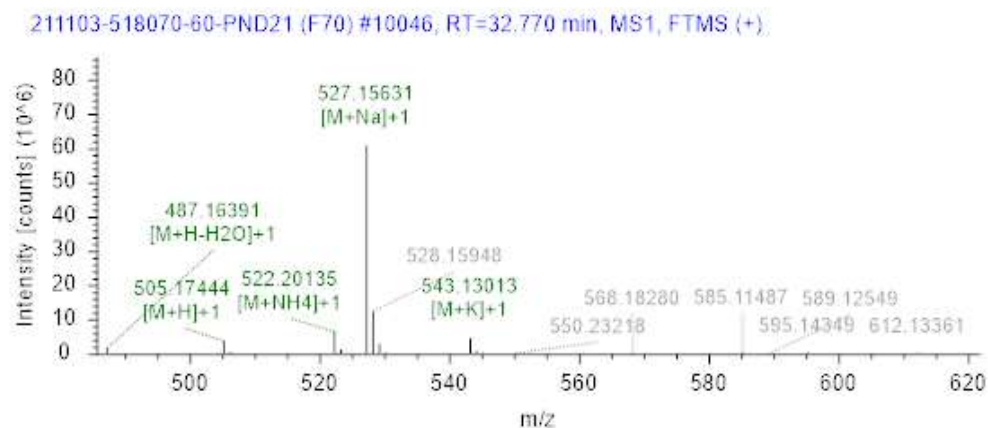

211103-518070-60-PND21 (F70) #10017, RT=32.694 min, MS2, FTMS (-), (HCD, DDA, 503.1607@30, -1)

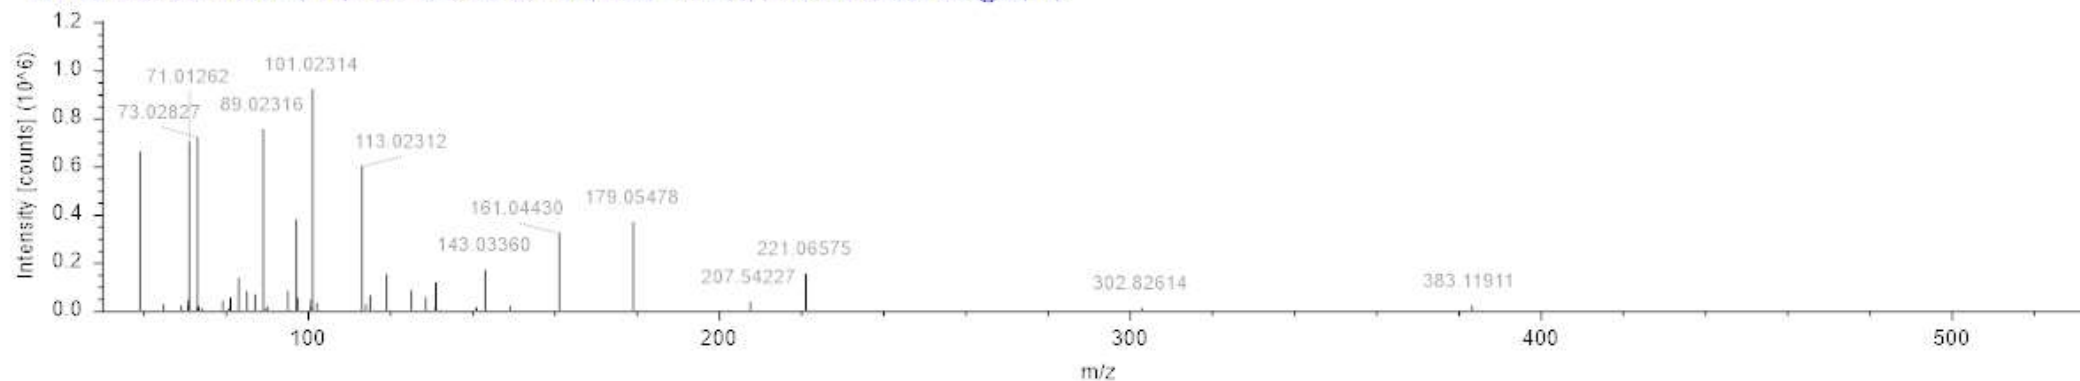



| Structure | Name | RT [min] | Formula | Calc. MW  | Areas |
|-----------|------|----------|---------|-----------|-------|
| n/a       |      | 23.54    | n/a     | 504.16748 |       |

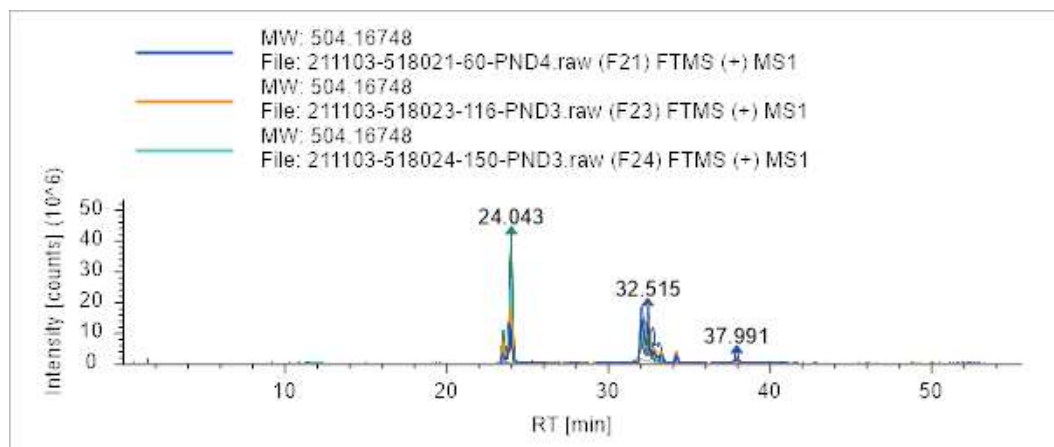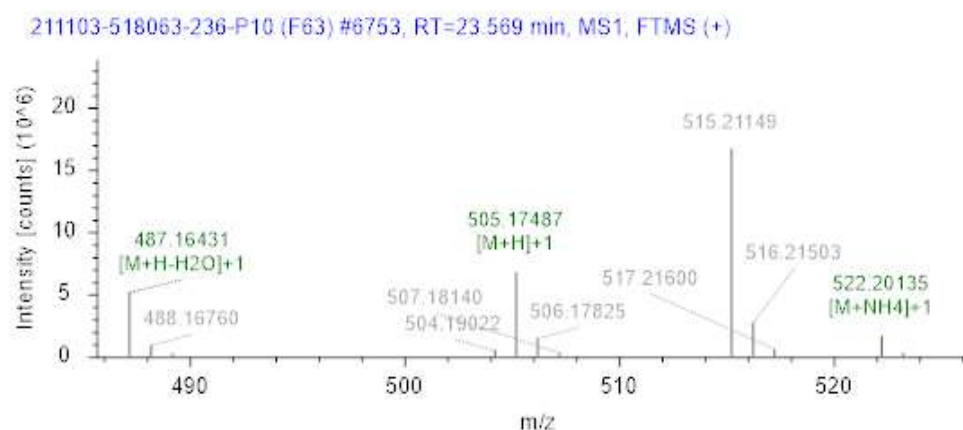

211103-518063-236-P10 (F63) #6766, RT=23.600 min, MS2, FTMS (+), (HCD, DDA, 505.1749@30, +1)

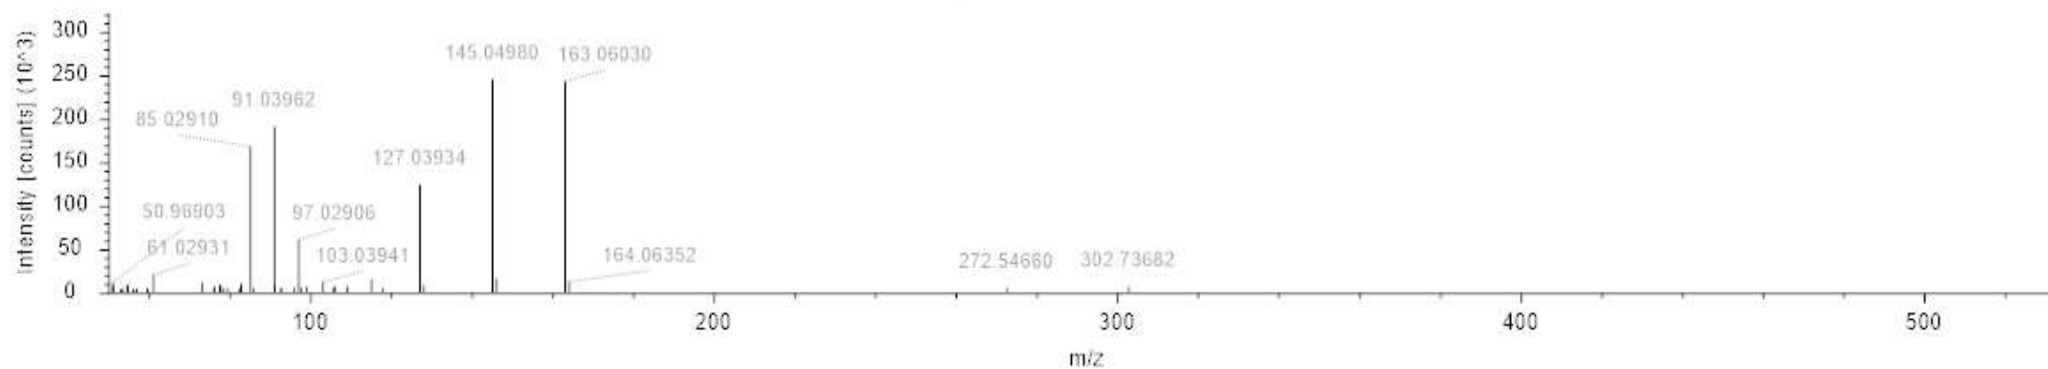



| Structure | Name | RT [min] | Formula | Calc. MW  | Areas |
|-----------|------|----------|---------|-----------|-------|
| n/a       |      | 32.10    | n/a     | 504.16763 |       |

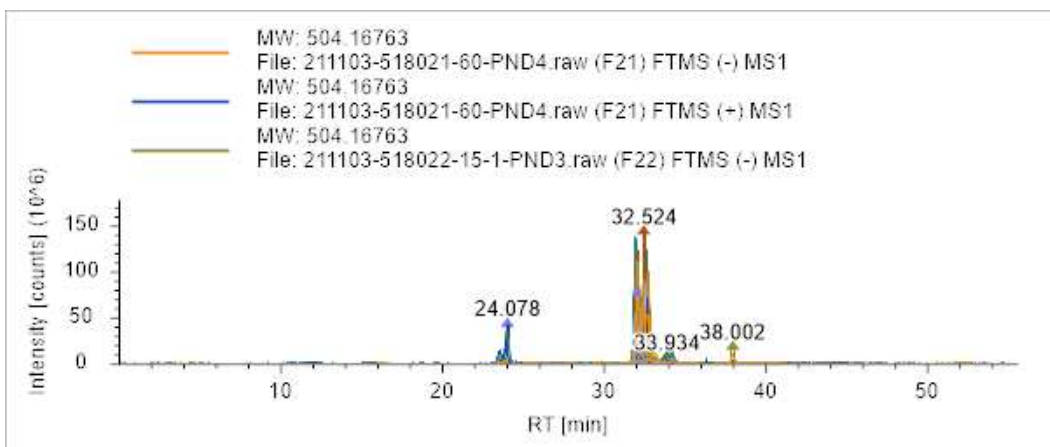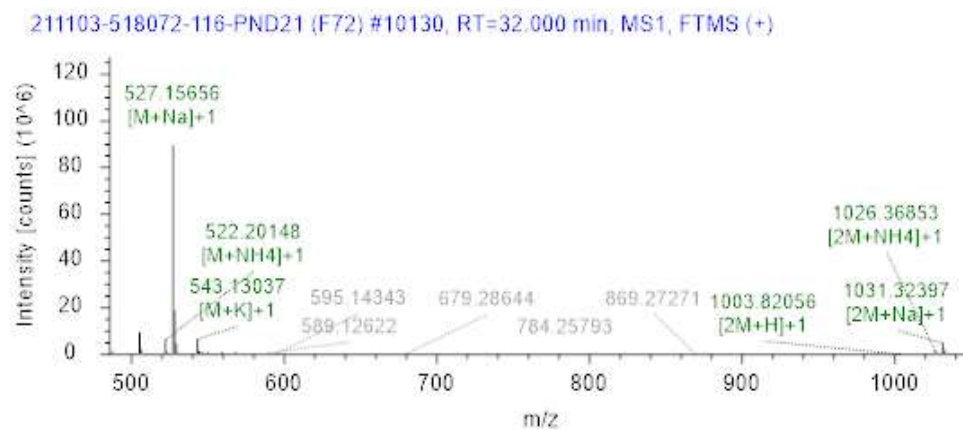

211103-518031-12-PND3 (F31) #9936, RT=32.140 min, MS2, FTMS (-), (HCD, DDA, 503.1607@30, -1)

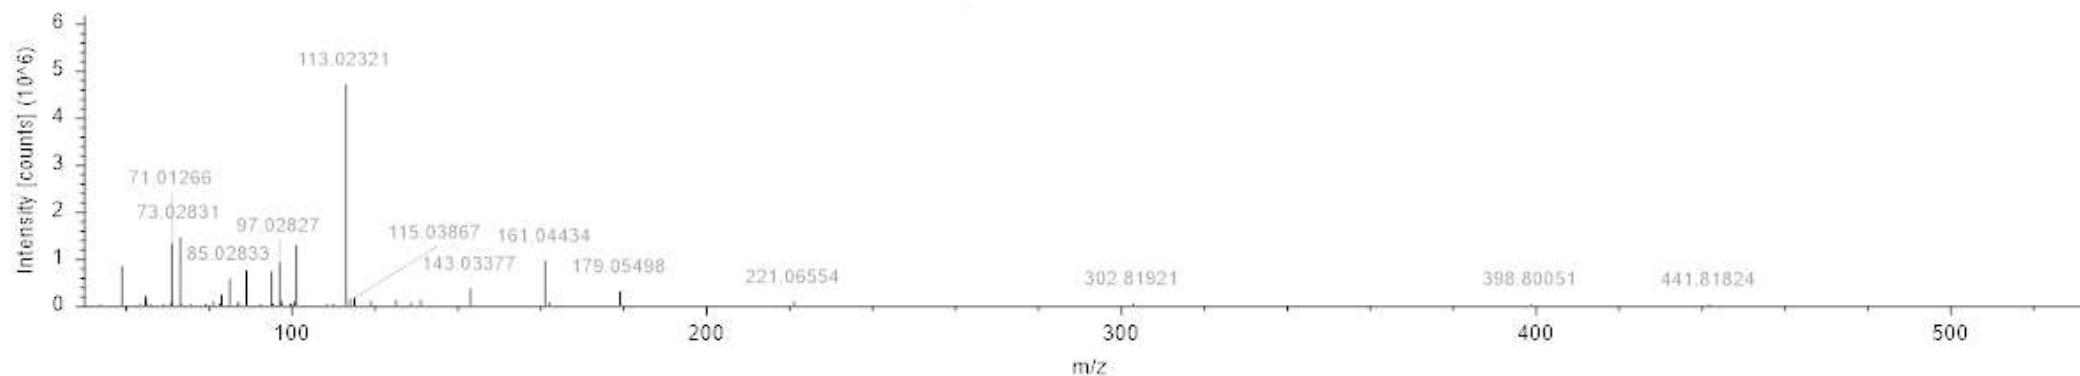



| Structure | Name | RT [min] | Formula | Calc. MW  | Areas |
|-----------|------|----------|---------|-----------|-------|
| n/a       |      | 38.00    | n/a     | 504.16865 |       |

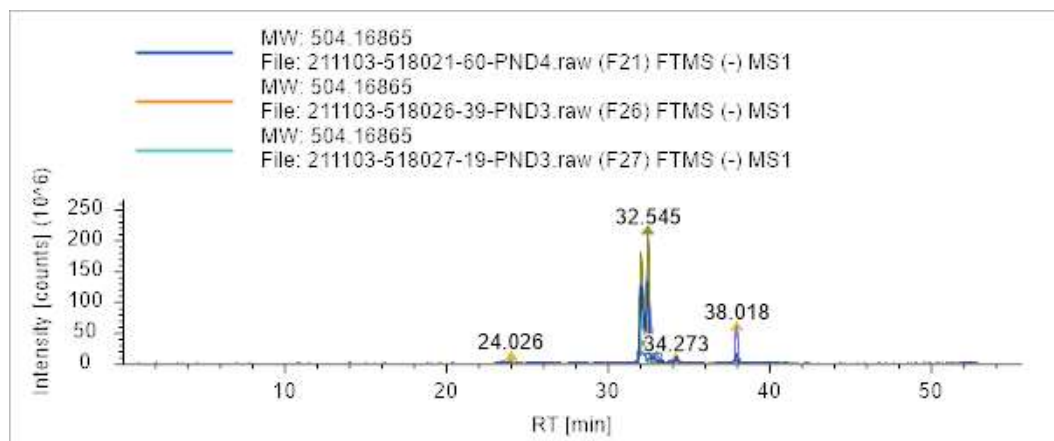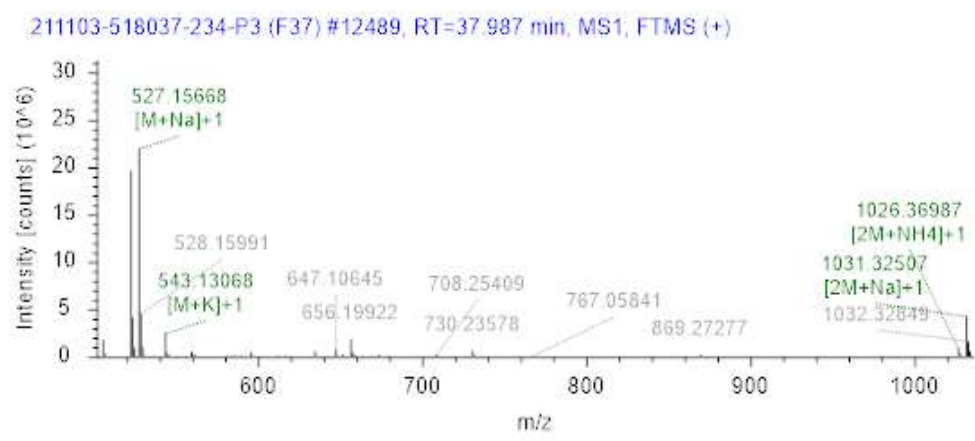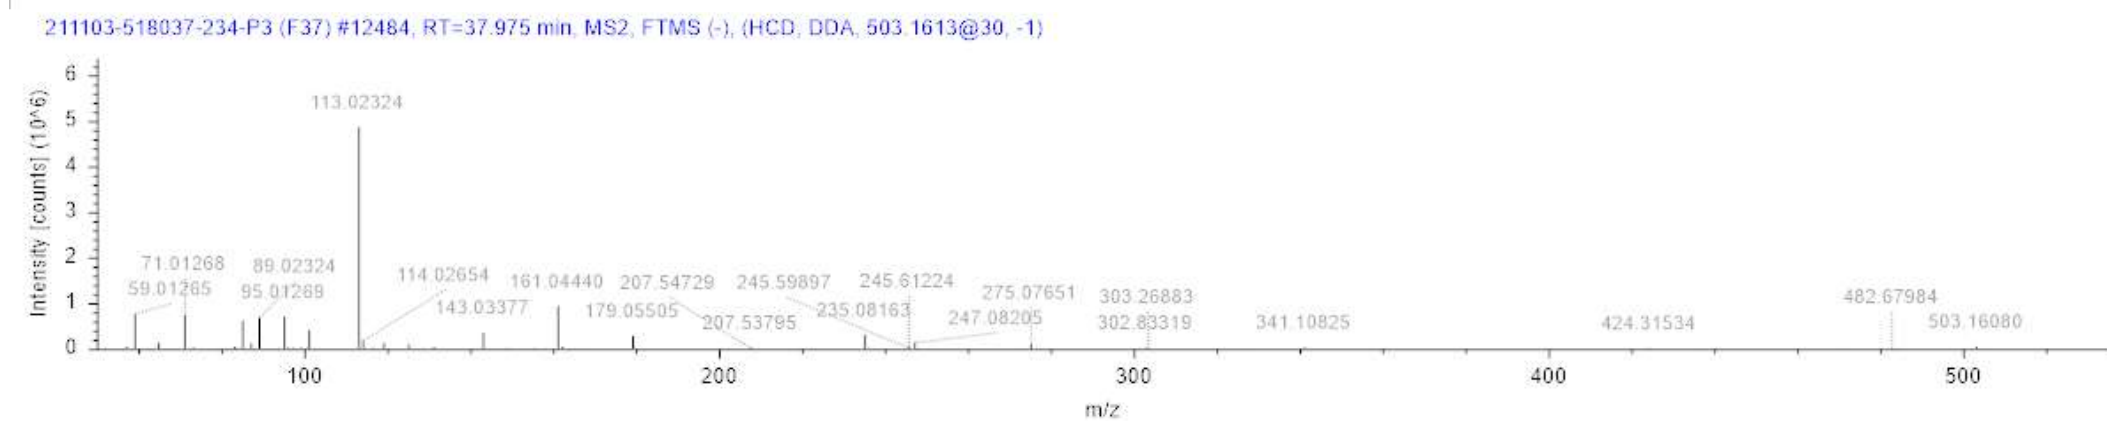



| Structure | Name | RT [min] | Formula | Calc. MW  | Areas |
|-----------|------|----------|---------|-----------|-------|
| n/a       |      | 33.93    | n/a     | 504.17080 |       |

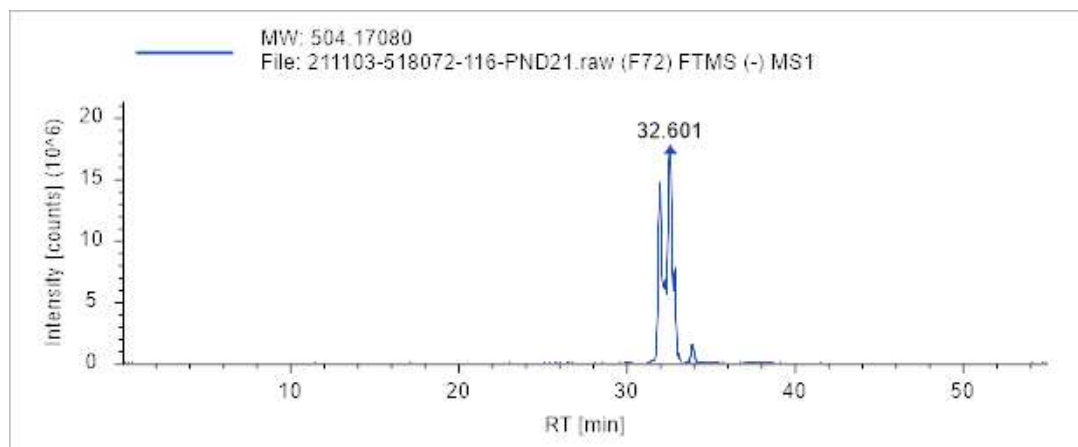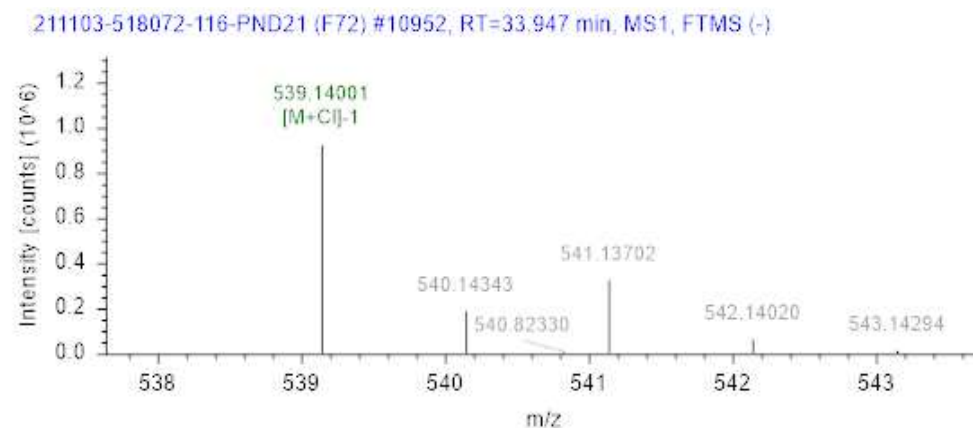

211103-518072-116-PND21 (F72) #10972, RT=34.005 min, MS2, FTMS (-), (HCD, DDA, 539.1400@30, -1)

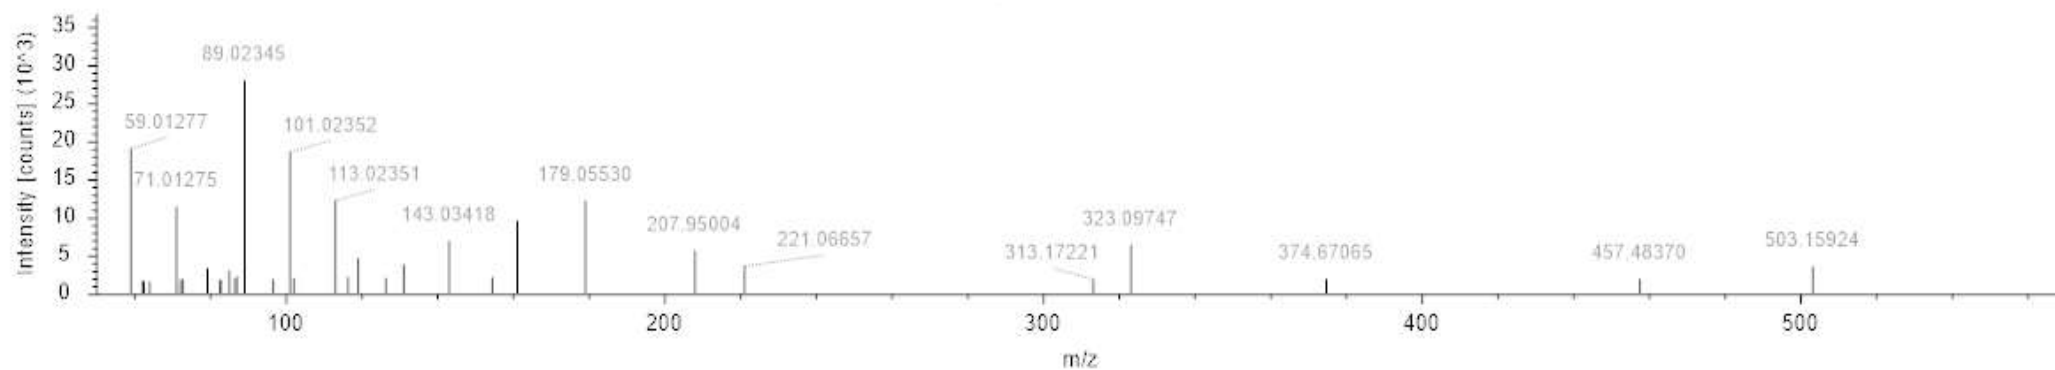





| Structure | Name | RT [min] | Formula | Calc. MW  | Areas |
|-----------|------|----------|---------|-----------|-------|
| n/a       |      | 30.59    | n/a     | 545.19408 |       |

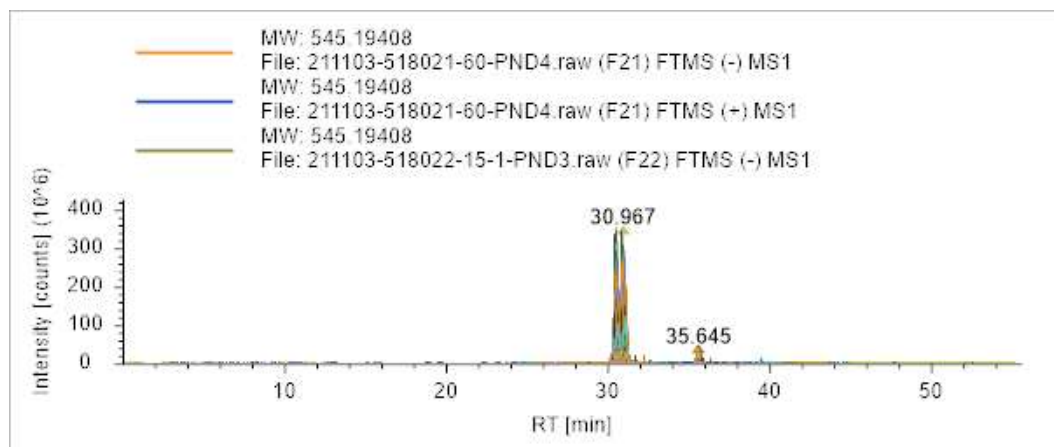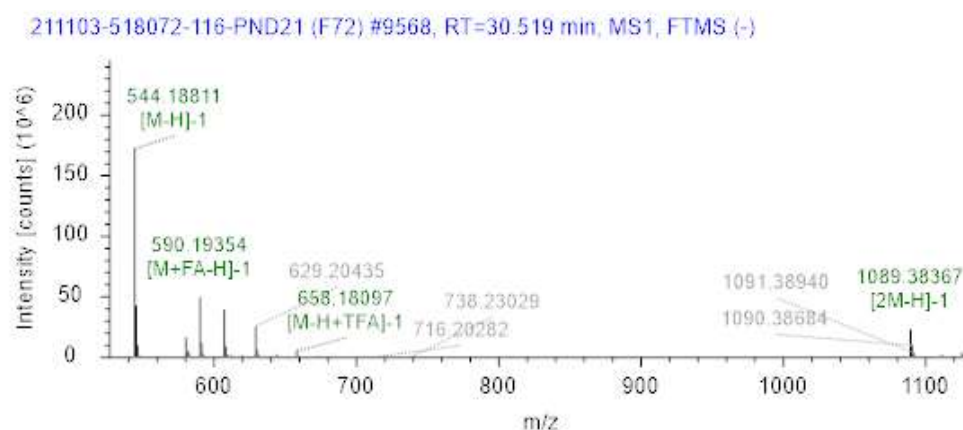

211103-518072-116-PND21 (F72) #9573, RT=30.526 min, MS2, FTMS (-), (HCD, DDA, 543.1929@30, -1)

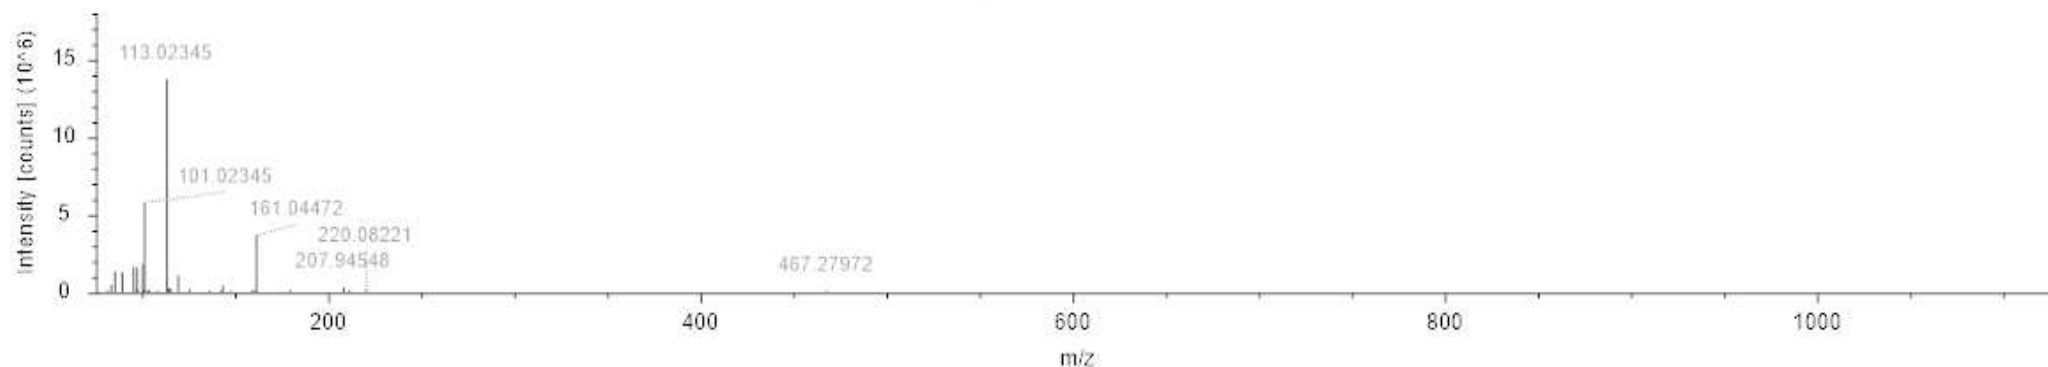



| Structure | Name | RT [min] | Formula | Calc. MW  | Areas |
|-----------|------|----------|---------|-----------|-------|
| n/a       |      | 35.67    | n/a     | 545.19478 |       |

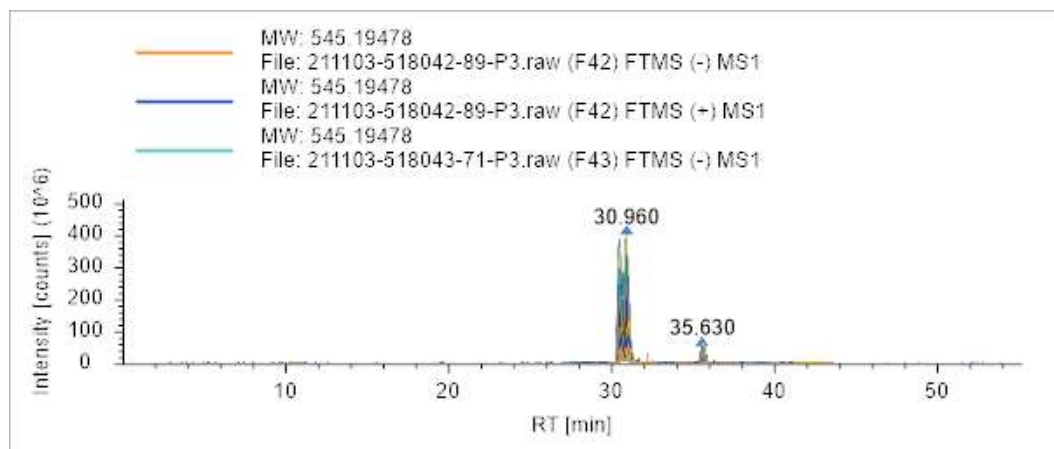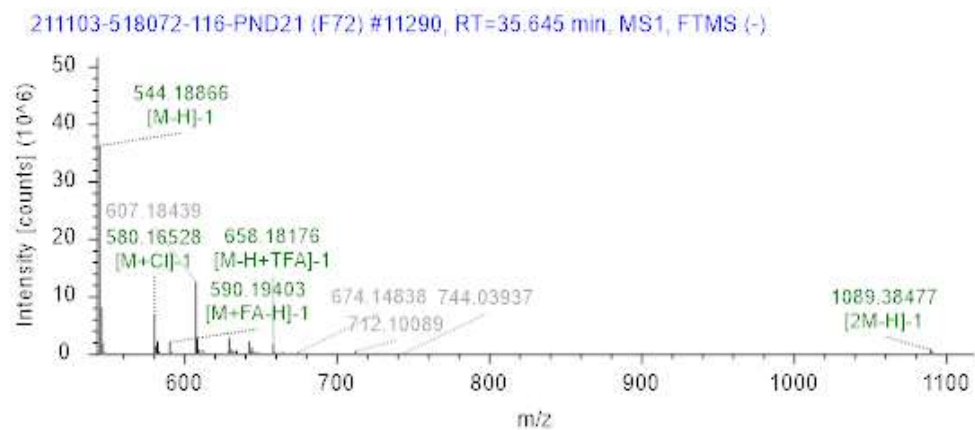

211103-518072-116-PND21 (F72) #11291, RT=35.648 min, MS2, FTMS (-), (HCD, DDA, 544.1884@30, -1)

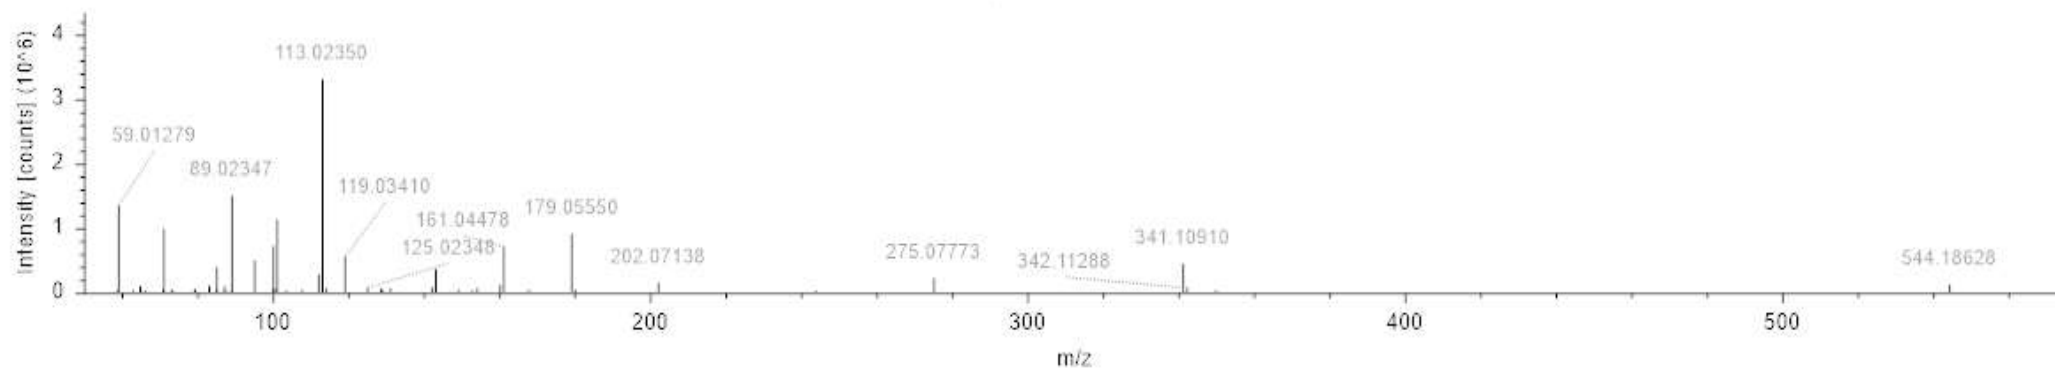





| Structure | Name | RT [min] | Formula | Calc. MW  | Areas |
|-----------|------|----------|---------|-----------|-------|
| n/a       |      | 38.60    | n/a     | 707.24828 |       |

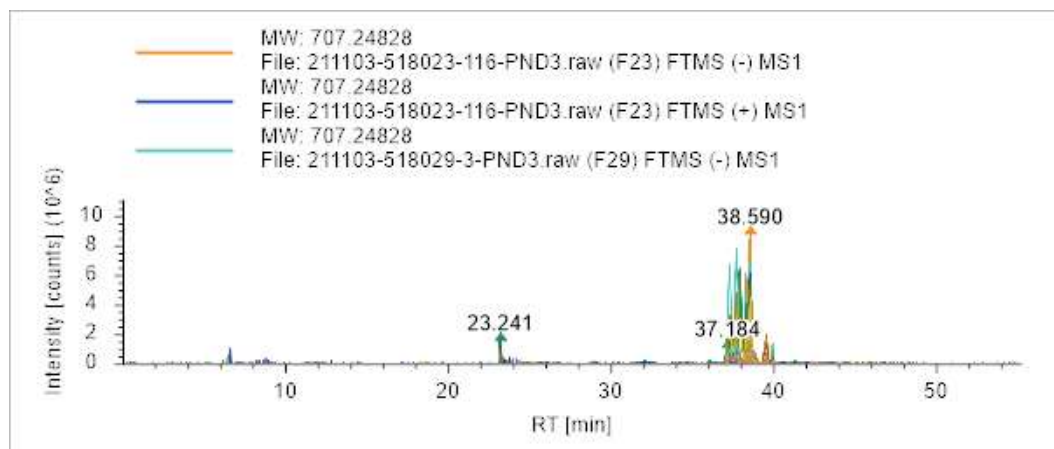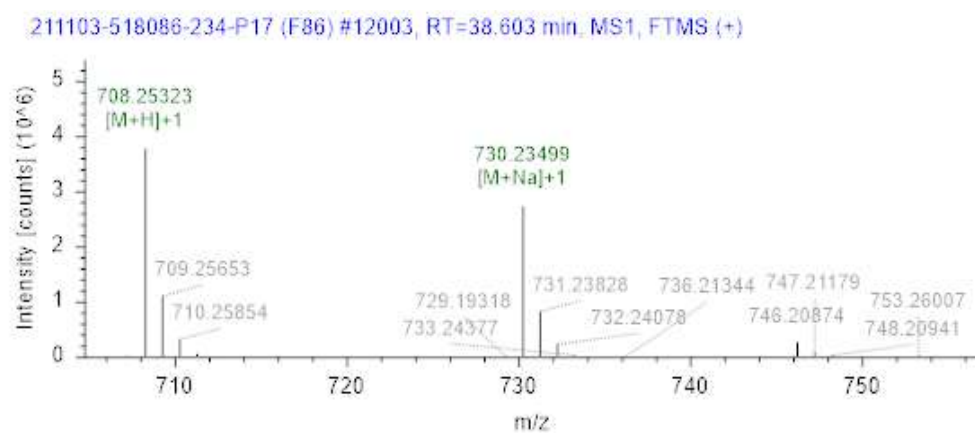

211103-518086-234-P17 (F86) #11999, RT=38.585 min, MS2, FTMS (+), (HCD, DDA, 708.2534@30, +1)

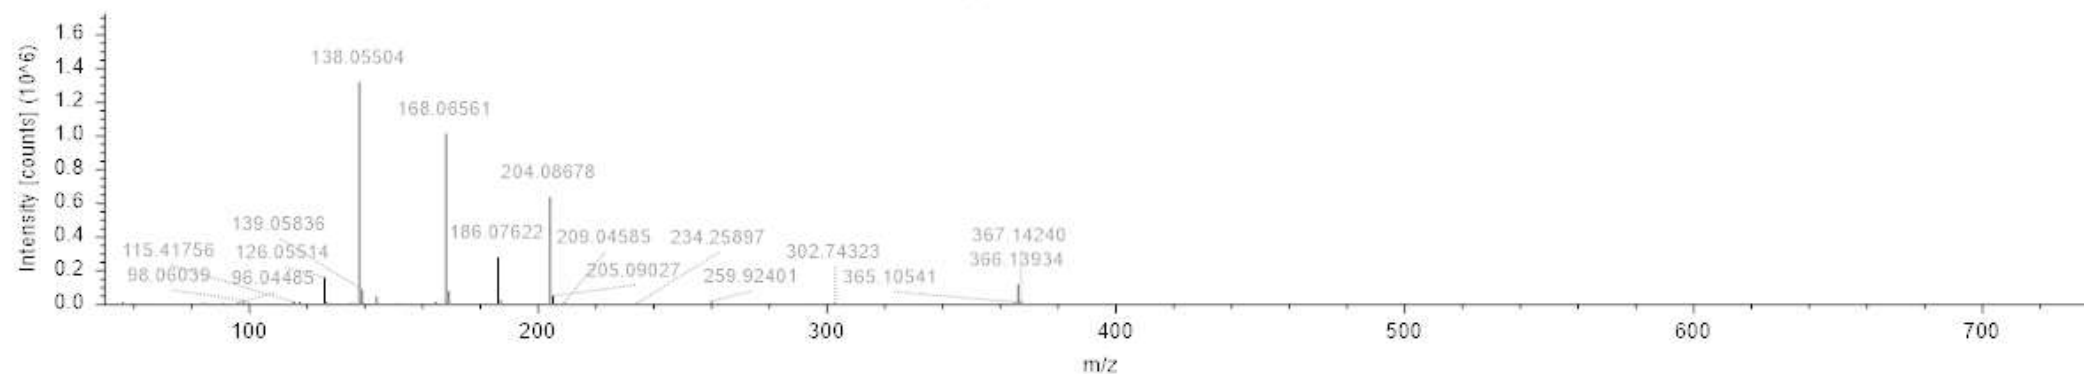



| Structure | Name | RT [min] | Formula | Calc. MW  | Areas |
|-----------|------|----------|---------|-----------|-------|
| n/a       |      | 2.70     | n/a     | 814.29242 |       |

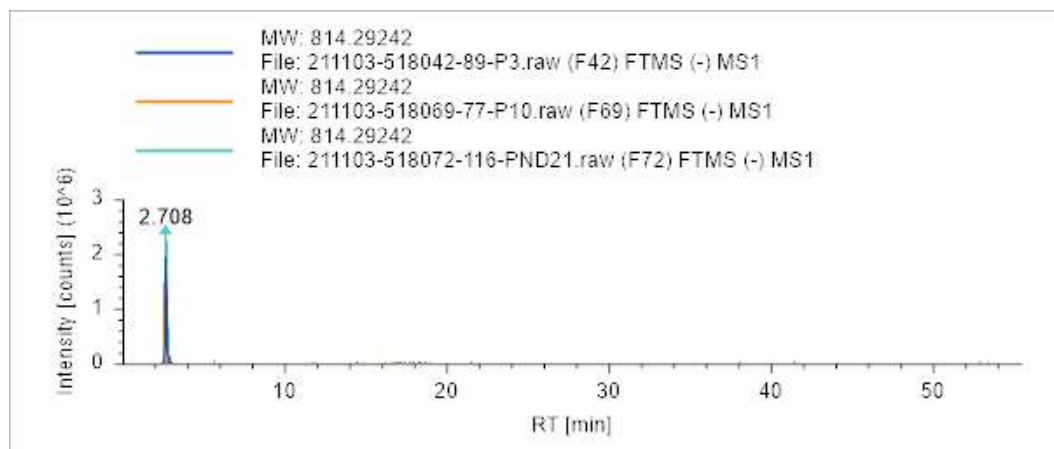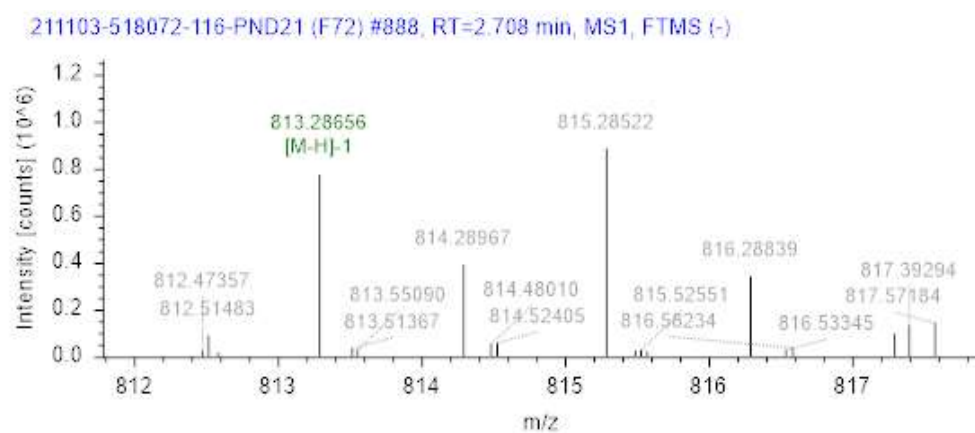

211103-518072-116-PND21 (F72) #892, RT=2.715 min, MS2, FTMS (-), (HCD, DDA, 815.2852@30, -1)

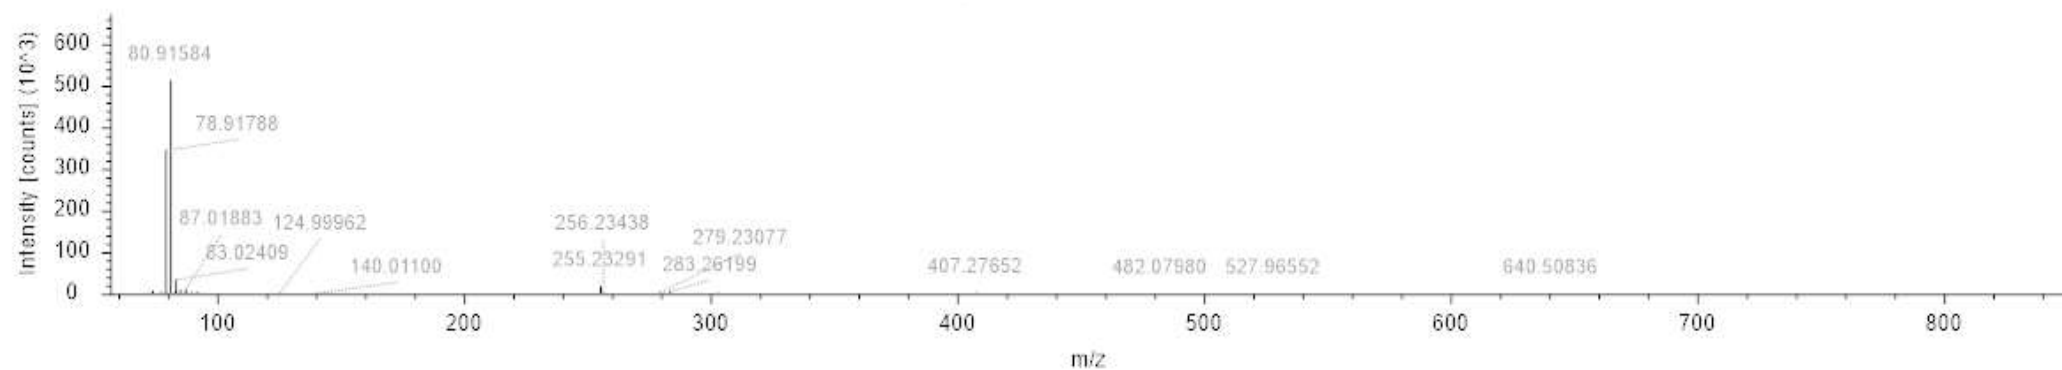



| Structure | Name | RT [min] | Formula | Calc. MW   | Areas |
|-----------|------|----------|---------|------------|-------|
| n/a       |      | 32.78    | n/a     | 1008.33652 |       |

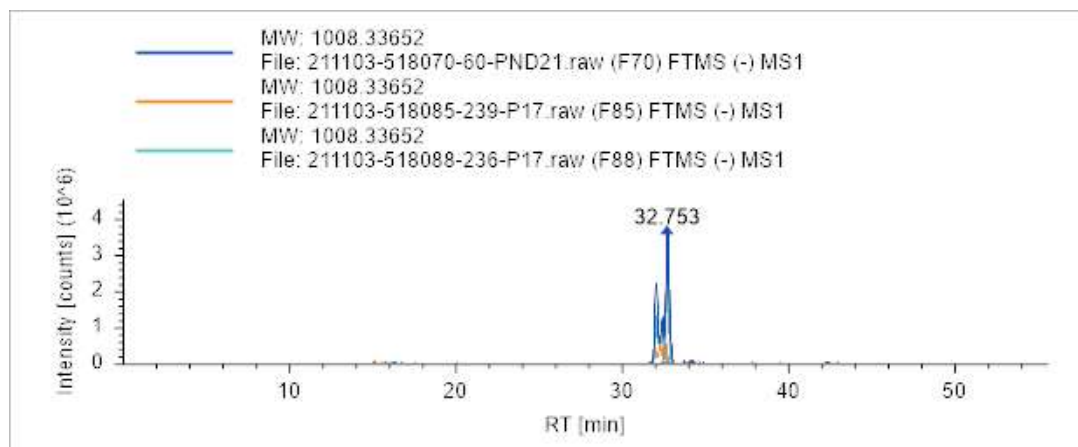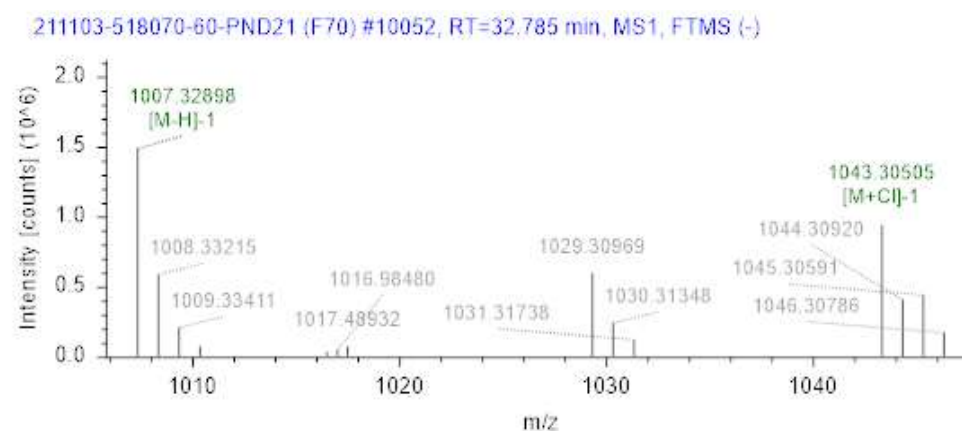

211103-518070-60-PND21 (F70) #10064, RT=32.816 min, MS2, FTMS (-), (HCD, DDA, 1007.3290@30, -1)

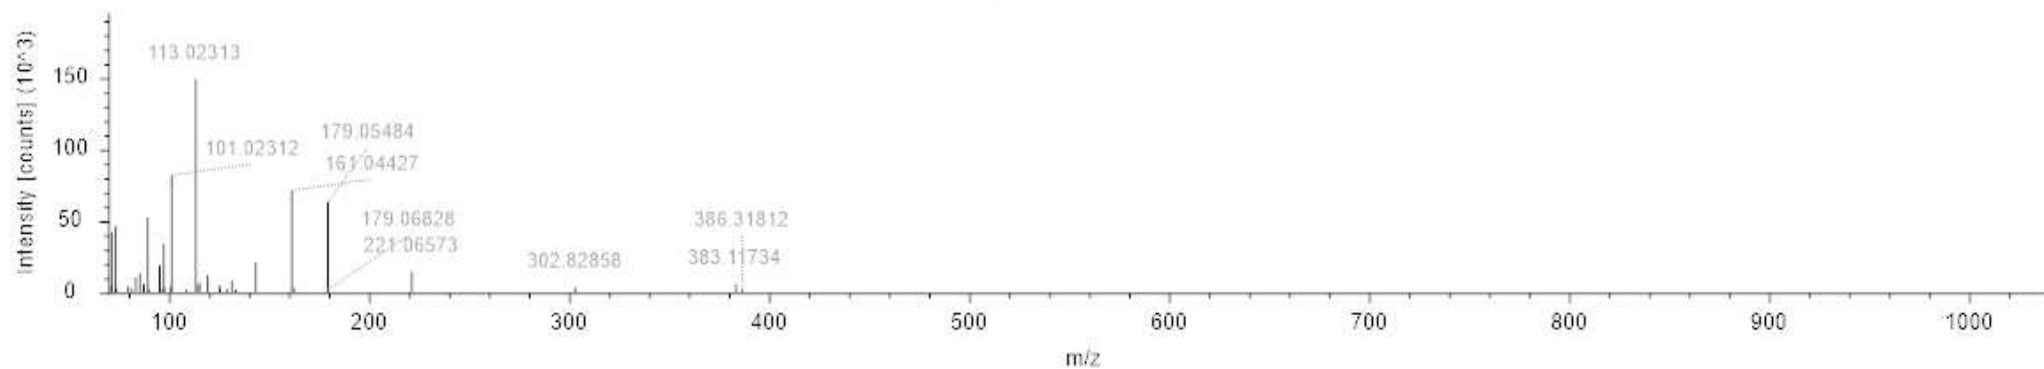



| Structure | Name | RT [min] | Formula | Calc. MW   | Areas |
|-----------|------|----------|---------|------------|-------|
| n/a       |      | 30.98    | n/a     | 1072.37694 |       |

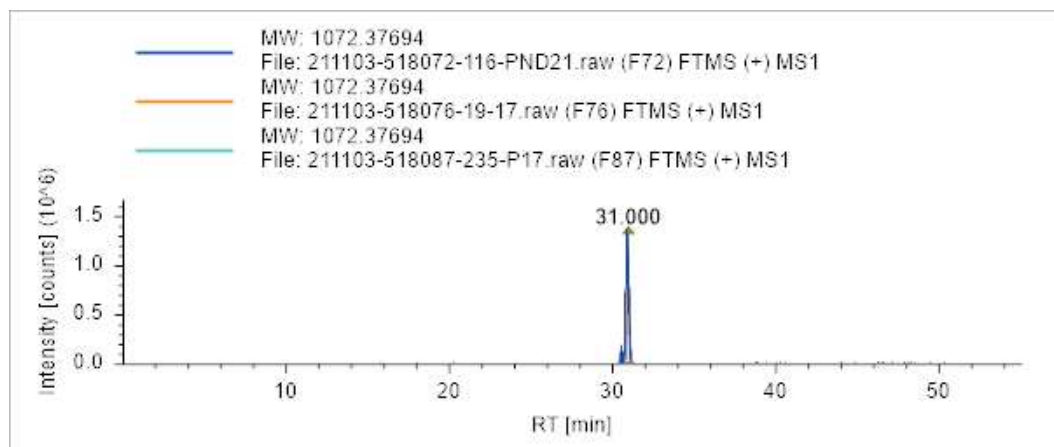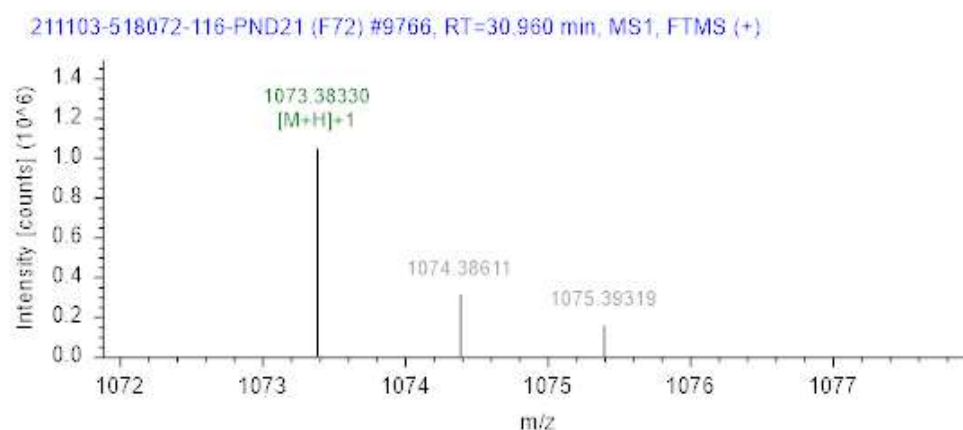

211103-518072-116-PND21 (F72) #9791, RT=31.015 min, MS2, FTMS (+), (HCD, DDA, 1073.3860@30, +1)

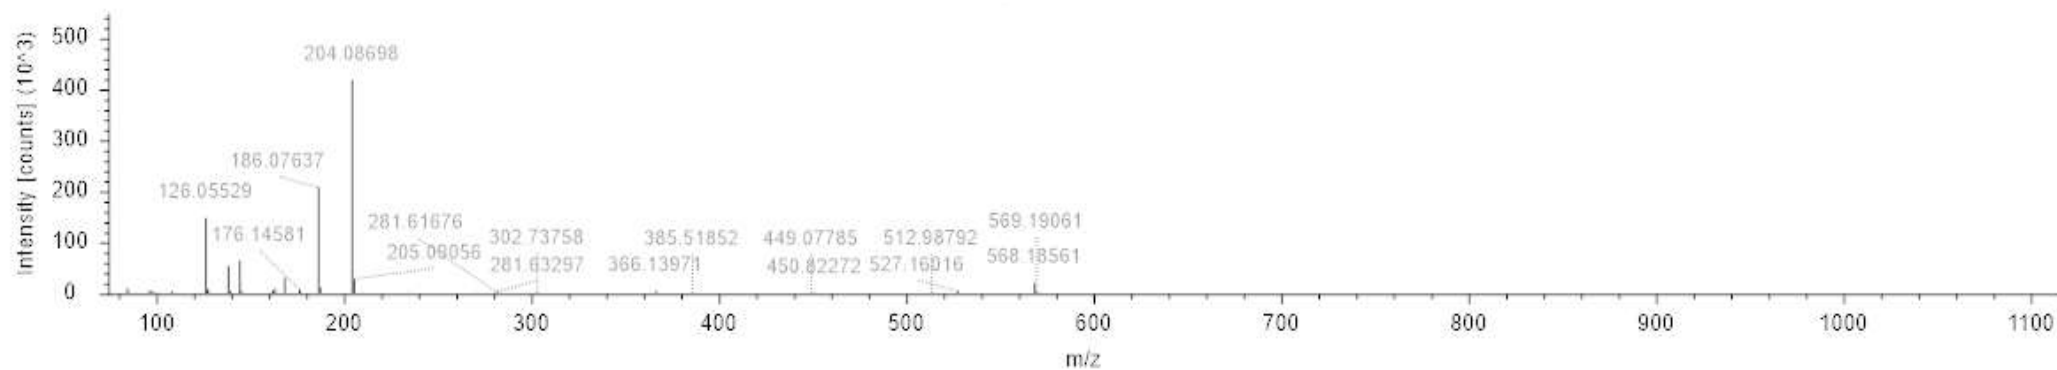



| Structure | Name | RT [min] | Formula | Calc. MW   | Areas |
|-----------|------|----------|---------|------------|-------|
| n/a       |      | 15.29    | n/a     | 1754.66715 |       |

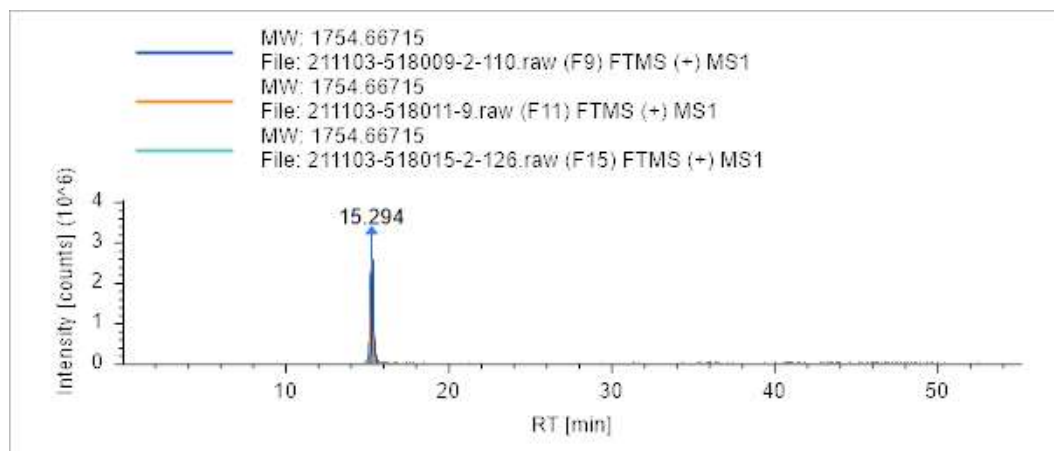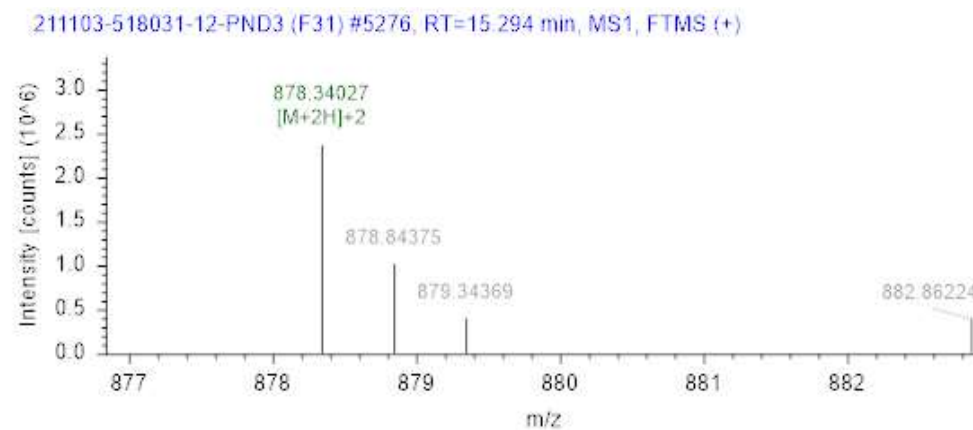



| Structure | Name | RT [min] | Formula | Calc. MW  | Areas   |
|-----------|------|----------|---------|-----------|---------|
| n/a       |      | 29.26    | n/a     | 488.17397 | 1.44e10 |

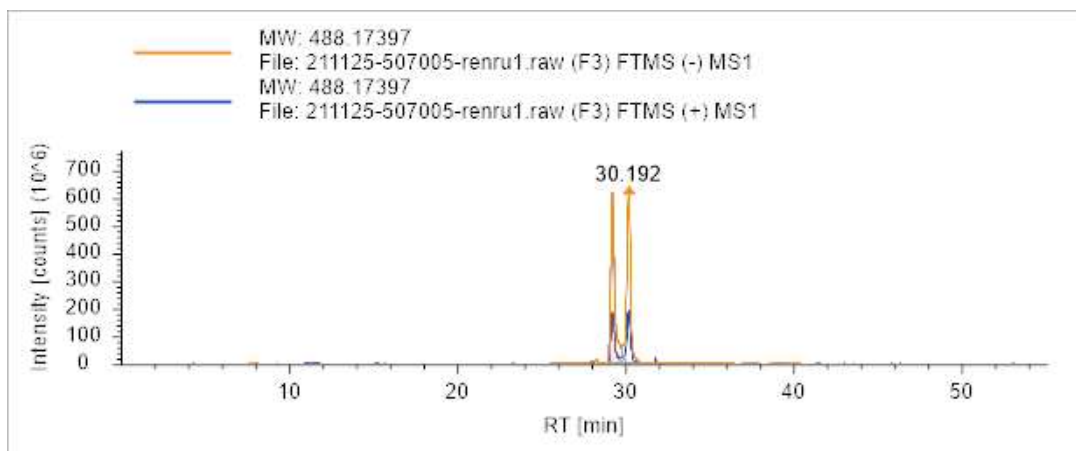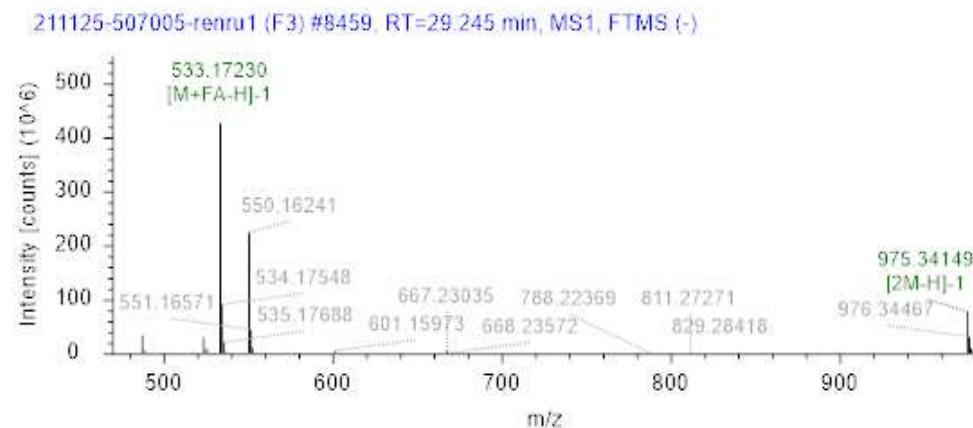

211125-507005-renru1 (F3) #8430, RT=29.177 min, MS2, FTMS (+), (HCD, DDA, 489.1803@30, +1)

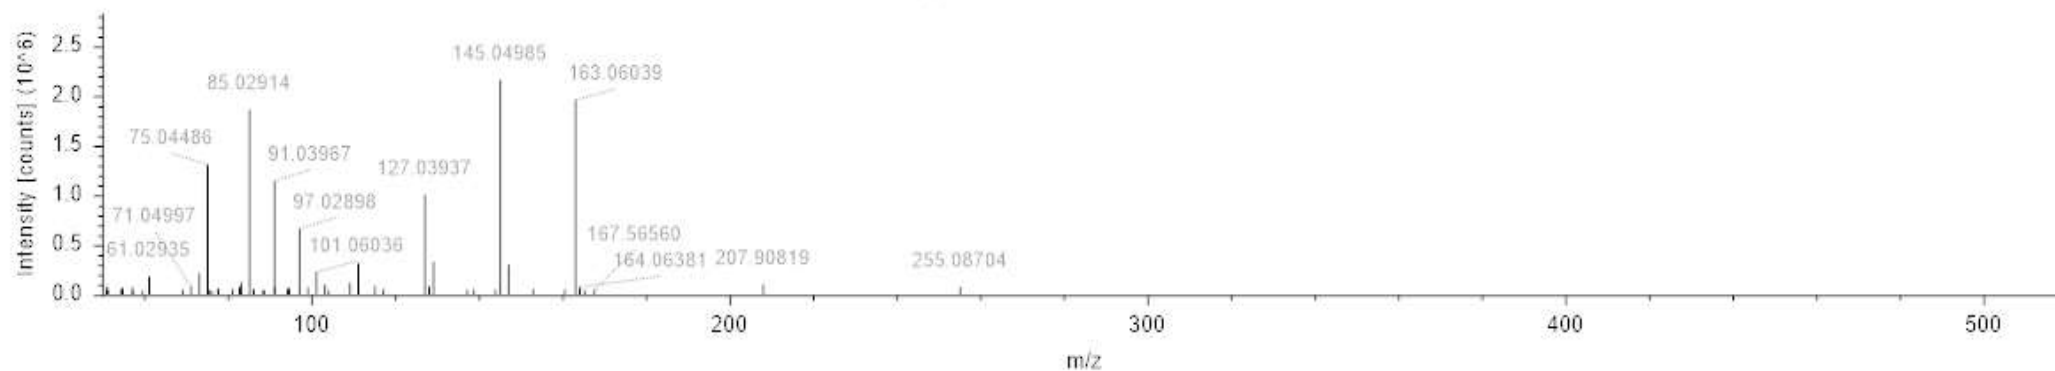





| Structure | Name | RT [min] | Formula | Calc. MW  | Areas   |
|-----------|------|----------|---------|-----------|---------|
| n/a       |      | 30.22    | n/a     | 488.17399 | 1.69e10 |

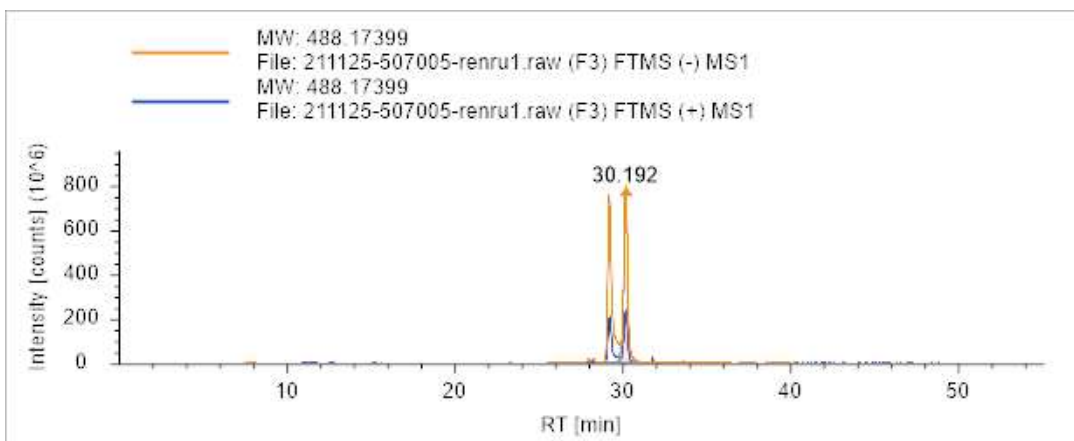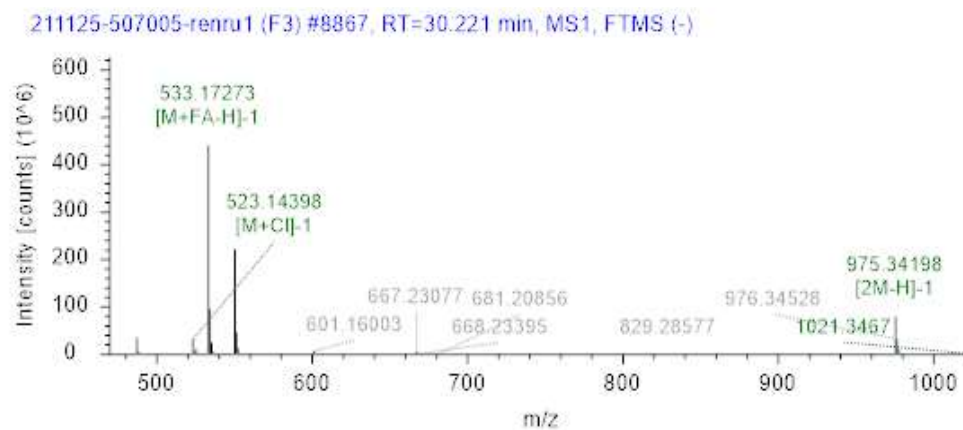

211125-507005-renru1 (F3) #8838, RT=30.154 min, MS2, FTMS (+), (HCD, DDA, 489.1801@30, +1)

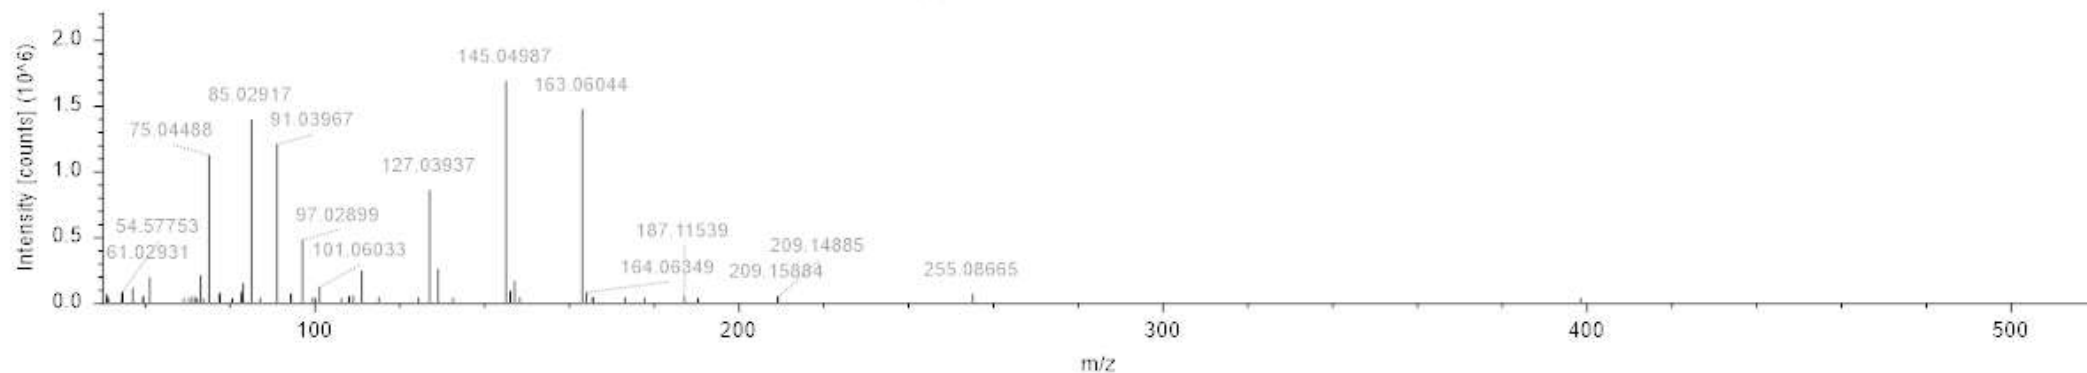



| Structure | Name | RT [min] | Formula | Calc. MW  | Areas  |
|-----------|------|----------|---------|-----------|--------|
| n/a       |      | 28.29    | n/a     | 488.17443 | 3.67e7 |

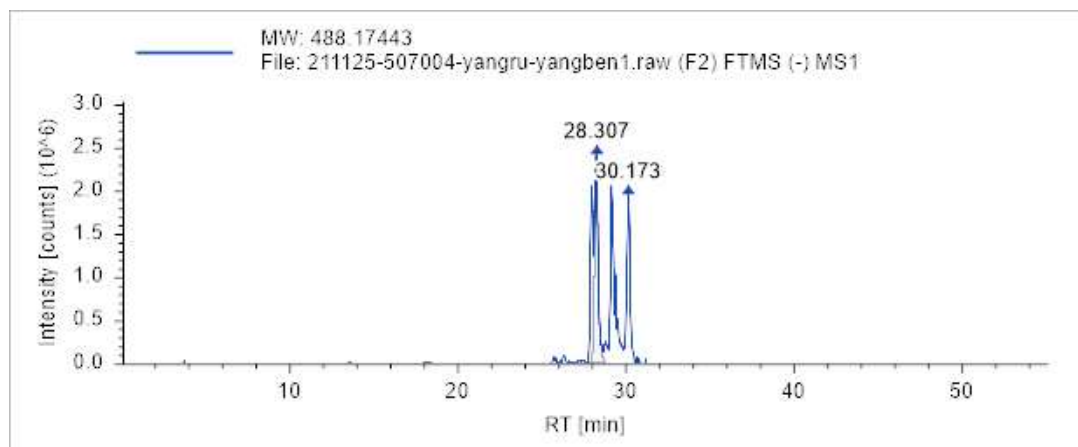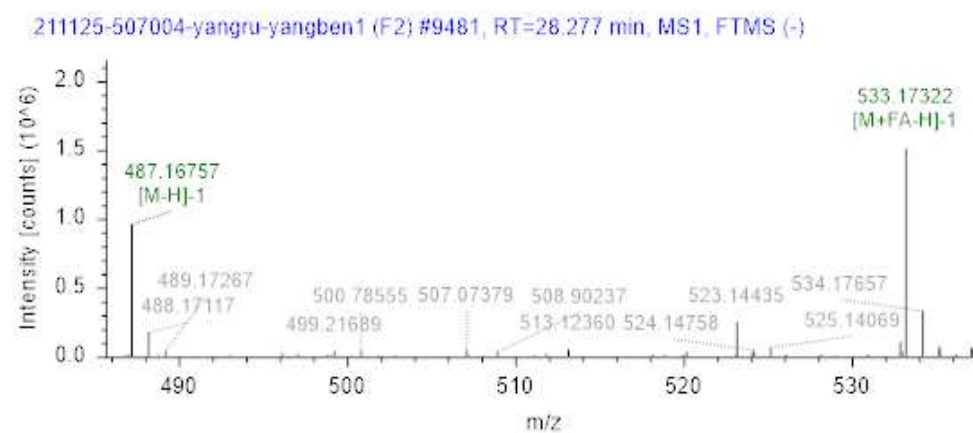

211125-507004-yangru-yangben1 (F2) #9495, RT=28.311 min, MS2, FTMS (-), (HCD, DDA, 487.1676@30, -1)

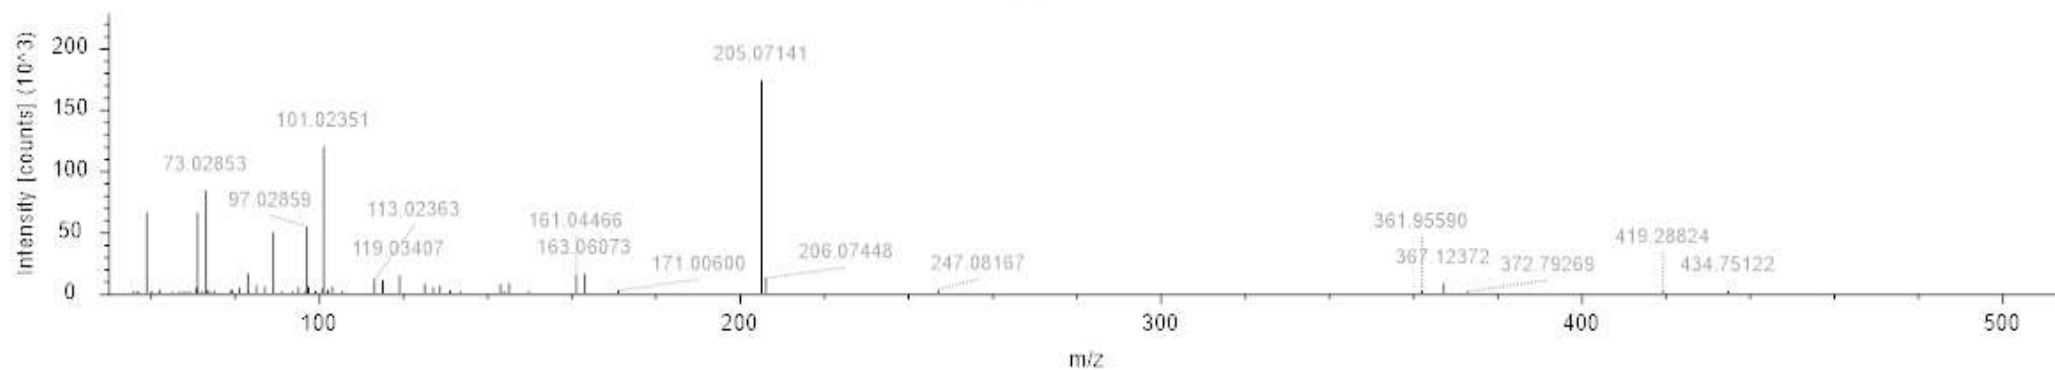



| Structure | Name | RT [min] | Formula | Calc. MW  | Areas                |
|-----------|------|----------|---------|-----------|----------------------|
| n/a       |      | 24.15    | n/a     | 504.16722 | 4.32e8 3.80e8 1.19e9 |

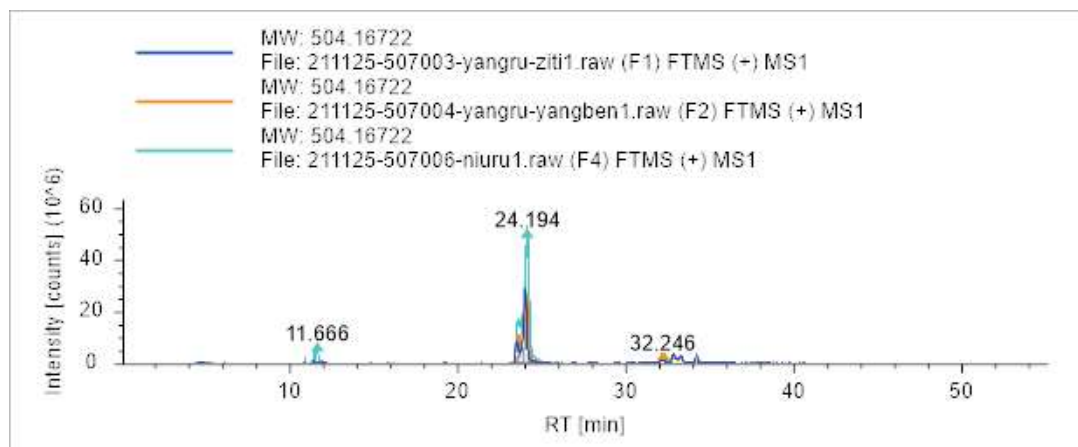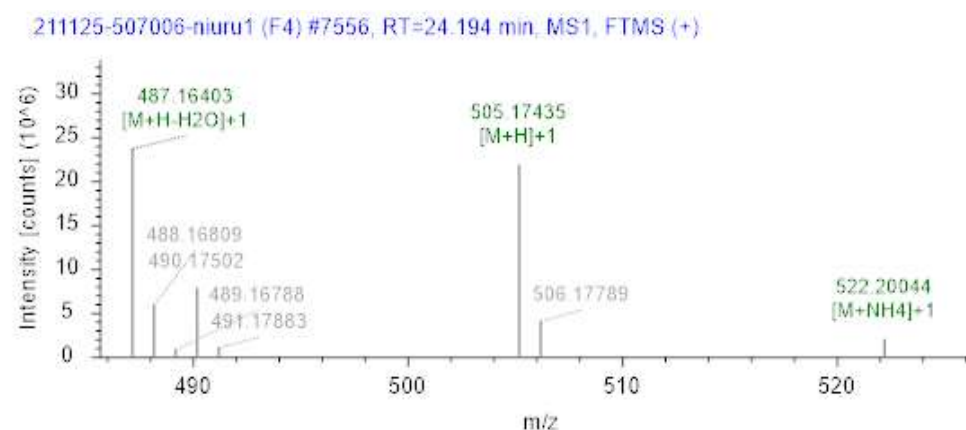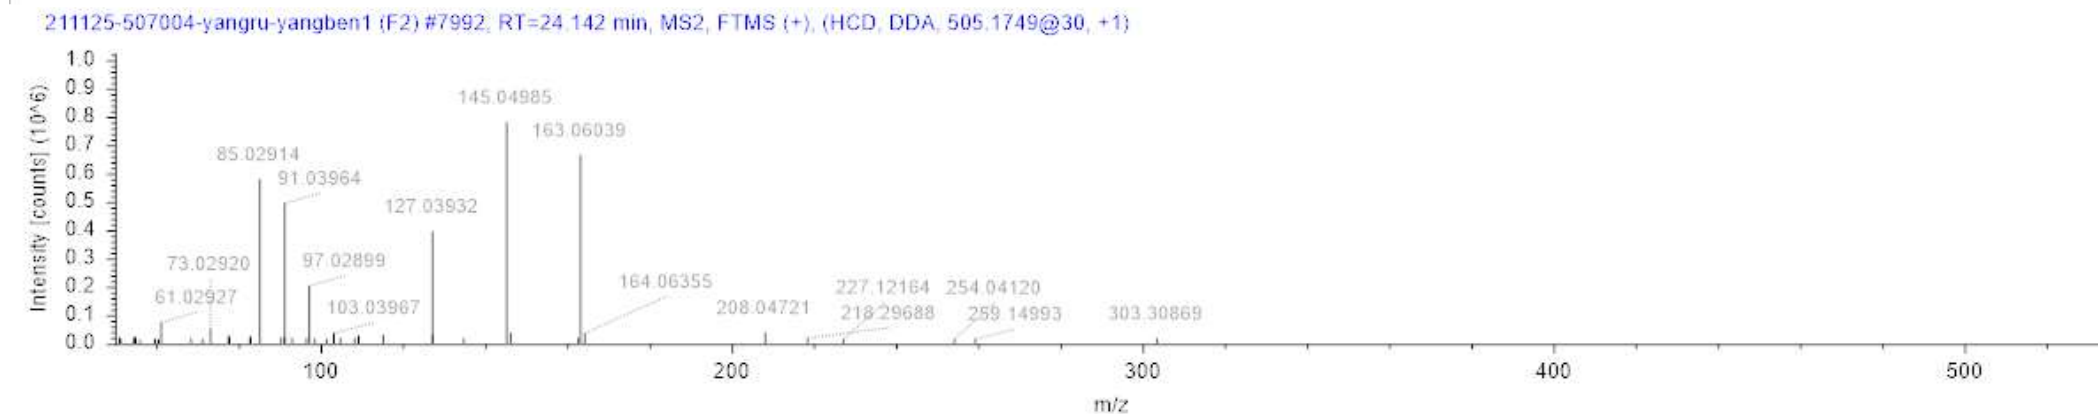



| Structure | Name | RT [min] | Formula | Calc. MW  | Areas                |
|-----------|------|----------|---------|-----------|----------------------|
| n/a       |      | 32.24    | n/a     | 504.16808 | 1.55e8 1.18e9 5.83e8 |

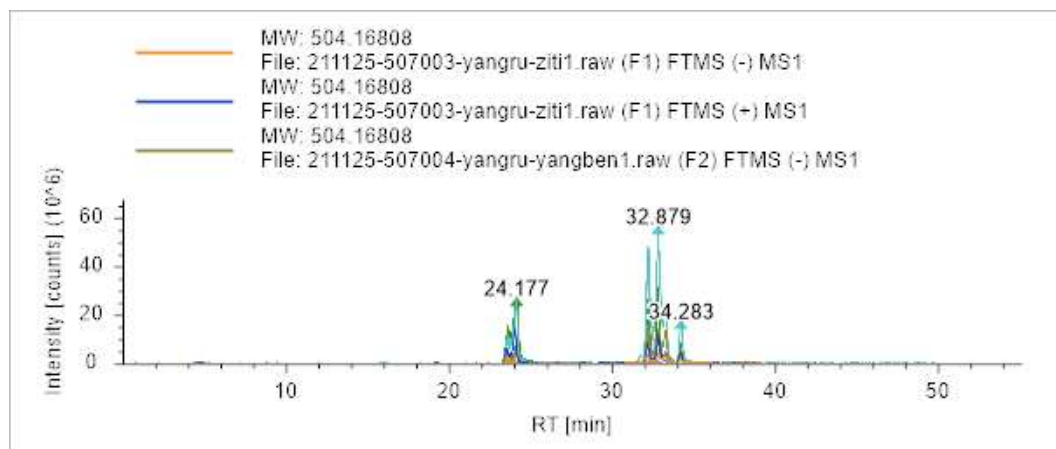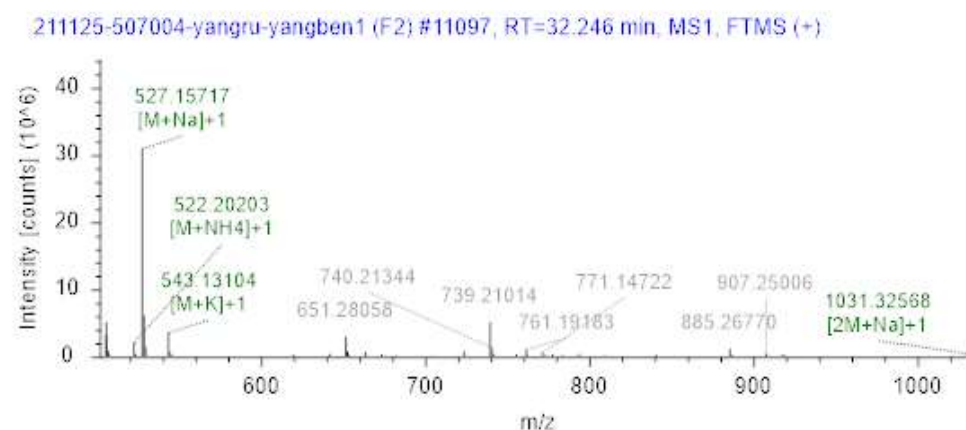

211125-507004-yangru-yangben1 (F2) #11056, RT=32.148 min, MS2, FTMS (-), (HCD, DDA, 503.1625@30, -1)

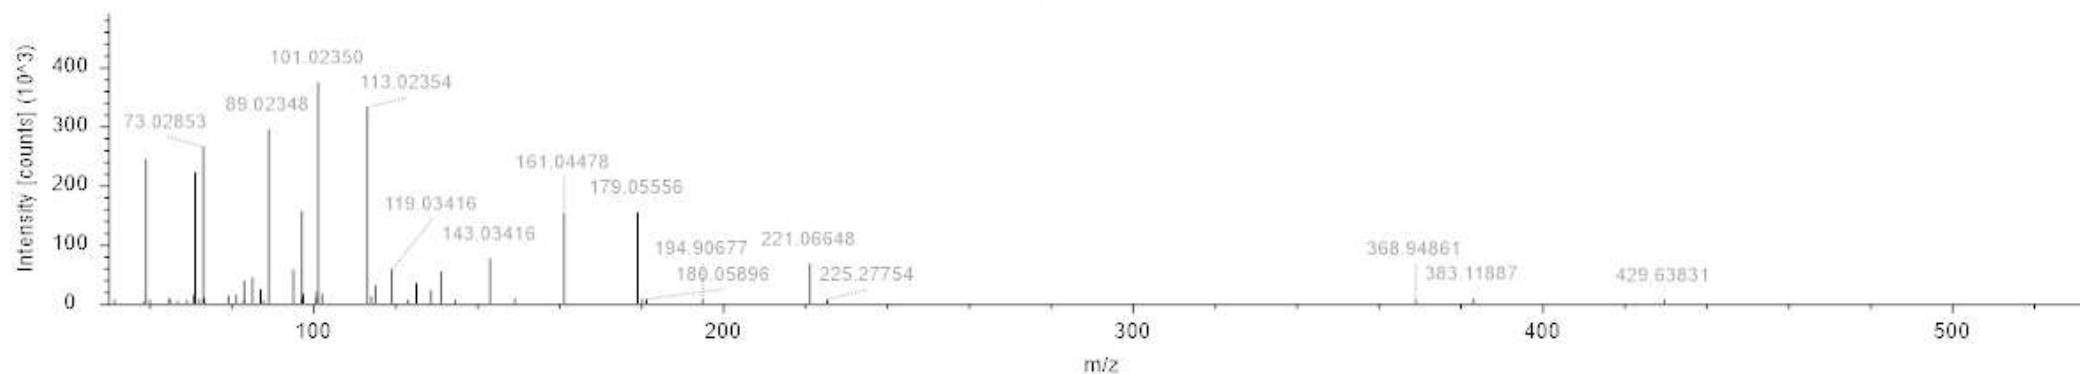



| Structure | Name | RT [min] | Formula | Calc. MW  | Areas                       |
|-----------|------|----------|---------|-----------|-----------------------------|
| n/a       |      | 32.89    | n/a     | 504.16836 | 2.48e8 1.65e9 6.67e8 1.06e9 |

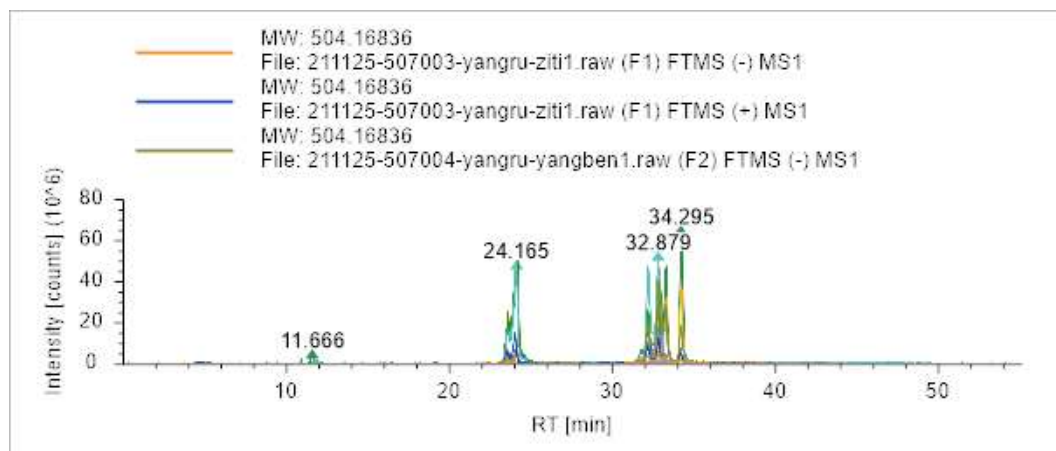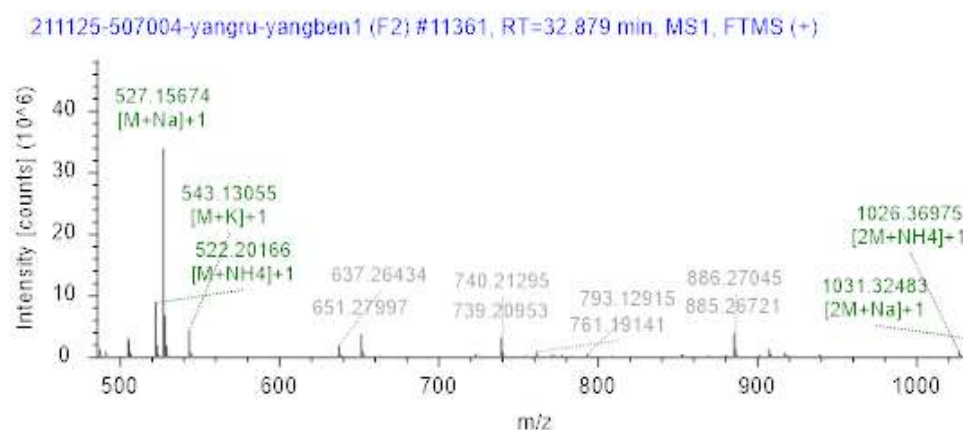

211125-507004-yangru-yangben1 (F2) #11392, RT=32.952 min, MS2, FTMS (-), (HCD, DDA, 503.1621@30, -1)

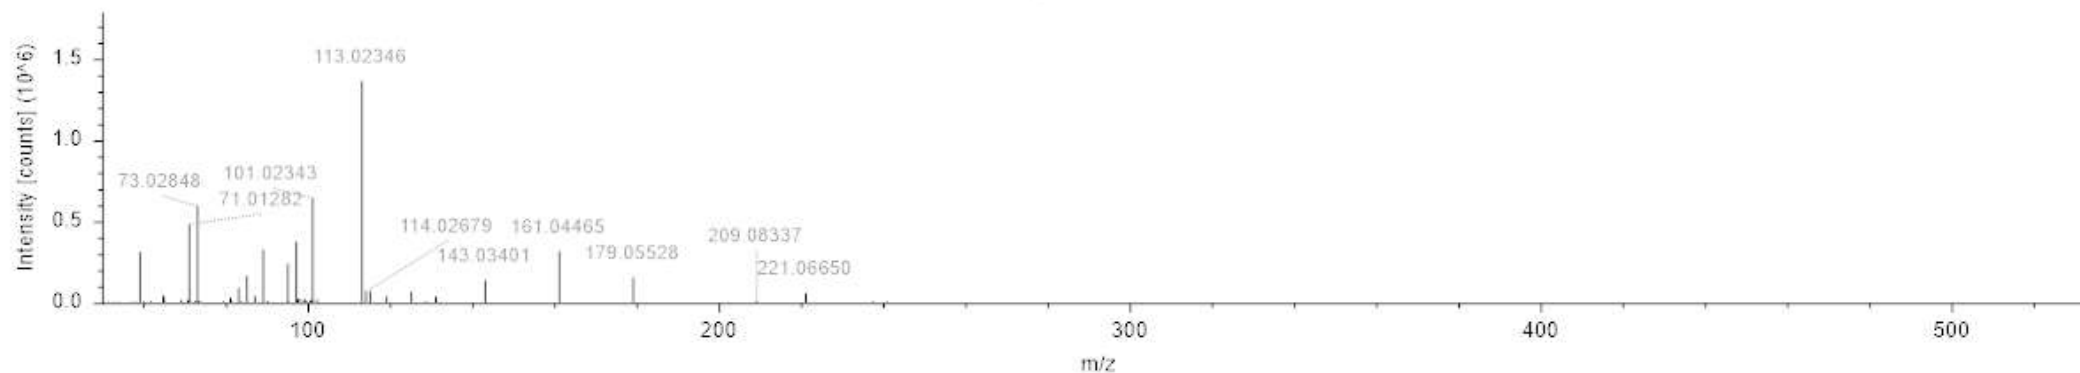



| Structure | Name | RT [min] | Formula | Calc. MW  | Areas                |
|-----------|------|----------|---------|-----------|----------------------|
| n/a       |      | 34.28    | n/a     | 504.16839 | 6.50e8 6.05e7 1.41e9 |

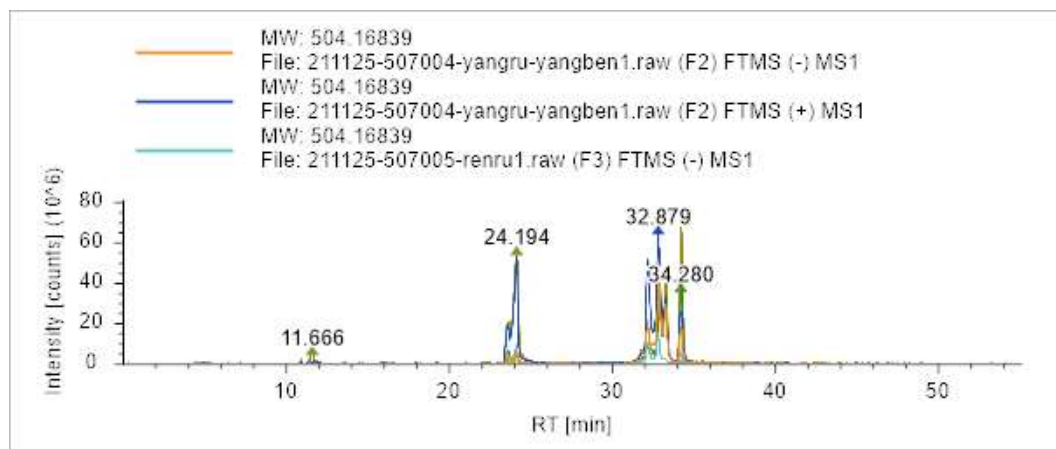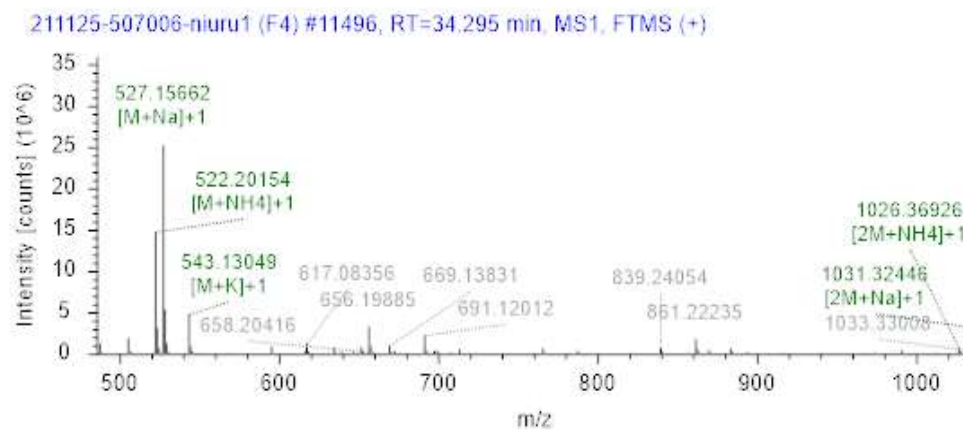

211125-507006-niuru1 (F4) #11480, RT=34.254 min, MS2, FTMS (-), (HCD, DDA, 503.1621@30, -1)

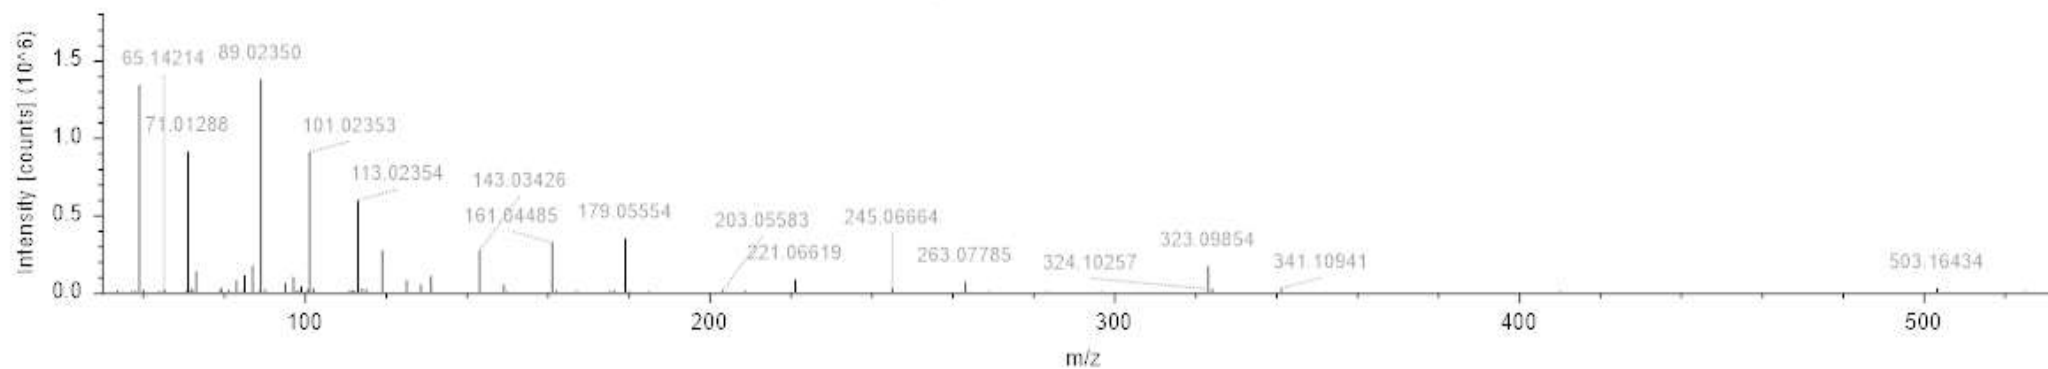





| Structure | Name | RT [min] | Formula | Calc. MW  | Areas  |        |        |  |  |
|-----------|------|----------|---------|-----------|--------|--------|--------|--|--|
| n/a       |      | 33.33    | n/a     | 504.16882 | 9.03e7 | 4.18e8 | 1.14e9 |  |  |

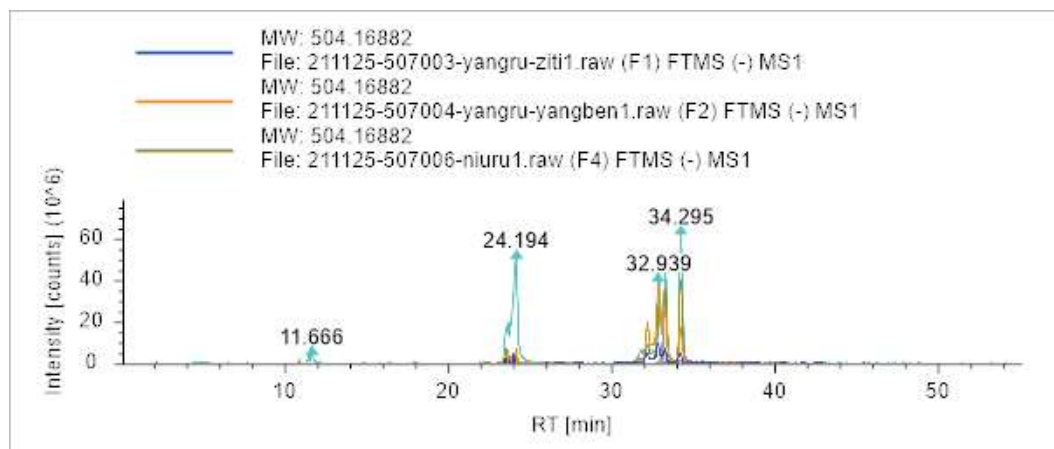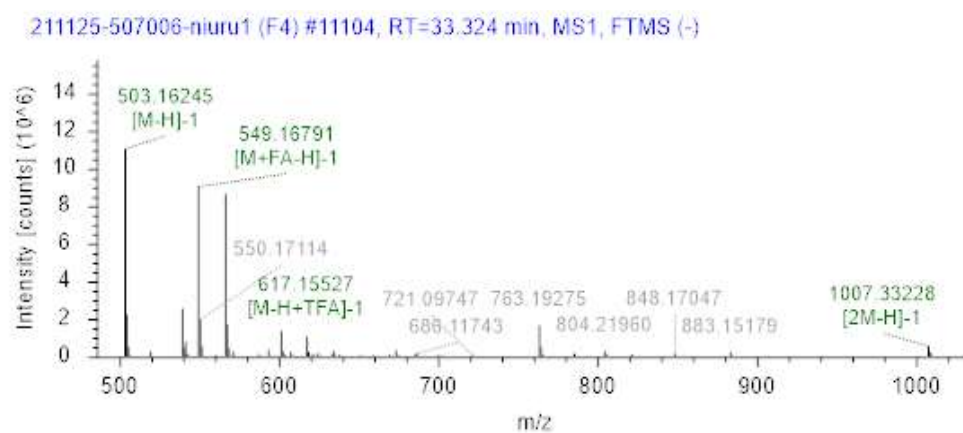

211125-507006-niuru1 (F4) #11069, RT=33.237 min, MS2, FTMS (-), (HCD, DDA, 503.1628@30, -1)

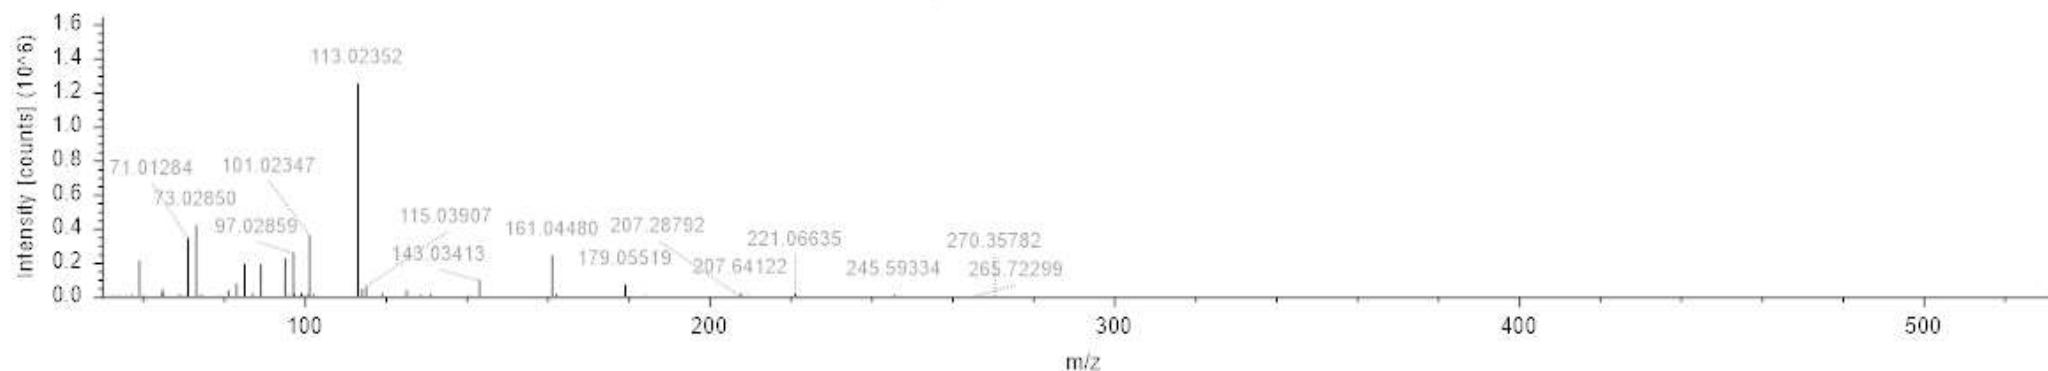



| Structure | Name | RT [min] | Formula | Calc. MW  | Areas                |
|-----------|------|----------|---------|-----------|----------------------|
| n/a       |      | 26.57    | n/a     | 529.19997 | 3.97e7 4.22e8 1.92e8 |

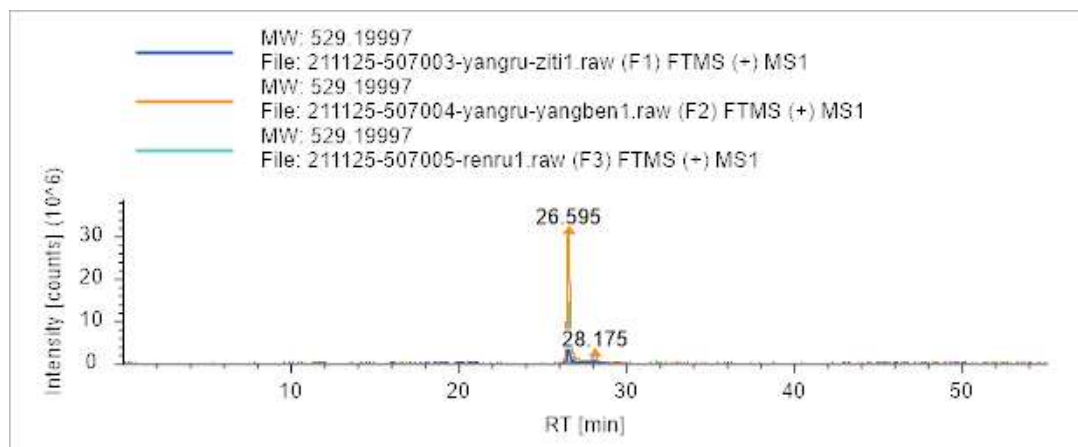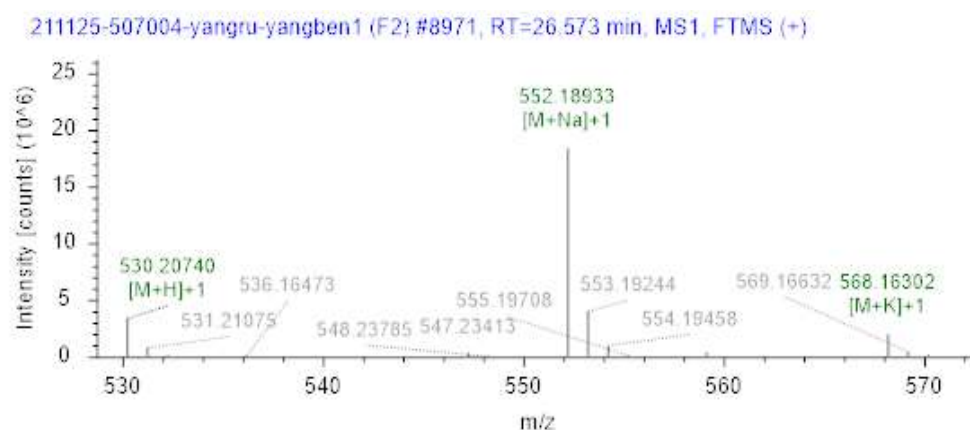

211125-507004-yangru-yangben1 (F2) #8979, RT=26.599 min, MS2, FTMS (+), (HCD, DDA, 530.2074@30, +1)

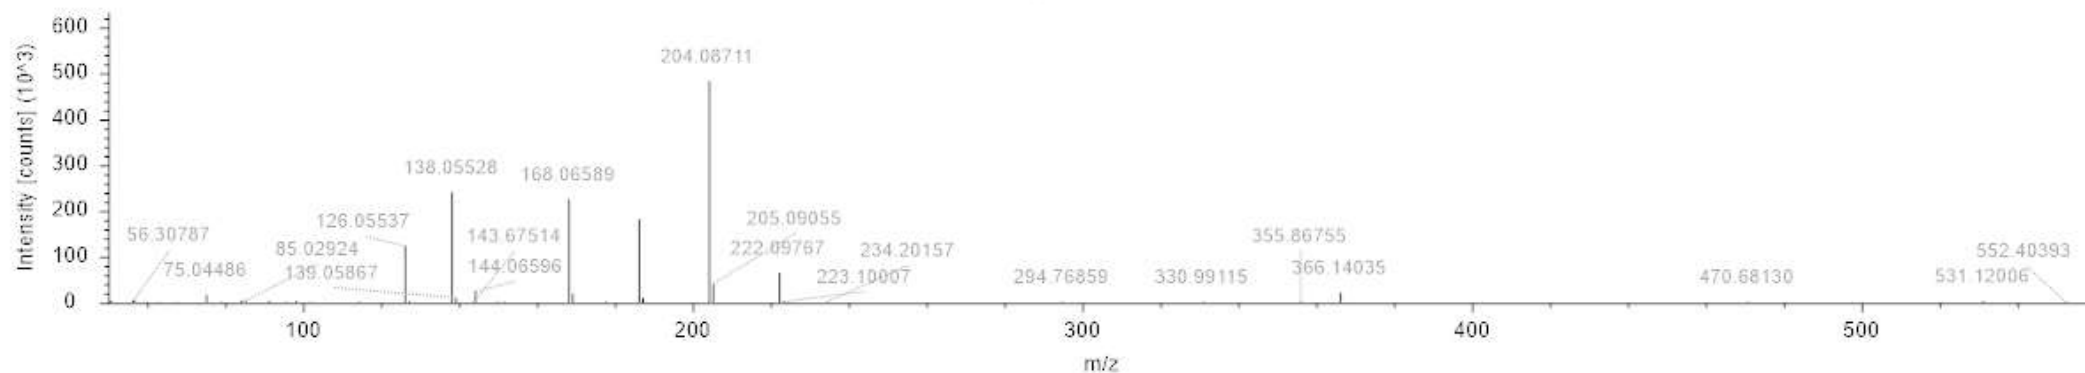



| Structure | Name | RT [min] | Formula | Calc. MW  | Areas  |
|-----------|------|----------|---------|-----------|--------|
| n/a       |      | 28.16    | n/a     | 529.20025 | 4.38e7 |

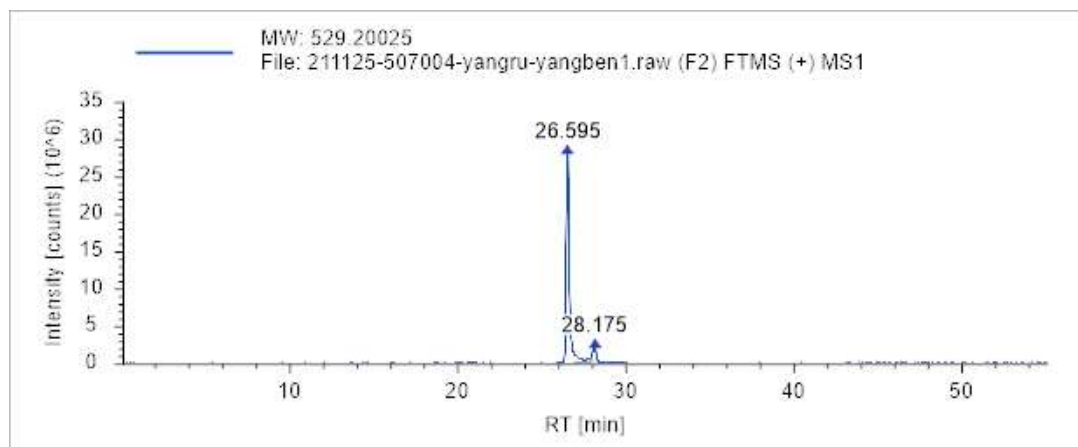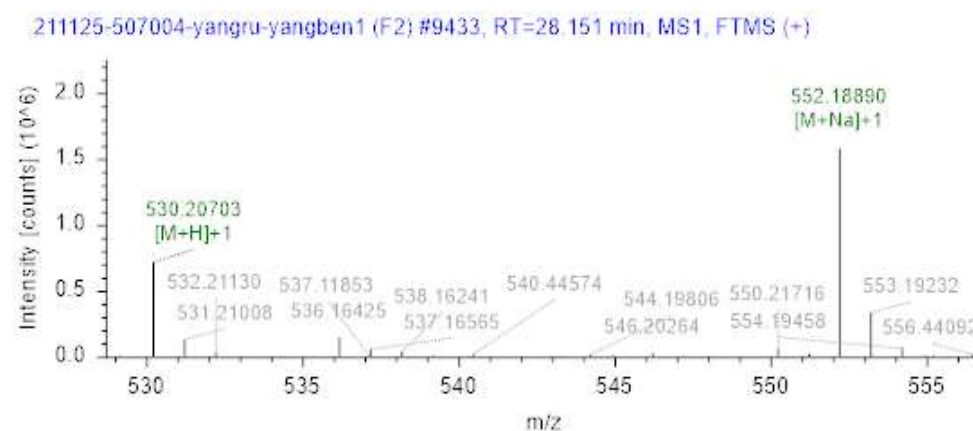

211125-507004-yangru-yangben1 (F2) #9444, RT=28.182 min, MS2, FTMS (+), (HCD, DDA, 530.2068@30, +1)

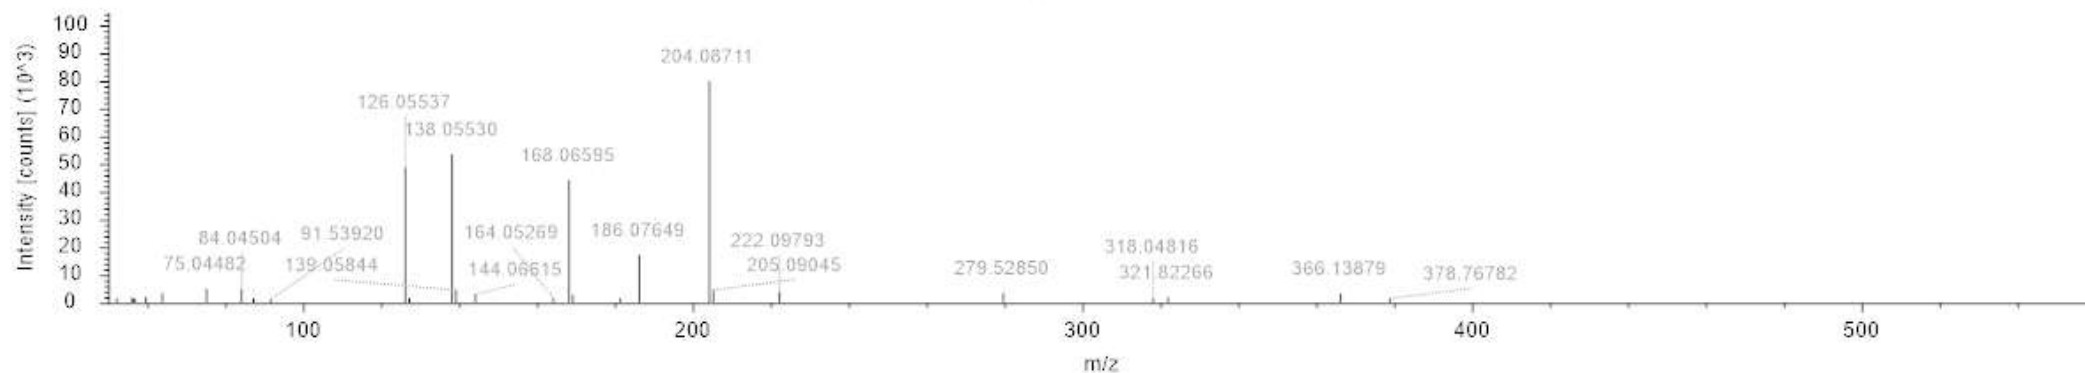



| Structure | Name | RT [min] | Formula | Calc. MW  | Areas  |
|-----------|------|----------|---------|-----------|--------|
| n/a       |      | 28.92    | n/a     | 545.19442 | 3.96e7 |

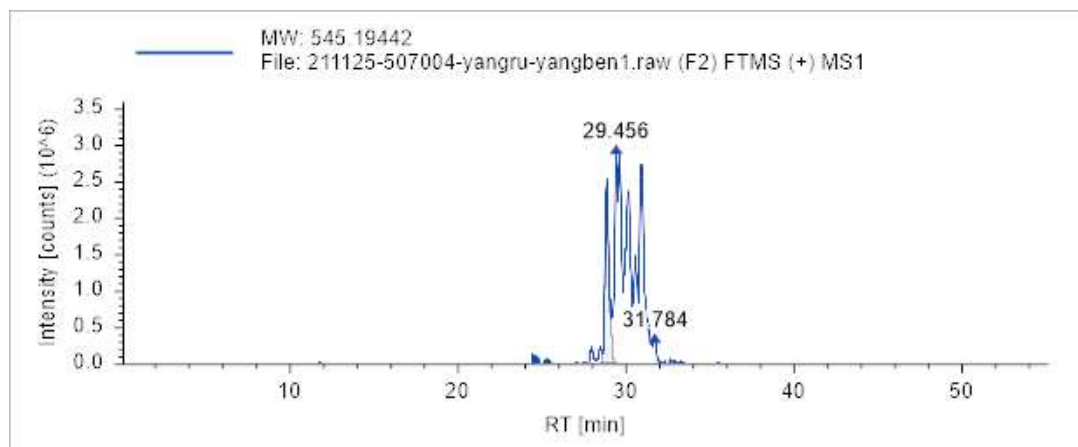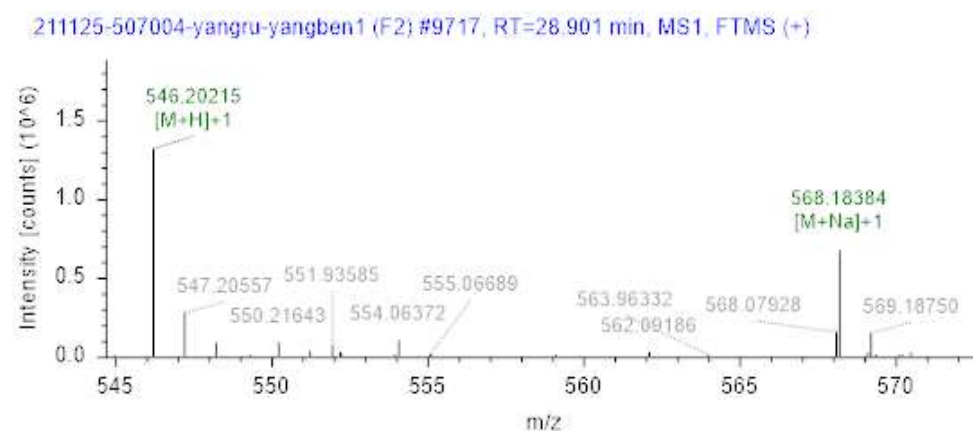

211125-507004-yangru-yangben1 (F2) #9730, RT=28.932 min, MS2, FTMS (+), (HCD, DDA, 546.2021@30, +1)

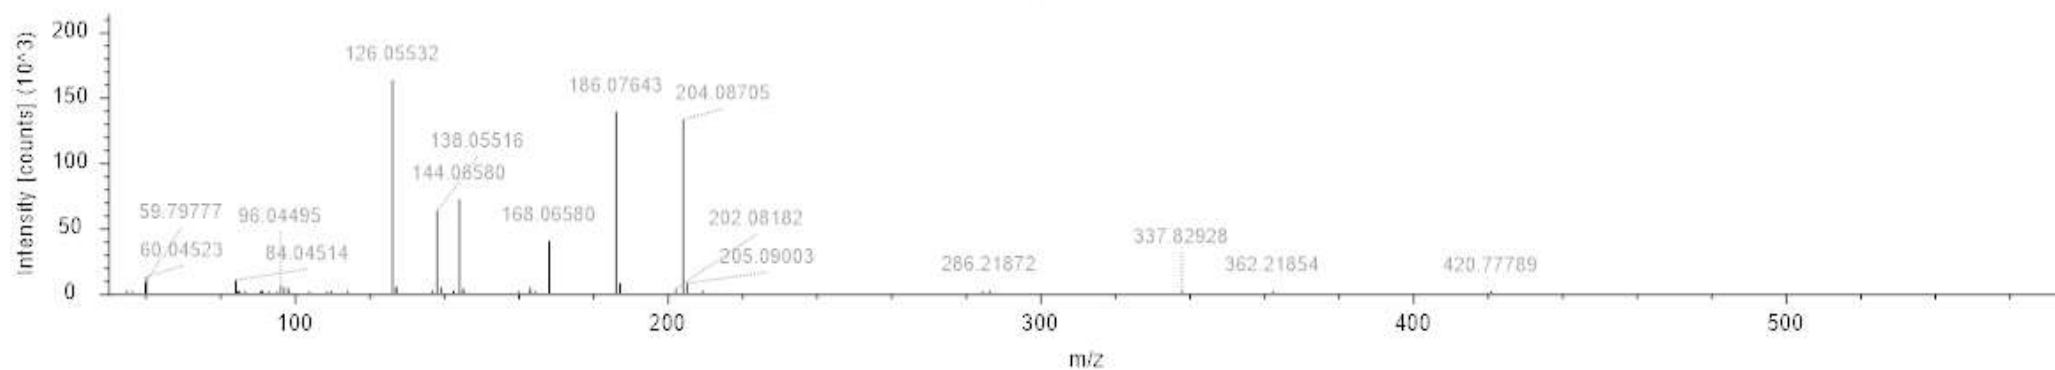



| Structure | Name | RT [min] | Formula | Calc. MW  | Areas  |
|-----------|------|----------|---------|-----------|--------|
| n/a       |      | 38.39    | n/a     | 545.19447 | 2.72e8 |

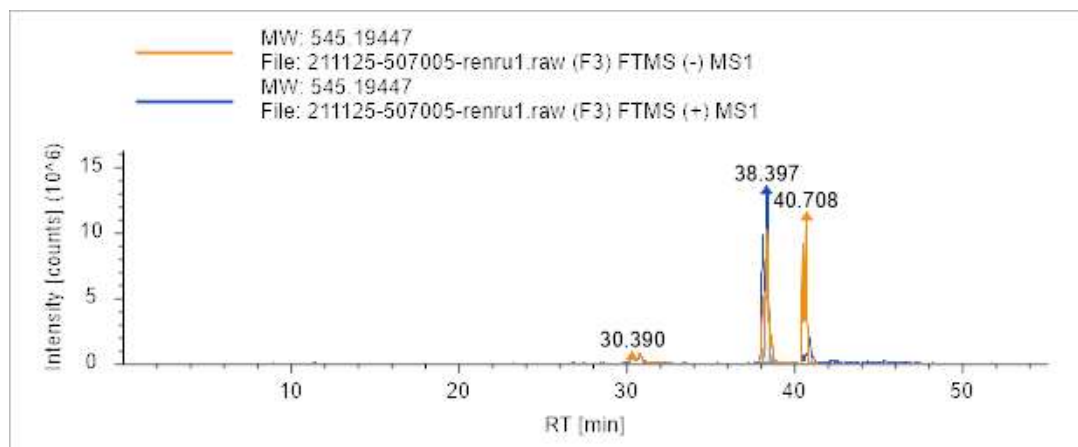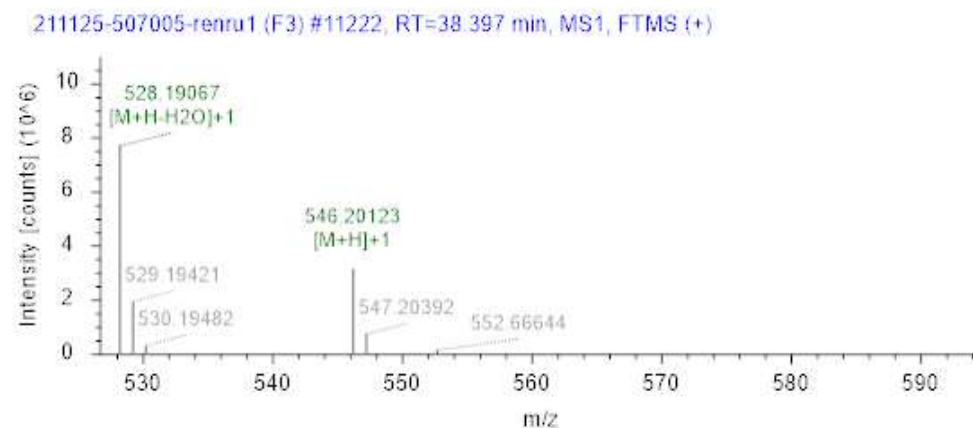

211125-507005-renru1 (F3) #11217, RT=38.385 min, MS2, FTMS (-), (HCD, DDA, 544.1880@30, -1)

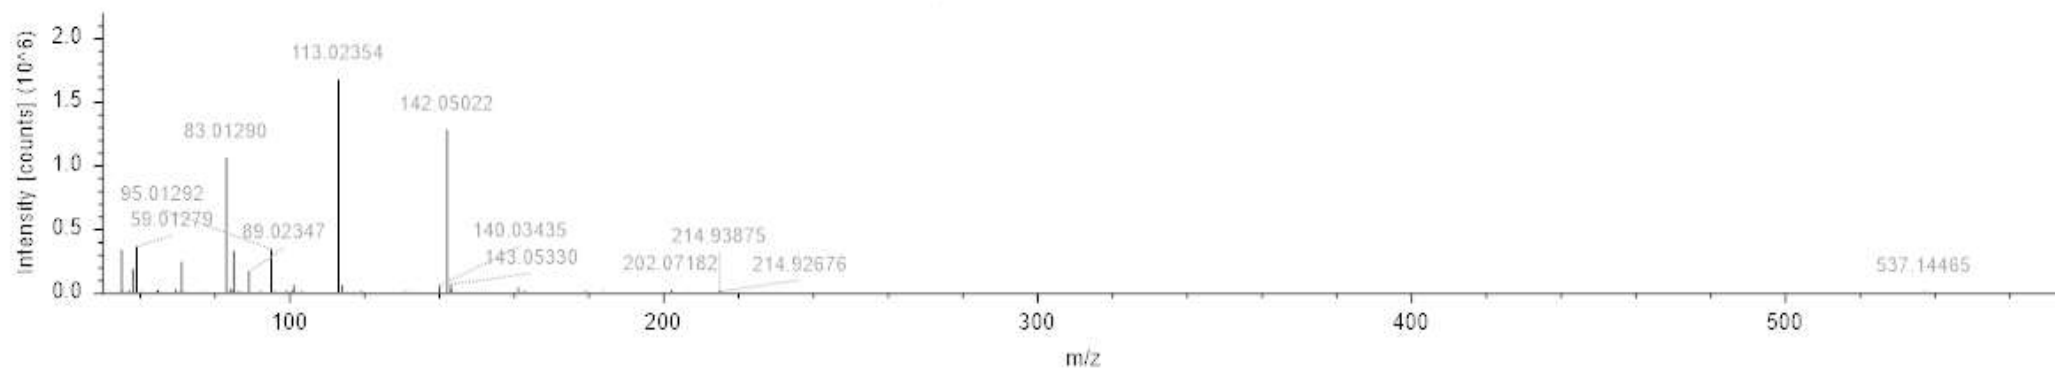



| Structure | Name | RT [min] | Formula | Calc. MW  | Areas  |
|-----------|------|----------|---------|-----------|--------|
| n/a       |      | 29.71    | n/a     | 545.19476 | 2.79e9 |

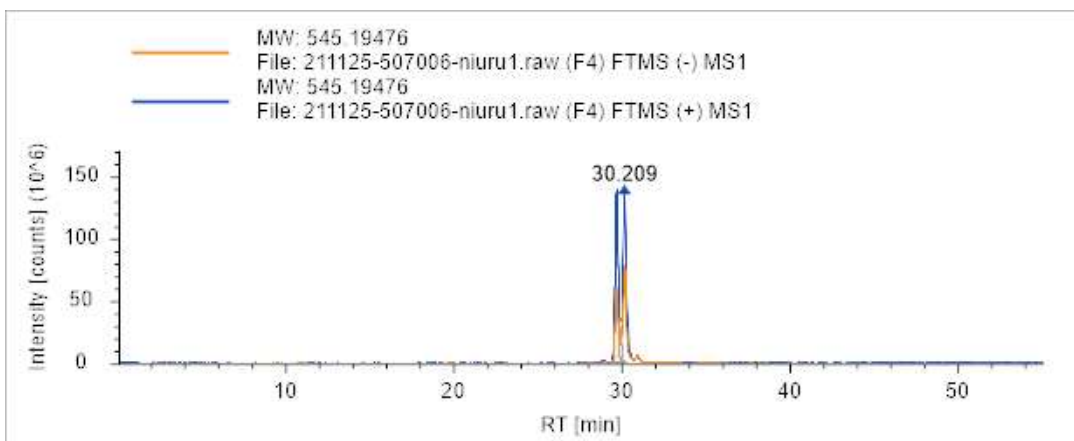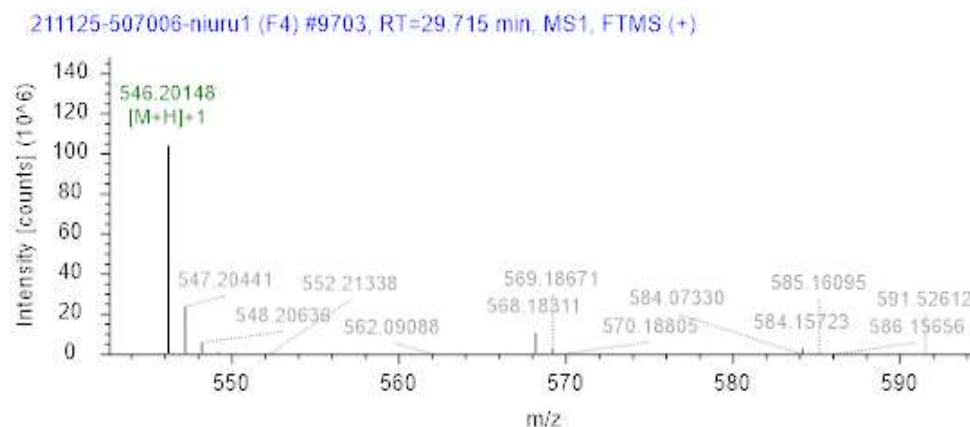

211125-507006-niuru1 (F4) #9668, RT=29.631 min, MS2, FTMS (+), (HCD, DDA, 546.2012@30, +1)

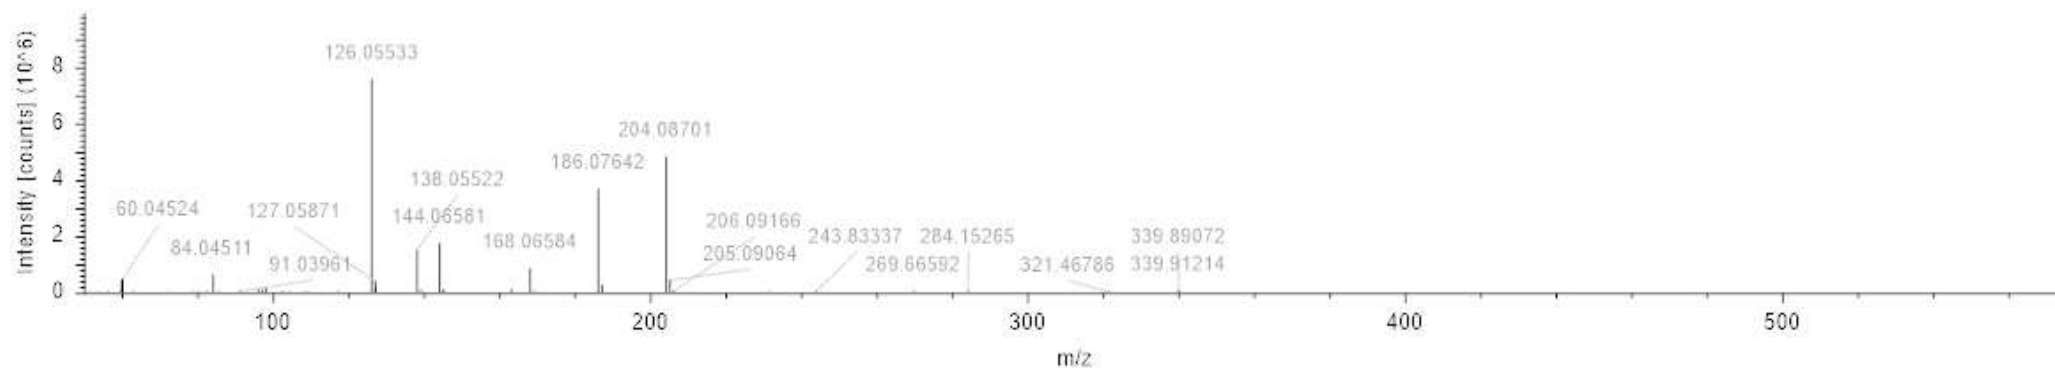





| Structure | Name | RT [min] | Formula | Calc. MW  | Areas  |
|-----------|------|----------|---------|-----------|--------|
| n/a       |      | 40.71    | n/a     | 545.19601 | 9.73e7 |

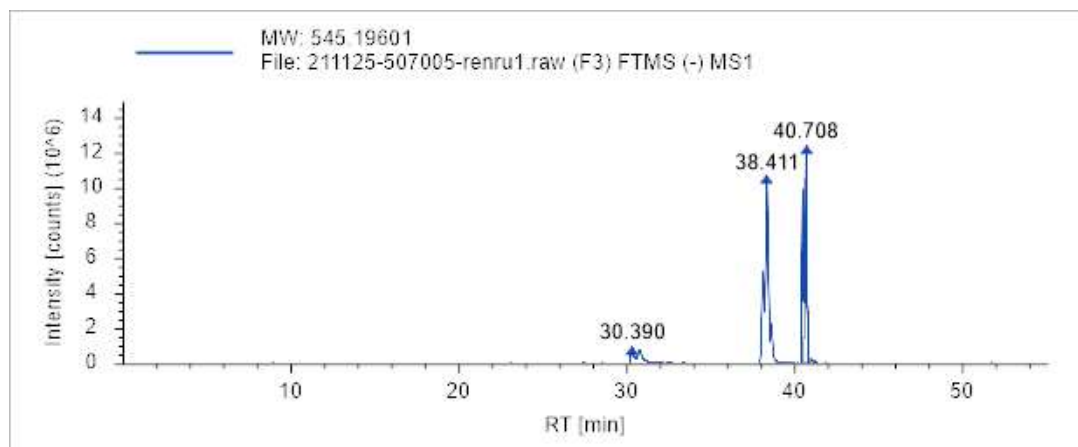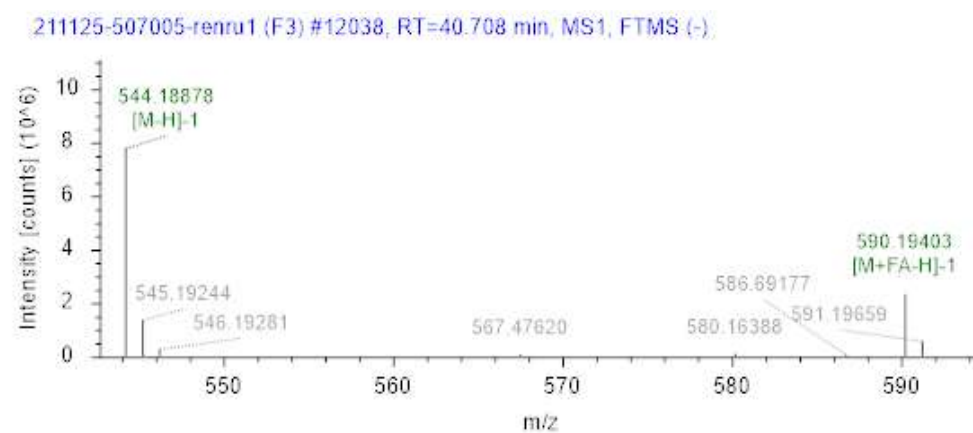

211125-507005-renru1 (F3) #12018, RT=40.658 min, MS2, FTMS (-), (HCD, DDA, 544.1887@30, -1)

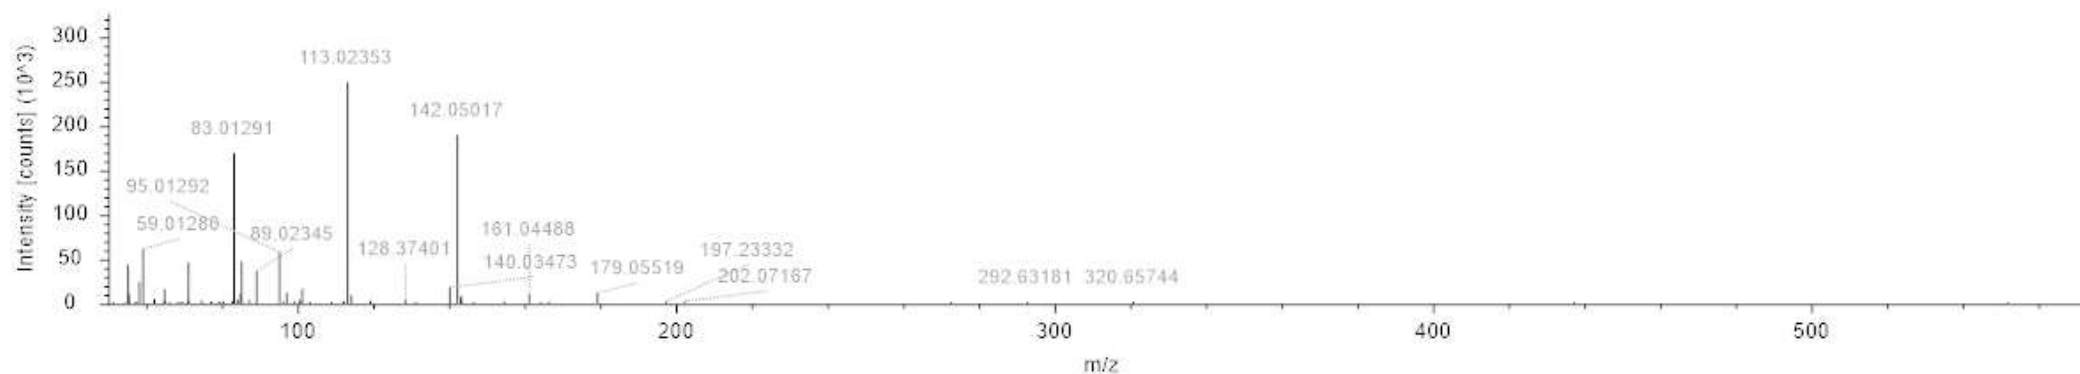



| Structure | Name | RT [min] | Formula | Calc. MW  | Areas                    |
|-----------|------|----------|---------|-----------|--------------------------|
| n/a       |      | 24.13    | n/a     | 666.21960 | 2.18e9   5.18e9   4.29e9 |

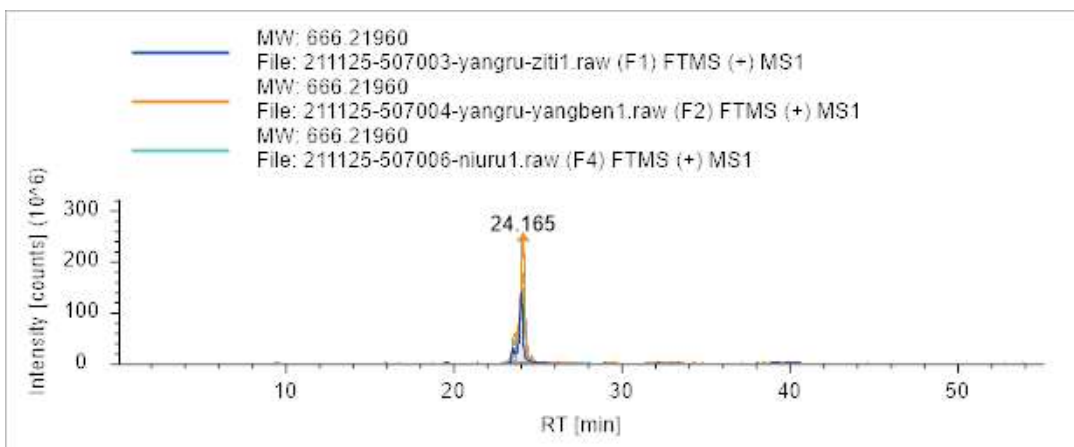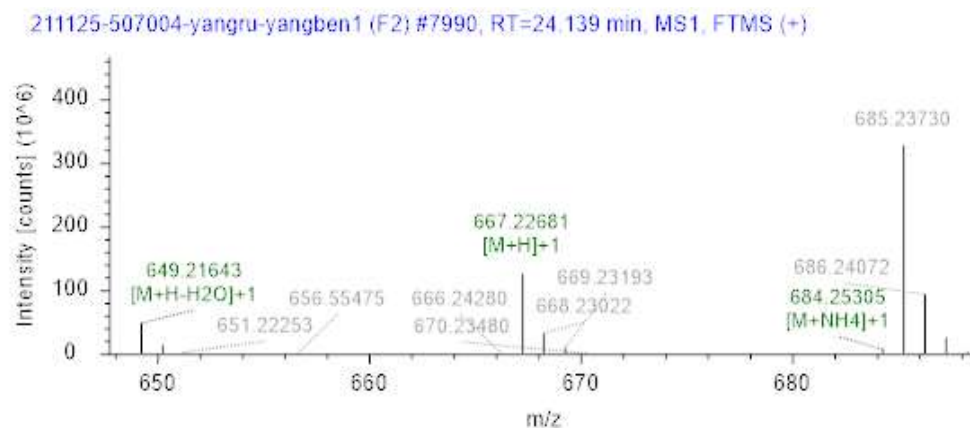

211125-507004-yangru-yangben1 (F2) #7979, RT=24.114 min, MS2, FTMS (+), (HCD, DDA, 667.2277@30, +1)

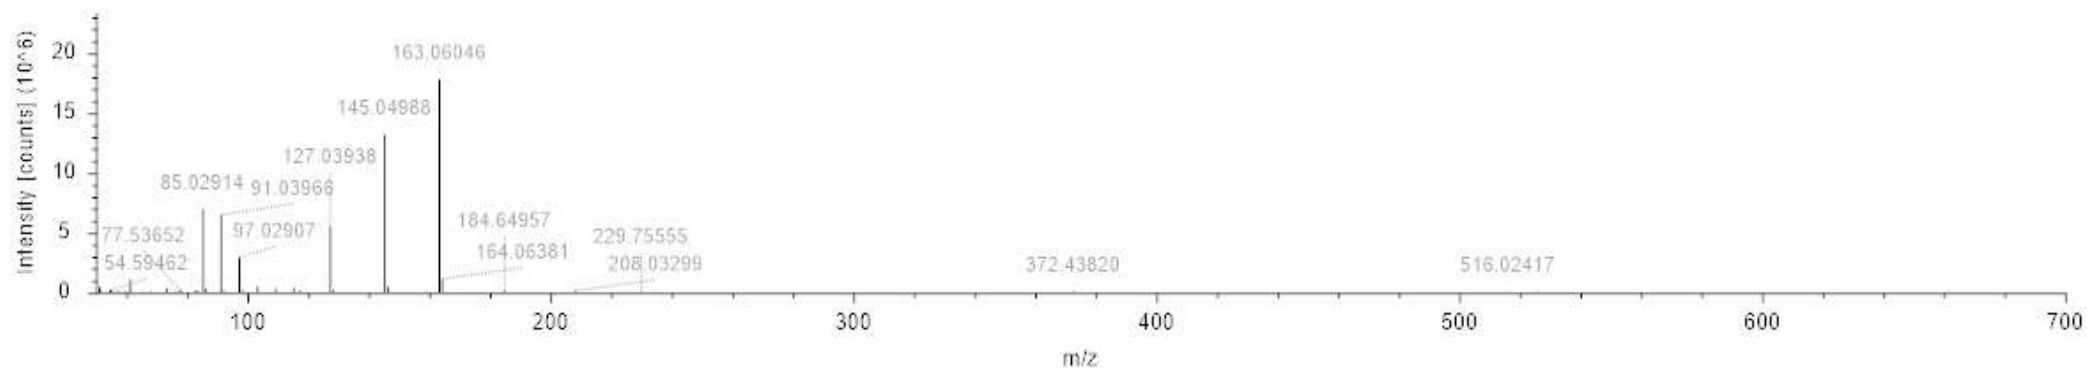



| Structure | Name | RT [min] | Formula | Calc. MW  | Areas  |
|-----------|------|----------|---------|-----------|--------|
| n/a       |      | 29.24    | n/a     | 668.23787 | 9.63e7 |

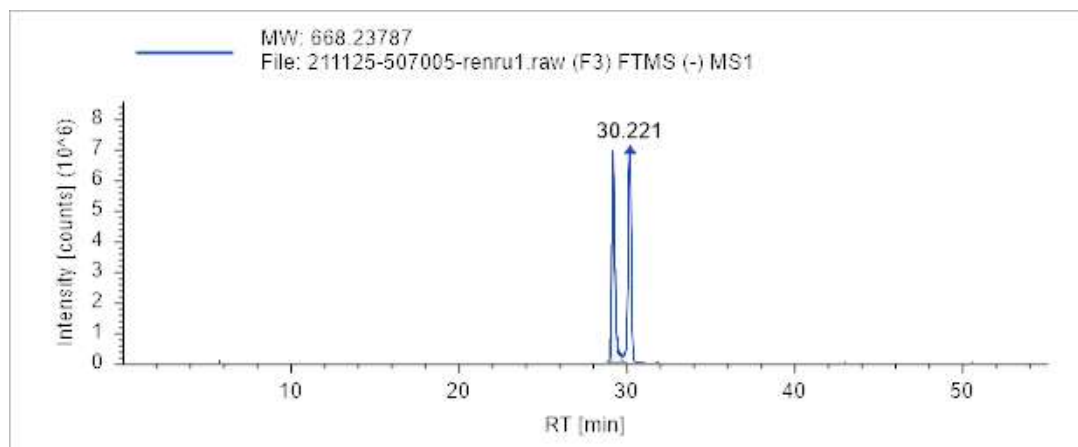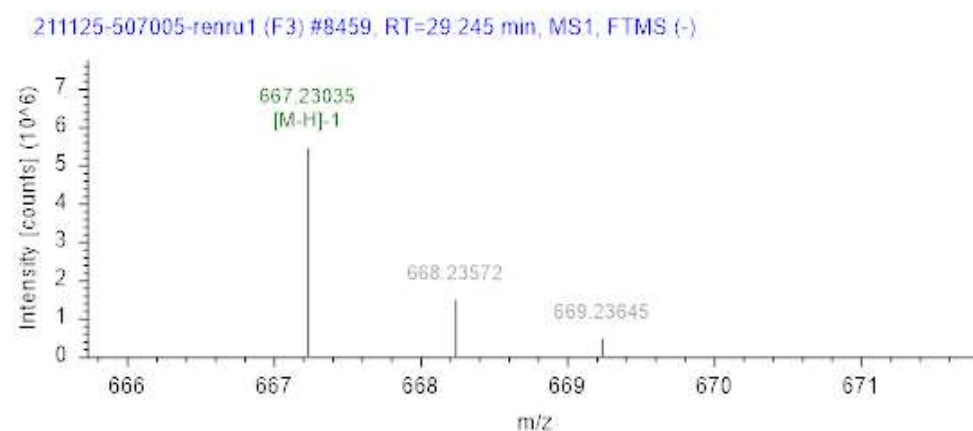

211125-507005-renru1 (F3) #8497, RT=29.333 min, MS2, FTMS (-), (HCD, DDA, 867.2297@30, -1)

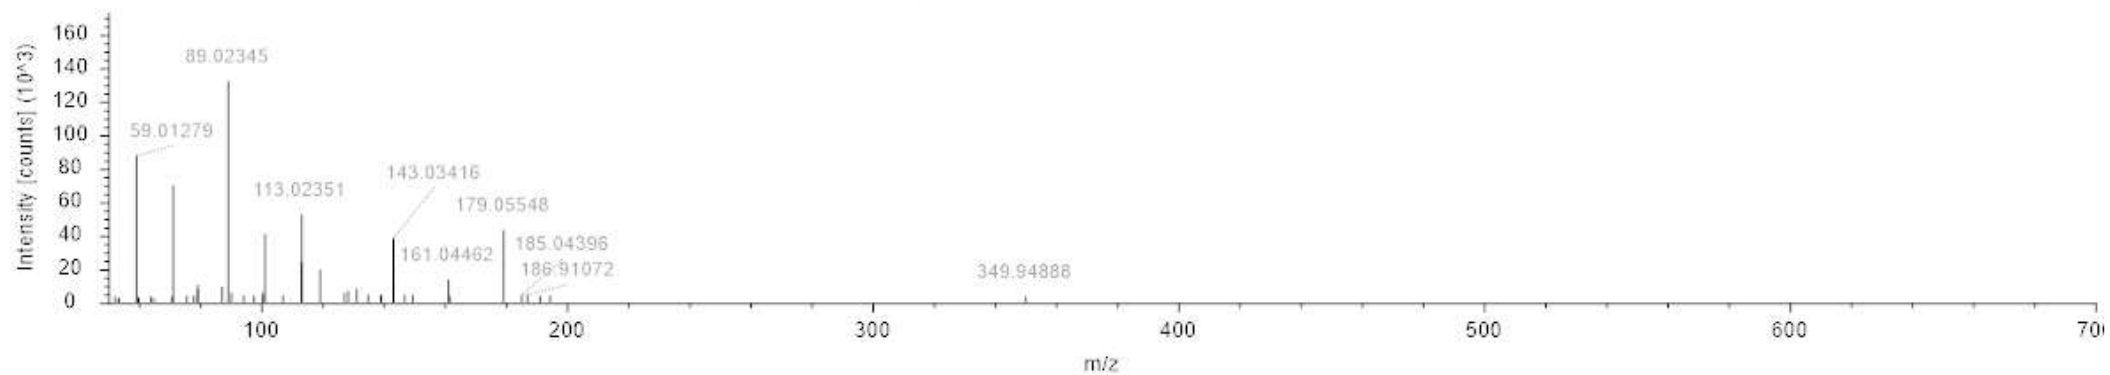



| Structure | Name | RT [min] | Formula | Calc. MW  | Areas  |
|-----------|------|----------|---------|-----------|--------|
| n/a       |      | 40.95    | n/a     | 691.25234 | 3.11e8 |

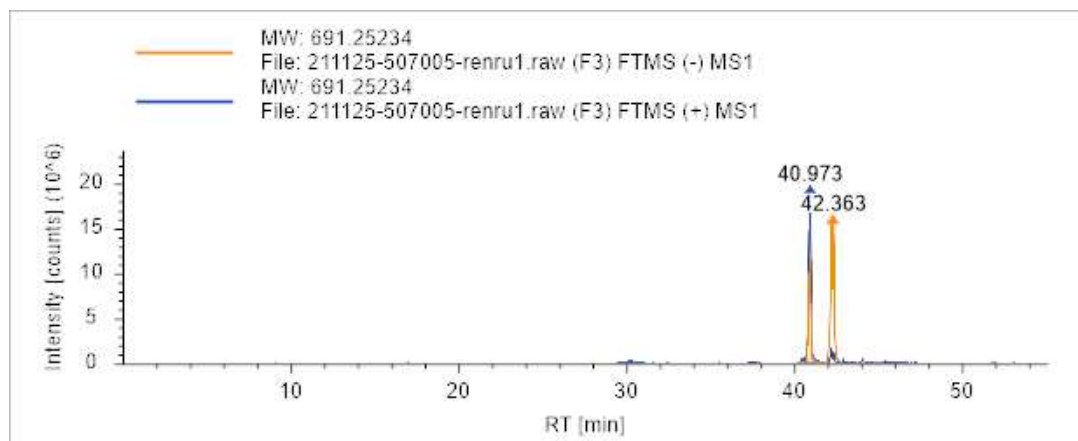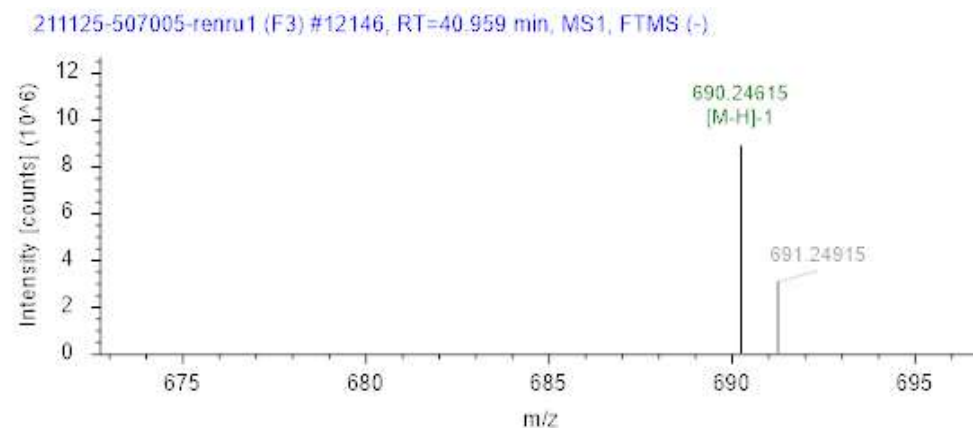

211125-507005-renru1 (F3) #12160, RT=40.991 min, MS2, FTMS (-), (HCD, DDA, 690.2462@30, -1)

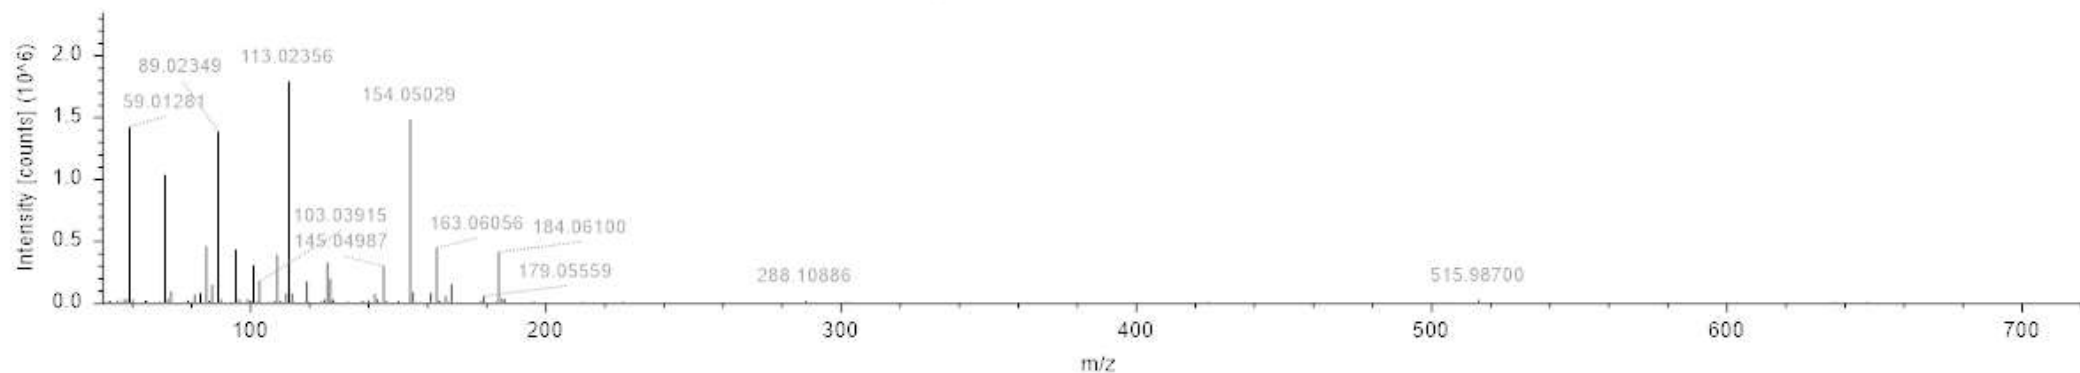



| Structure | Name | RT [min] | Formula | Calc. MW  | Areas  |
|-----------|------|----------|---------|-----------|--------|
| n/a       |      | 42.29    | n/a     | 691.25406 | 3.15e8 |

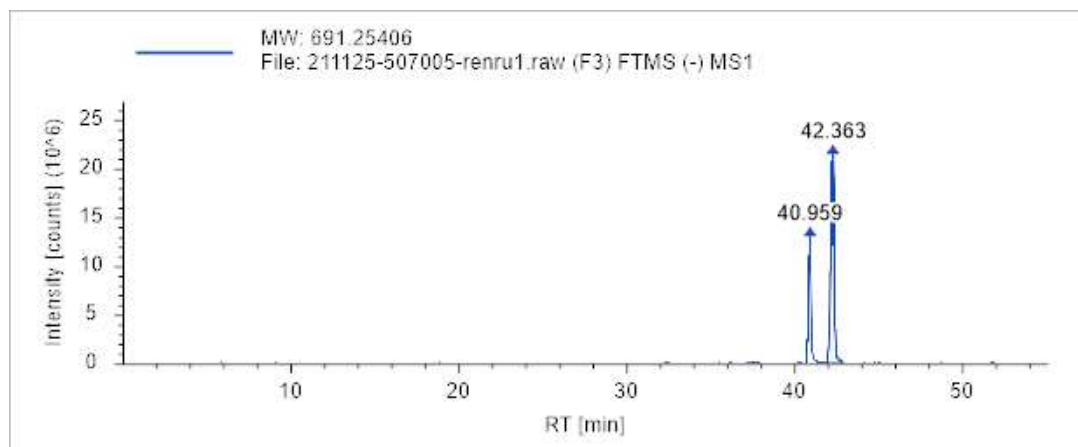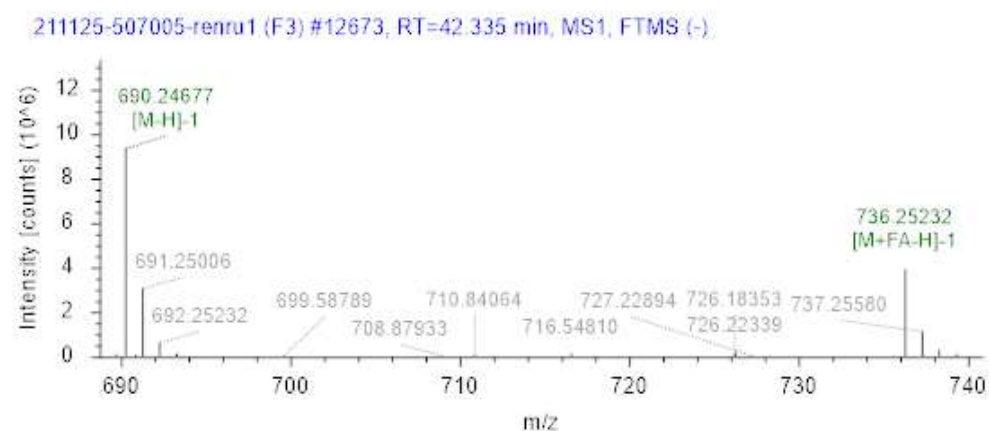

211125-507005-renru1 (F3) #12643, RT=42.257 min, MS2, FTMS (-), (HCD, DDA, 690.2467@30, -1)

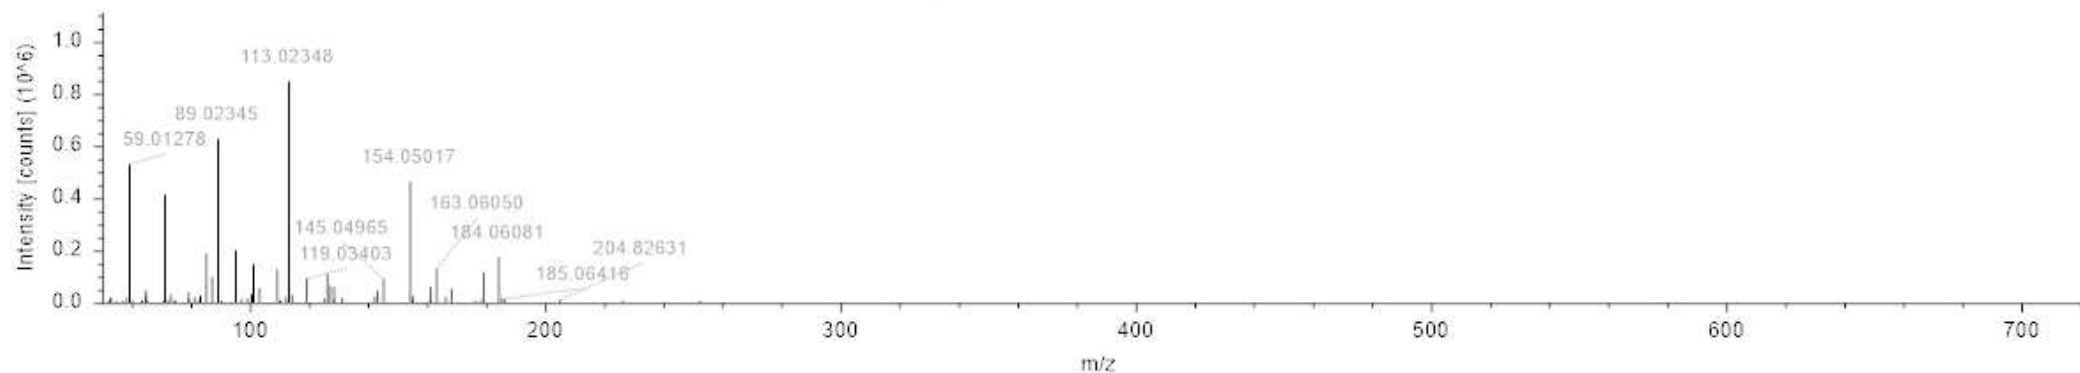



| Structure | Name | RT [min] | Formula | Calc. MW  | Areas  |
|-----------|------|----------|---------|-----------|--------|
| n/a       |      | 26.53    | n/a     | 692.24687 | 9.71e6 |

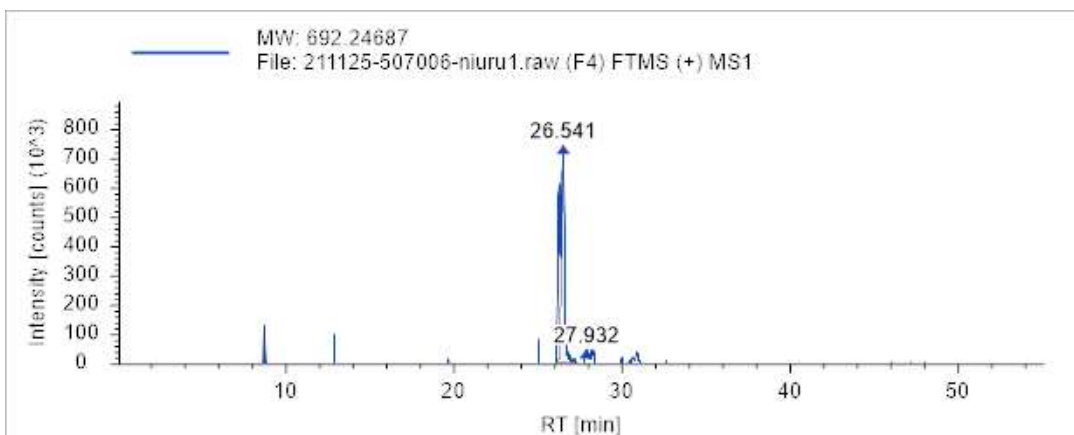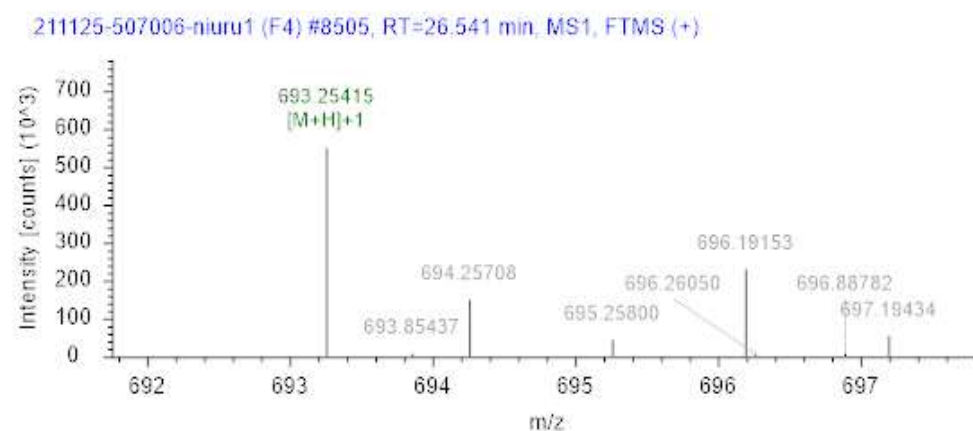

211125-507006-niuru1 (F4) #8520, RT=26.589 min, MS2, FTMS (+), (HCD, DDA, 693.2546@30, +1).

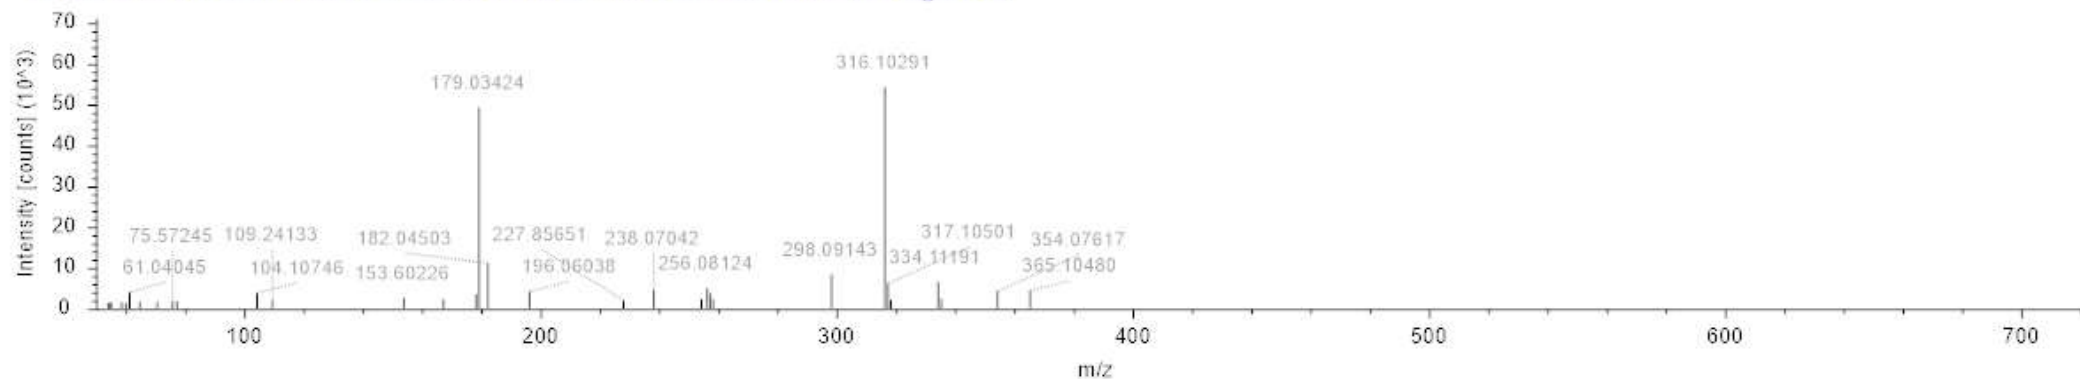





| Structure | Name | RT [min] | Formula | Calc. MW  | Areas  |
|-----------|------|----------|---------|-----------|--------|
| n/a       |      | 44.44    | n/a     | 707.24614 | 2.92e7 |

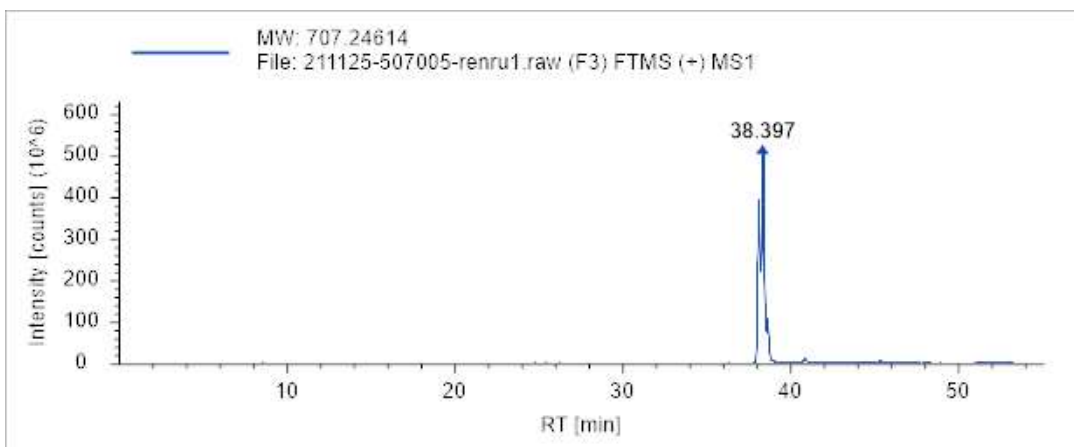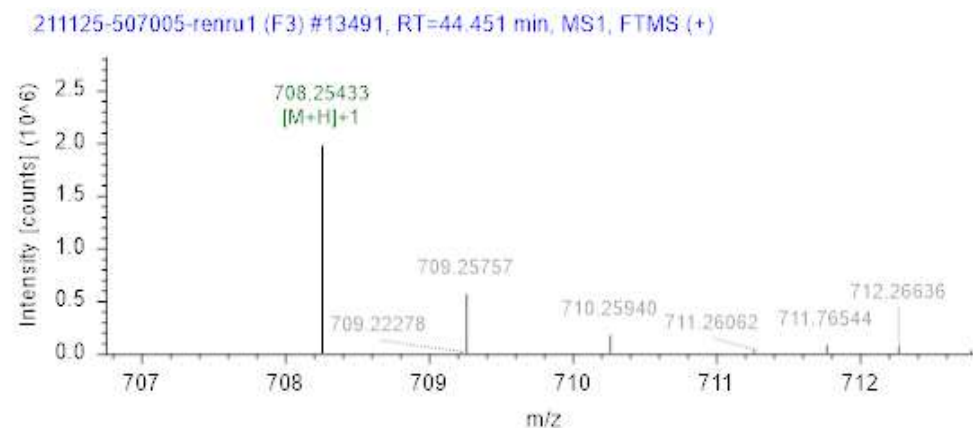

211125-507005-renru1 (F3) #13456, RT=44.365 min, MS2, FTMS (+), (HCD, DDA, 708.2537@30, +1)

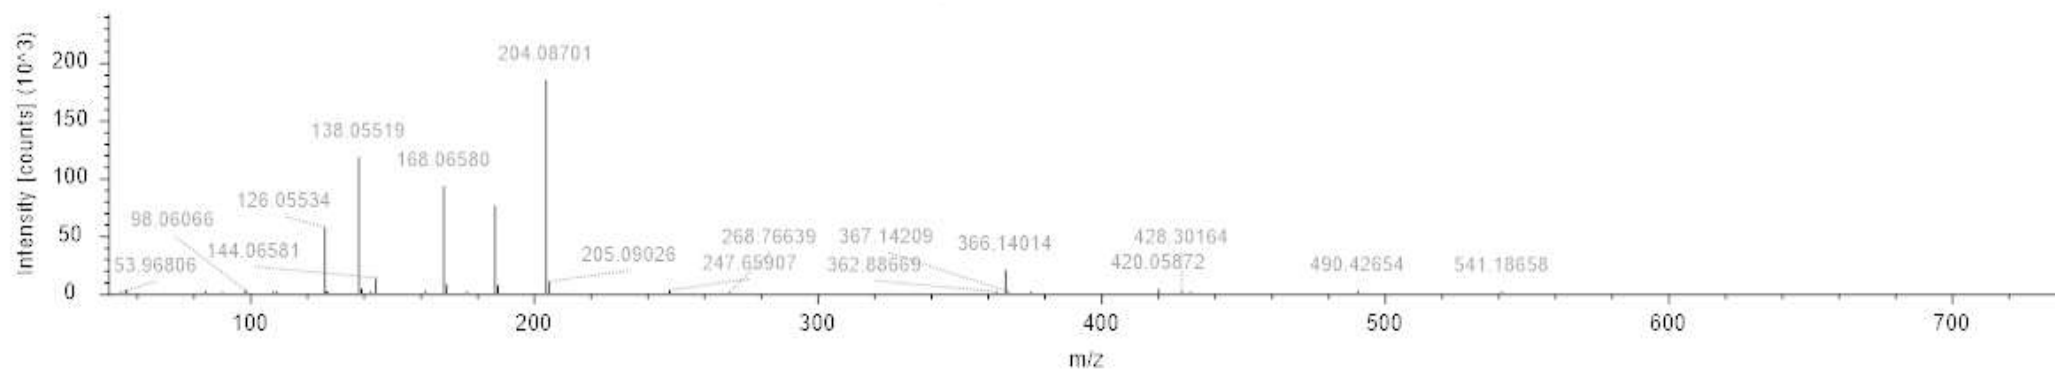



| Structure | Name | RT [min] | Formula | Calc. MW  | Areas  |
|-----------|------|----------|---------|-----------|--------|
| n/a       |      | 38.15    | n/a     | 707.24614 | 2.75e9 |

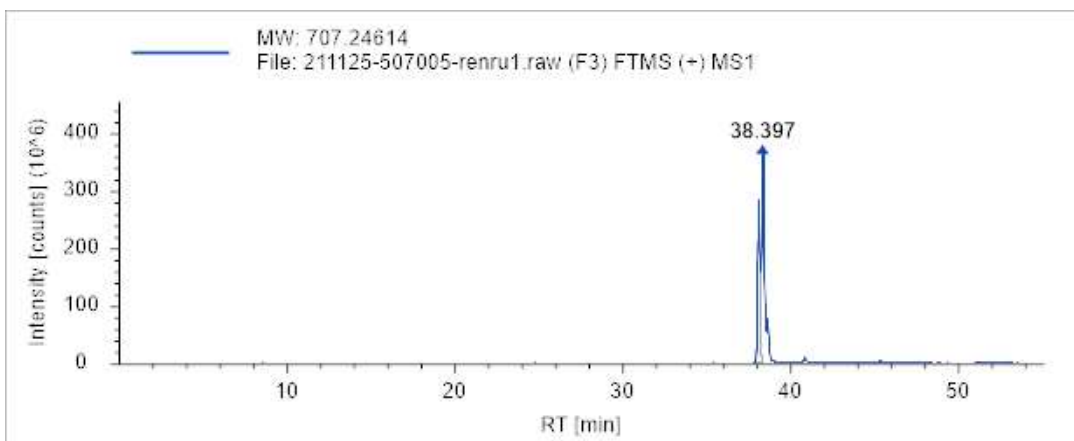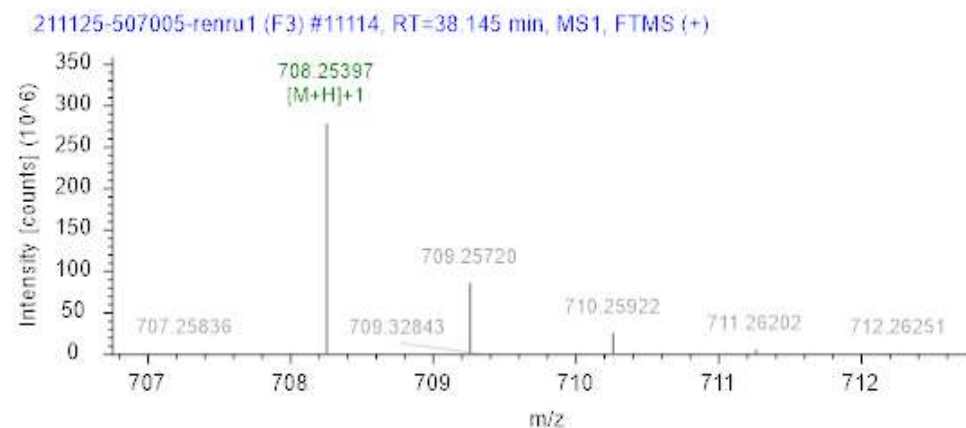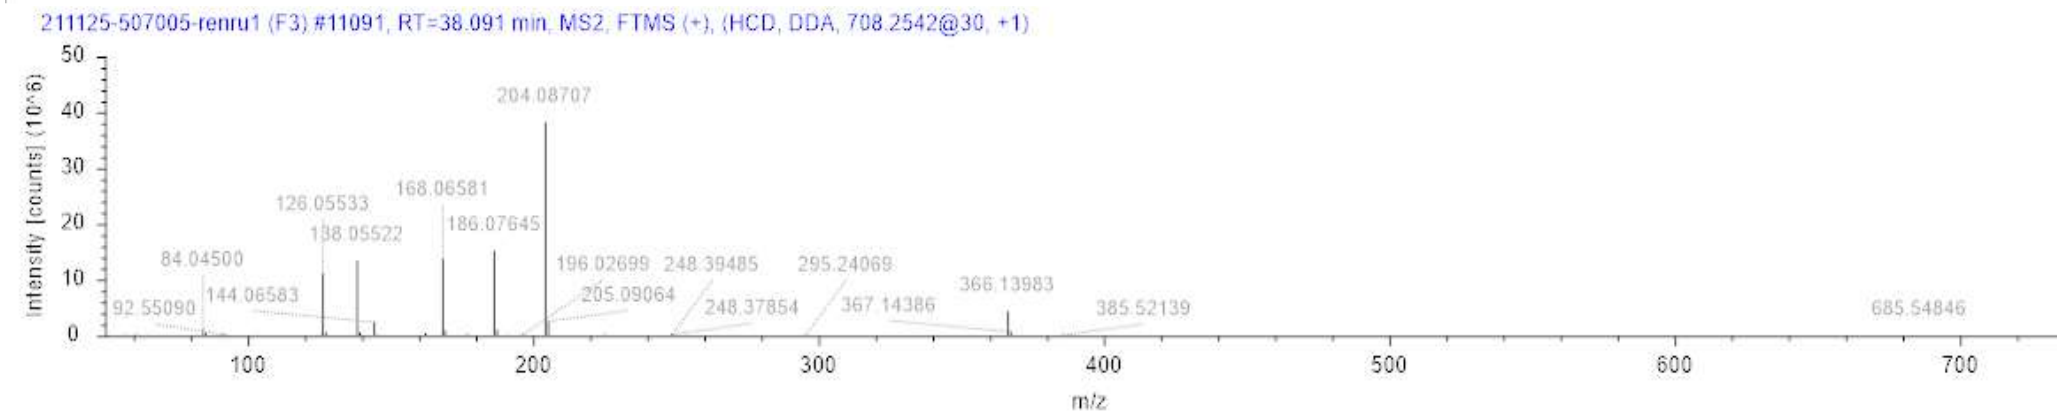



| Structure | Name | RT [min] | Formula | Calc. MW  | Areas  |
|-----------|------|----------|---------|-----------|--------|
| n/a       |      | 40.90    | n/a     | 707.24614 | 1.53e8 |

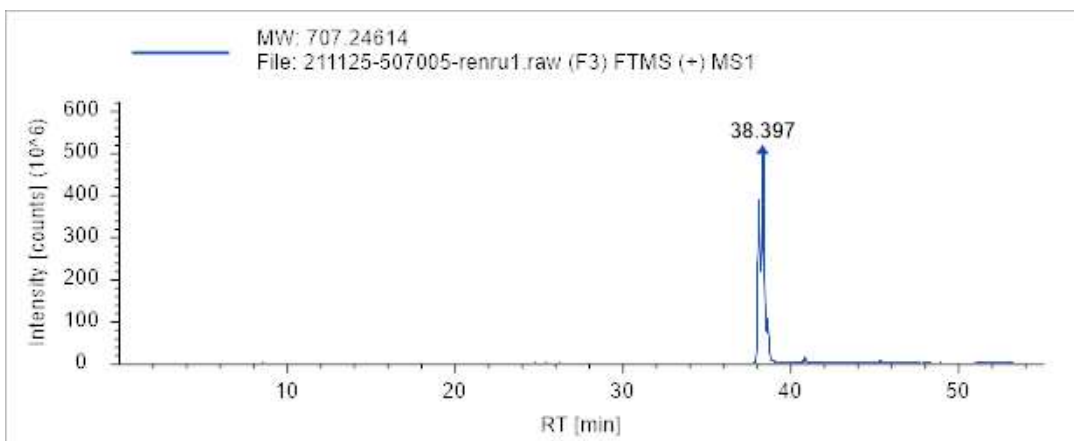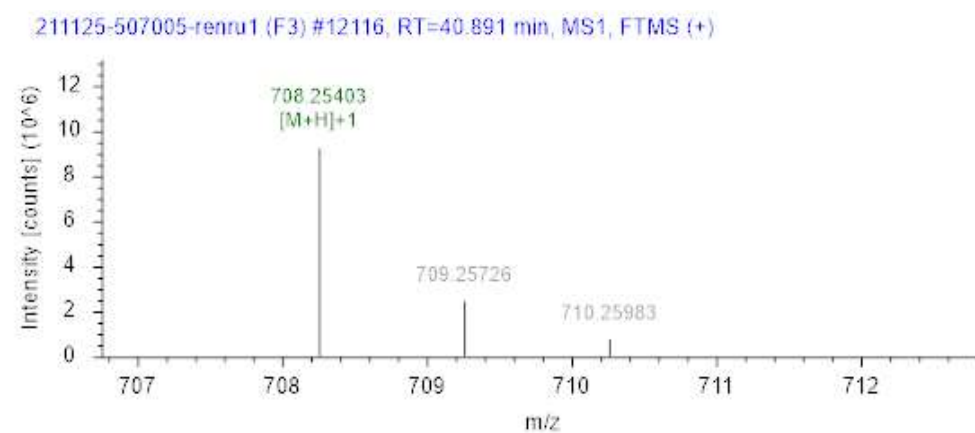

211125-507005-renru1 (F3) #12093, RT=40.838 min, MS2, FTMS (+), (HCD, DDA, 708.2541@30, +1)

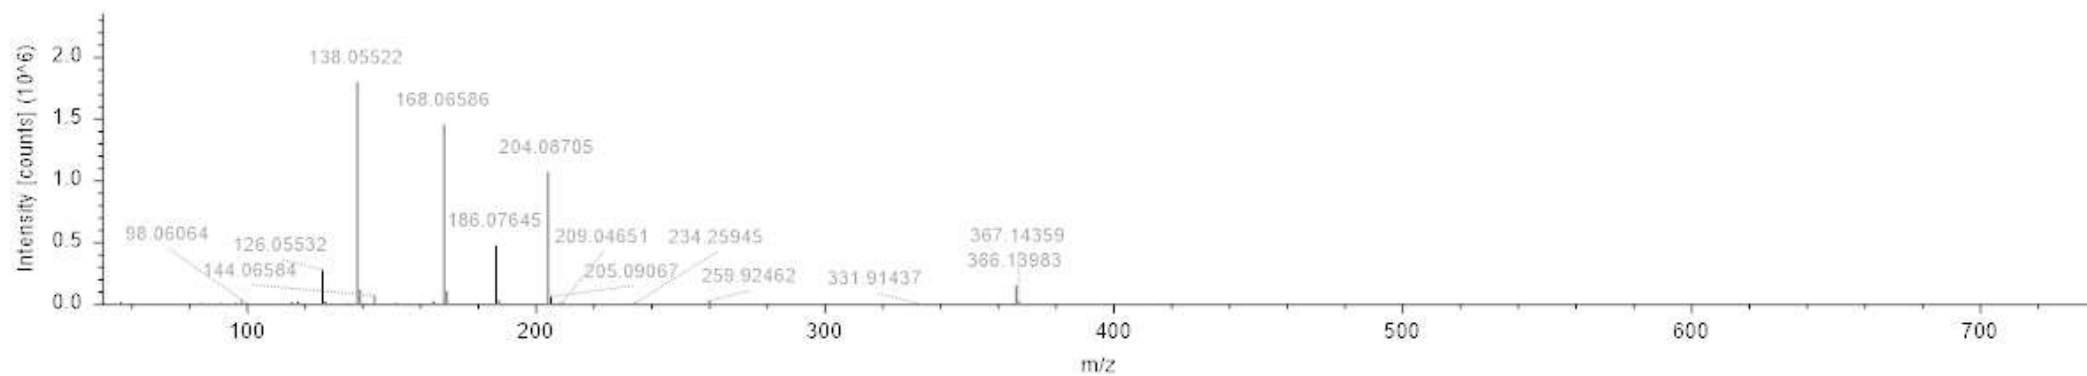



| Structure | Name | RT [min] | Formula | Calc. MW  | Areas  |
|-----------|------|----------|---------|-----------|--------|
| n/a       |      | 45.41    | n/a     | 707.24614 | 4.86e7 |

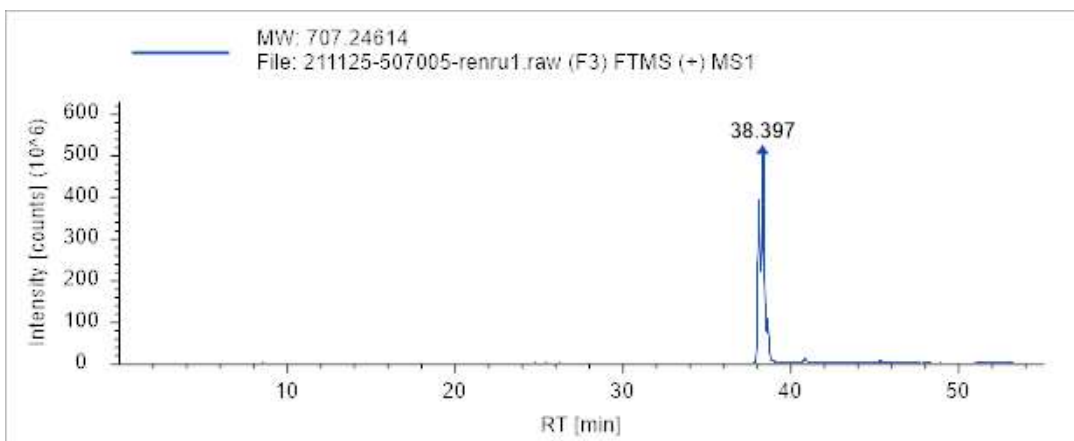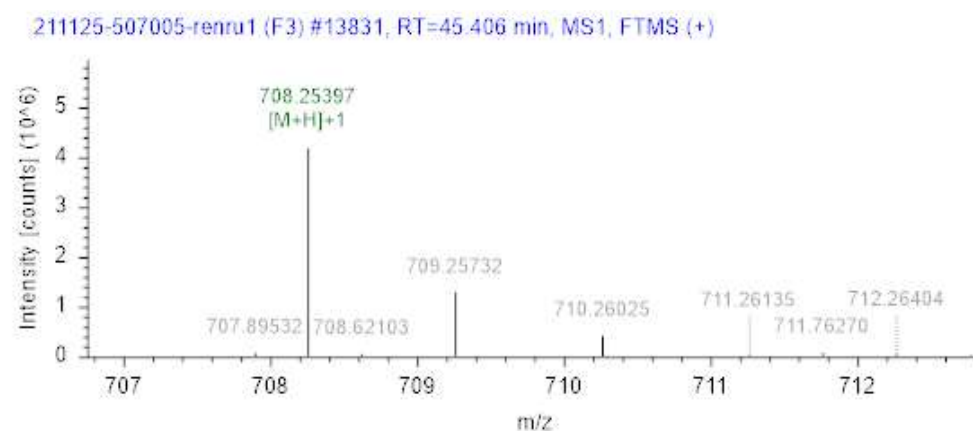

211125-507005-renru1 (F3) #13832, RT=45.409 min, MS2, FTMS (+), (HCD, DDA, 708.2535@30, +1)

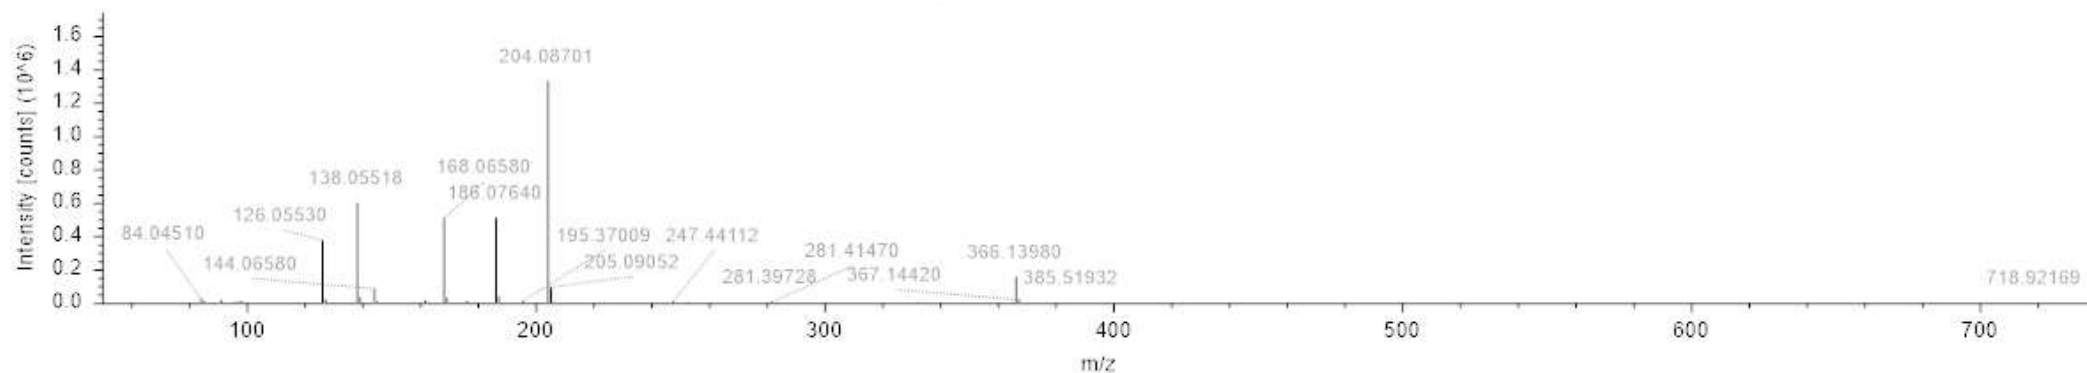



| Structure | Name | RT [min] | Formula | Calc. MW  | Areas  |
|-----------|------|----------|---------|-----------|--------|
| n/a       |      | 42.01    | n/a     | 707.24614 | 1.45e7 |

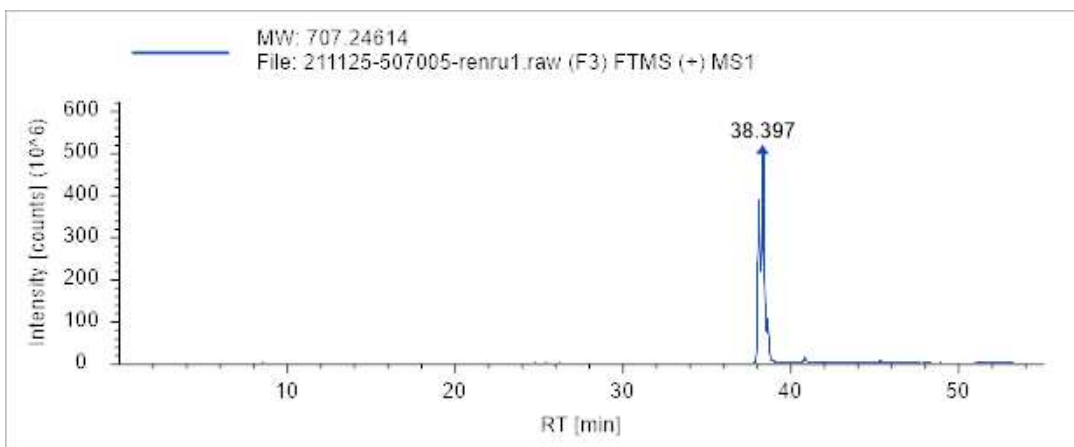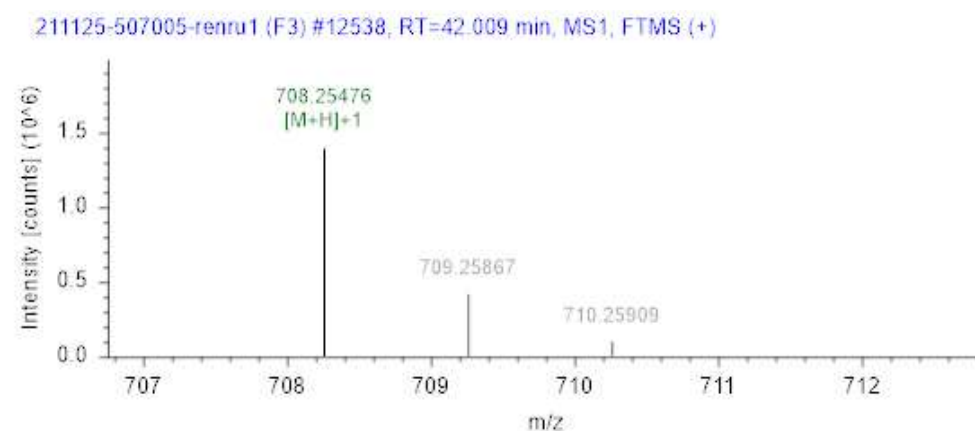

211125-507005-renru1 (F3) #12510, RT=41.933 min, MS2, FTMS (+), (HCD, DDA, 708.2551@30, +1)

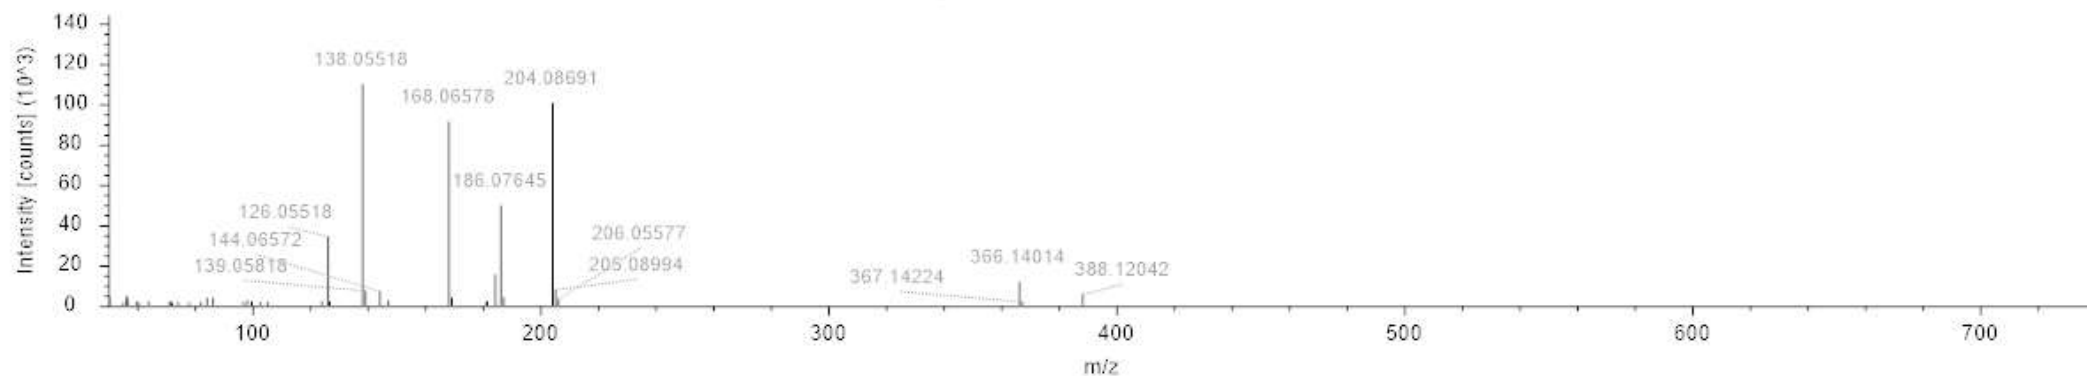



| Structure | Name | RT [min] | Formula | Calc. MW  | Areas  |
|-----------|------|----------|---------|-----------|--------|
| n/a       |      | 42.96    | n/a     | 707.24614 | 1.44e7 |

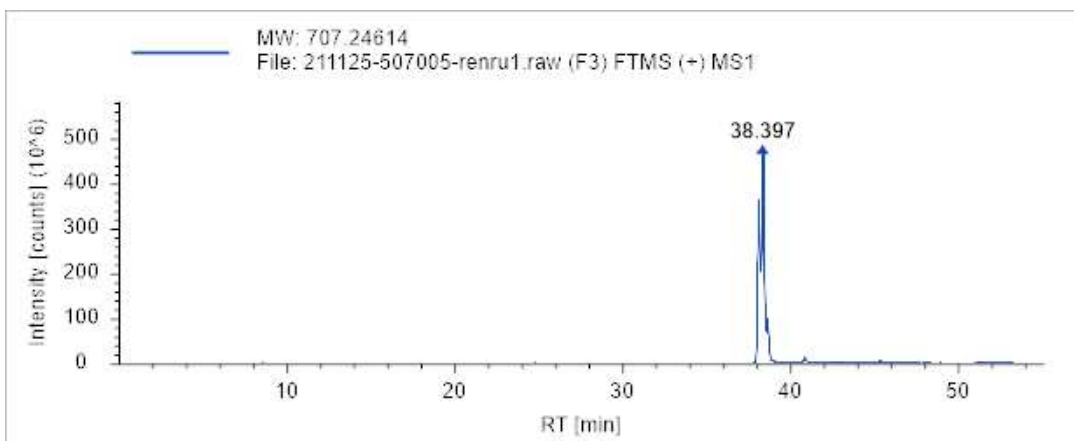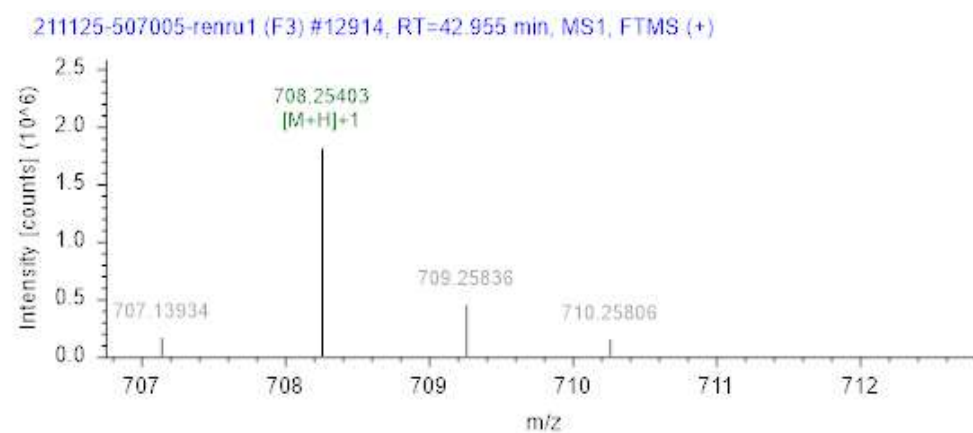

211125-507005-renru1 (F3) #12894, RT=42.906 min, MS2, FTMS (+), (HCD, DDA, 708.2541@30, +1)

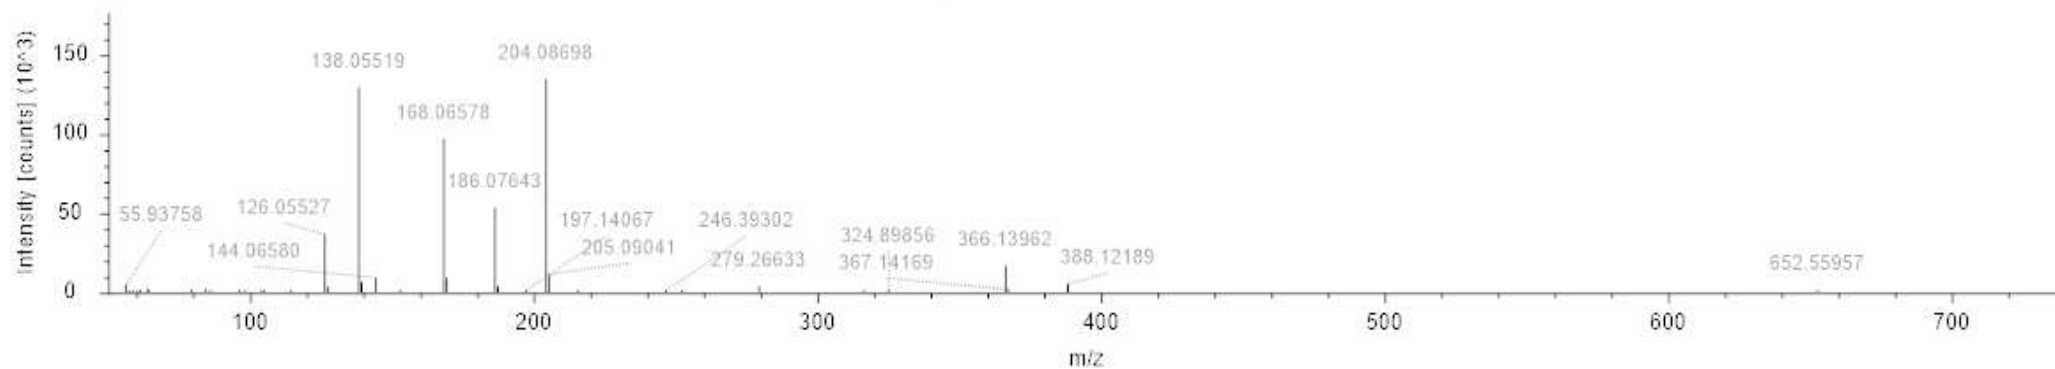



| Structure | Name | RT [min] | Formula | Calc. MW  | Areas  |
|-----------|------|----------|---------|-----------|--------|
| n/a       |      | 38.68    | n/a     | 707.24625 | 1.53e9 |

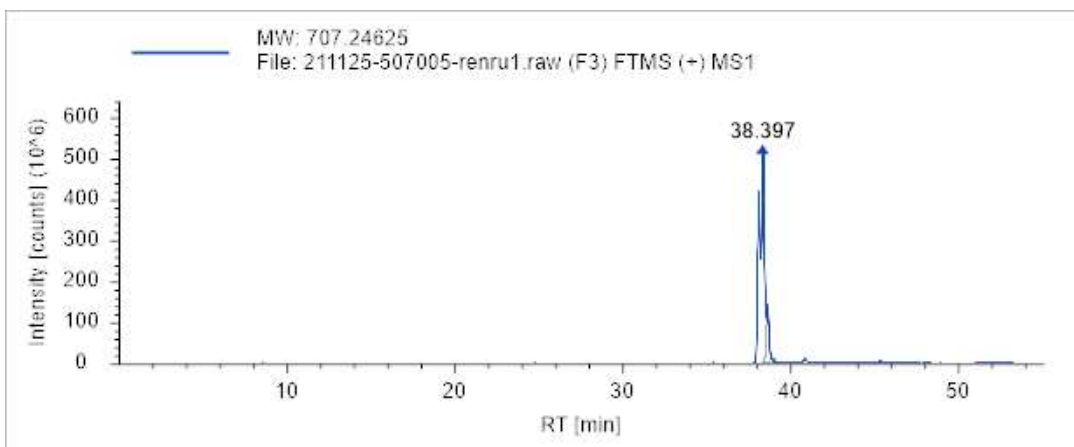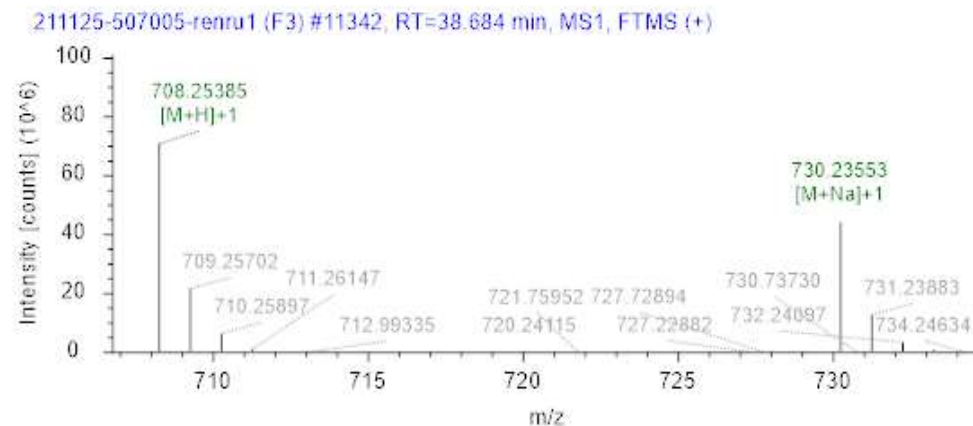

211125-507005-renru1 (F3) #11343, RT=38.686 min, MS2, FTMS (+), (HCD, DDA, 708.2543@30, +1)

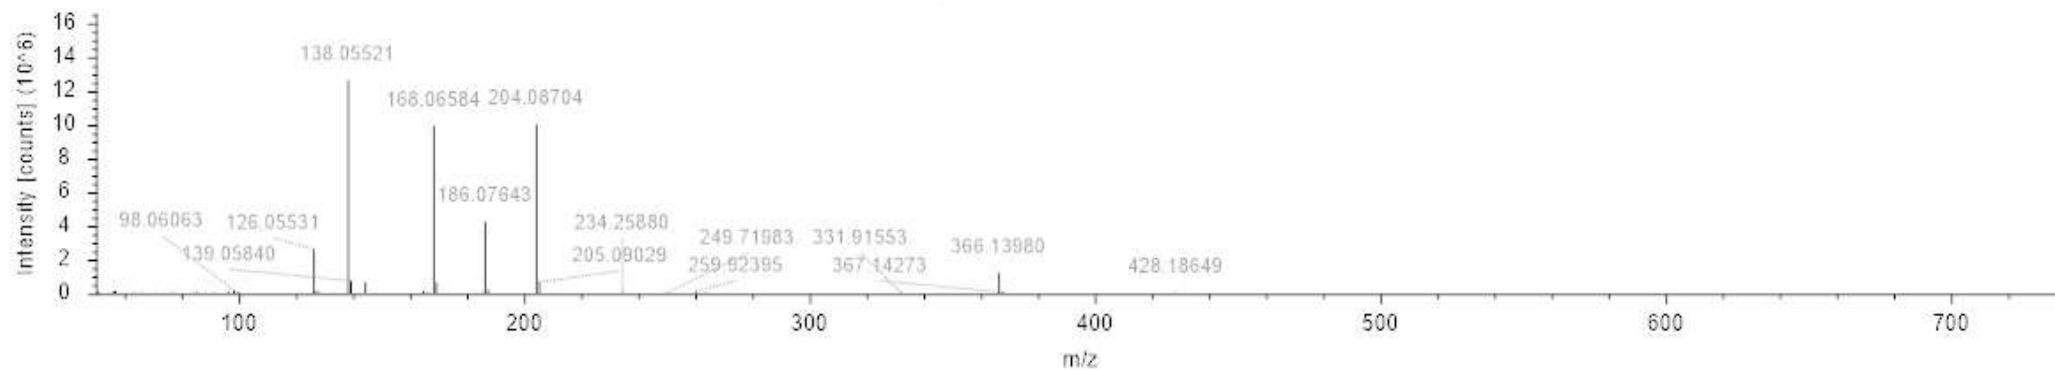





| Structure | Name | RT [min] | Formula | Calc. MW  | Areas  |
|-----------|------|----------|---------|-----------|--------|
| n/a       |      | 40.52    | n/a     | 853.30419 | 1.93e8 |

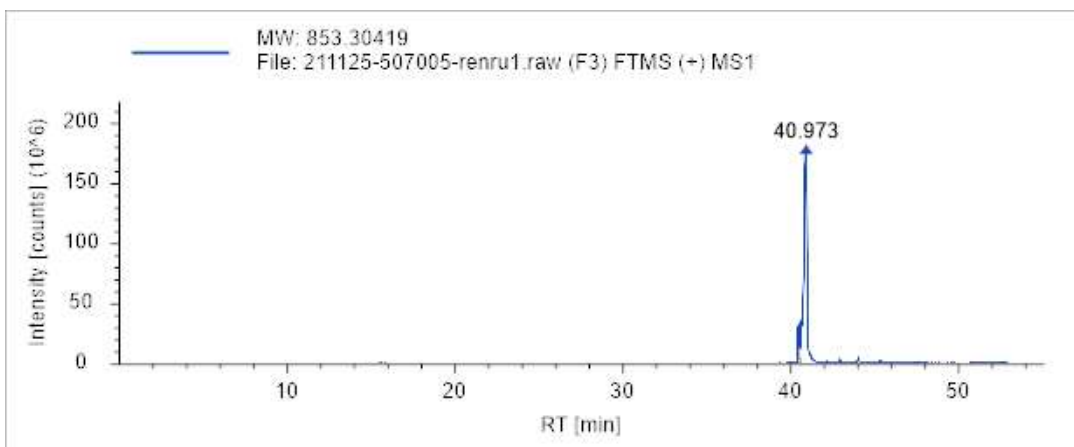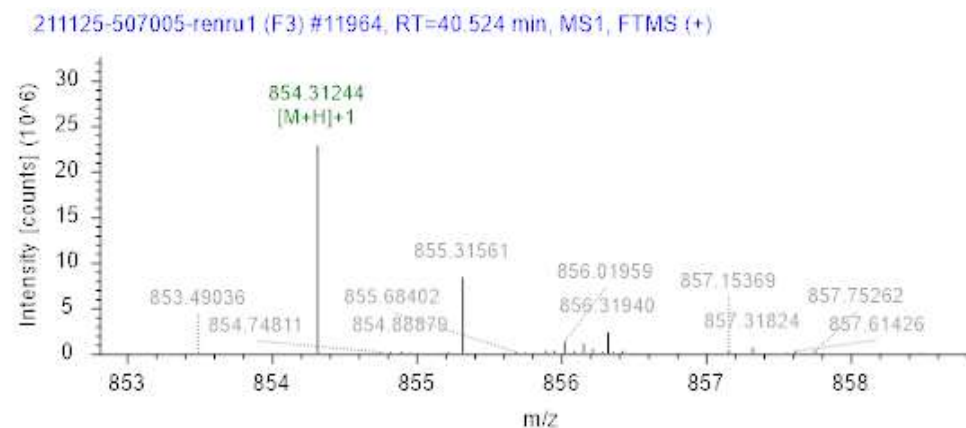

211125-507005-renru1 (F3) #11969, RT=40.532 min, MS2, FTMS (+), (HCD, DDA, 856.0196@30, +1)

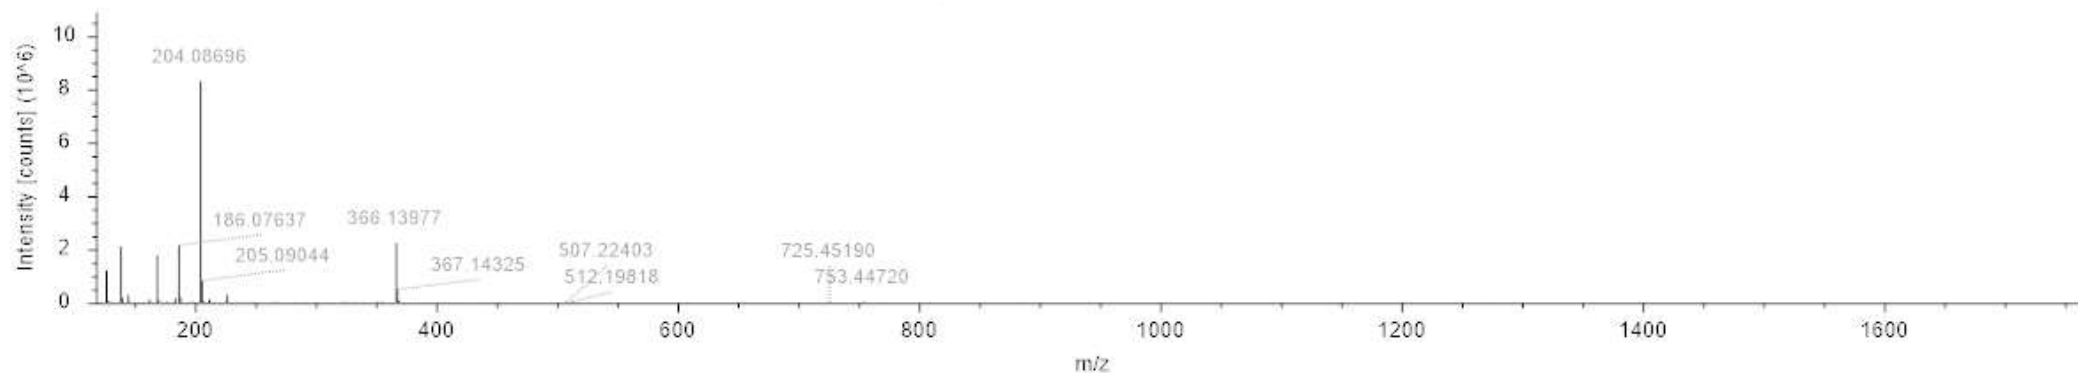



| Structure | Name | RT [min] | Formula | Calc. MW  | Areas  |
|-----------|------|----------|---------|-----------|--------|
| n/a       |      | 45.38    | n/a     | 853.30419 | 2.22e7 |

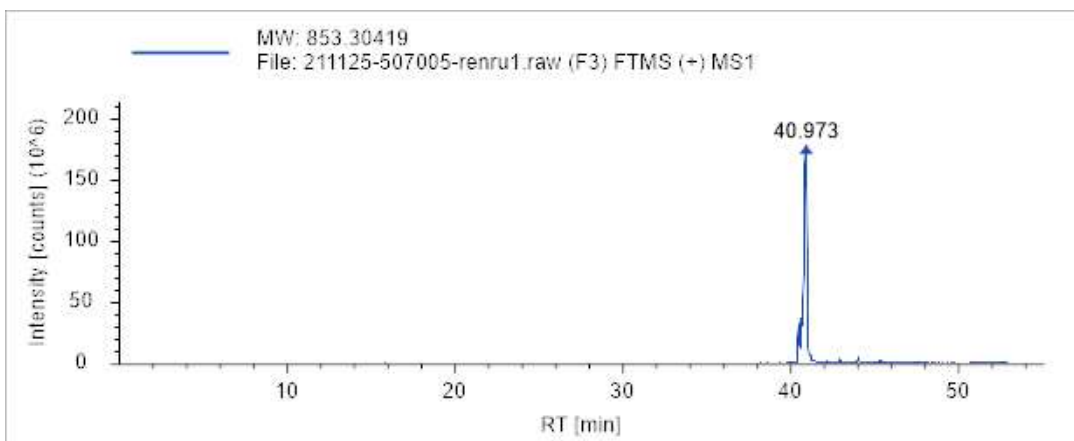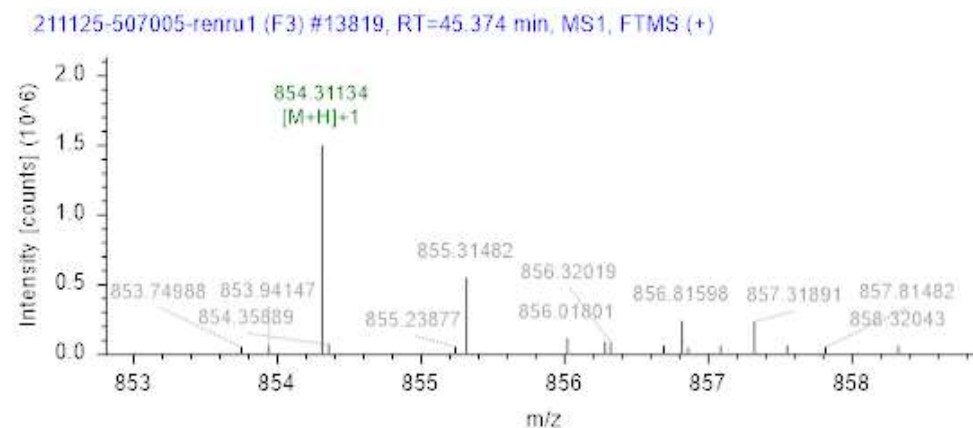

211125-507005-renru1 (F3) #13858, RT=45.473 min, MS2, FTMS (+), (HCD, DDA, 854.3126@30, +1)

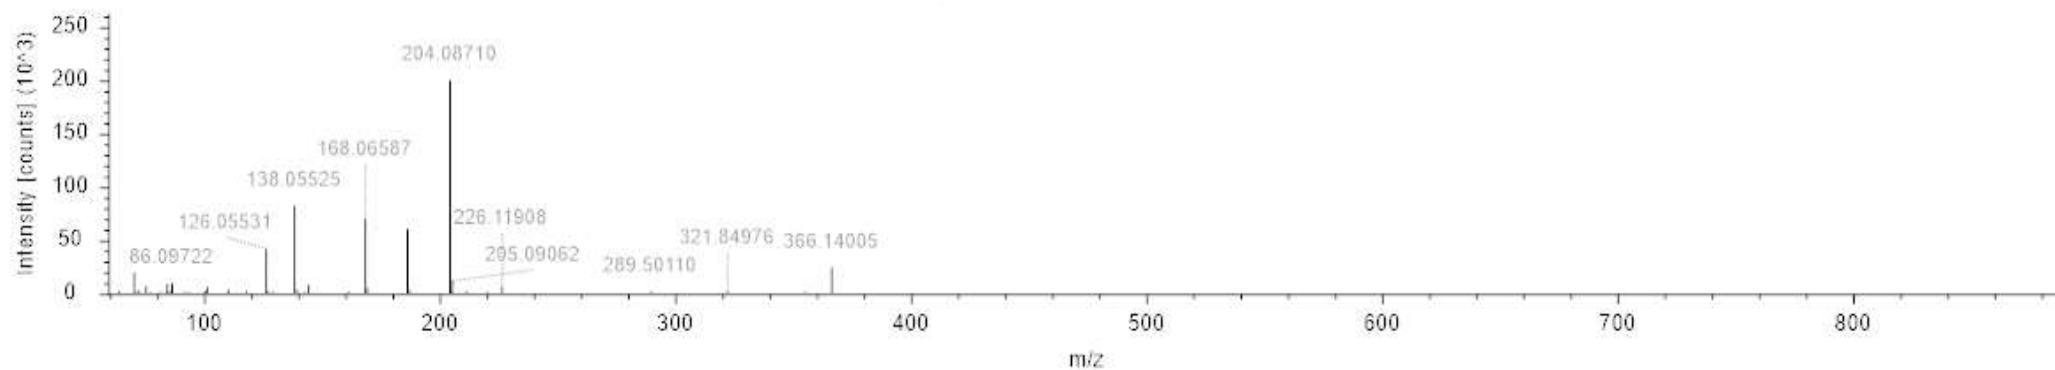



| Structure | Name | RT [min] | Formula | Calc. MW  | Areas  |
|-----------|------|----------|---------|-----------|--------|
| n/a       |      | 46.28    | n/a     | 853.30419 | 1.77e7 |

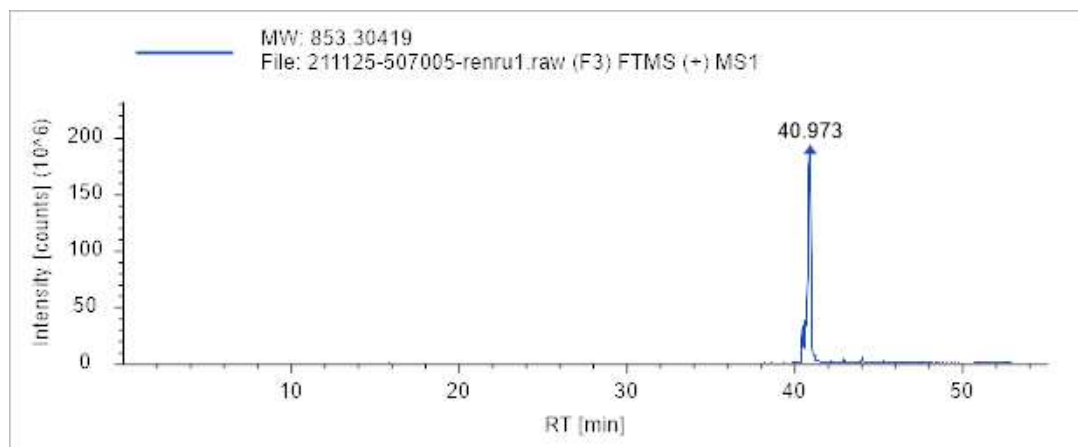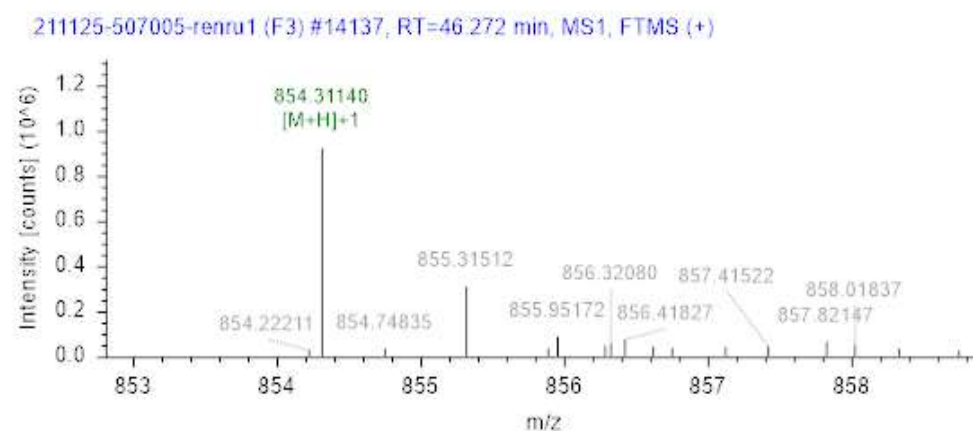

211125-507005-renru1 (F3) #14162, RT=46.341 min, MS2, FTMS (+), (HCD, DDA, 854.3110@30, +1)

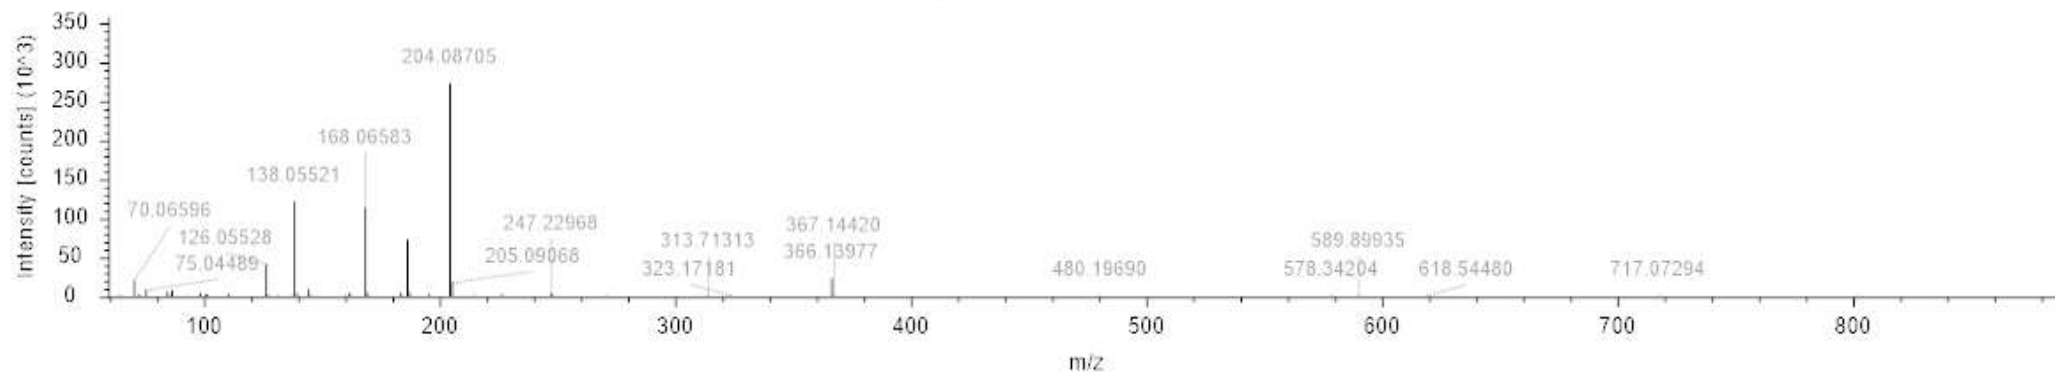



| Structure | Name | RT [min] | Formula | Calc. MW  | Areas  |
|-----------|------|----------|---------|-----------|--------|
| n/a       |      | 44.44    | n/a     | 853.30419 | 1.28e7 |

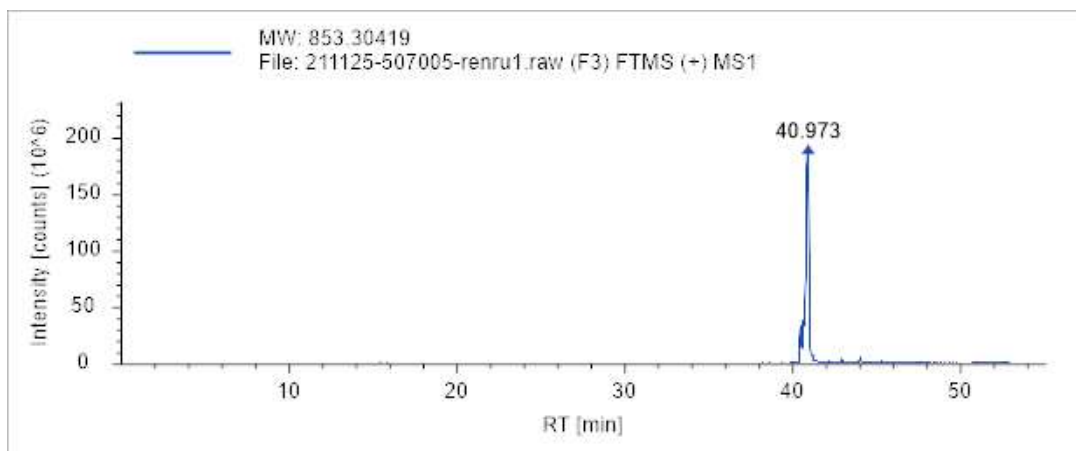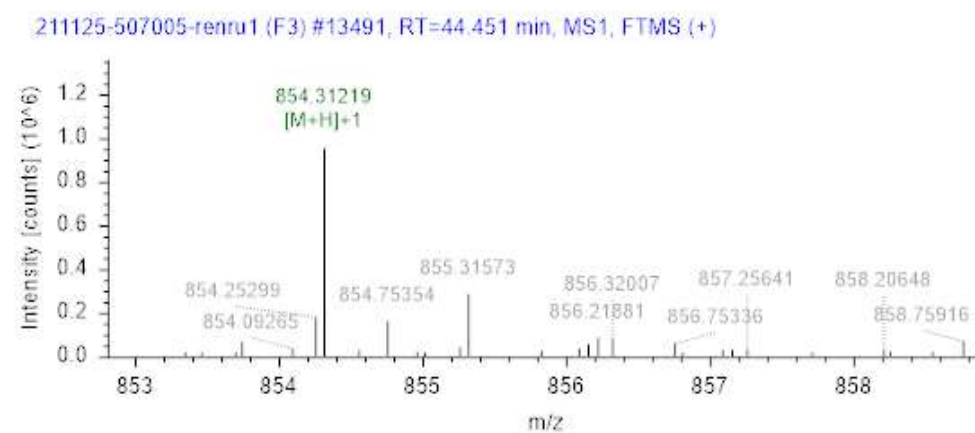



| Structure | Name | RT [min] | Formula | Calc. MW  | Areas  |
|-----------|------|----------|---------|-----------|--------|
| n/a       |      | 41.23    | n/a     | 869.30156 | 6.83e7 |

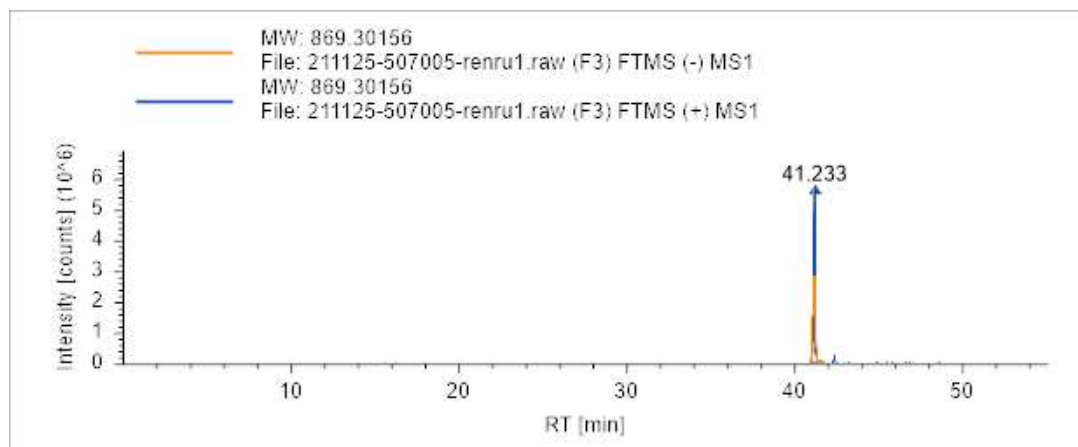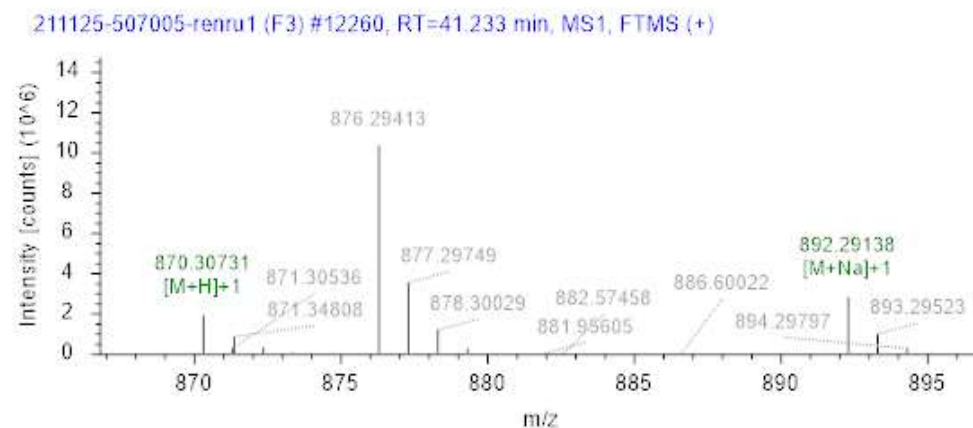

211125-507005-renru1 (F3) #12290, RT=41.308 min, MS2, FTMS (-), (HCD, DDA, 868.2944@30, -1)

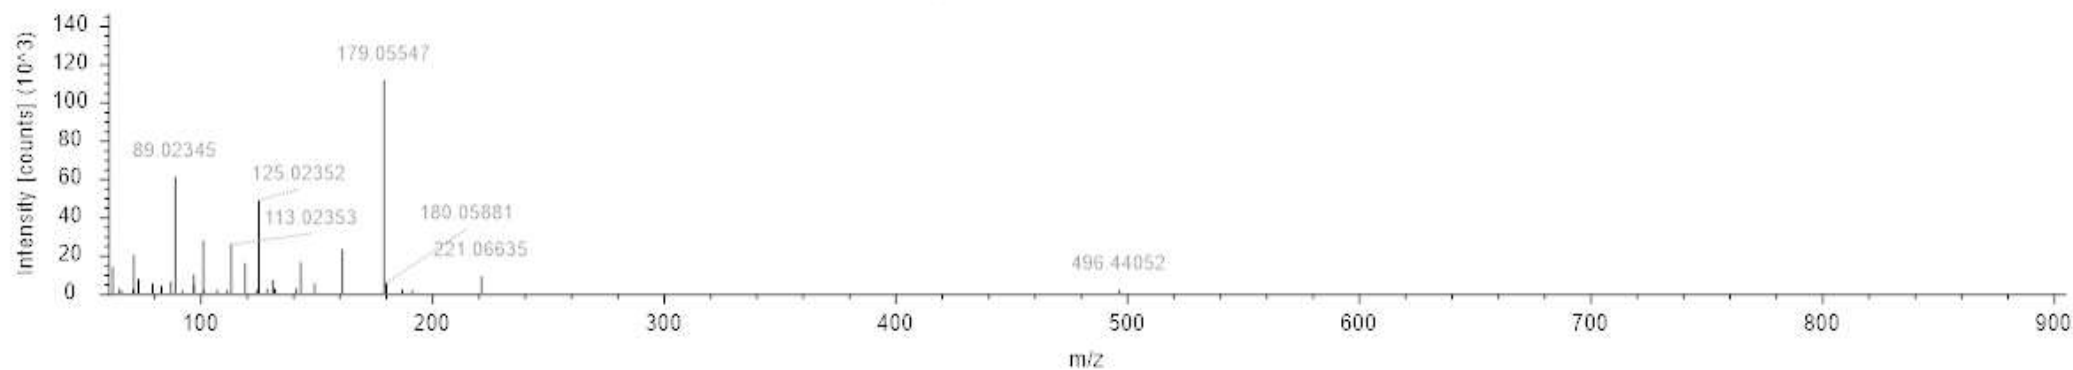



| Structure | Name | RT [min] | Formula | Calc. MW  | Areas  |
|-----------|------|----------|---------|-----------|--------|
| n/a       |      | 40.54    | n/a     | 910.32720 | 3.05e7 |

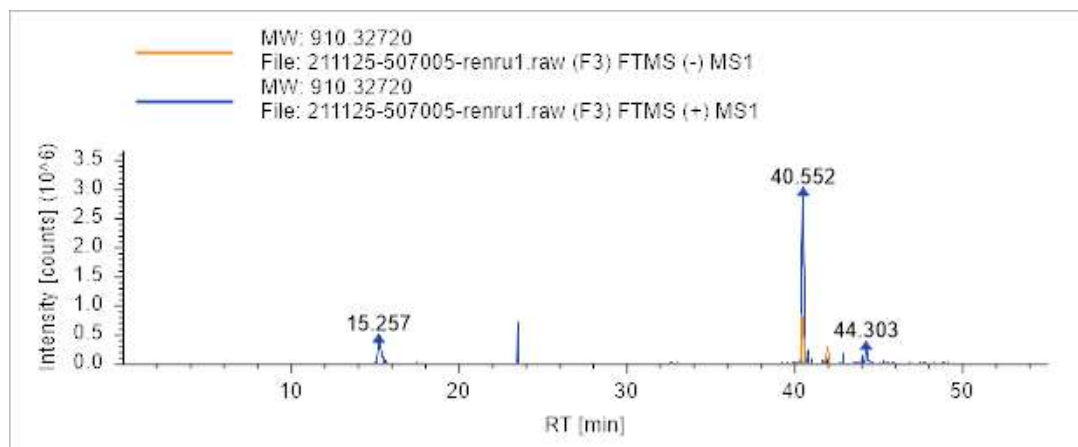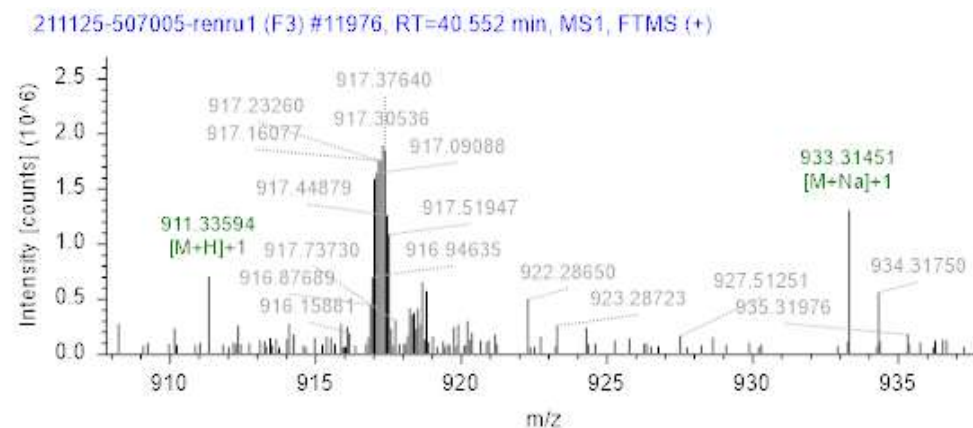

211125-507005-renru1 (F3) #11990, RT=40.587 min, MS2, FTMS (+), (HCD, DDA, 911.3359@30, +1)

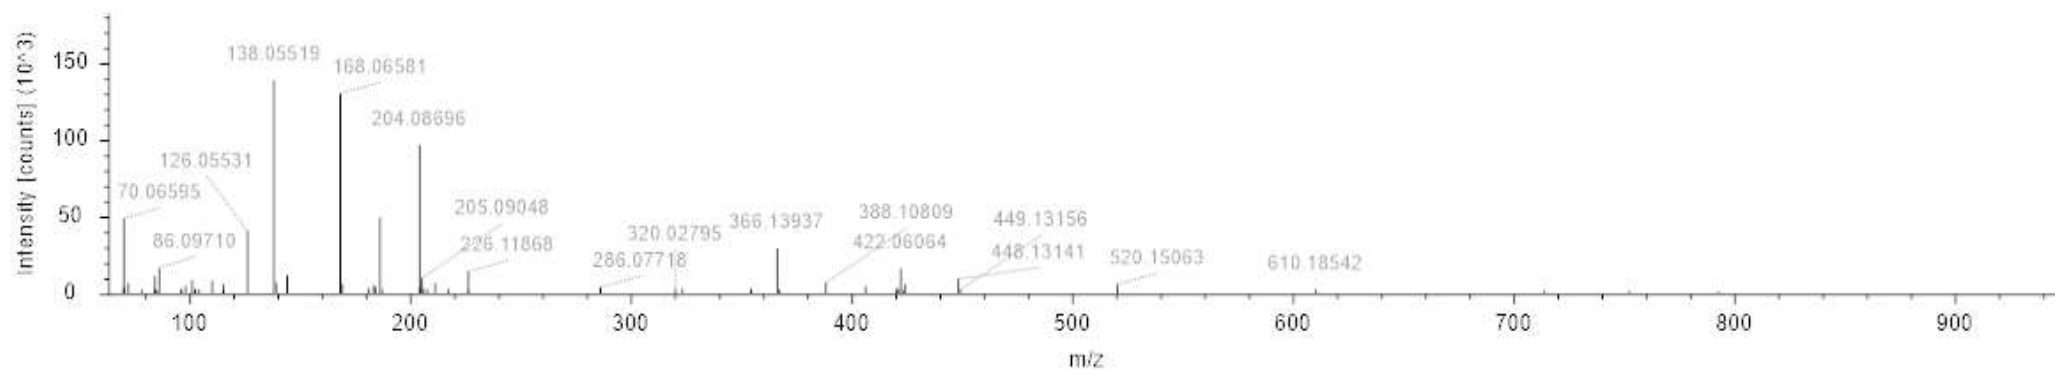



| Structure | Name | RT [min] | Formula | Calc. MW   | Areas  |
|-----------|------|----------|---------|------------|--------|
| n/a       |      | 42.41    | n/a     | 1015.35837 | 2.60e8 |

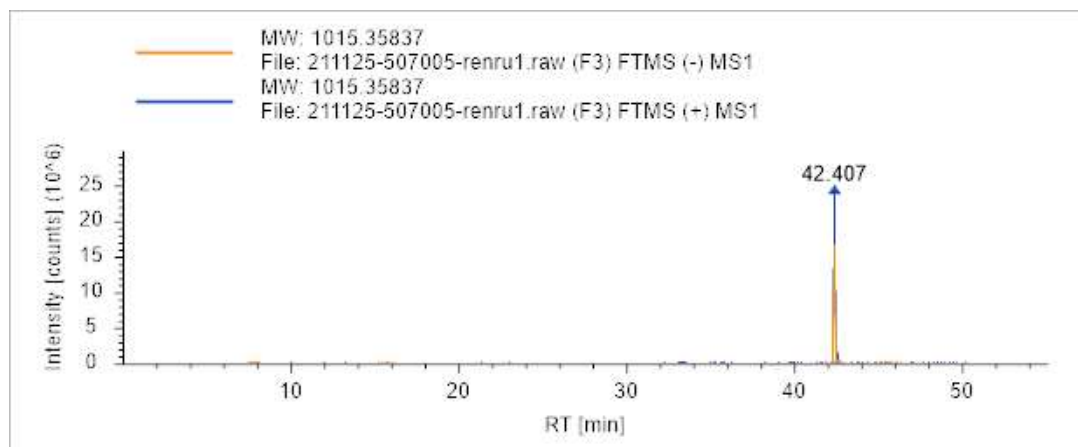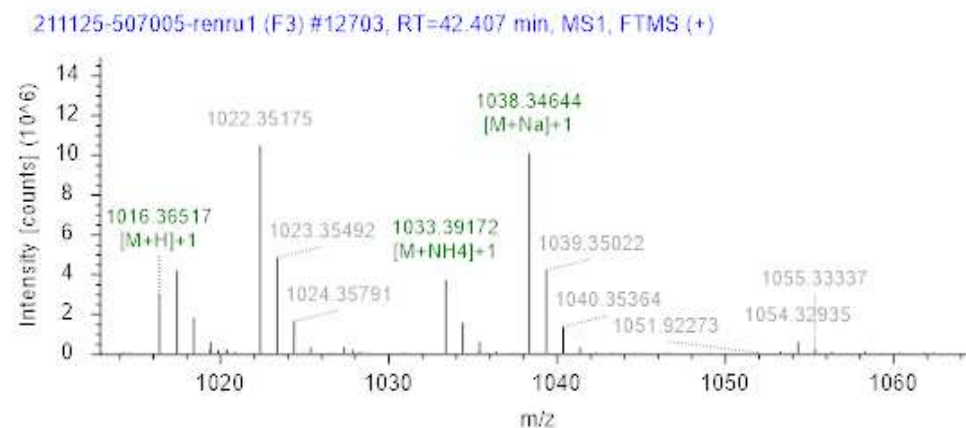

211125-507005-renru1 (F3) #12676, RT=42.340 min, MS2, FTMS (-), (HCD, DDA, 1014.3521@30, -1)

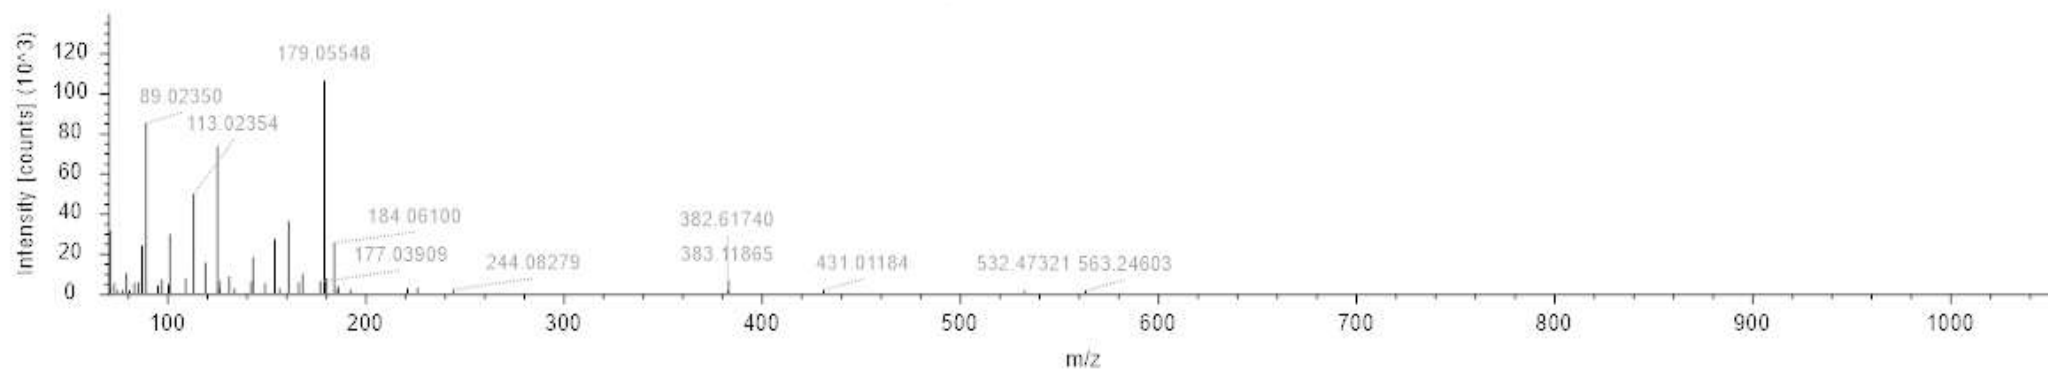





| Structure | Name | RT [min] | Formula | Calc. MW   | Areas  |
|-----------|------|----------|---------|------------|--------|
| n/a       |      | 43.24    | n/a     | 1056.38371 | 9.83e6 |

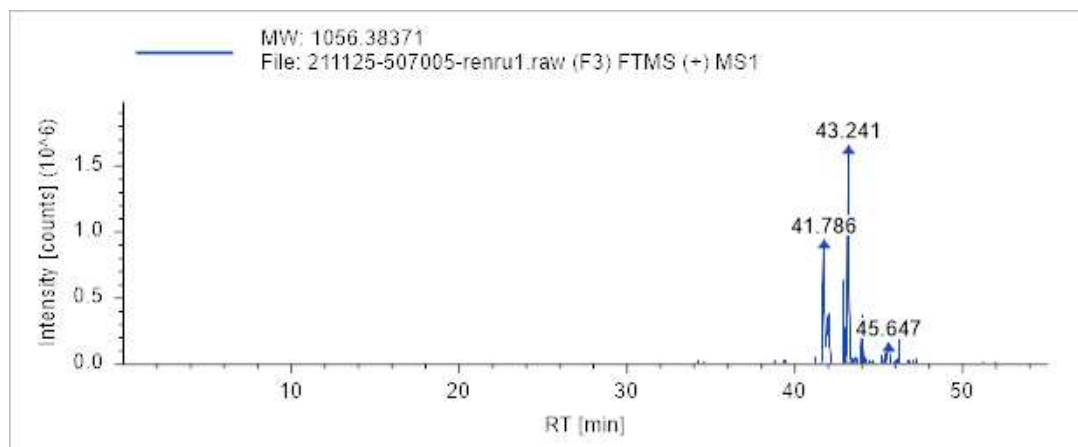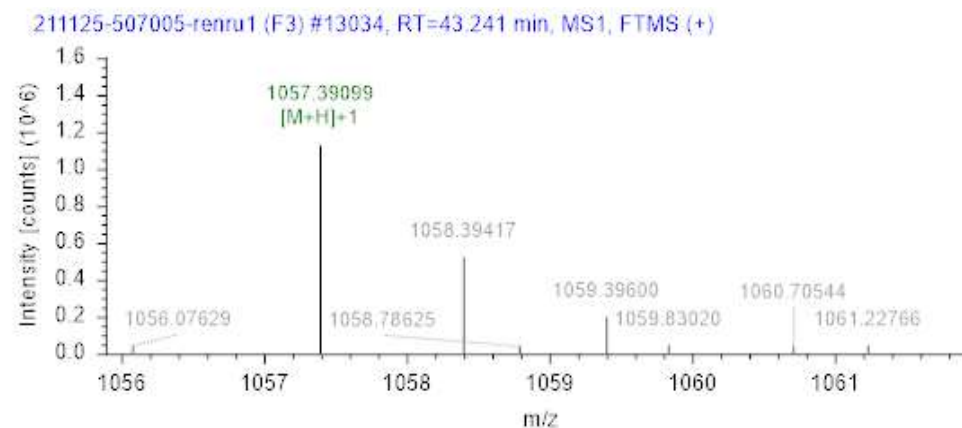

211125-507005-renru1 (F3) #13026, RT=43.219 min, MS2, FTMS (+), (HCD, DDA, 1057.3912@30, +1)

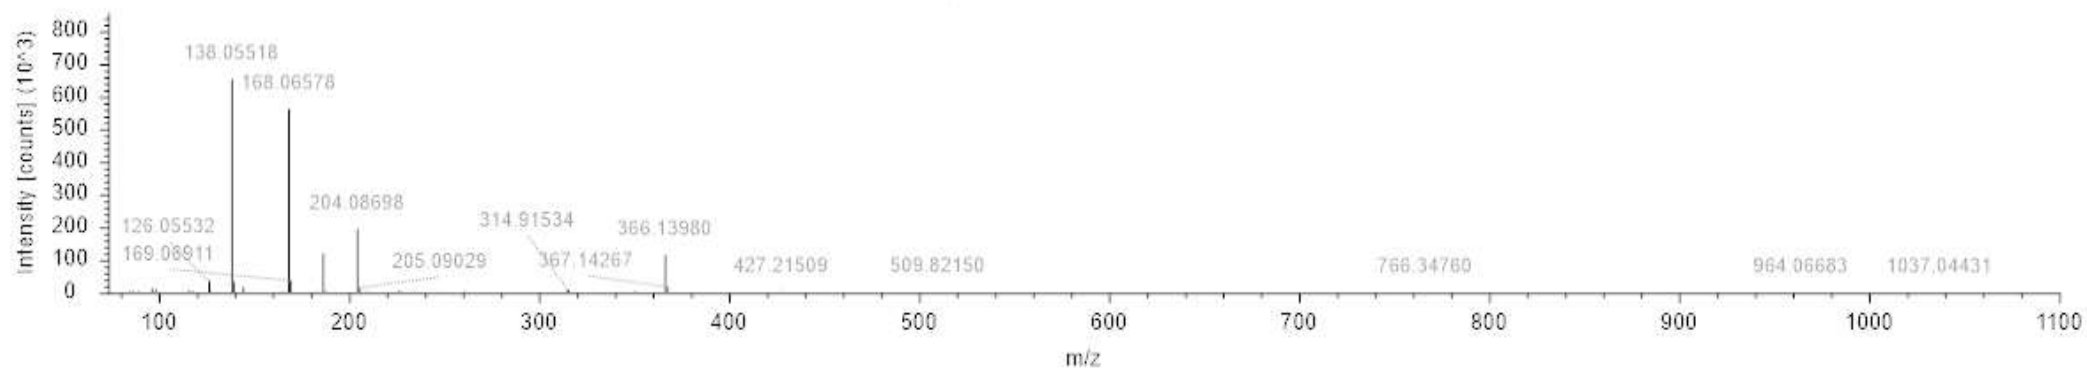



| Structure | Name | RT [min] | Formula | Calc. MW   | Areas  |
|-----------|------|----------|---------|------------|--------|
| n/a       |      | 41.77    | n/a     | 1056.38556 | 1.73e7 |

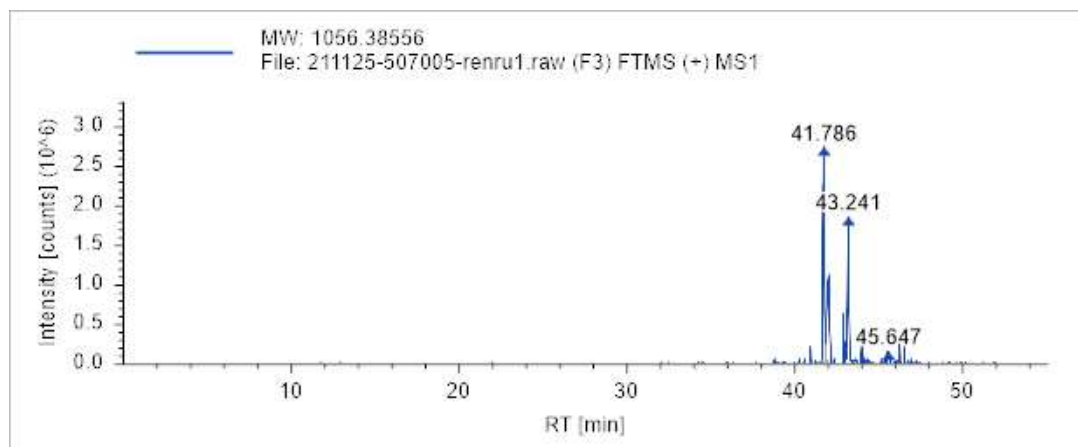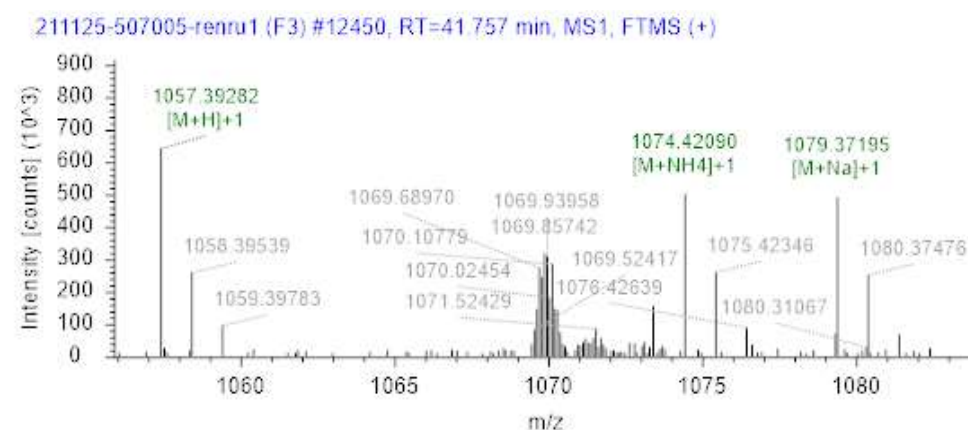

211125-507005-renru1 (F3) #12446, RT=41.740 min, MS2, FTMS (+), (HCD, DDA, 1057.3936@30, +1)

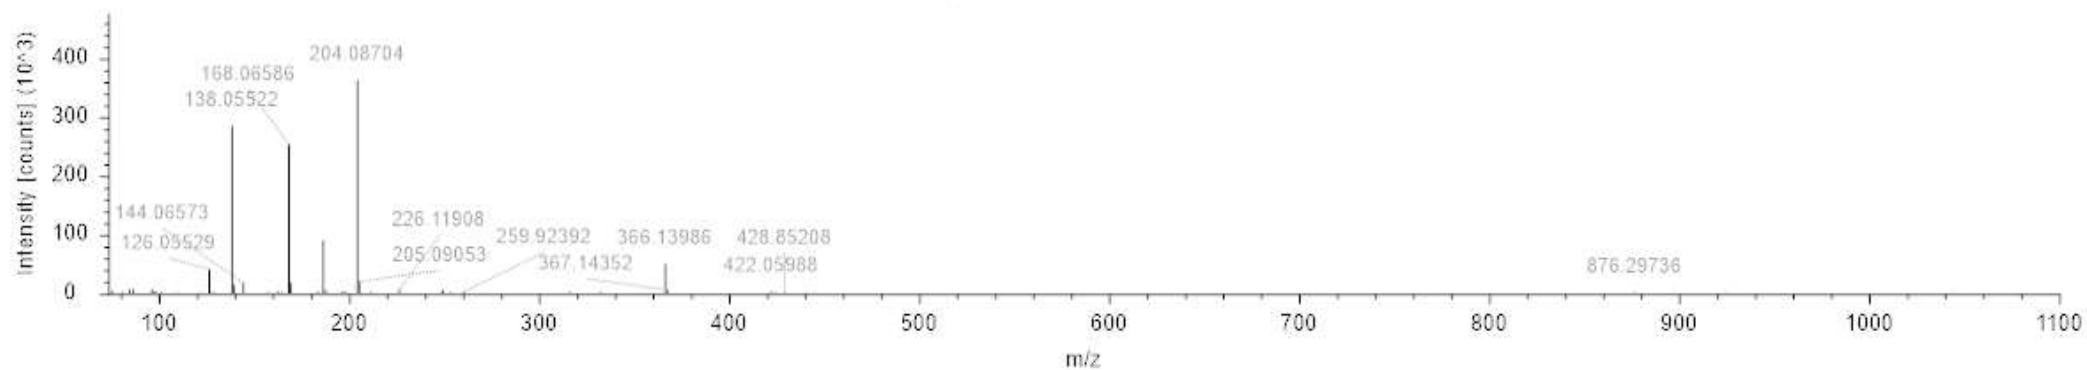



| Structure | Name | RT [min] | Formula | Calc. MW   | Areas  |
|-----------|------|----------|---------|------------|--------|
| n/a       |      | 41.99    | n/a     | 1072.38049 | 1.01e9 |

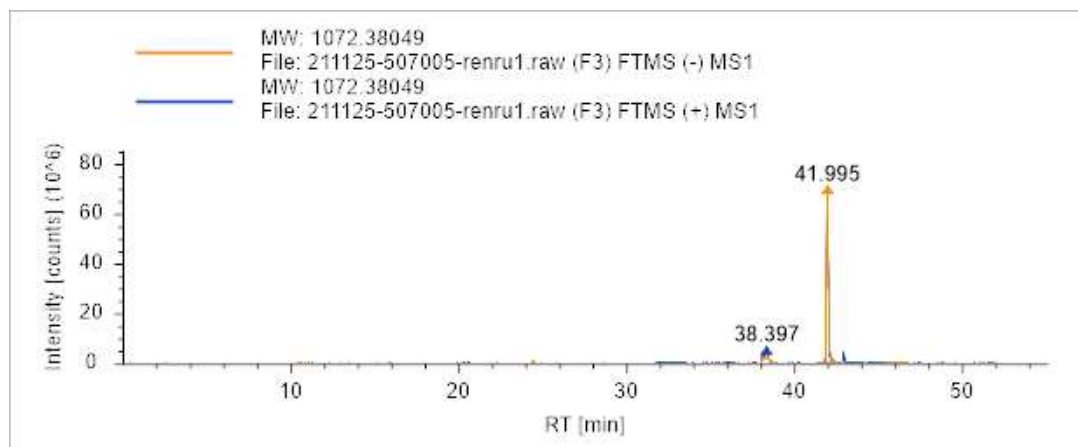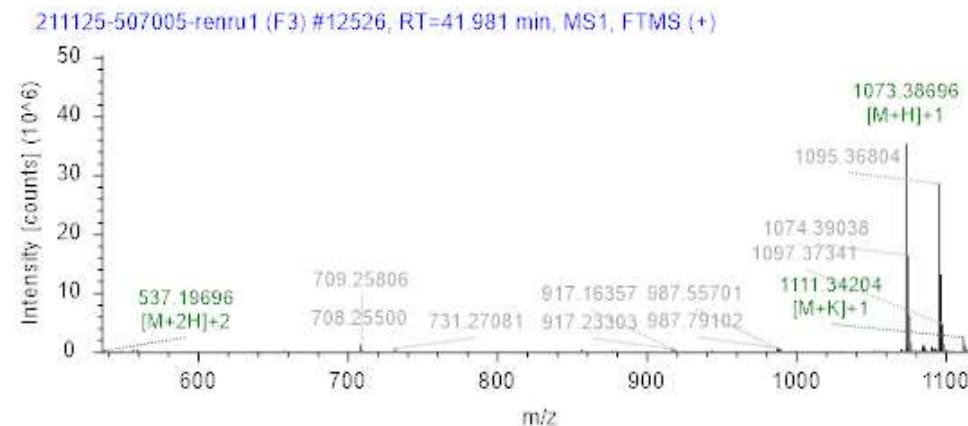

211125-507005-renru1 (F3) #12527, RT=41.983 min, MS2, FTMS (+), (HCD, DDA, 1073.3868@30, +1)

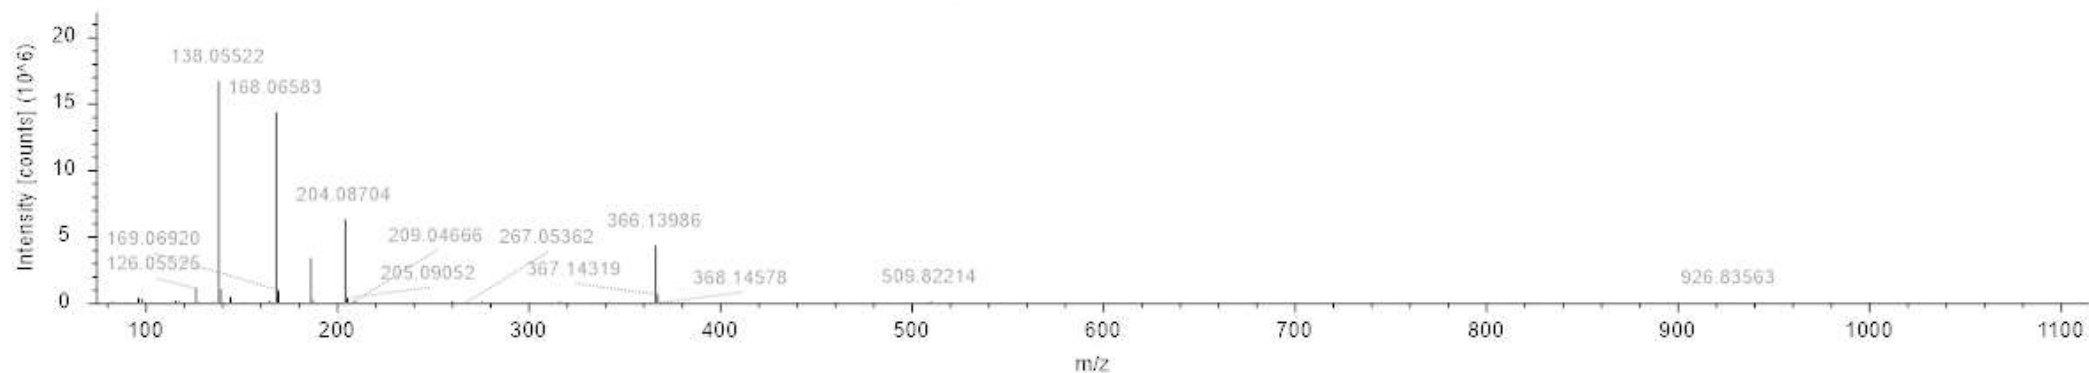



| Structure | Name | RT [min] | Formula | Calc. MW   | Areas  |
|-----------|------|----------|---------|------------|--------|
| n/a       |      | 45.38    | n/a     | 1218.43499 | 3.89e7 |

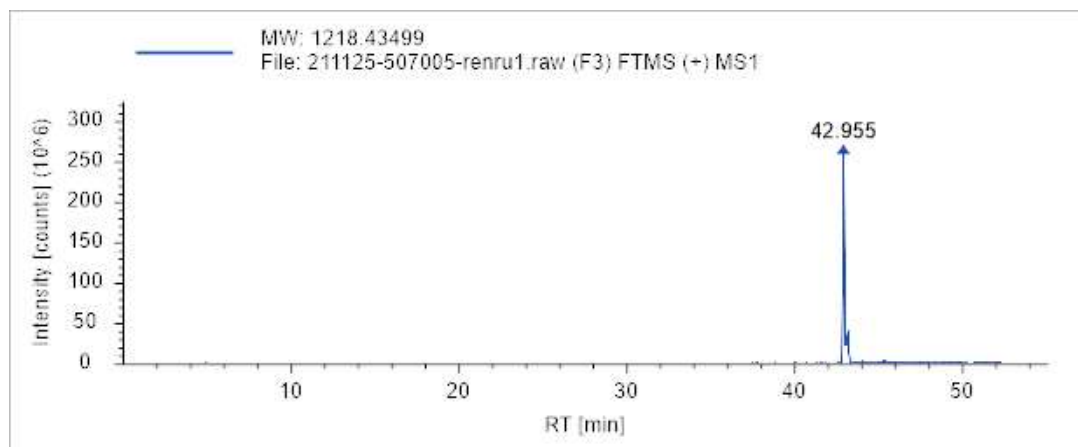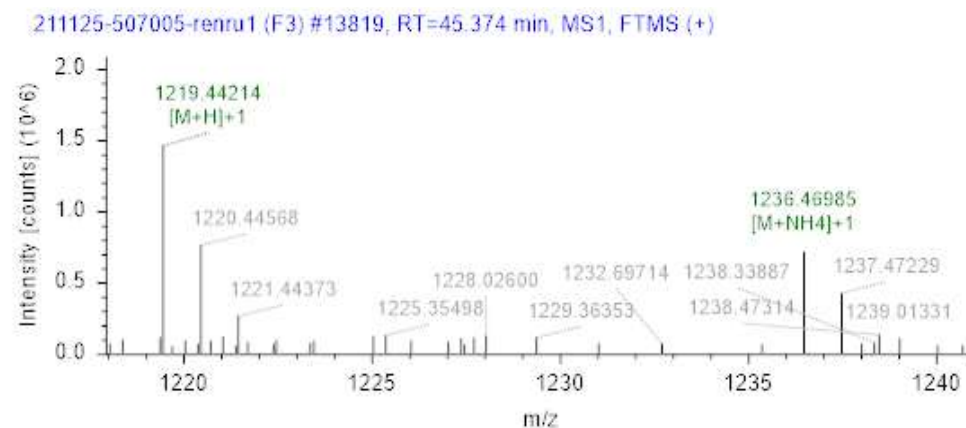

211125-507005-renru1 (F3) #13871, RT=45.507 min, MS2, FTMS (+), (HCD, DDA, 1219.4449@30, +1)

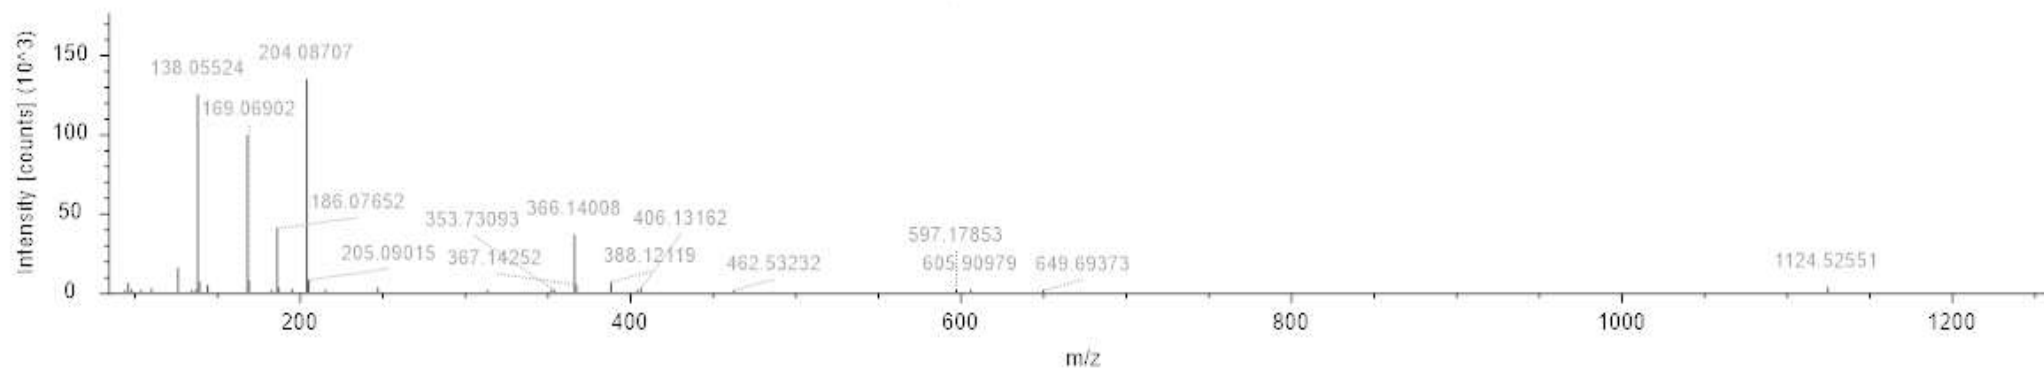



| Structure | Name | RT [min] | Formula | Calc. MW   | Areas  |
|-----------|------|----------|---------|------------|--------|
| n/a       |      | 42.95    | n/a     | 1218.43683 | 4.44e9 |

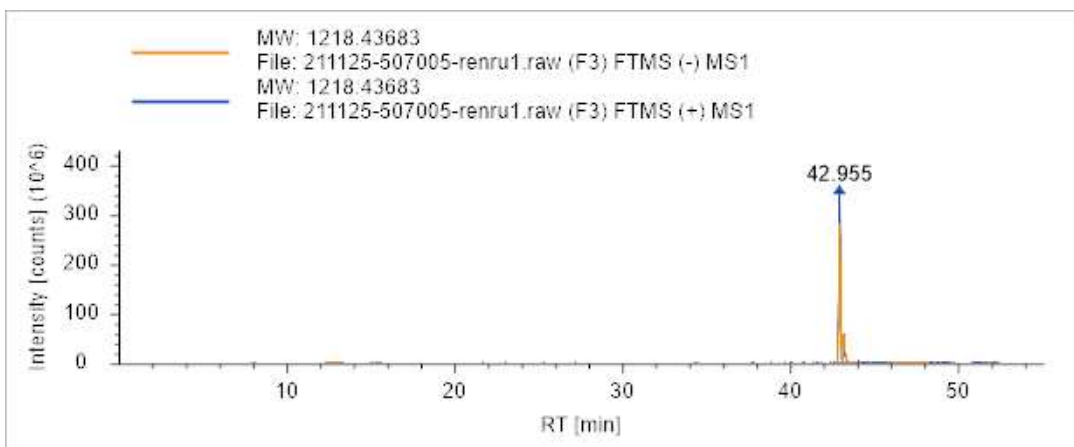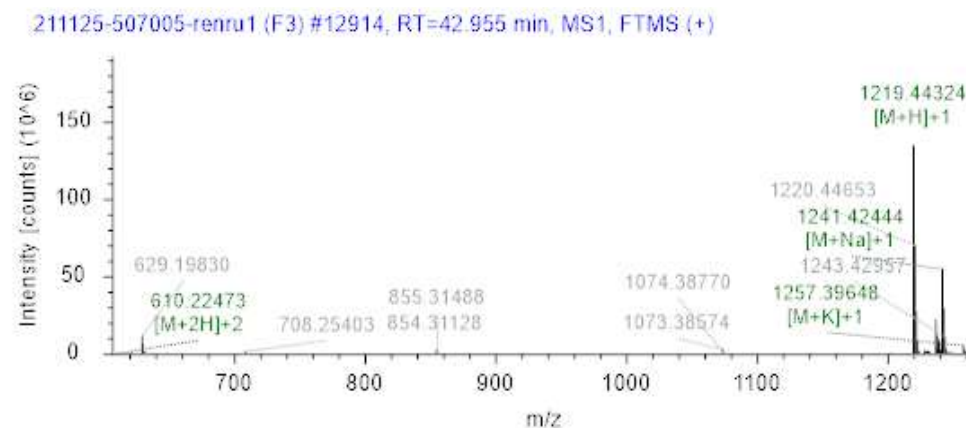

211125-507005-renru1 (F3) #12940, RT=43.014 min, MS2, FTMS (+), (HCD, DDA, 1218.4410@30, +1)

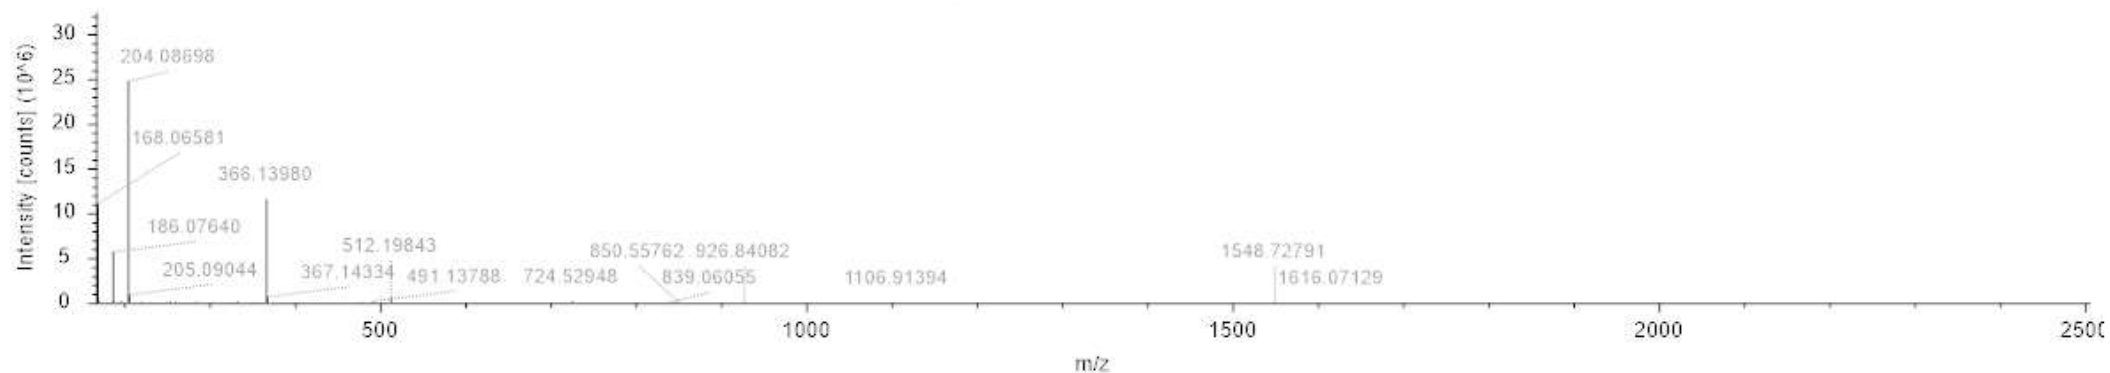



| Structure | Name | RT [min] | Formula | Calc. MW   | Areas  |
|-----------|------|----------|---------|------------|--------|
| n/a       |      | 42.52    | n/a     | 1259.46147 | 5.02e6 |

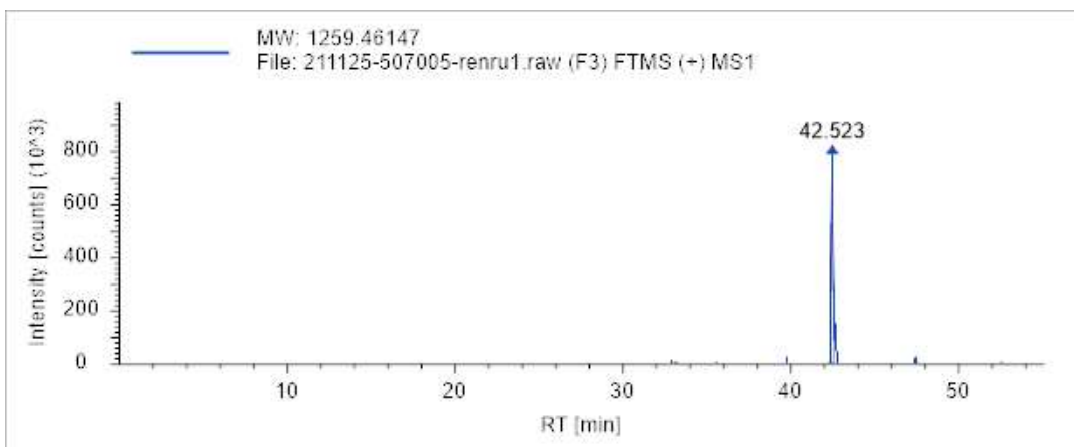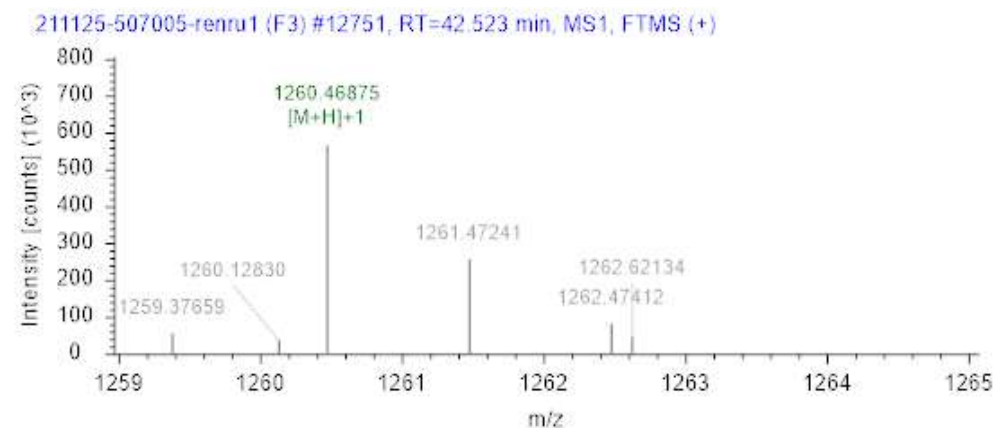

211125-507005-renru1 (F3) #12731, RT=42.471 min, MS2, FTMS (+), (HCD, DDA, 1260.4717@30, +1)

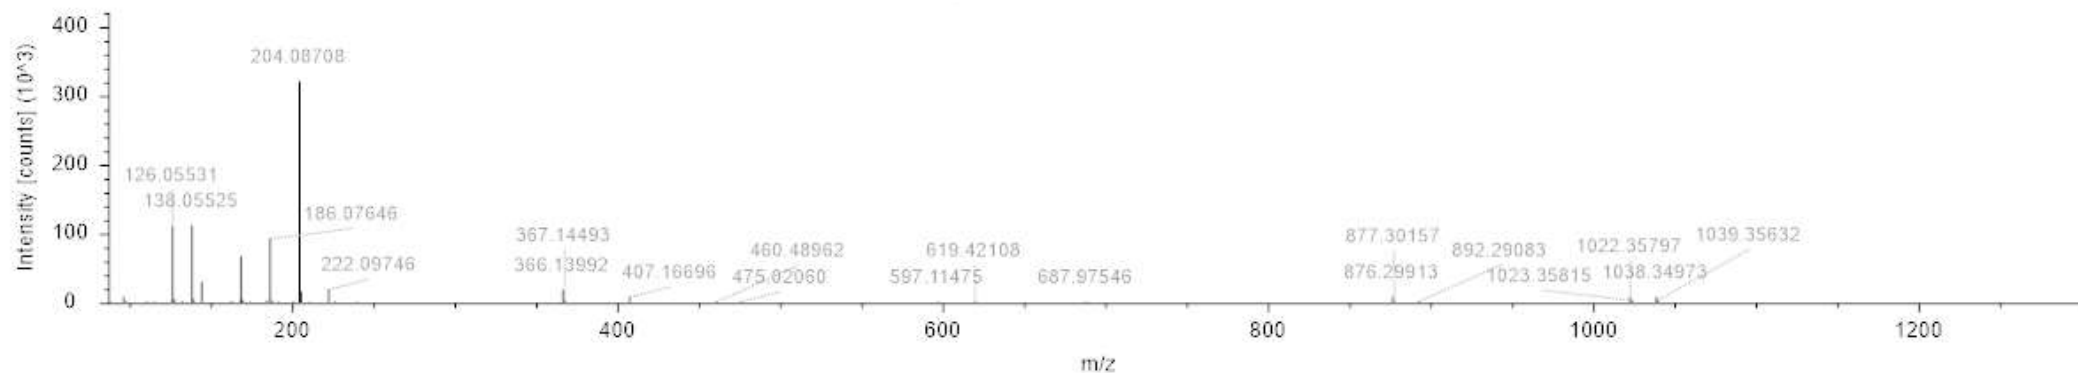



| Structure | Name | RT [min] | Formula | Calc. MW   | Areas  |
|-----------|------|----------|---------|------------|--------|
| n/a       |      | 45.78    | n/a     | 1437.50908 | 1.48e7 |

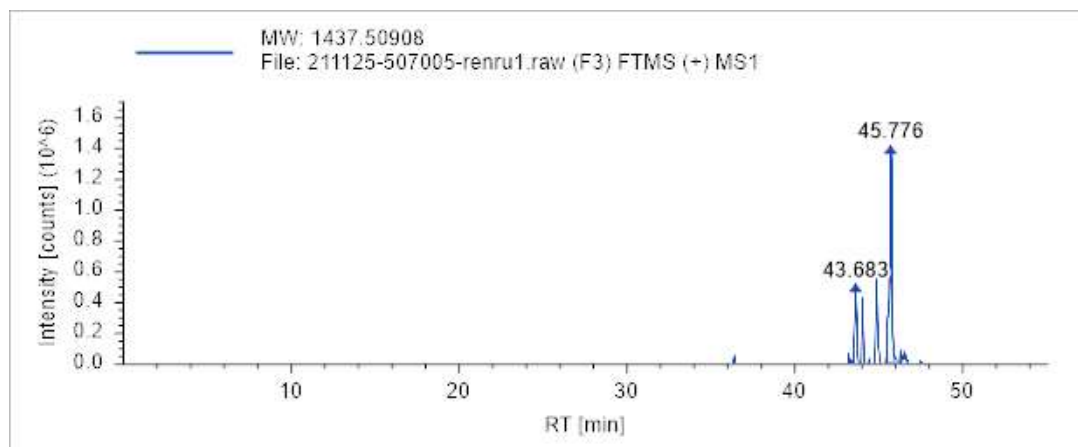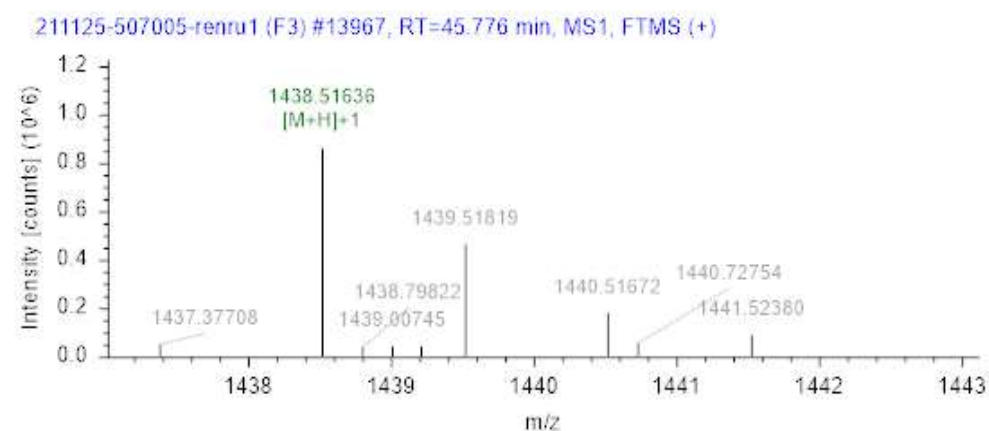

211125-507005-renru1 (F3) #14004, RT=45.874 min, MS2, FTMS (+), (HCD, DDA, 1438.5171@30, +1)

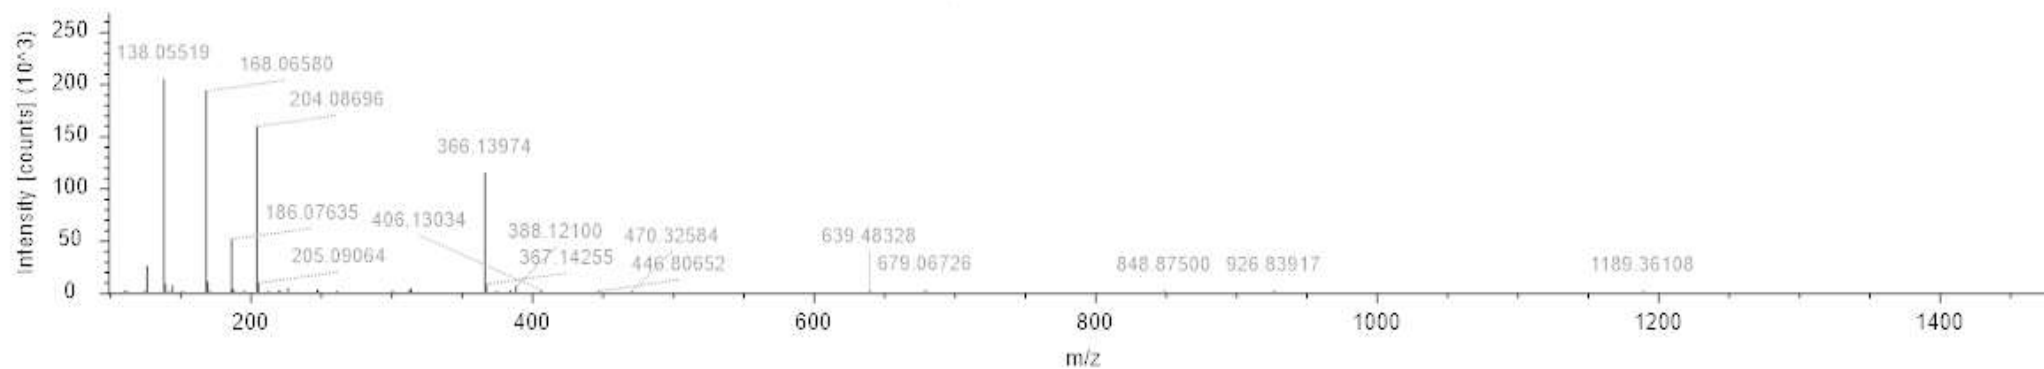





| Structure | Name | RT [min] | Formula | Calc. MW   | Areas  |
|-----------|------|----------|---------|------------|--------|
| n/a       |      | 43.68    | n/a     | 1437.51413 | 3.93e7 |

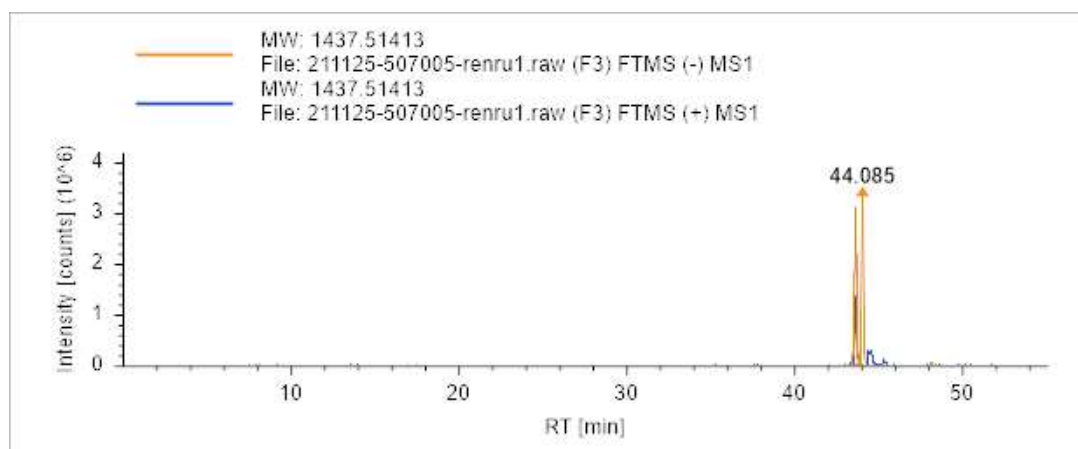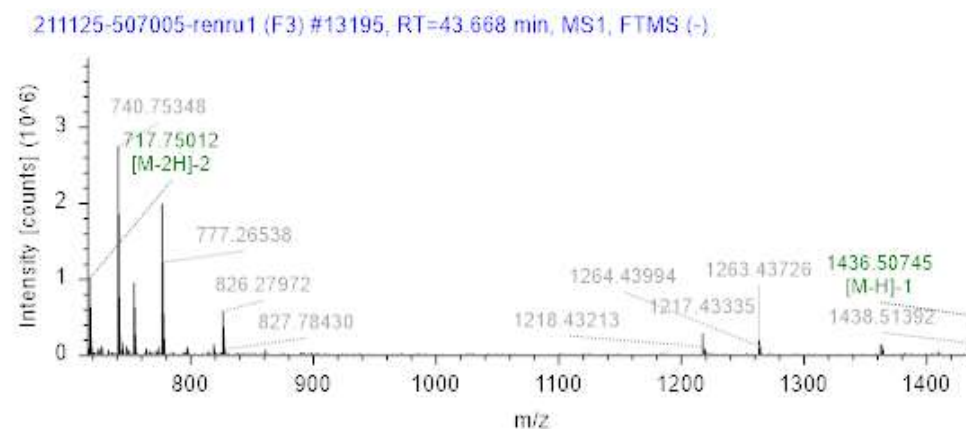

211125-507005-renru1 (F3) #13162, RT=43.582 min, MS2, FTMS (-), (HCD, DDA, 1436.5071@30, -1).

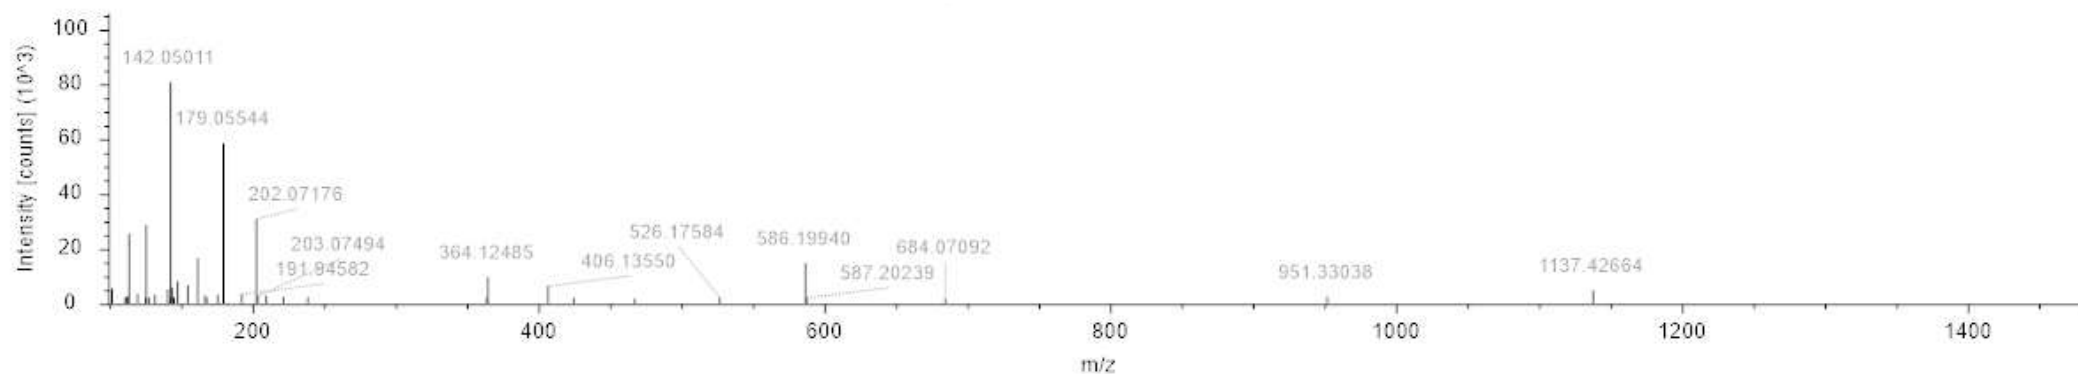



| Structure | Name | RT [min] | Formula | Calc. MW   | Areas  |
|-----------|------|----------|---------|------------|--------|
| n/a       |      | 45.03    | n/a     | 1510.55752 | 2.77e7 |

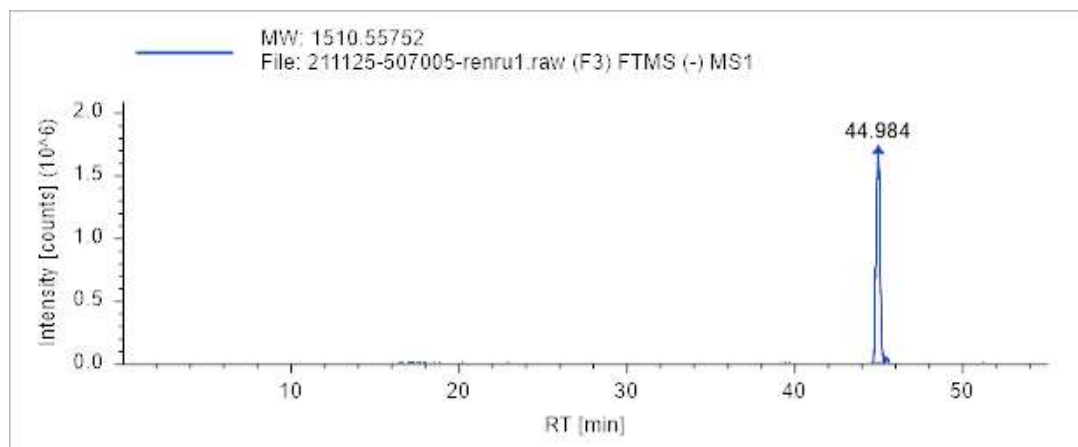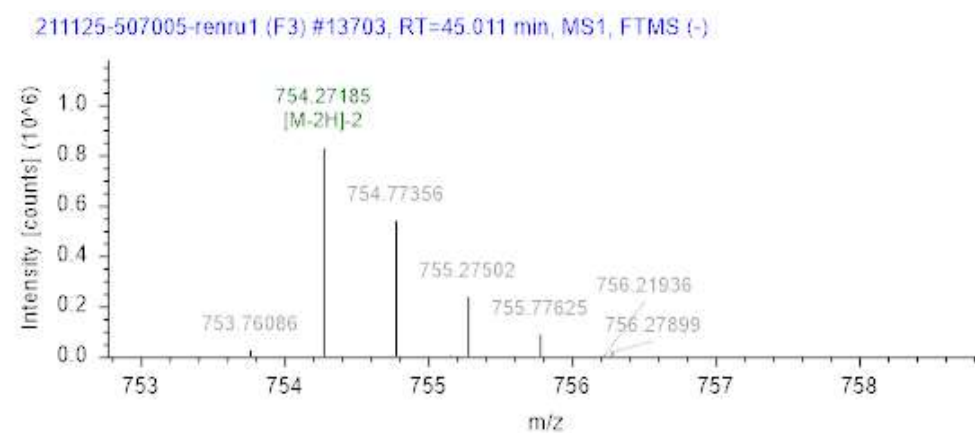

211125-507005-renru1 (F3) #13726, RT=45.090 min, MS2, FTMS (-), (HCD, DDA, 754.2721@30, -2)

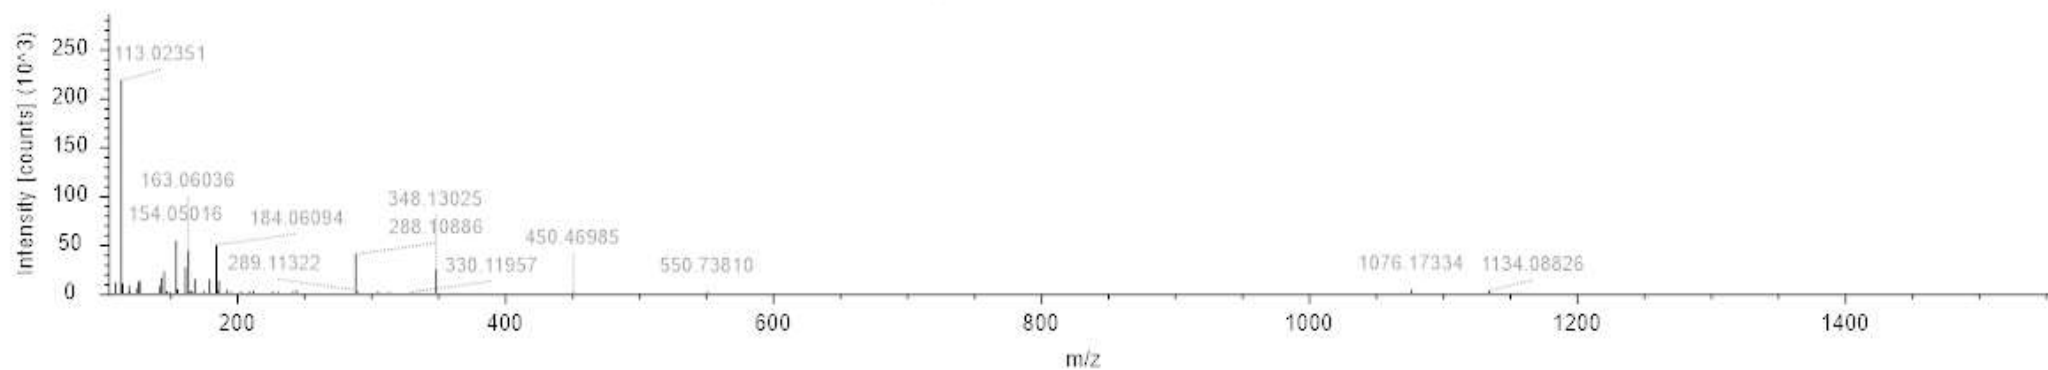



| Structure | Name | RT [min] | Formula | Calc. MW   | Areas  |
|-----------|------|----------|---------|------------|--------|
| n/a       |      | 45.21    | n/a     | 1526.55337 | 1.08e7 |

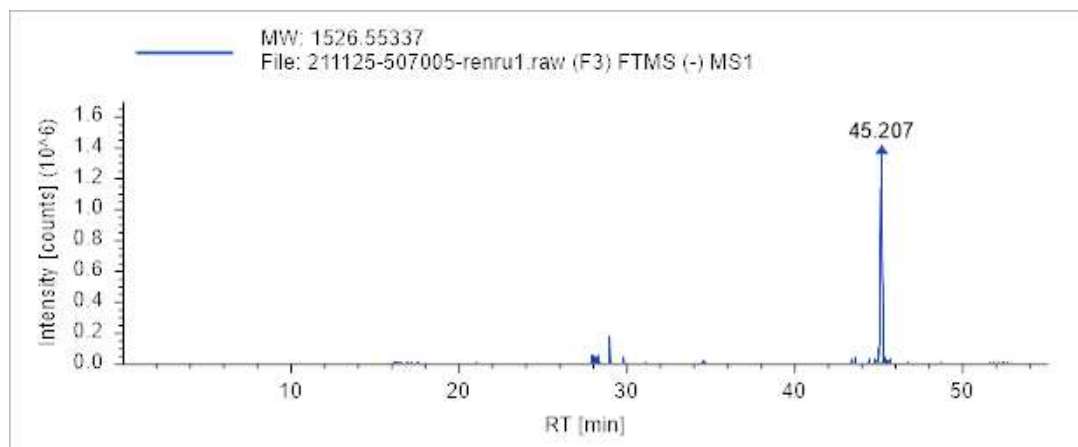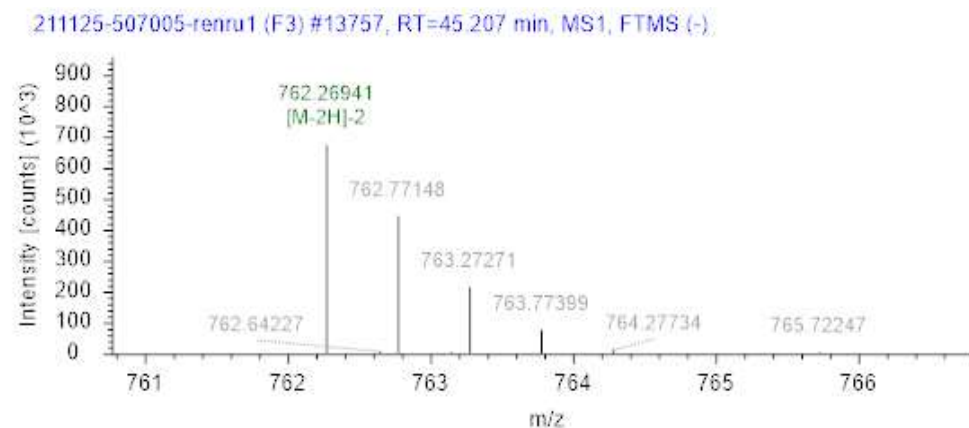

211125-507005-renru1 (F3) #13736, RT=45.136 min, MS2, FTMS (-), (HCD, DDA, 762.2697@30, -2)

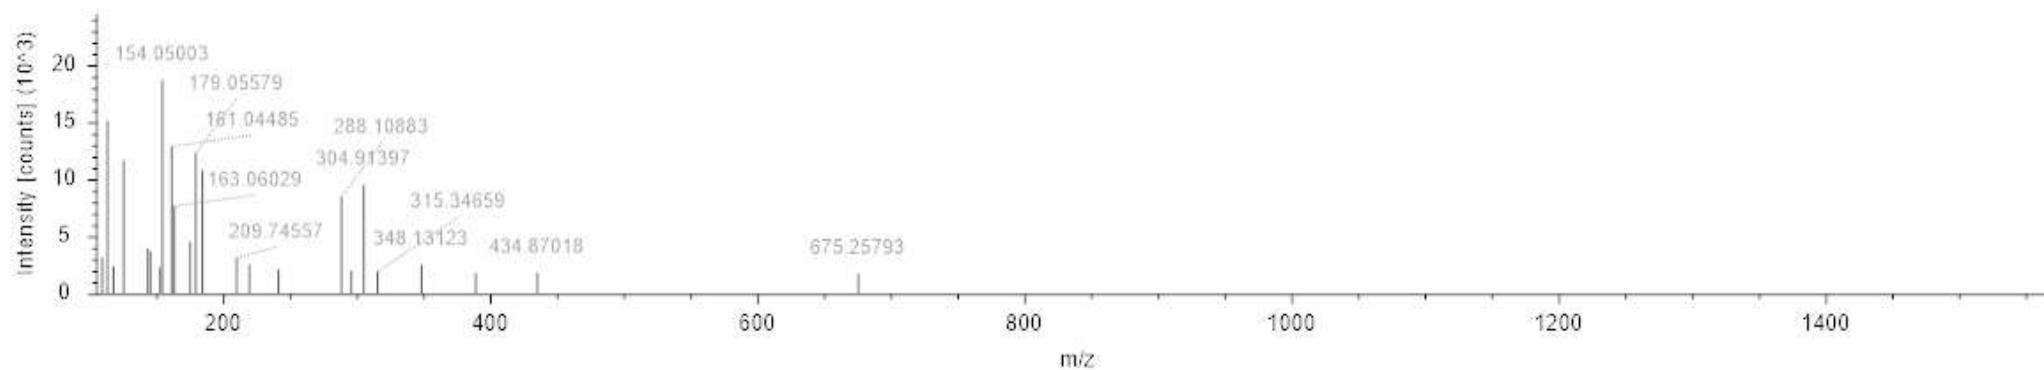



| Structure | Name | RT [min] | Formula | Calc. MW   | Areas  |
|-----------|------|----------|---------|------------|--------|
| n/a       |      | 44.09    | n/a     | 1526.55442 | 7.46e6 |

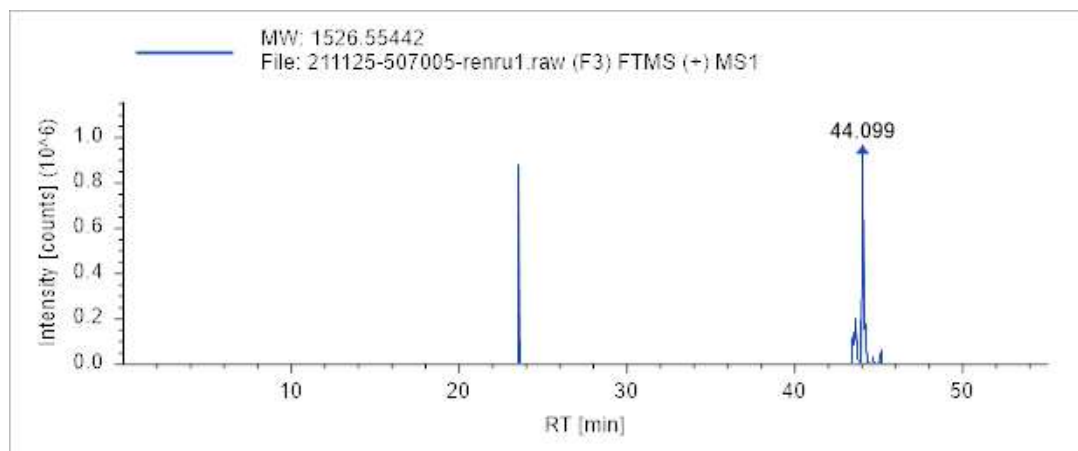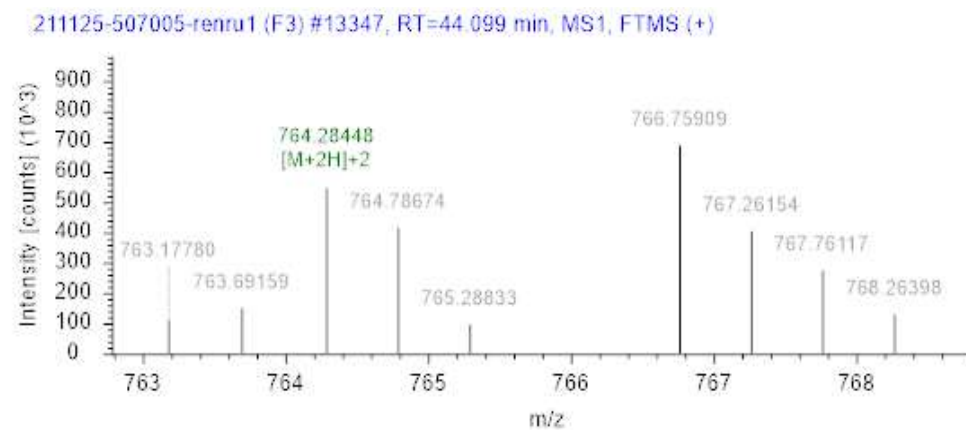



| Structure | Name | RT [min] | Formula | Calc. MW   | Areas  |
|-----------|------|----------|---------|------------|--------|
| n/a       |      | 45.38    | n/a     | 1583.56784 | 1.02e7 |

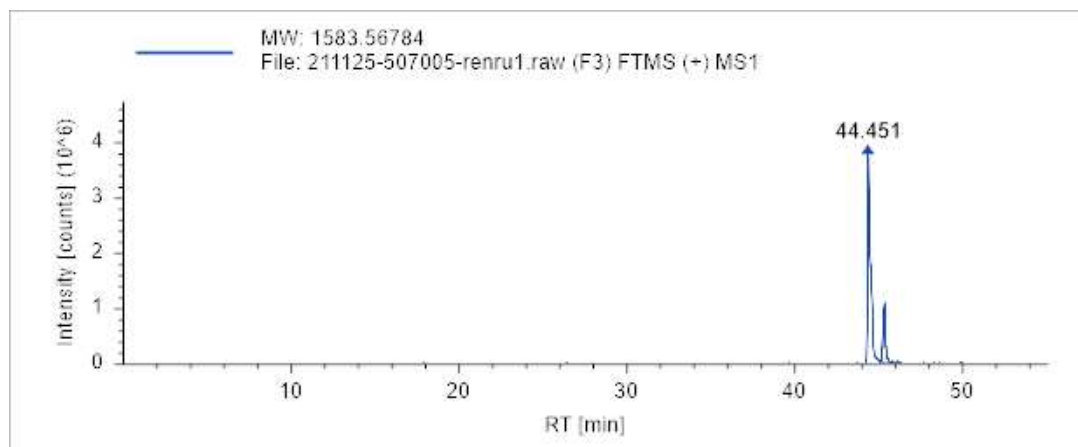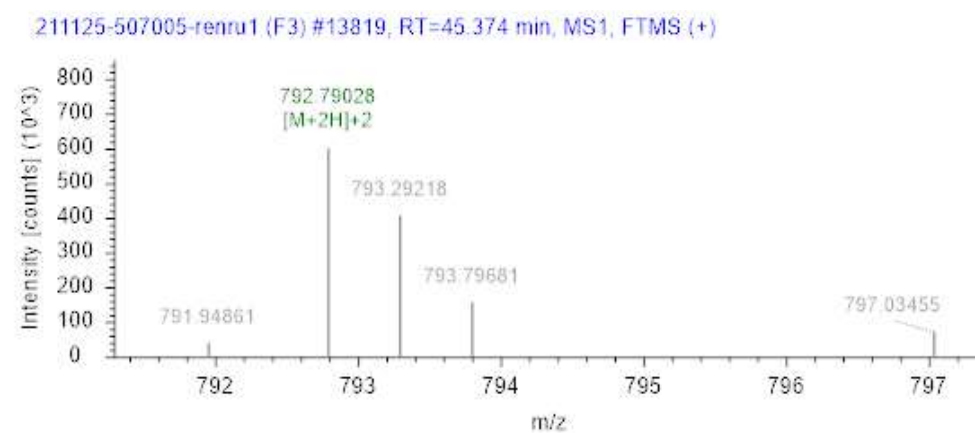

211125-507005-renru1 (F3) #13800, RT=45.321 min, MS2, FTMS (+), (HCD, DDA, 792.7910@30, +2)

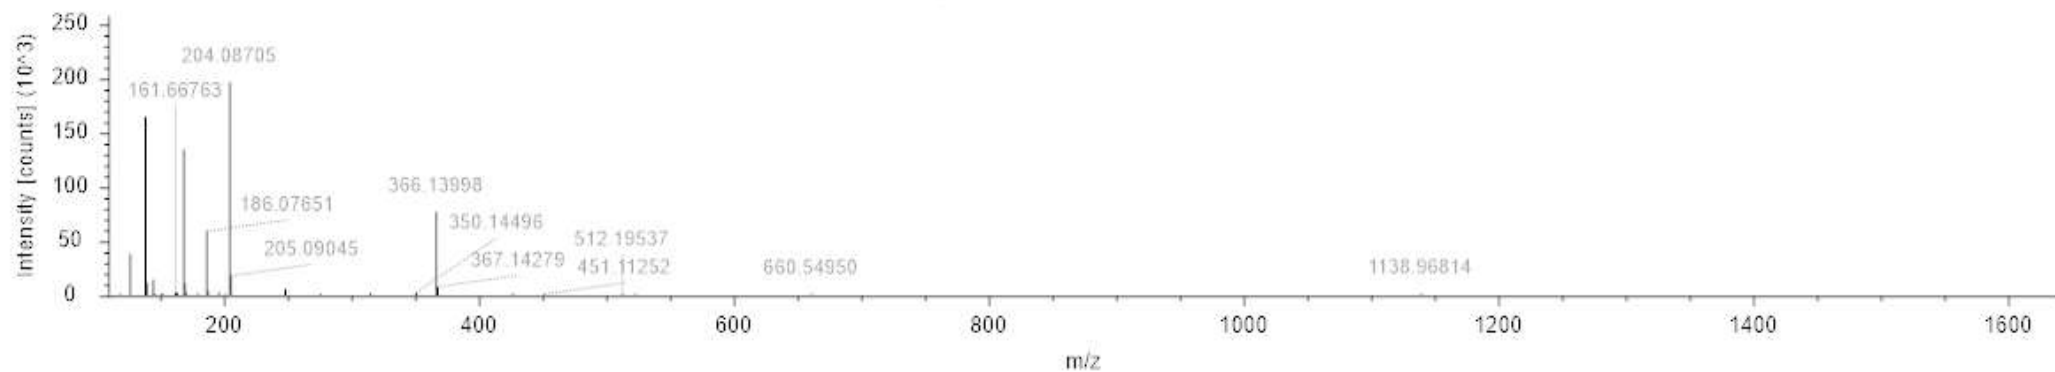



| Structure | Name | RT [min] | Formula | Calc. MW   | Areas  |
|-----------|------|----------|---------|------------|--------|
| n/a       |      | 44.66    | n/a     | 1583.57241 | 2.53e7 |

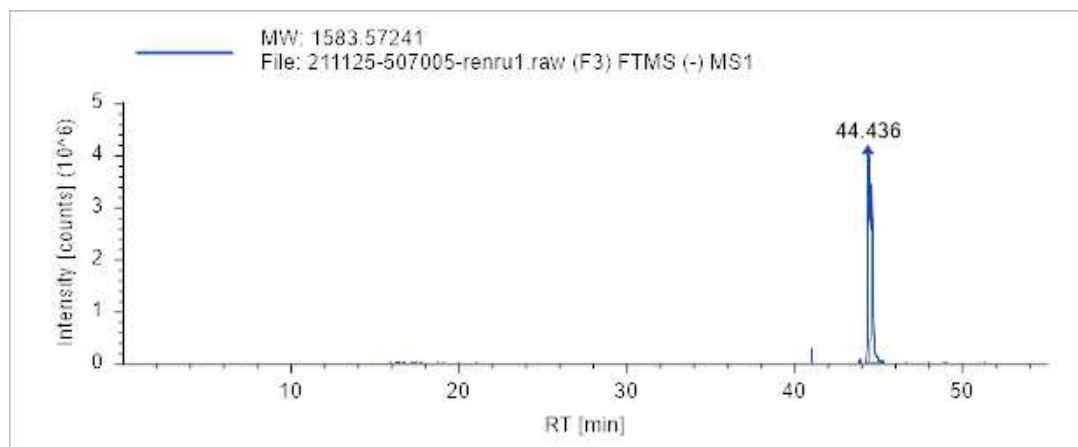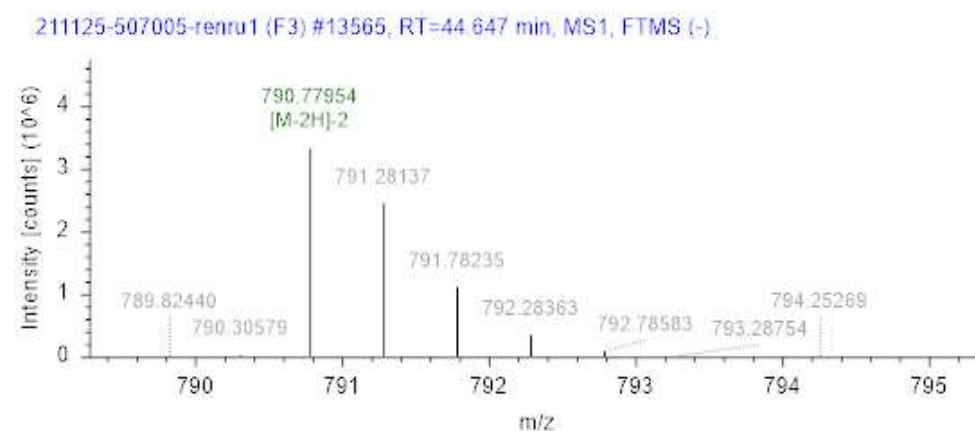

211125-507005-renru1 (F3) #13544, RT=44.589 min, MS2, FTMS (-), (HCD, DDA, 790.7795@30, -2)

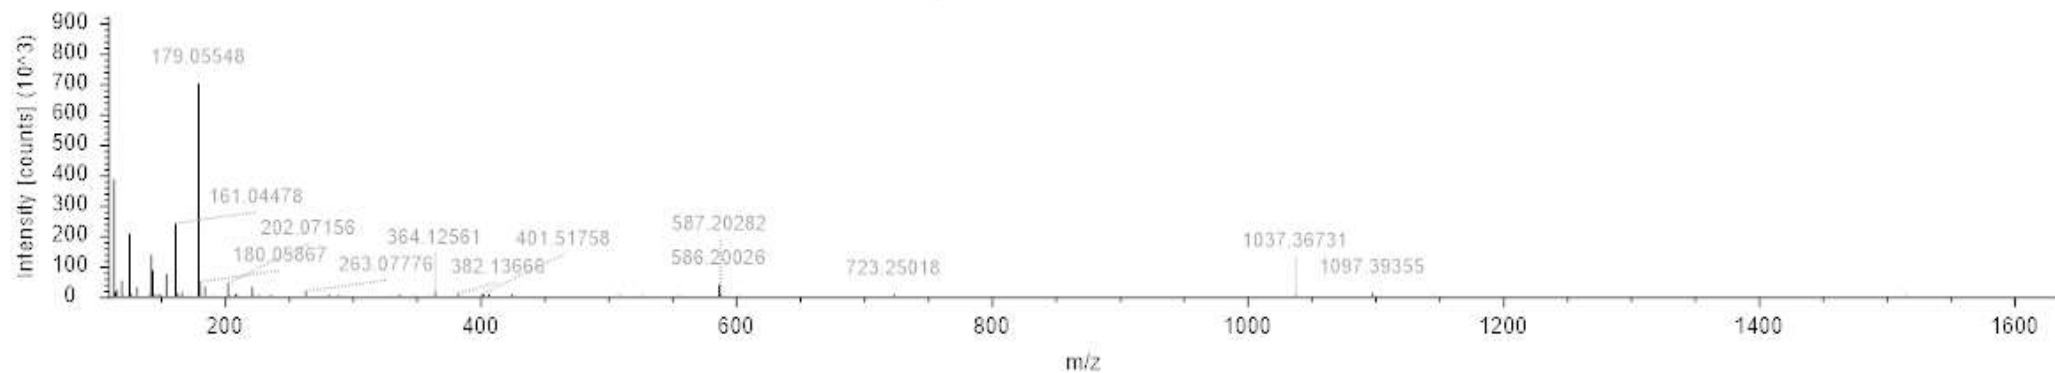



| Structure | Name | RT [min] | Formula | Calc. MW   | Areas  |
|-----------|------|----------|---------|------------|--------|
| n/a       |      | 45.38    | n/a     | 1729.62990 | 3.99e8 |

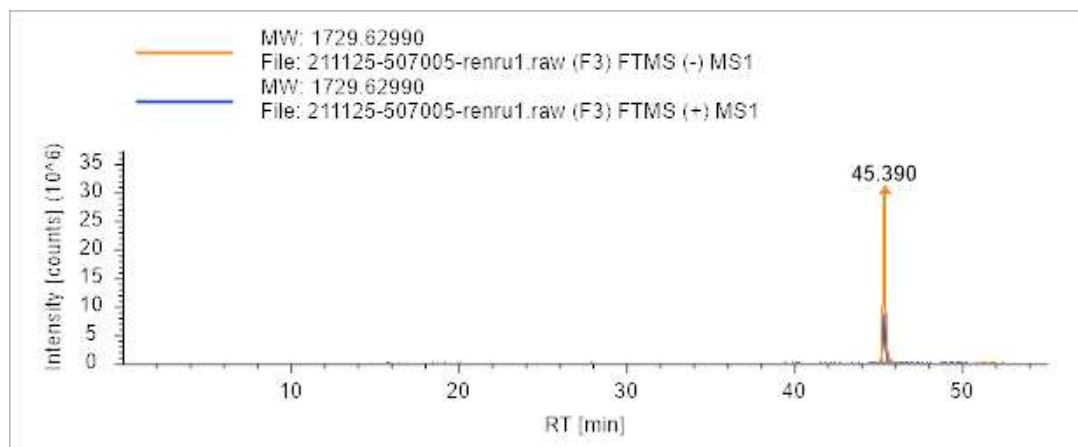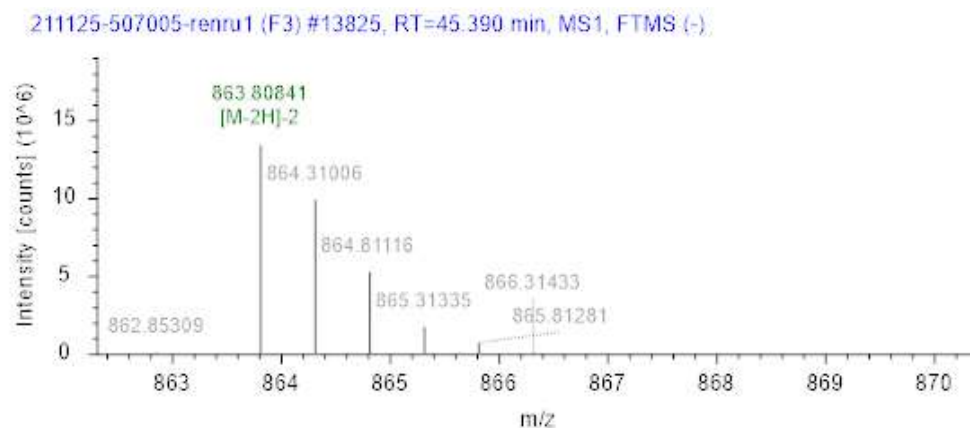

211125-507005-renru1 (F3) #13827, RT=45.395 min, MS2, FTMS (-), (HCD, DDA, 863.8084@30, -2)

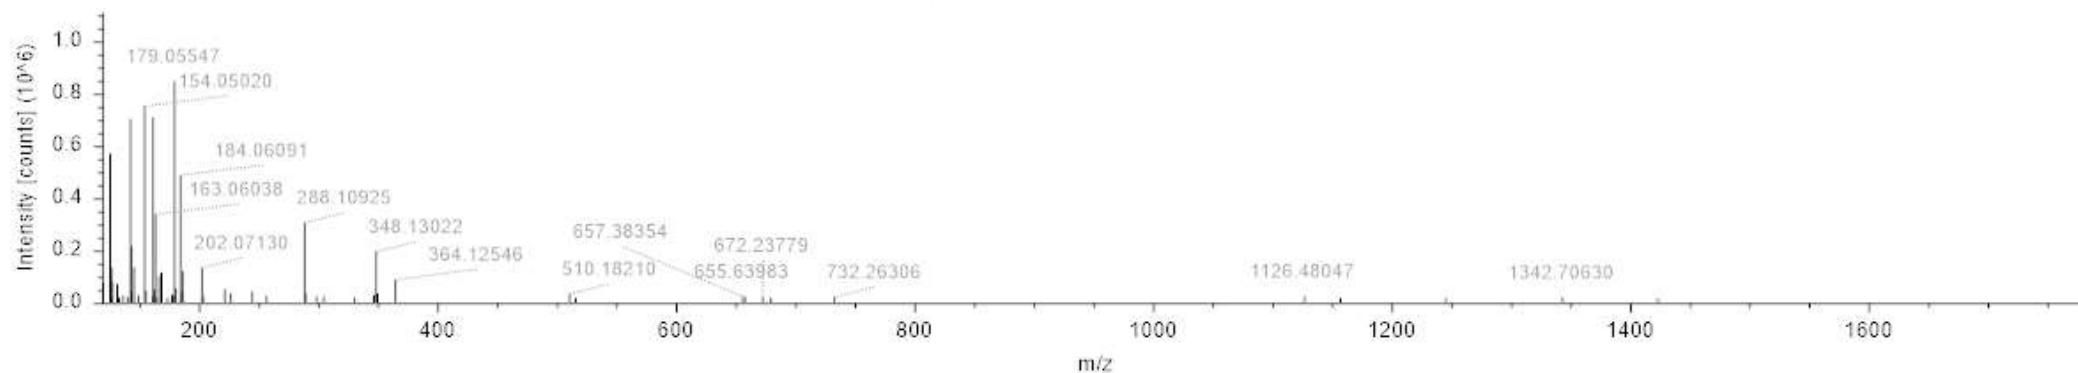





| Structure | Name | RT [min] | Formula | Calc. MW   | Areas  |
|-----------|------|----------|---------|------------|--------|
| n/a       |      | 44.92    | n/a     | 1802.64219 | 6.32e7 |

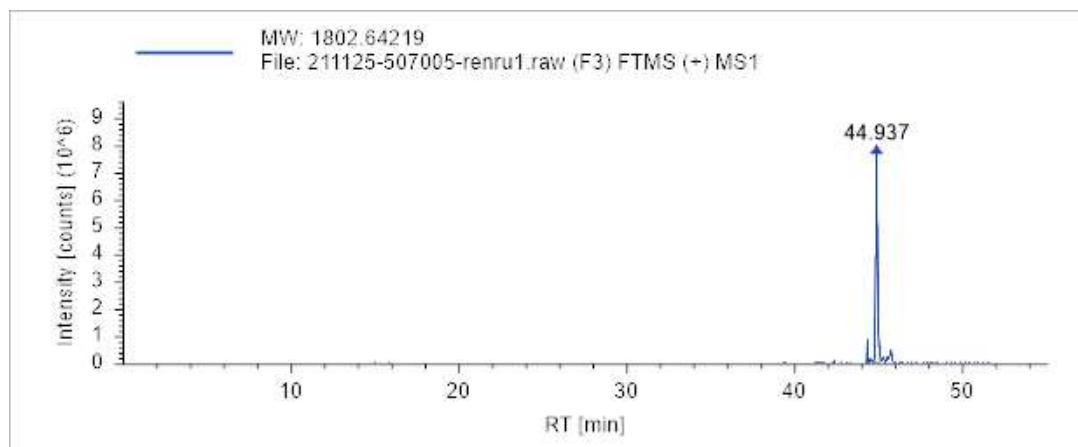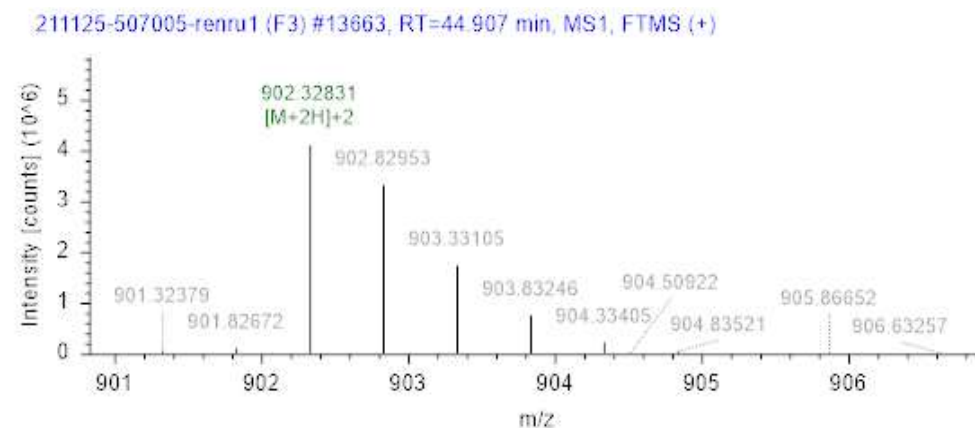

211125-507005-renru1 (F3) #13646, RT=44.854 min, MS2, FTMS (+), (HCD, DDA, 902.3293@30, +2)

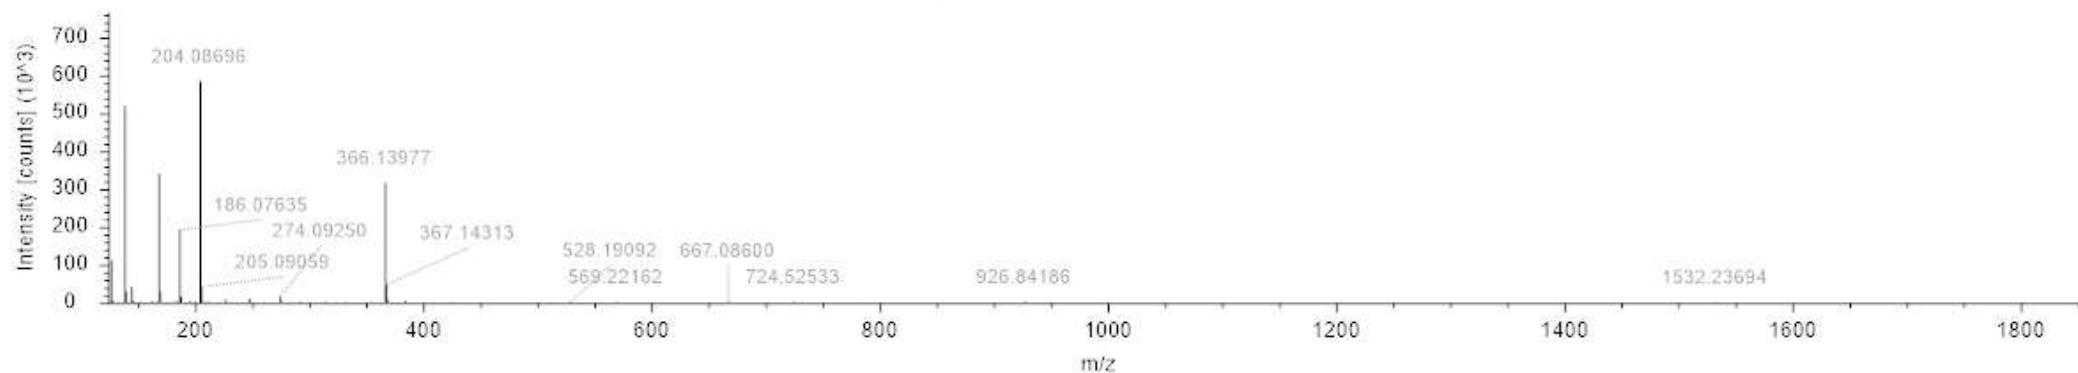



| Structure | Name | RT [min] | Formula | Calc. MW   | Areas  |
|-----------|------|----------|---------|------------|--------|
| n/a       |      | 46.27    | n/a     | 1875.68259 | 1.81e7 |

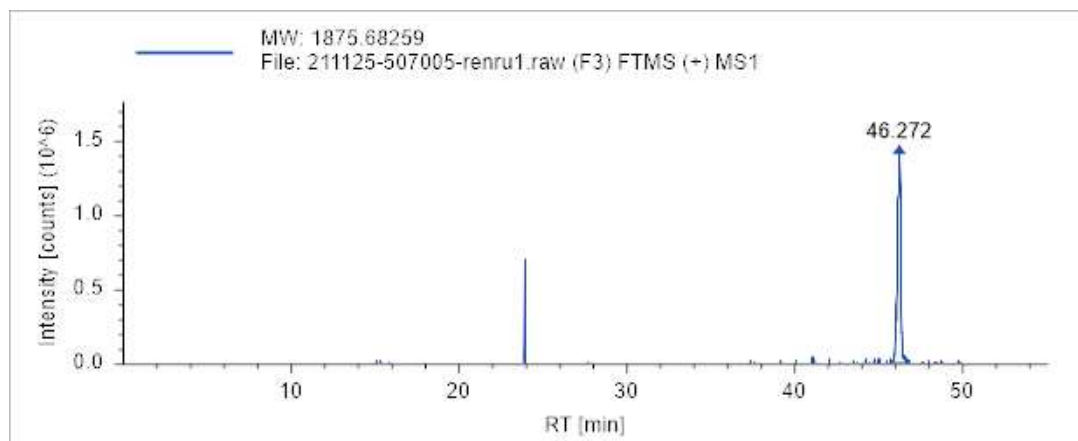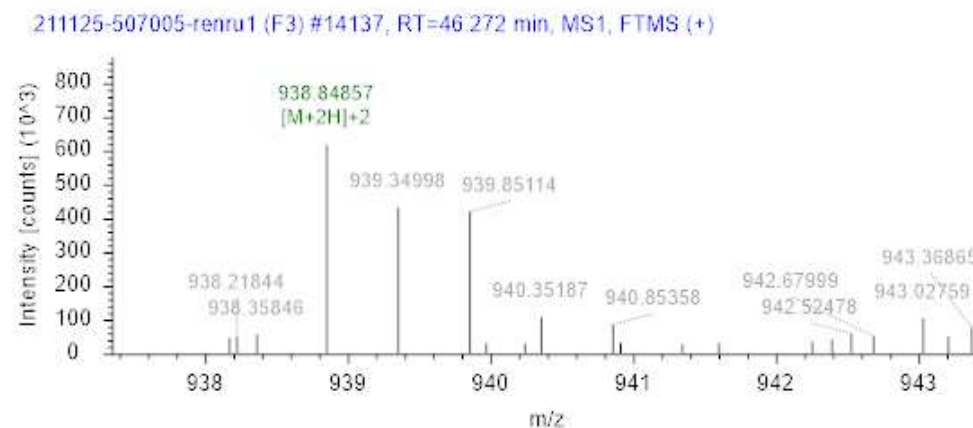

211125-507005-renru1 (F3) #14163, RT=46.342 min, MS2, FTMS (+), (HCD, DDA, 938.8495@30, +2)

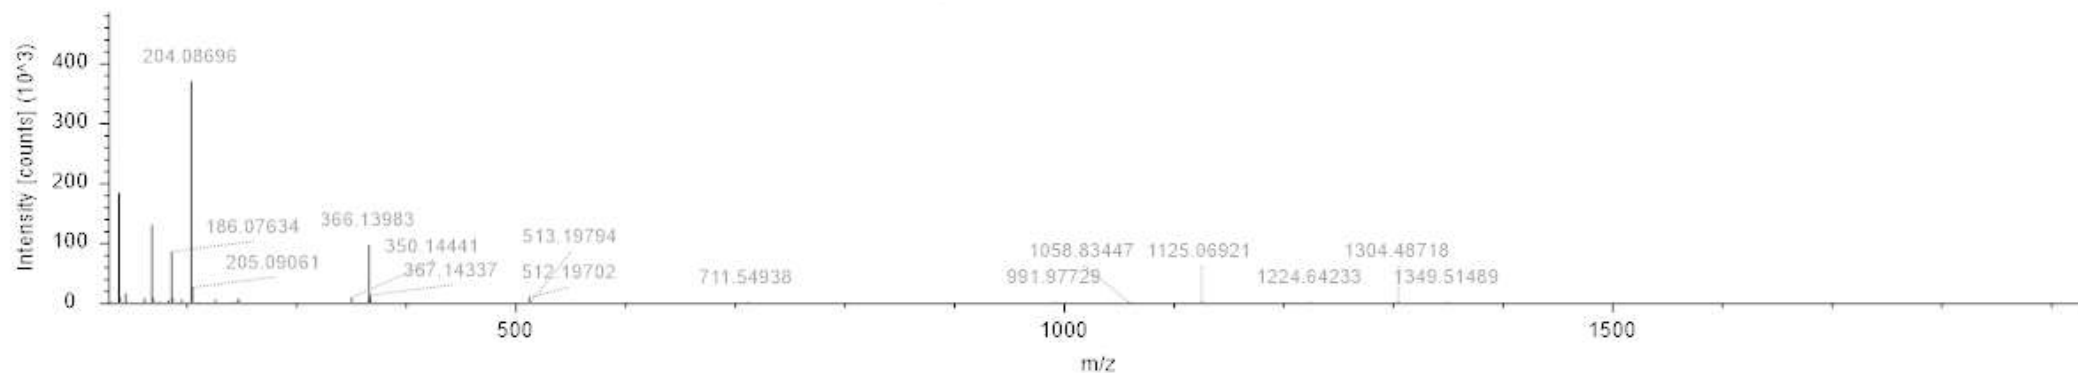



| Structure | Name | RT [min] | Formula | Calc. MW   | Areas  |
|-----------|------|----------|---------|------------|--------|
| n/a       |      | 45.58    | n/a     | 1948.69822 | 5.08e7 |

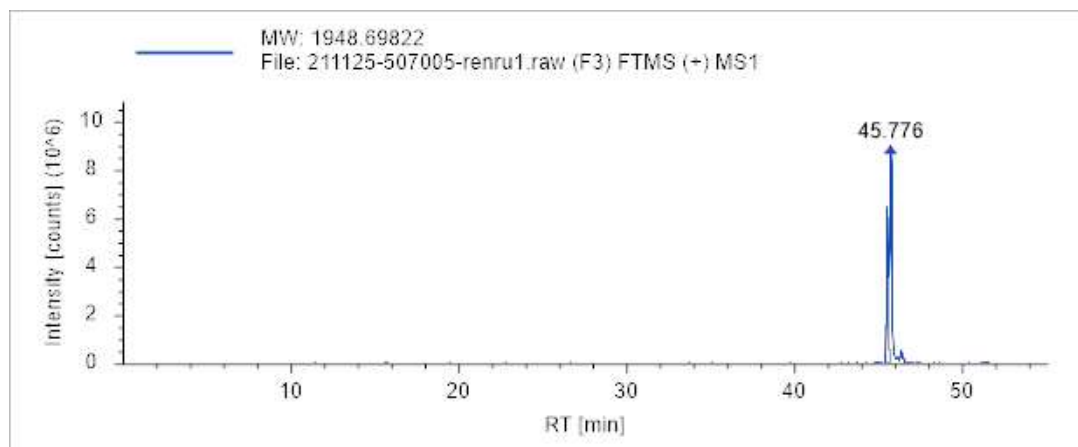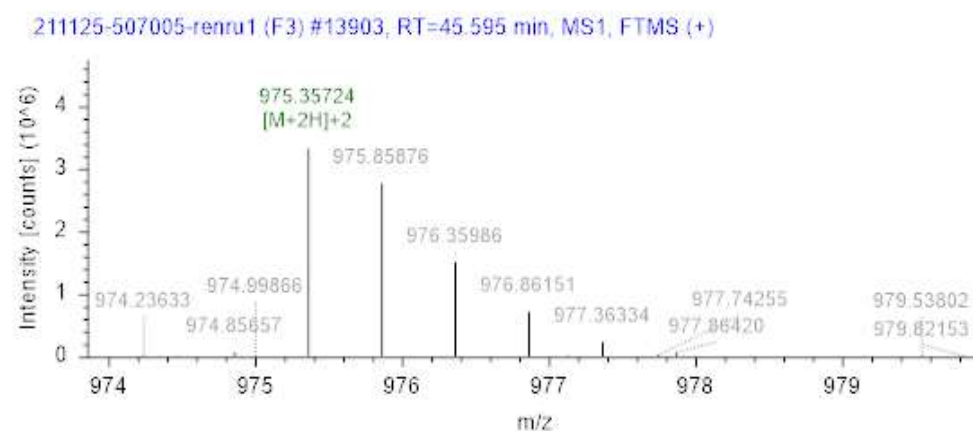

211125-507005-renru1 (F3) #13872, RT=45.508 min, MS2, FTMS (+), (HCD, DDA, 975.3572@30, +2)

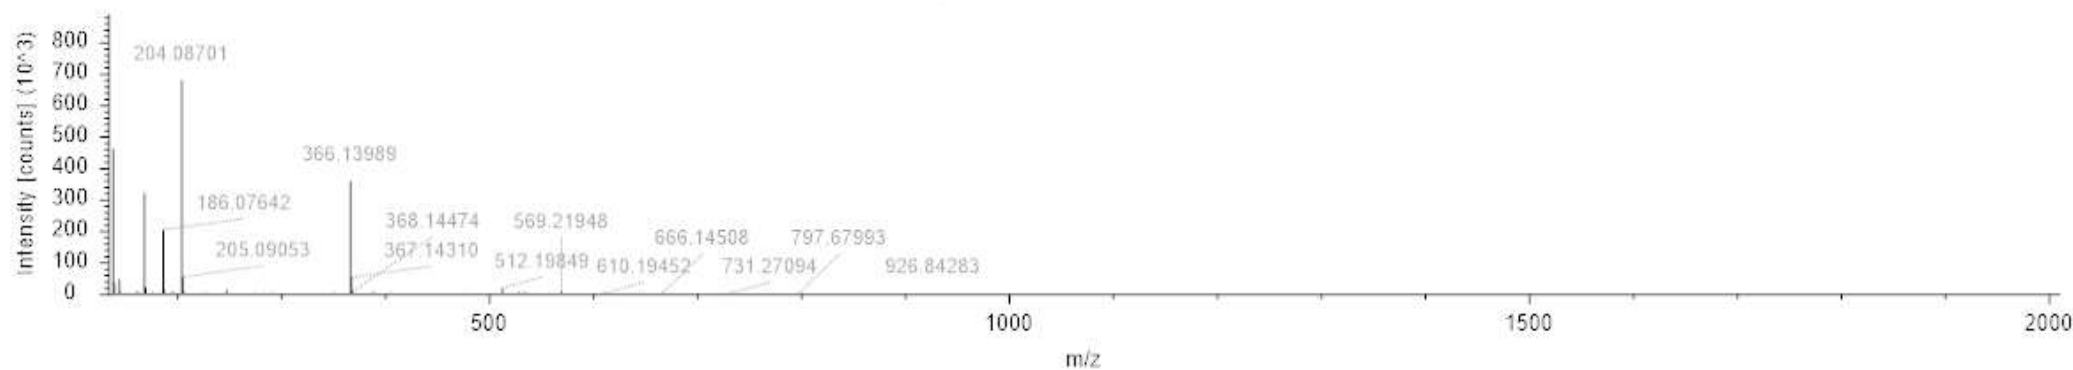



| Structure | Name | RT [min] | Formula | Calc. MW   | Areas                                                                                                                                                                                                                  |
|-----------|------|----------|---------|------------|------------------------------------------------------------------------------------------------------------------------------------------------------------------------------------------------------------------------|
| n/a       |      | 46.43    | n/a     | 2094.76375 | <div style="display: flex; width: 100%; height: 15px; background-color: #cccccc;"><div style="width: 70%;"></div><div style="width: 5%; background-color: #90ee90;"></div><div style="width: 25%;"></div></div> 1.79e8 |

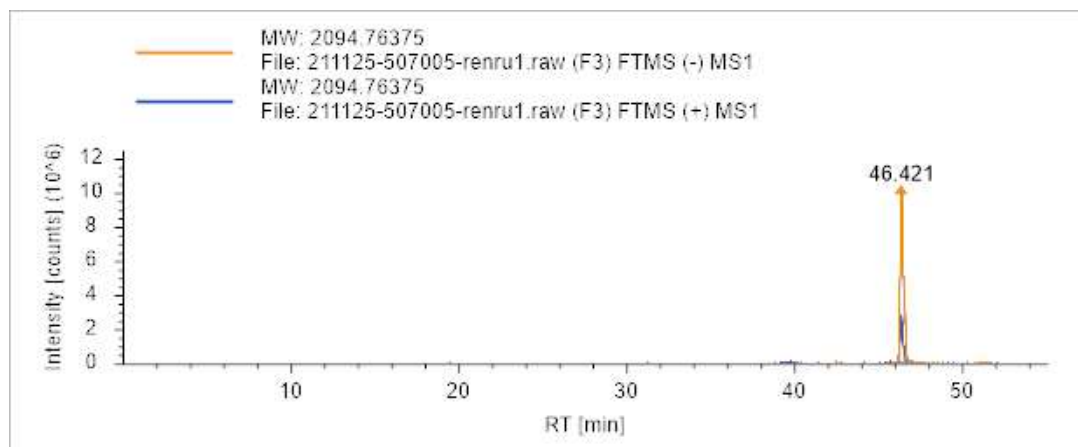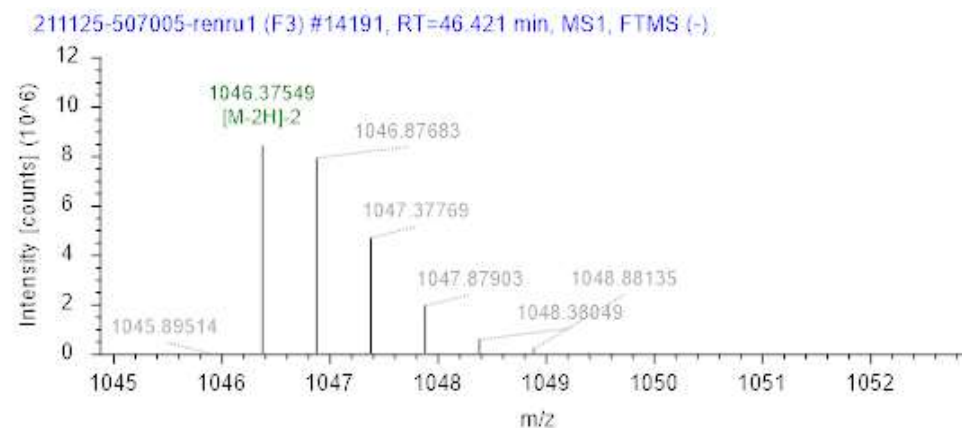

211125-507005-renru1 (F3) #14204, RT=46.458 min, MS2, FTMS (-), (HCD, DDA, 1046.3755@30, -2)

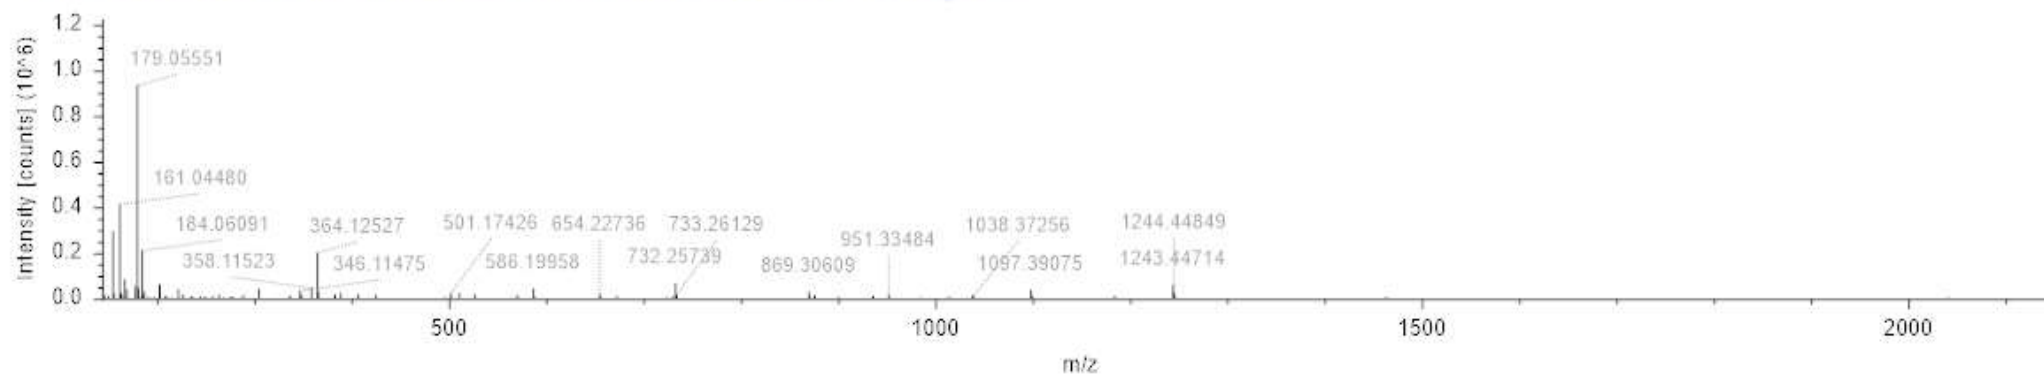



| Structure | Name | RT [min] | Formula | Calc. MW   | Areas  |
|-----------|------|----------|---------|------------|--------|
| n/a       |      | 46.50    | n/a     | 2128.81064 | 9.25e7 |

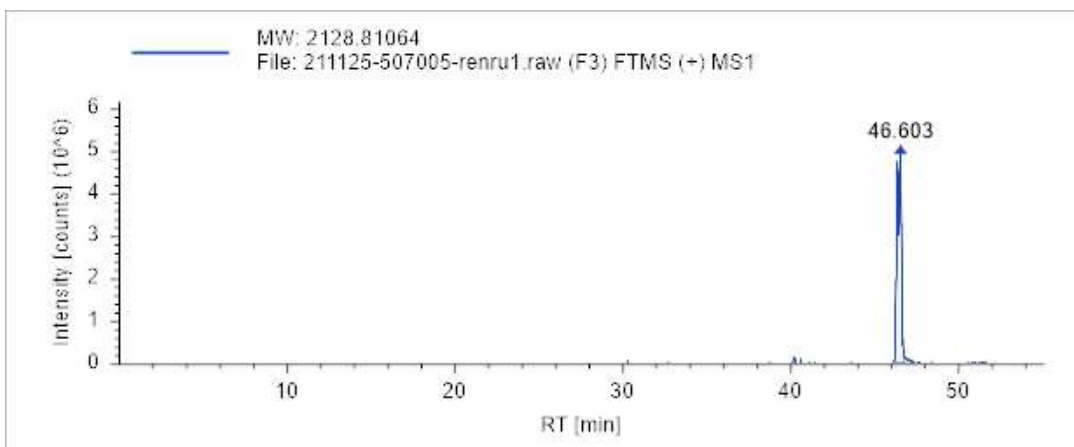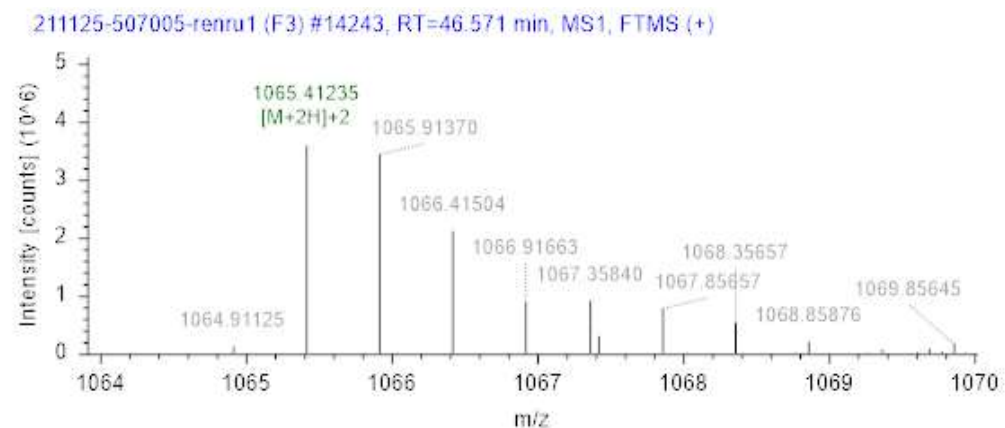

211125-507005-renru1 (F3) #14255, RT=46.607 min, MS2, FTMS (+), (HCD, DDA, 1065.4124@30, +2)

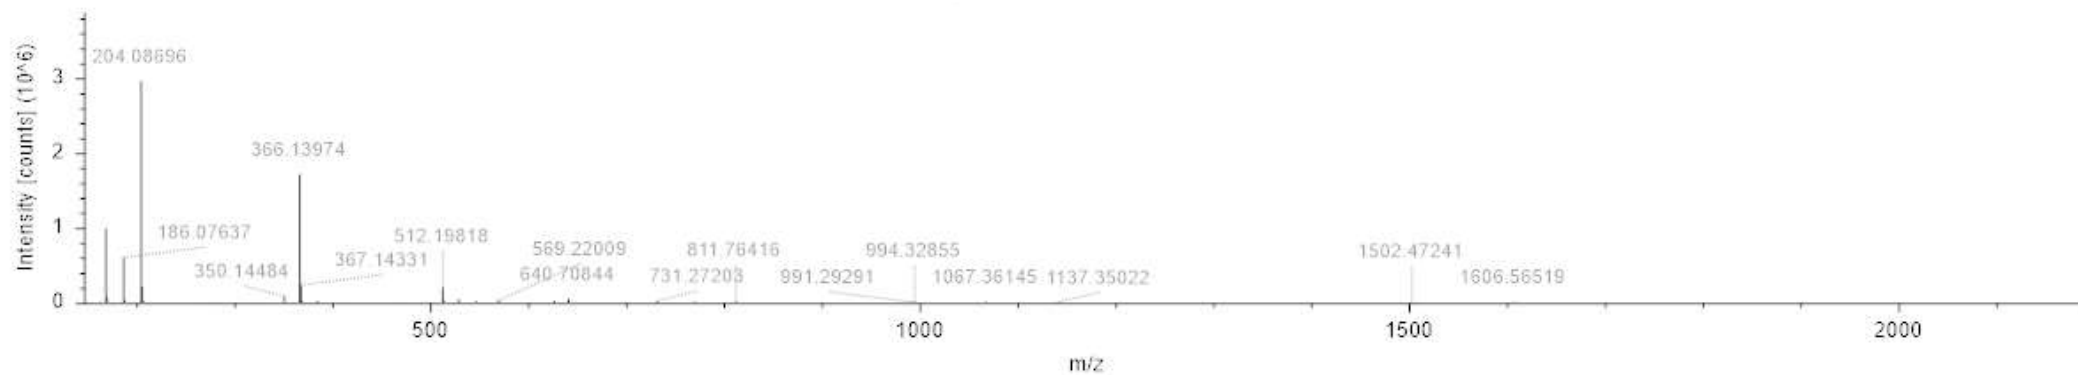



| Structure | Name | RT [min] | Formula | Calc. MW   | Areas  |
|-----------|------|----------|---------|------------|--------|
| n/a       |      | 47.18    | n/a     | 2240.82339 | 5.42e7 |

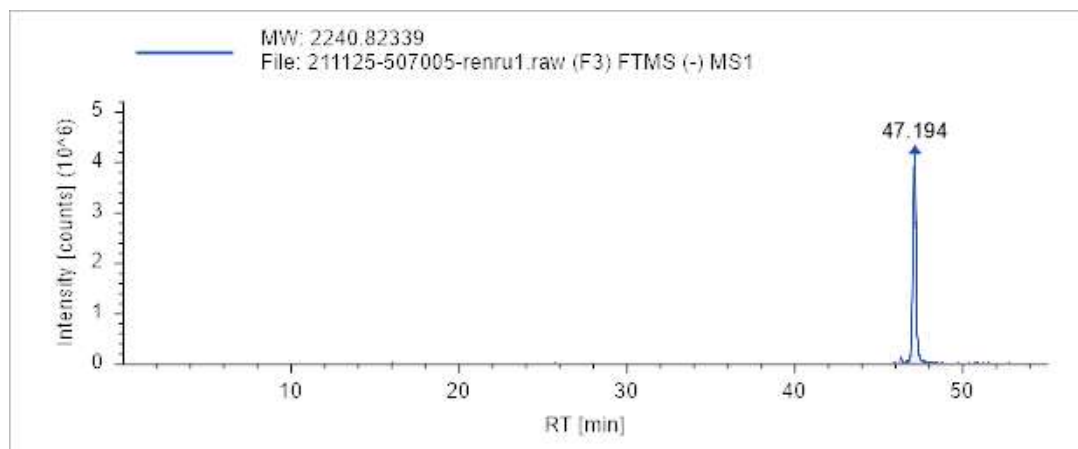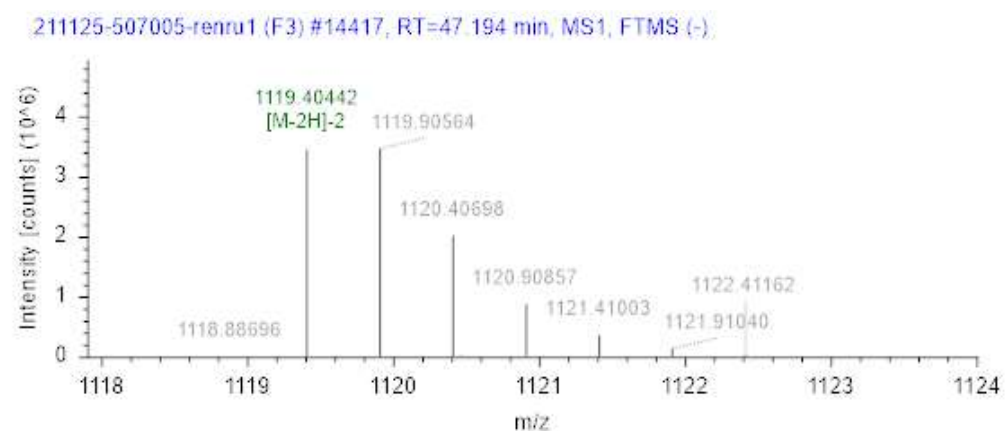

211125-507005-renru1 (F3) #14429, RT=47.231 min, MS2, FTMS (-), (HCD, DDA, 1119.9056@30, -2)

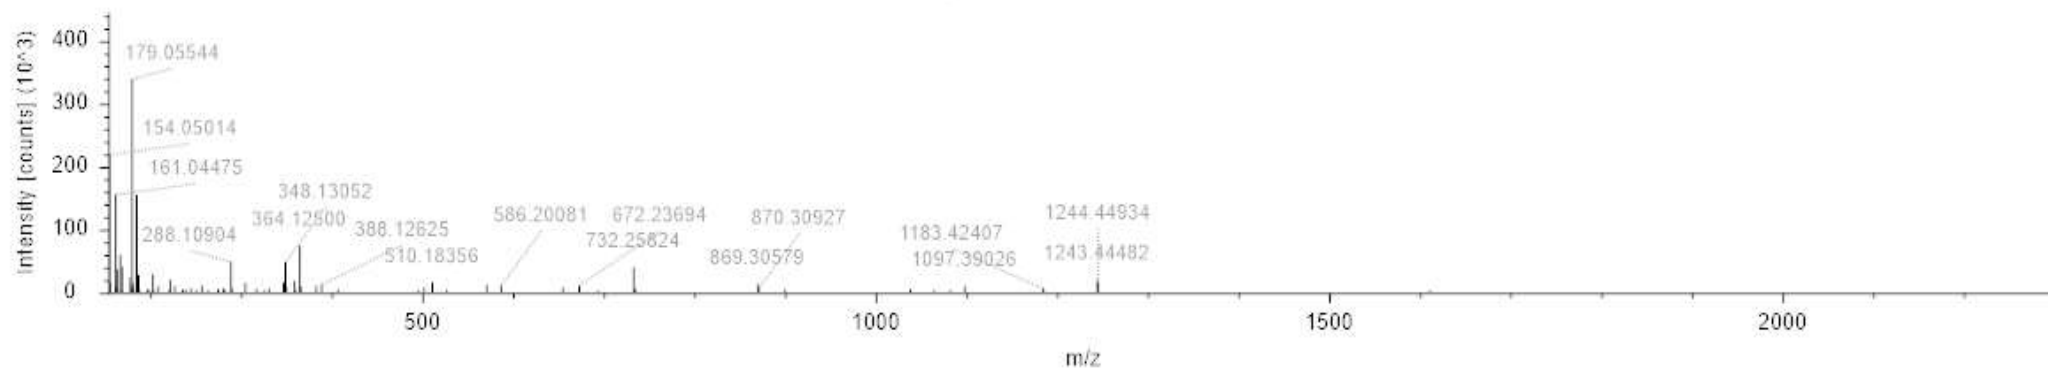

Supplement: mmc1.pdf [file mmc1.pdf]
