# Supplementary material for: Comparative analysis of oligosaccharides in the milk of human and animals by using LC-QE-HF-MS
Source: PubMed Central journal article supplement — Food Chem X. 2023 May 9;18:100705. doi: 10.1016/j.fochx.2023.100705 (PMC10314177; doi:10.1016/j.fochx.2023.100705), 2023-05-09

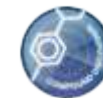

| Structure | Name | RT [min] | Formula | Calc. MW  | Areas |
|-----------|------|----------|---------|-----------|-------|
| n/a       |      | 39.61    | n/a     | 633.21017 |       |

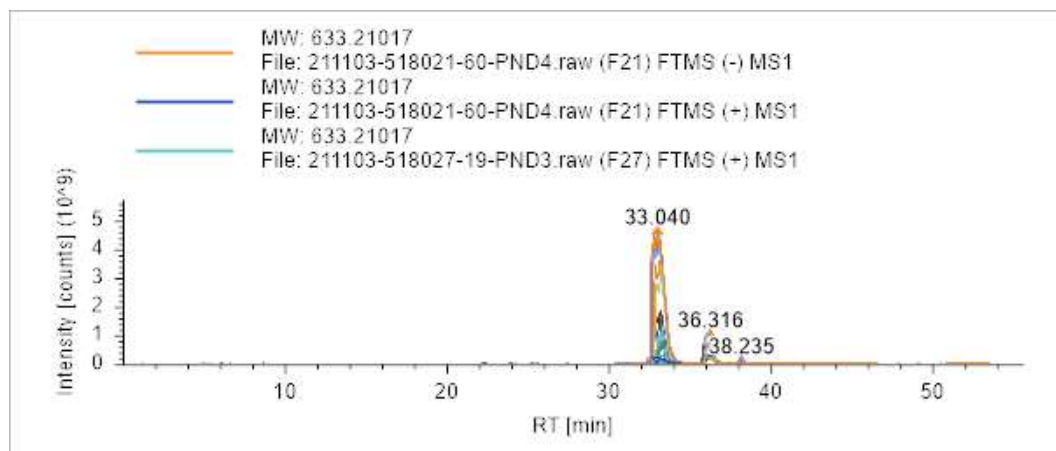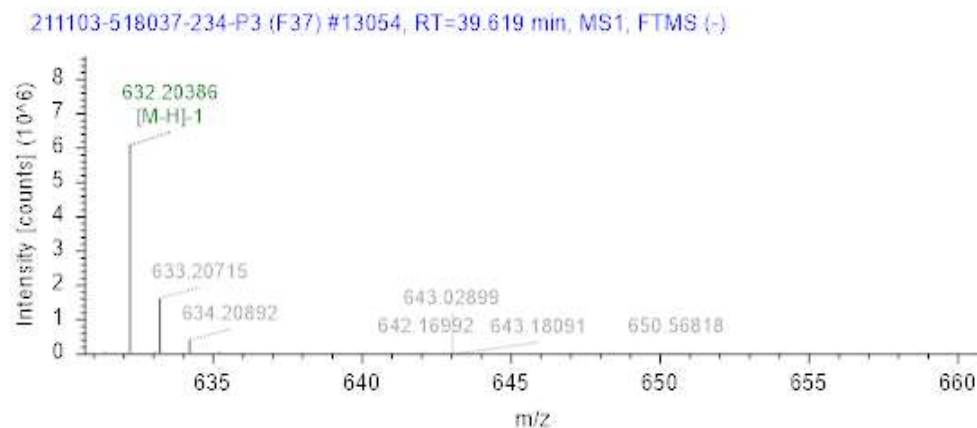

211103-518037-234-P3 (F37) #13032, RT=39.561 min, MS2, FTMS (-), (HCD, DDA, 632.2043@30, -1)

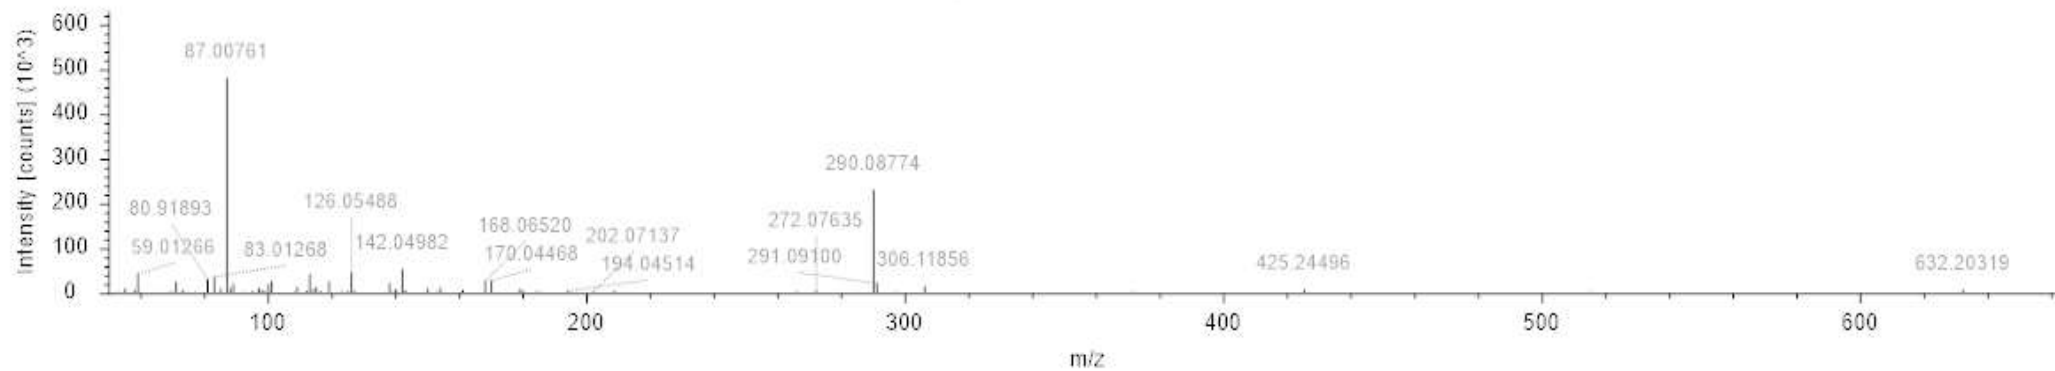



| Structure | Name | RT [min] | Formula | Calc. MW  | Areas |
|-----------|------|----------|---------|-----------|-------|
| n/a       |      | 36.03    | n/a     | 633.21056 |       |

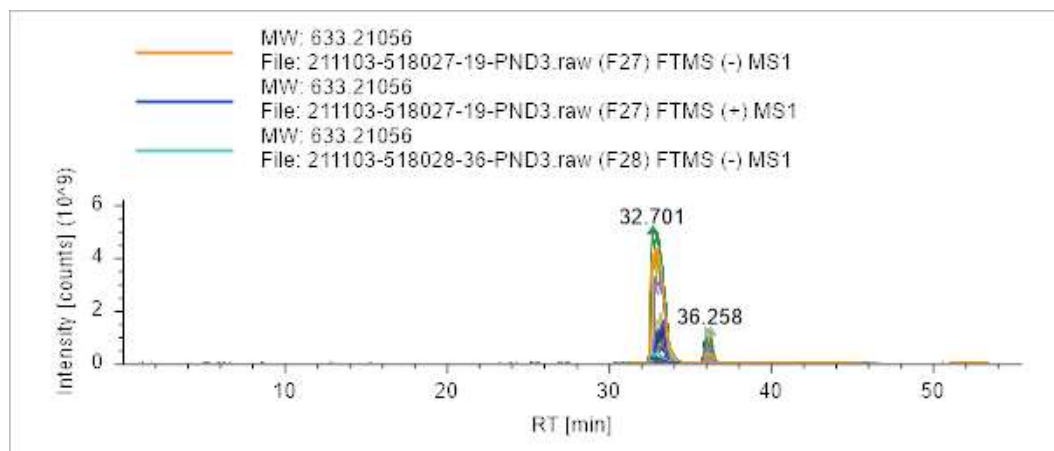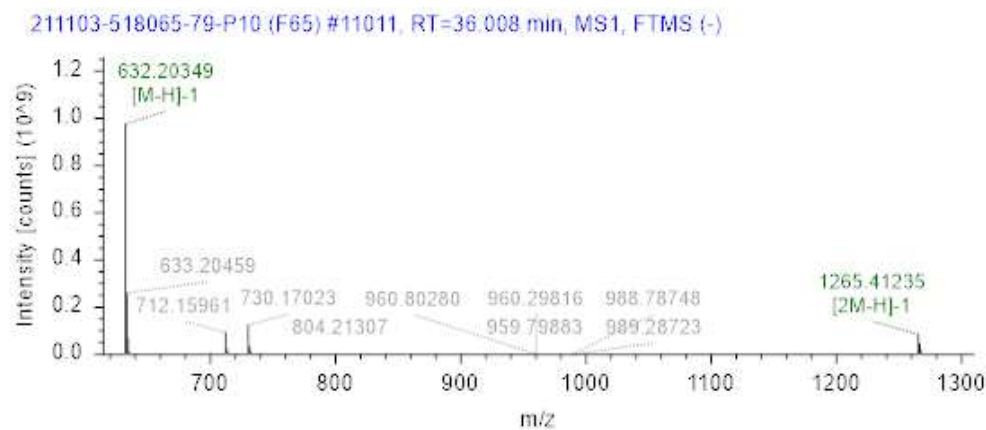

211103-518065-79-P10 (F65) #11036, RT=36.066 min, MS2, FTMS (-), (HCD, DDA, 632.2035@30, -1)

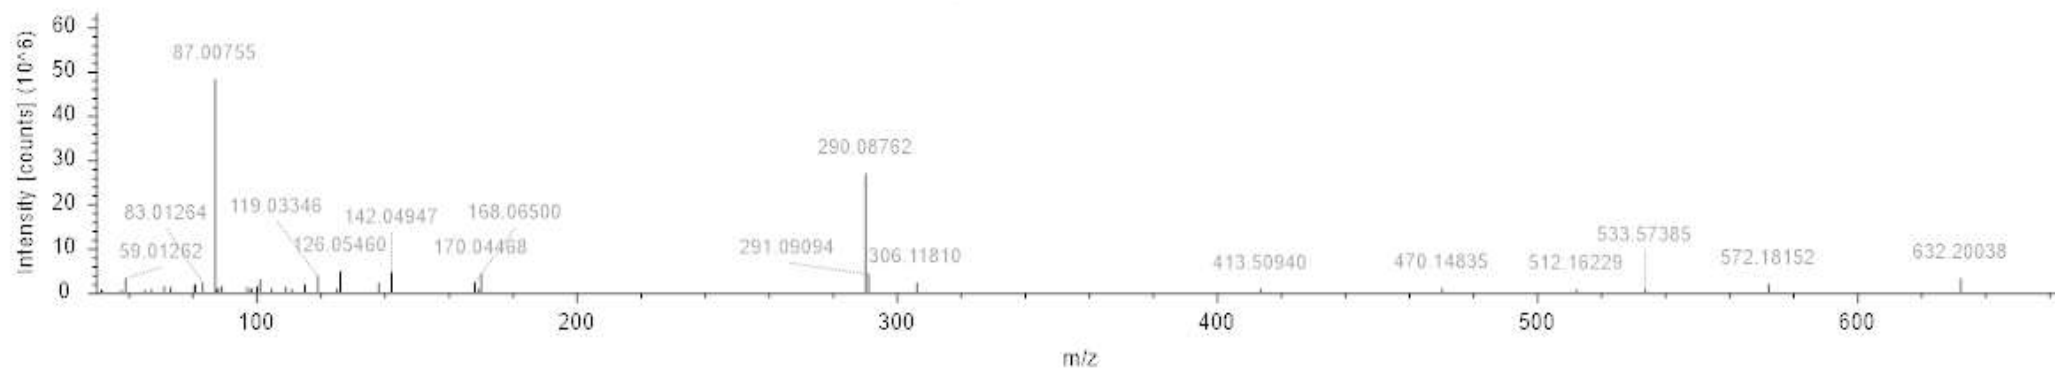



| Structure | Name | RT [min] | Formula | Calc. MW  | Areas |
|-----------|------|----------|---------|-----------|-------|
| n/a       |      | 33.28    | n/a     | 633.21174 |       |

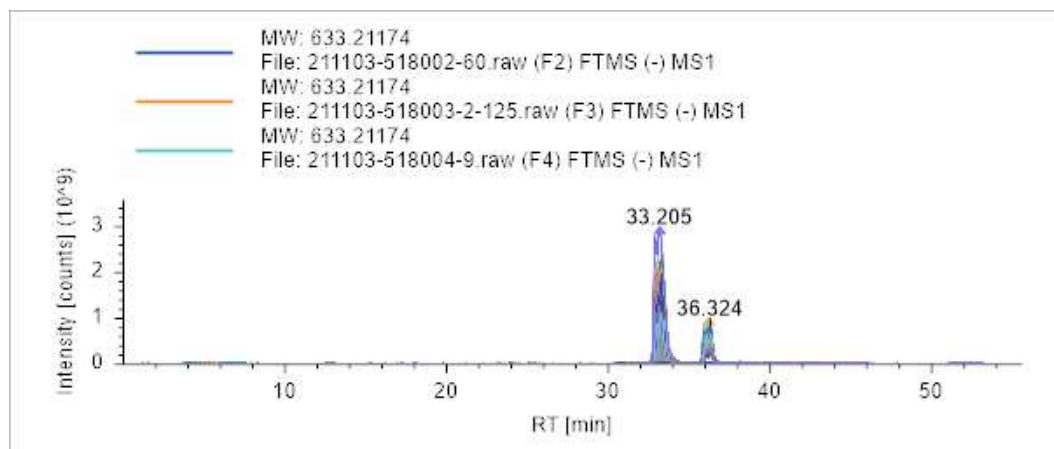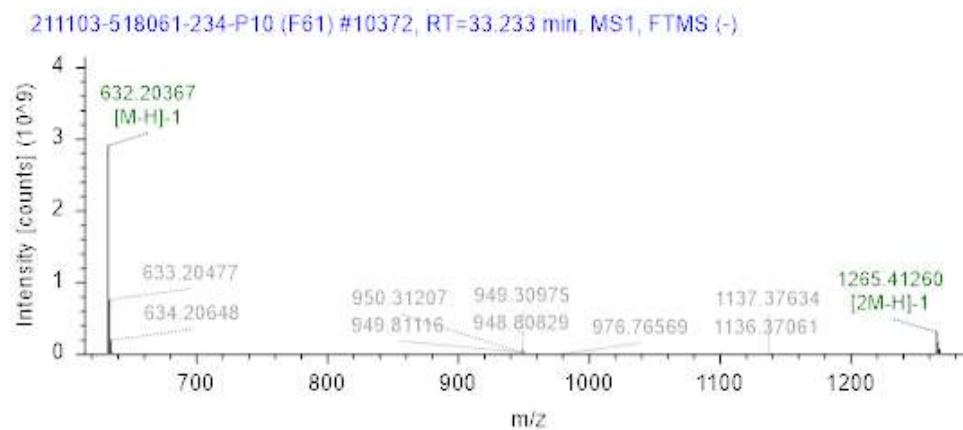

211103-518061-234-P10 (F61) #10373, RT=33.235 min, MS2, FTMS (-), (HCD, DDA, 632.7025@30, -1)

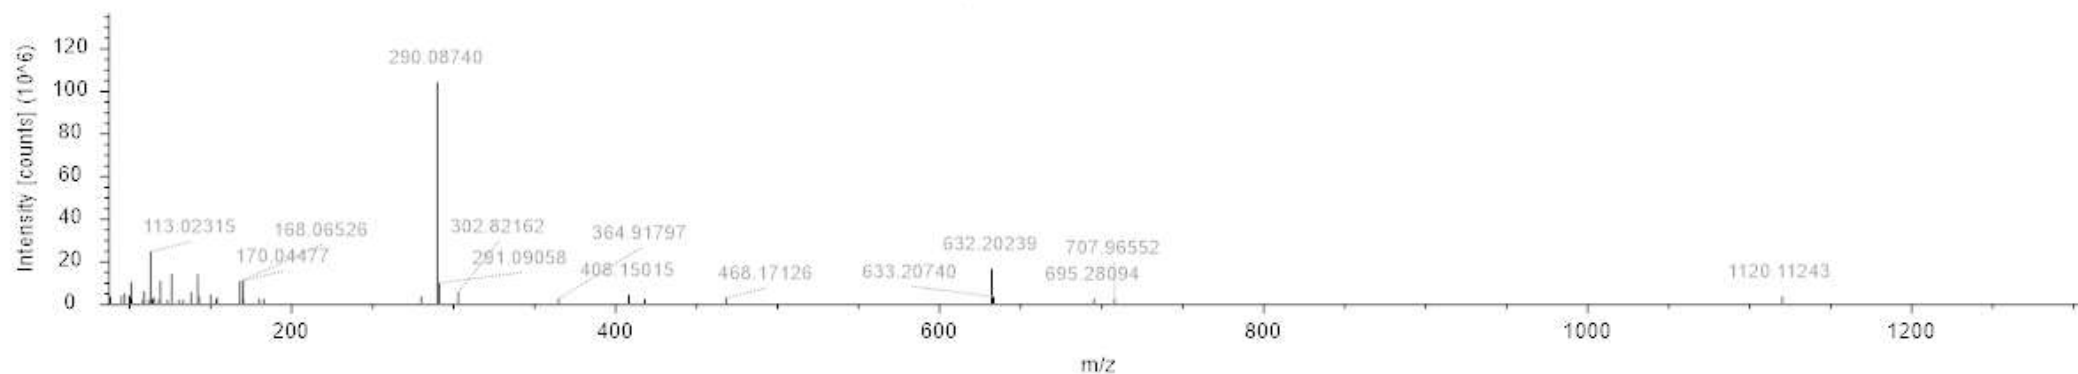



| Structure | Name | RT [min] | Formula | Calc. MW  | Areas |
|-----------|------|----------|---------|-----------|-------|
| n/a       |      | 39.09    | n/a     | 649.20553 |       |

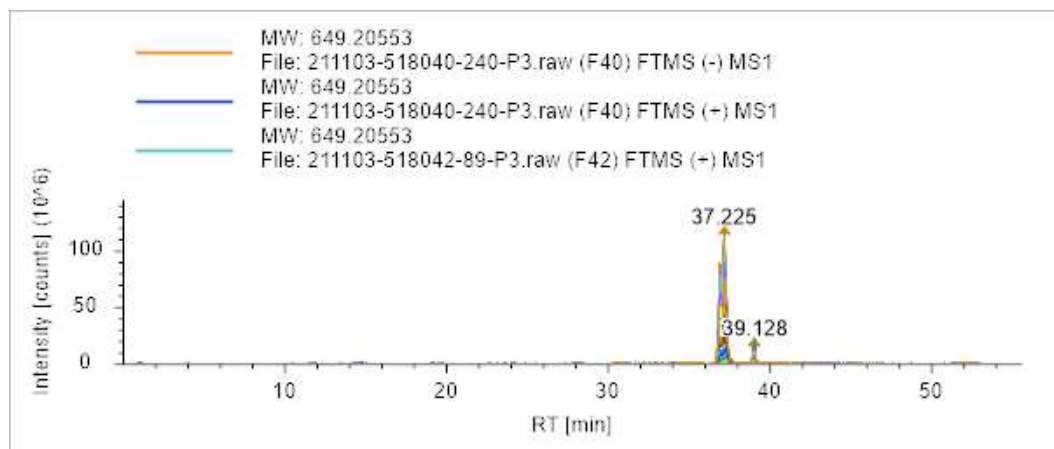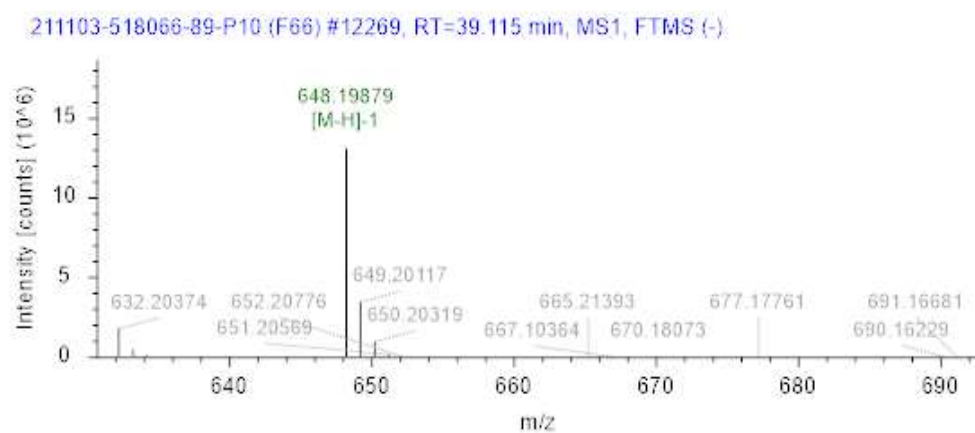

211103-518066-89-P10 (F66) #12260, RT=39.093 min, MS2, FTMS (-), (HCD, DDA, 648.1990@30, -1)

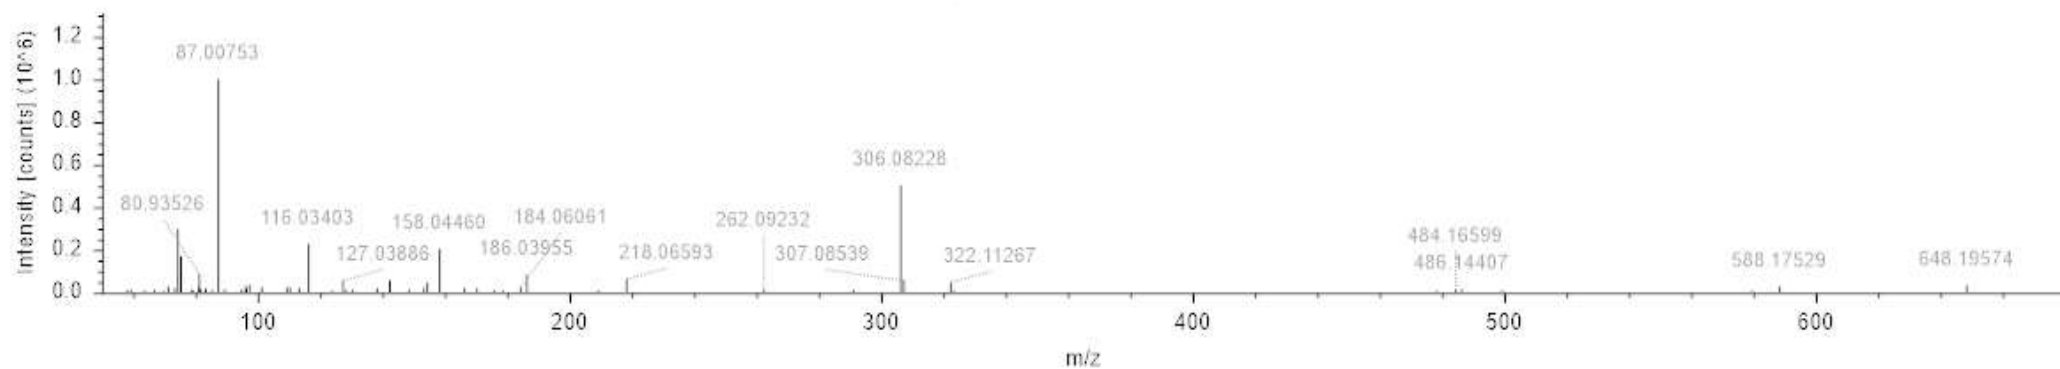



| Structure | Name | RT [min] | Formula | Calc. MW  | Areas |
|-----------|------|----------|---------|-----------|-------|
| n/a       |      | 36.96    | n/a     | 649.20665 |       |

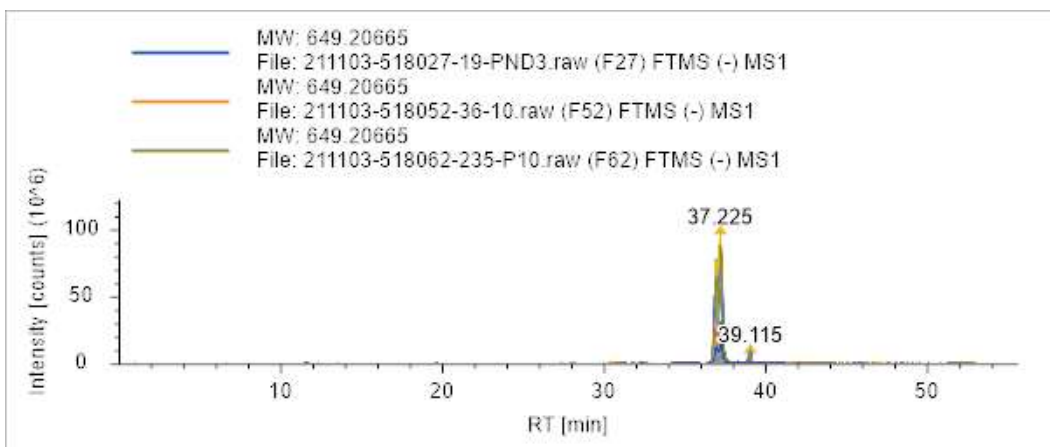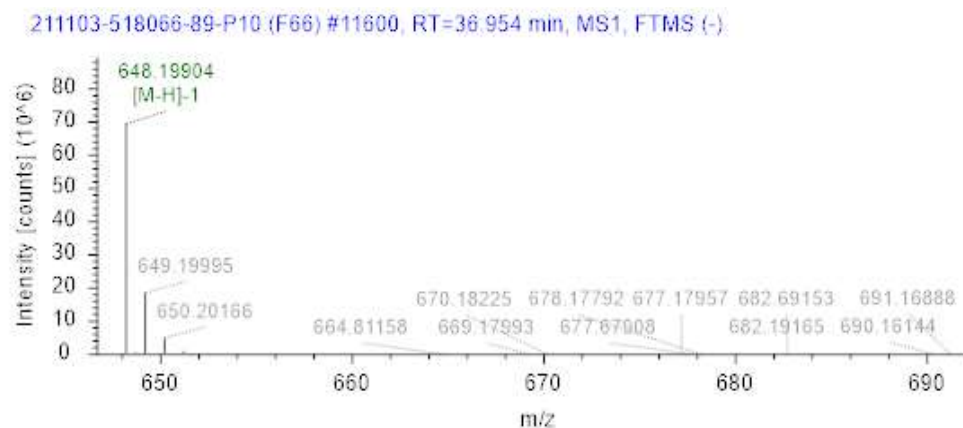

211103-518066-89-P10 (F66) #11637, RT=37.037 min, MS2, FTMS (-), (HCD, DDA, 648.1992@30, -1)

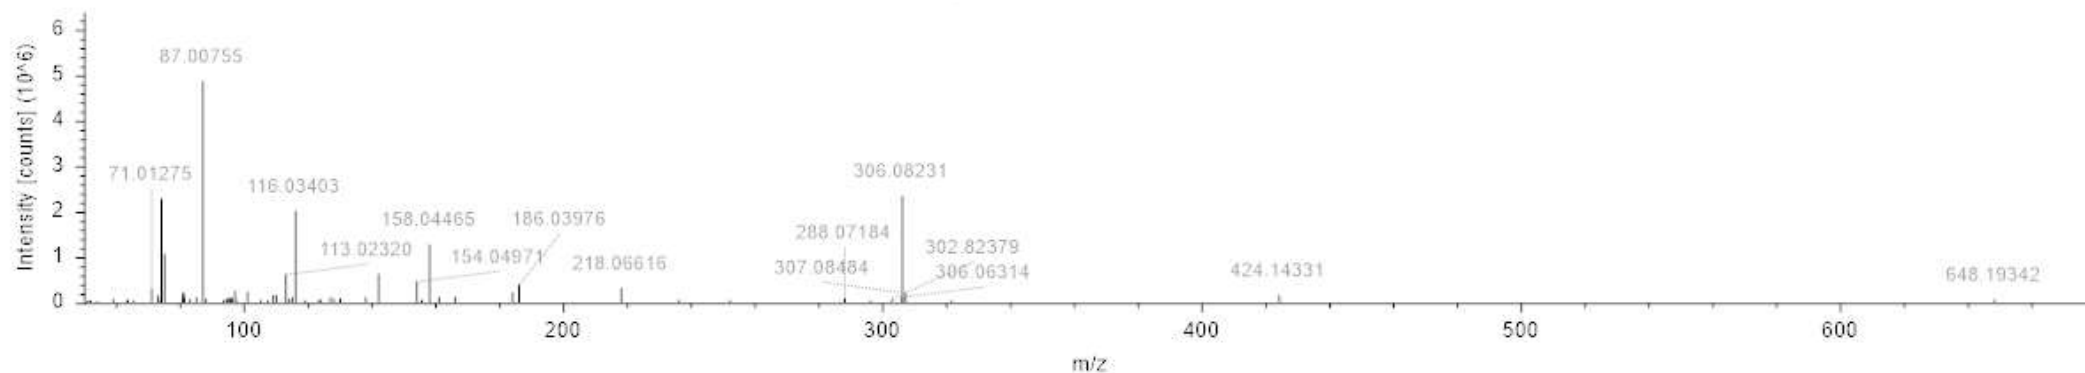



| Structure | Name | RT [min] | Formula | Calc. MW  | Areas |
|-----------|------|----------|---------|-----------|-------|
| n/a       |      | 39.73    | n/a     | 836.28940 |       |

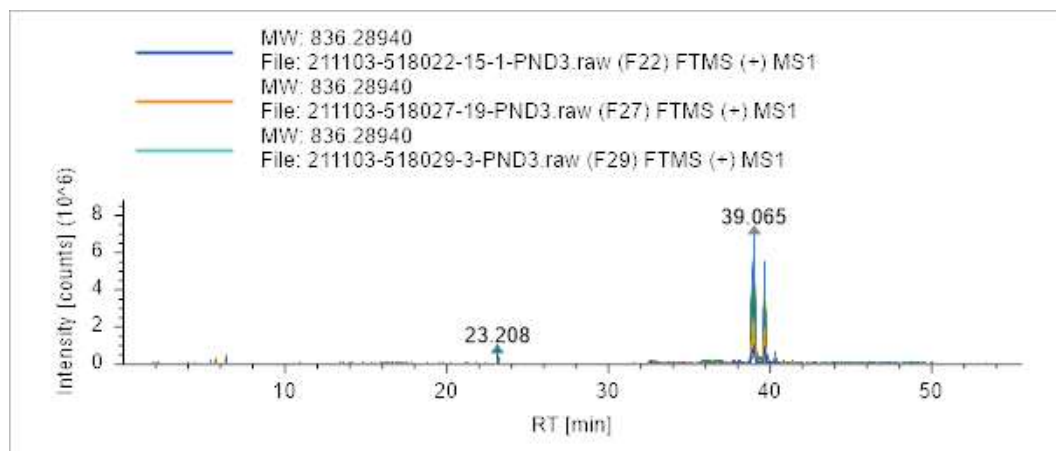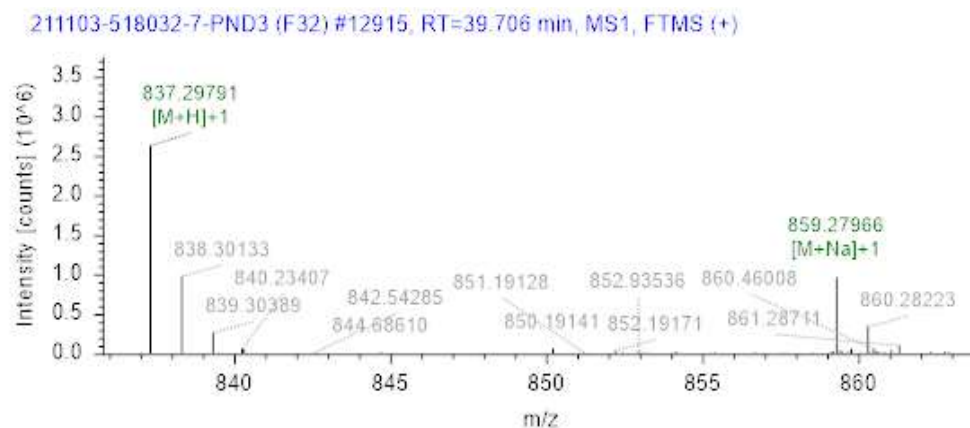

211103-518032-7-PND3 (F32) #12888, RT=39.631 min, MS2, FTMS (+), (HCD, DDA, 837.2964@30, +1)

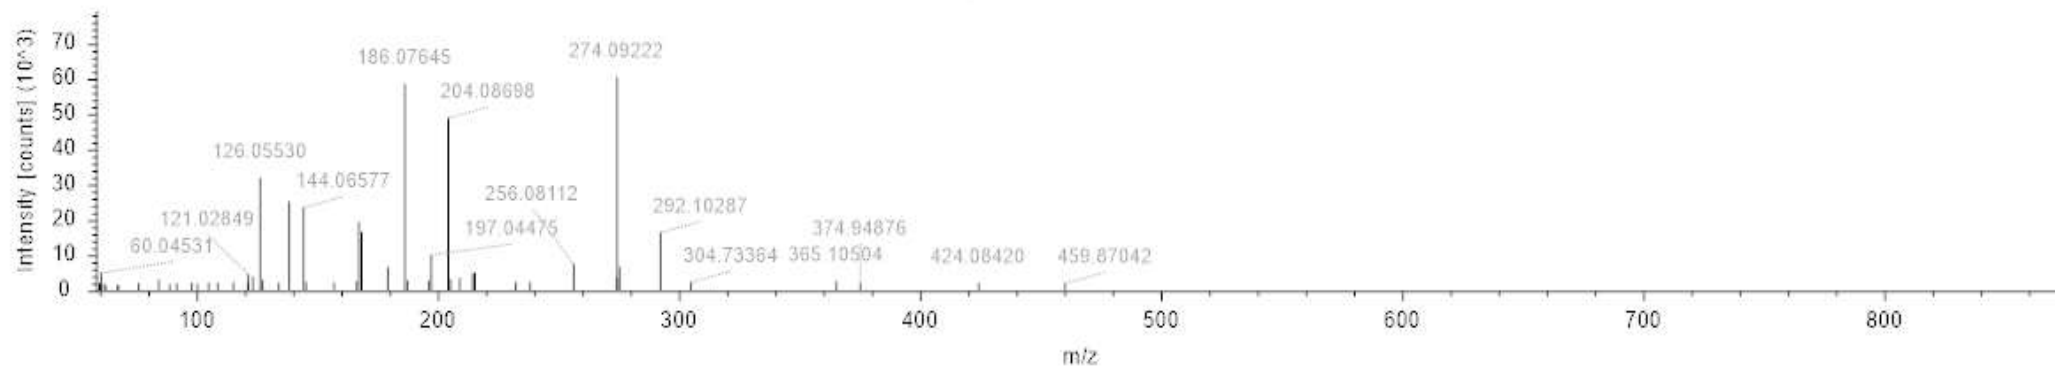



| Structure | Name | RT [min] | Formula | Calc. MW  | Areas |
|-----------|------|----------|---------|-----------|-------|
| n/a       |      | 39.04    | n/a     | 836.29114 |       |

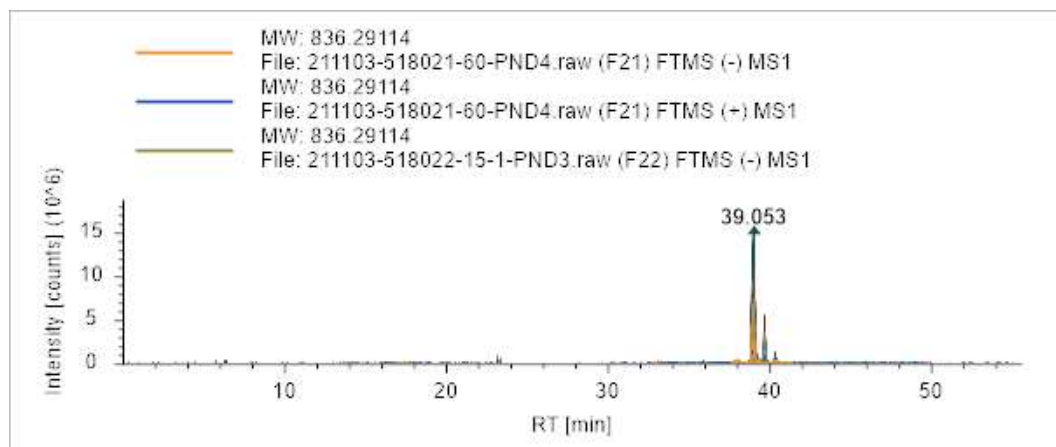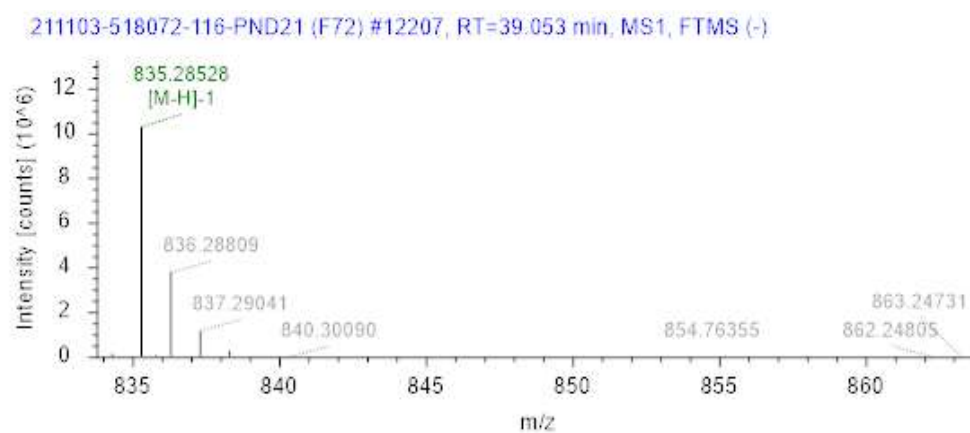

211103-518072-116-PND21 (F72) #12203, RT=39.033 min, MS2, FTMS (-), (HCD, DDA, 835.2853@30, -1)

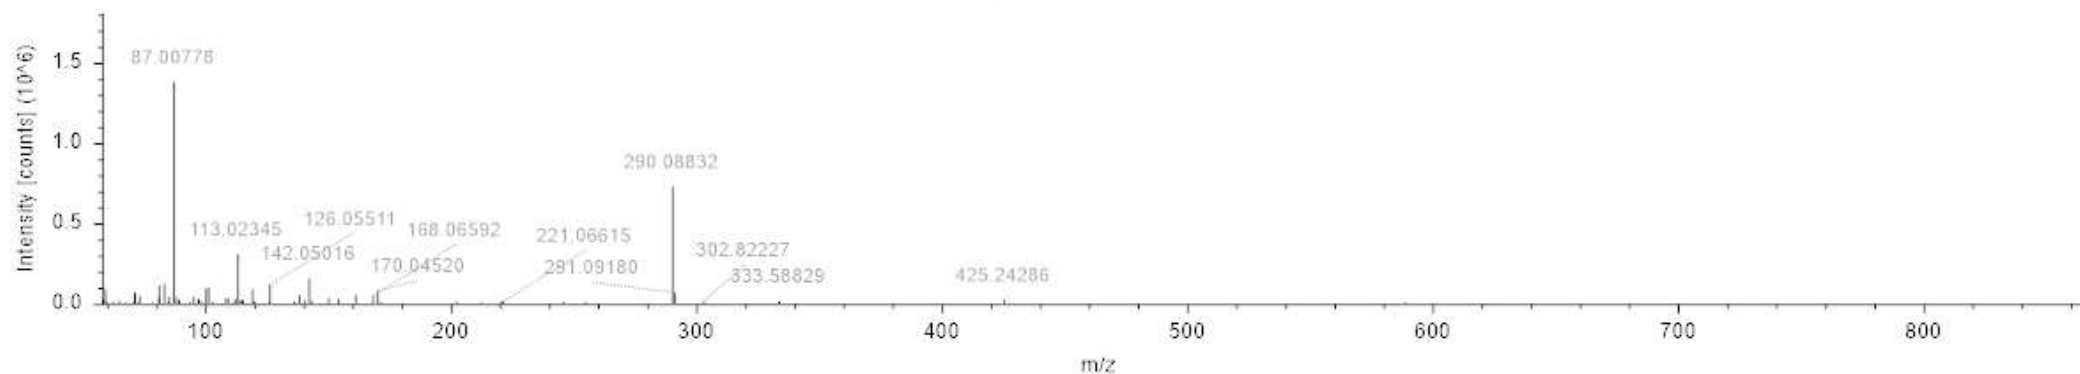



| Structure | Name | RT [min] | Formula | Calc. MW  | Areas |
|-----------|------|----------|---------|-----------|-------|
| n/a       |      | 40.37    | n/a     | 836.29285 |       |

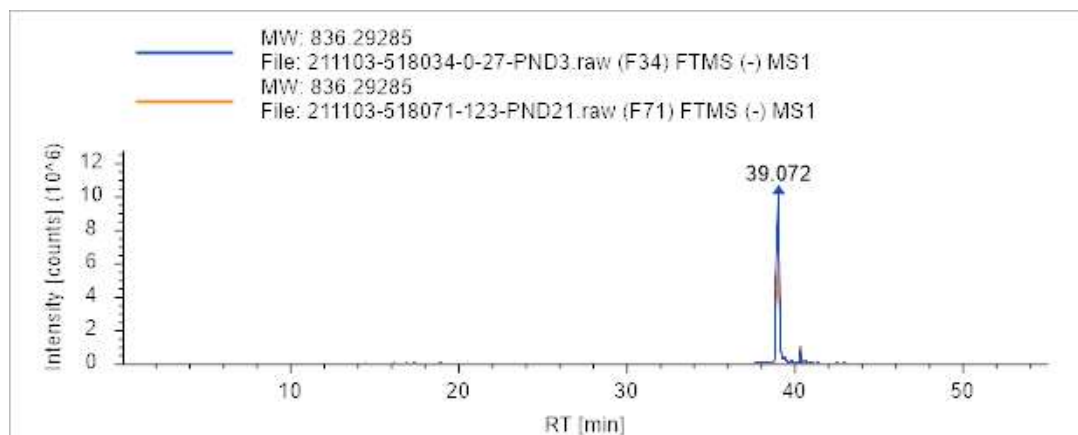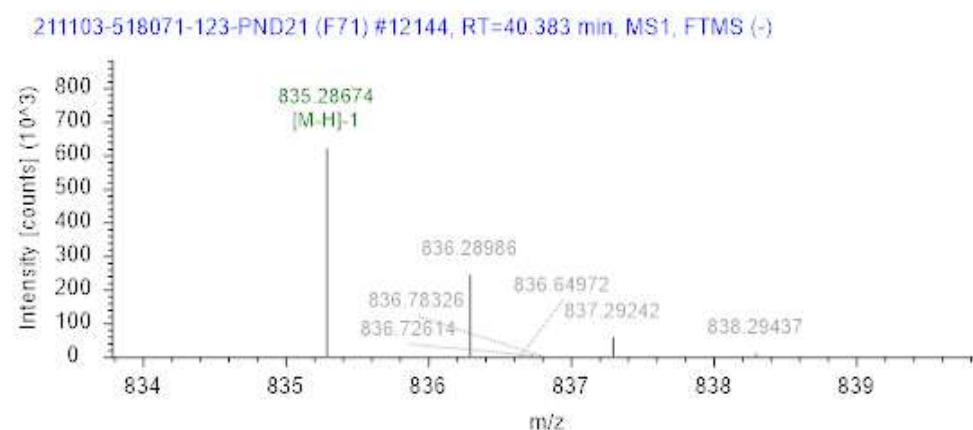

211103-518071-123-PND21 (F71) #12137, RT=40.347 min, MS2, FTMS (-), (HCD, DDA, 835.2865@30, -1)

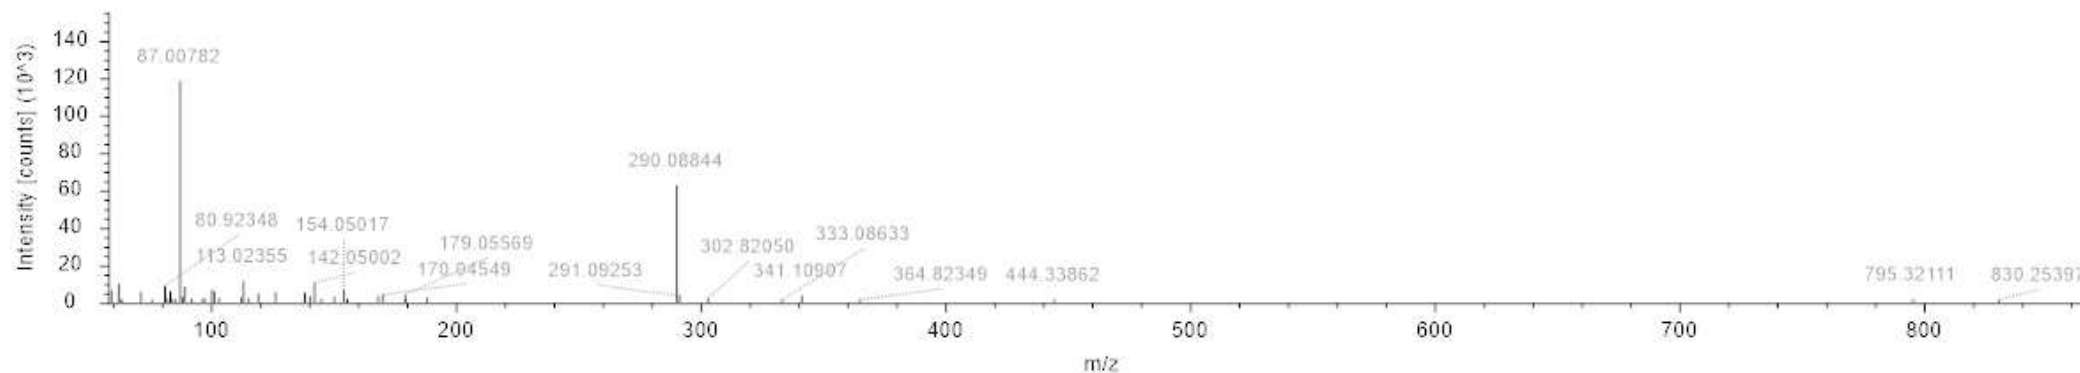







| Structure | Name | RT [min] | Formula | Calc. MW   | Areas |
|-----------|------|----------|---------|------------|-------|
| n/a       |      | 41.34    | n/a     | 1127.38447 |       |

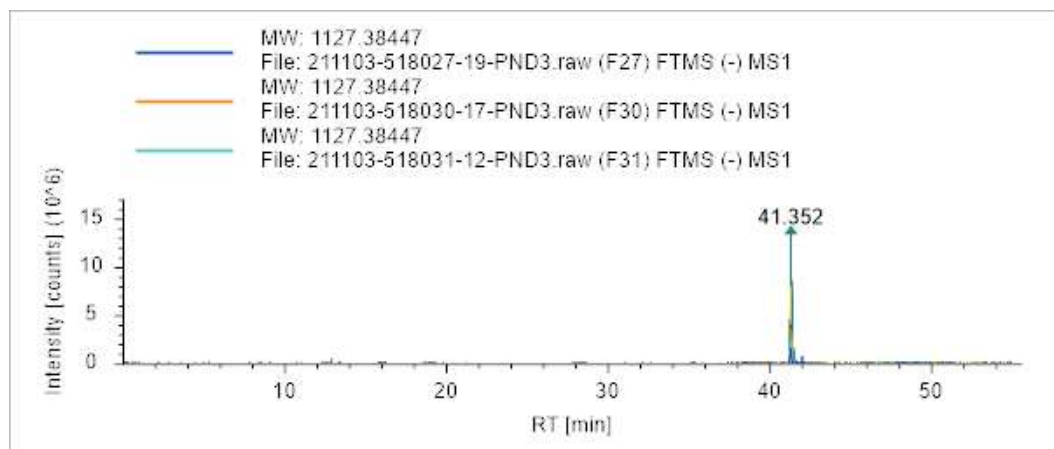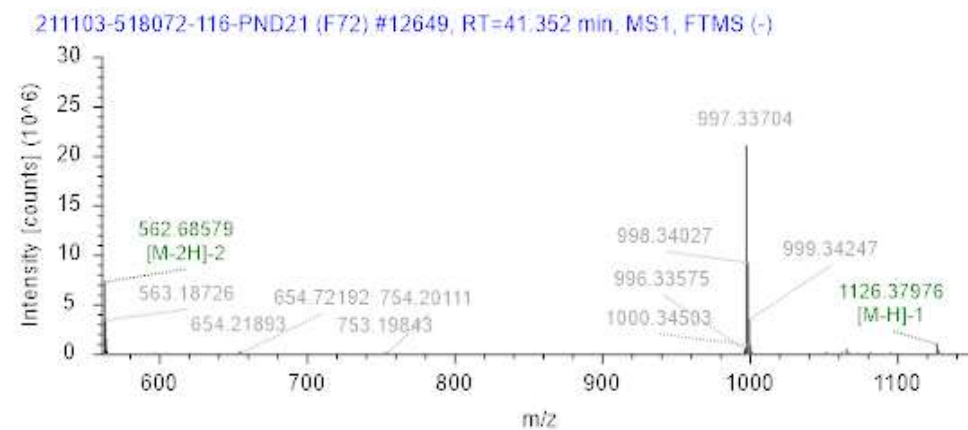

211103-518072-116-PND21 (F72) #12626, RT=41.289 min, MS2, FTMS (+), (HCD, DDA, 1128.3920@30, +1)

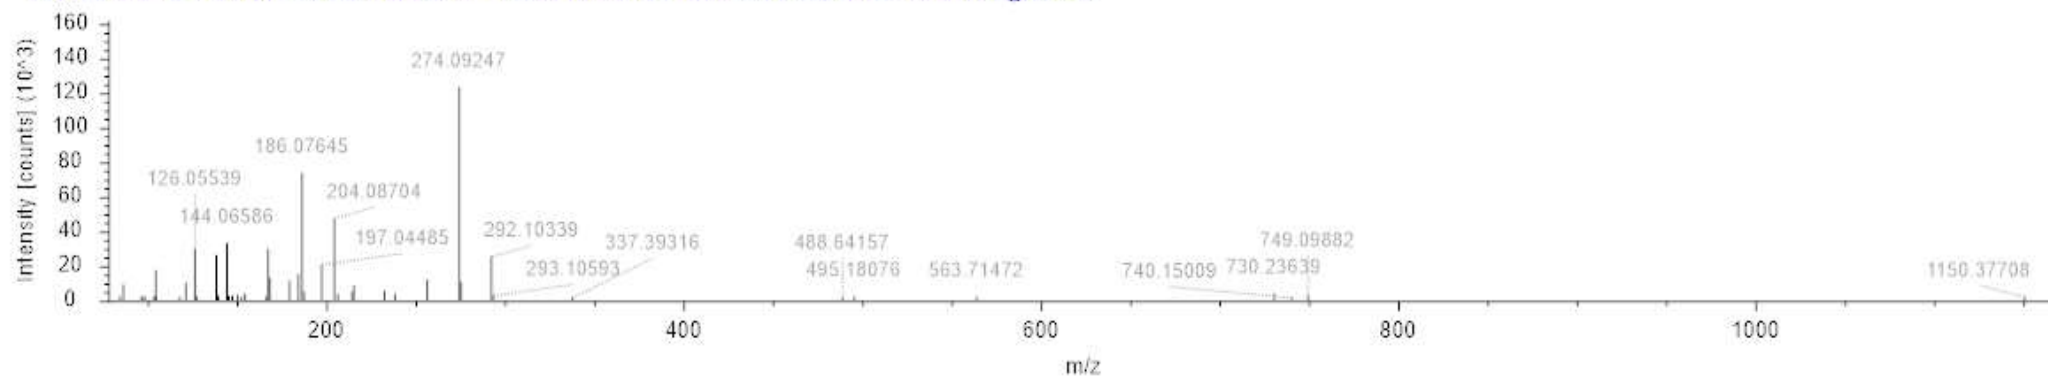



| Structure | Name | RT [min] | Formula | Calc. MW   | Areas |
|-----------|------|----------|---------|------------|-------|
| n/a       |      | 33.36    | n/a     | 1248.40865 |       |

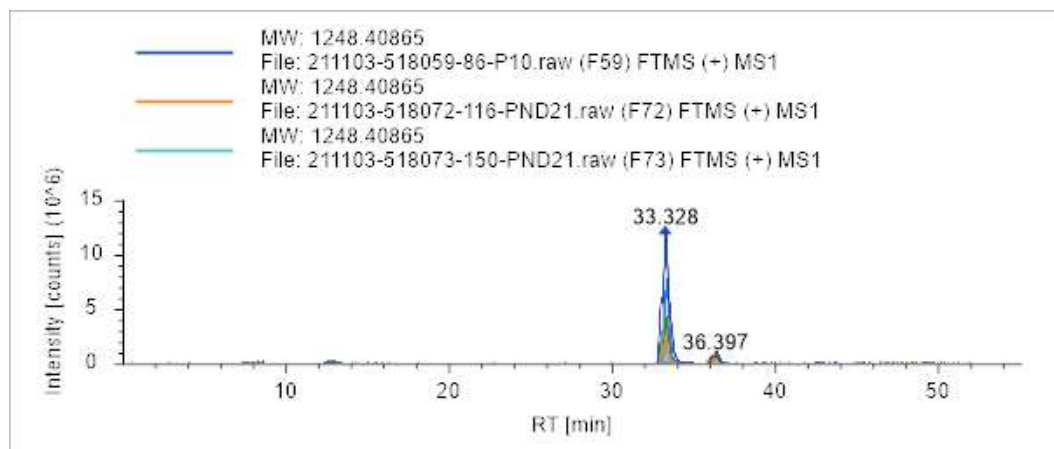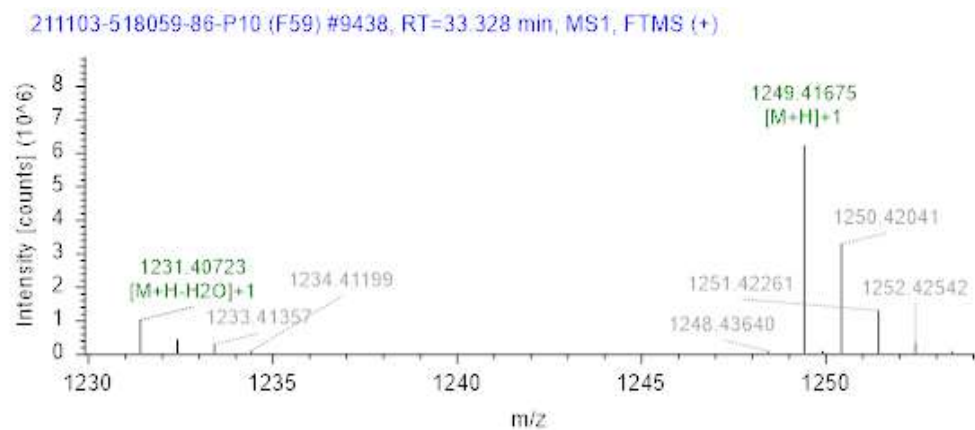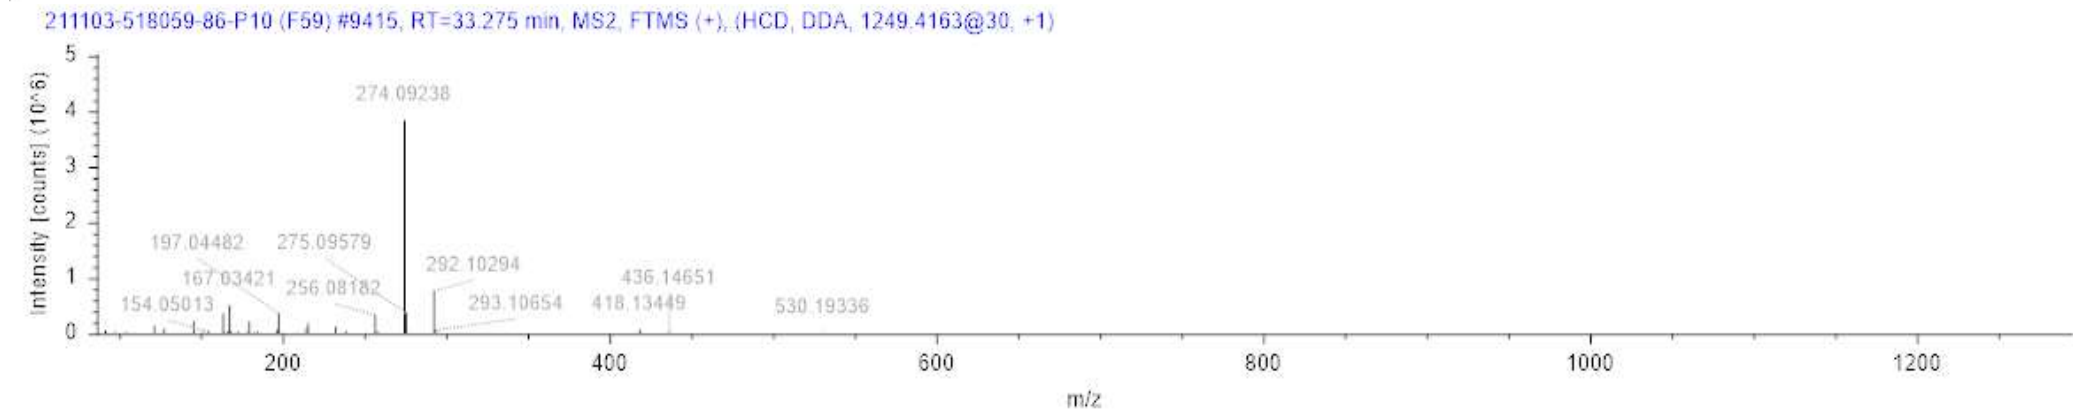



| Structure | Name | RT [min] | Formula | Calc. MW   | Areas |
|-----------|------|----------|---------|------------|-------|
| n/a       |      | 23.25    | n/a     | 1596.53221 |       |

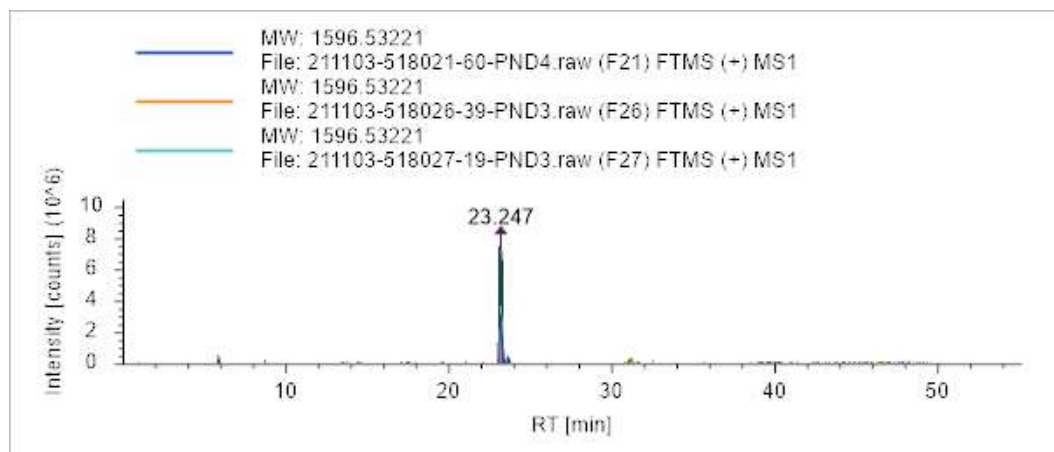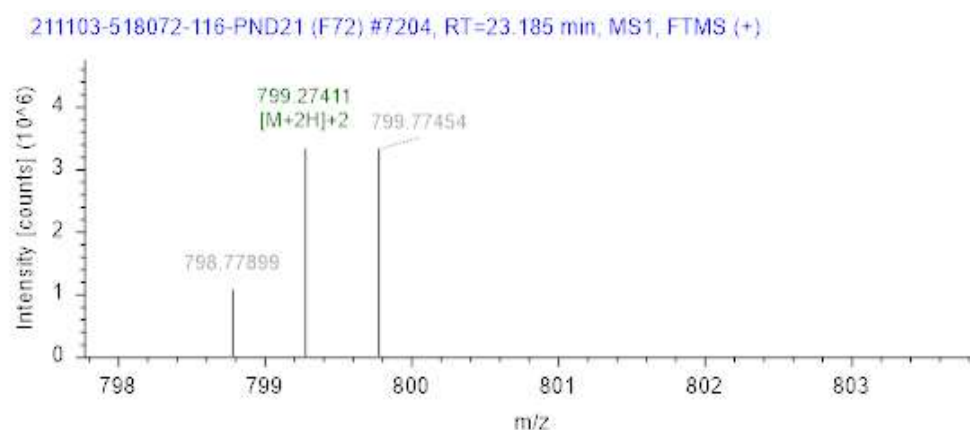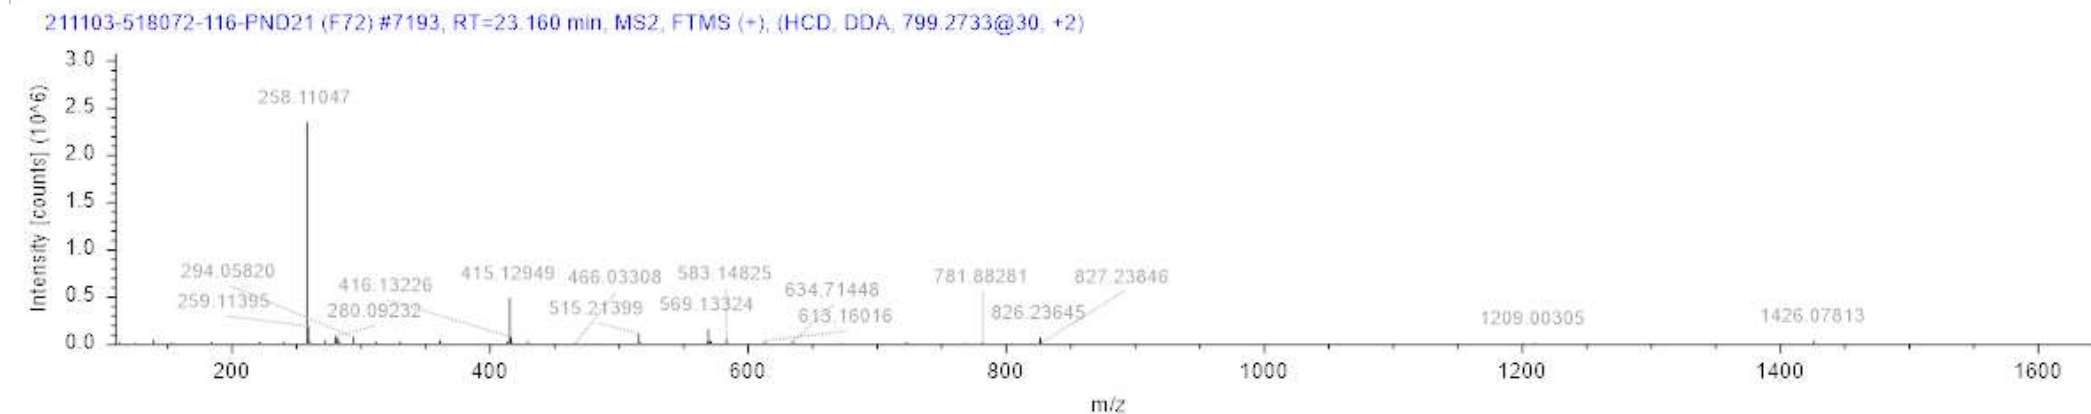



| Structure | Name | RT [min] | Formula | Calc. MW  | Areas  |        |        |        |  |  |
|-----------|------|----------|---------|-----------|--------|--------|--------|--------|--|--|
| n/a       |      | 36.96    | n/a     | 633.21110 | 3.32e8 | 8.33e8 | 6.47e9 | 4.92e8 |  |  |

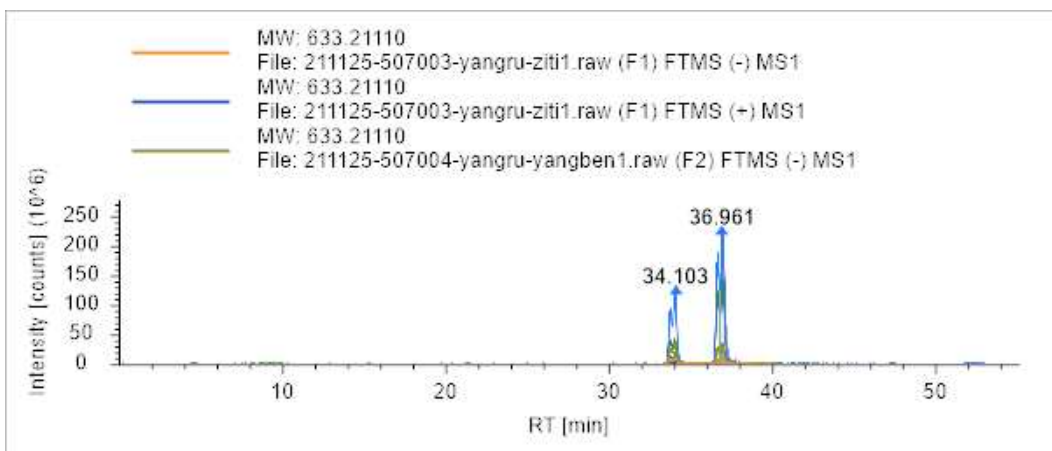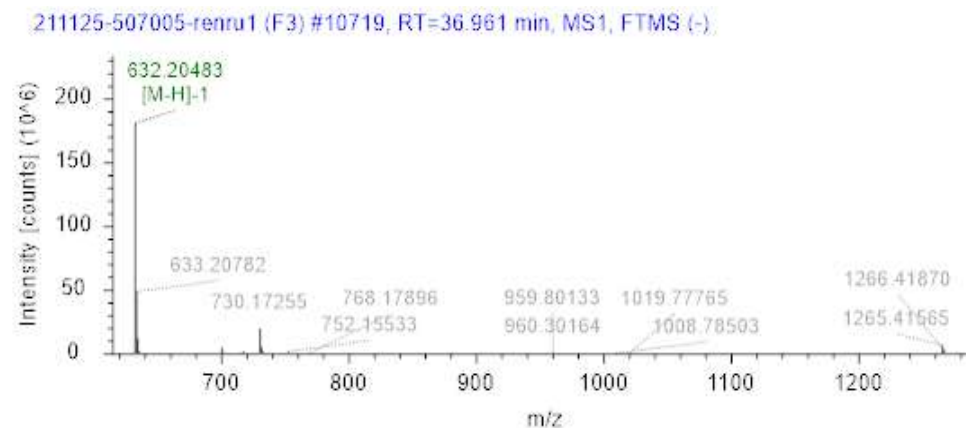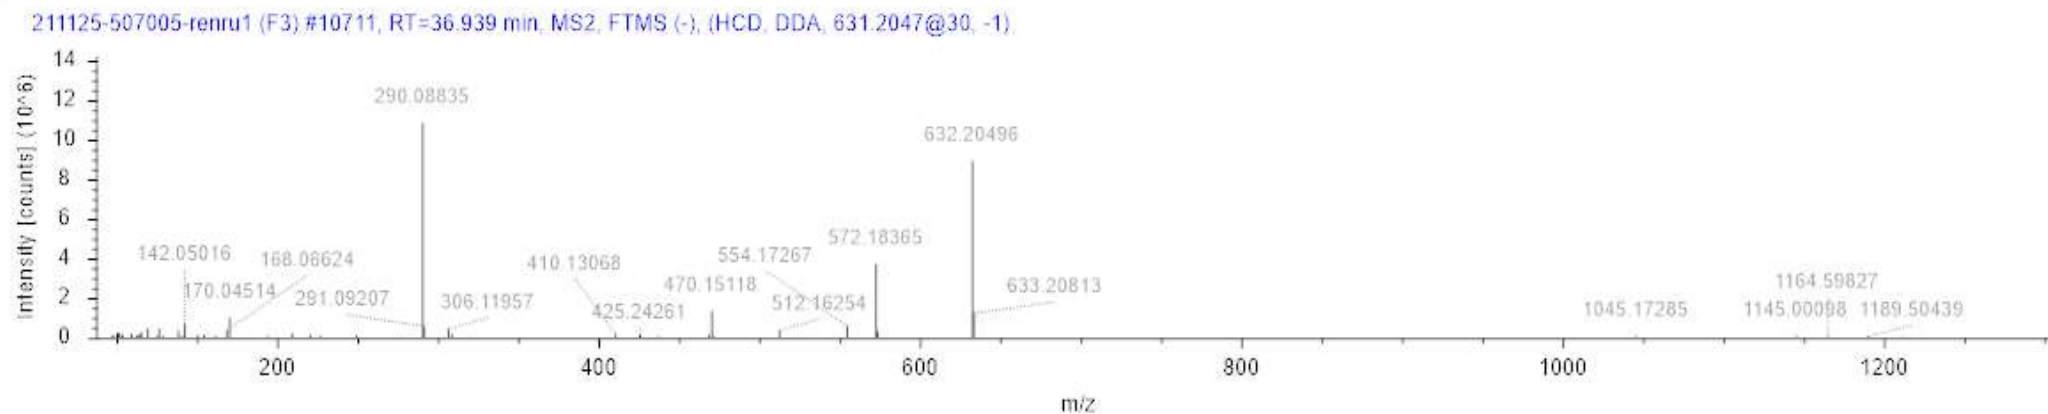



| Structure | Name | RT [min] | Formula | Calc. MW  | Areas                       |
|-----------|------|----------|---------|-----------|-----------------------------|
| n/a       |      | 34.05    | n/a     | 633.21236 | 1.78e8 7.55e8 2.30e9 2.19e9 |

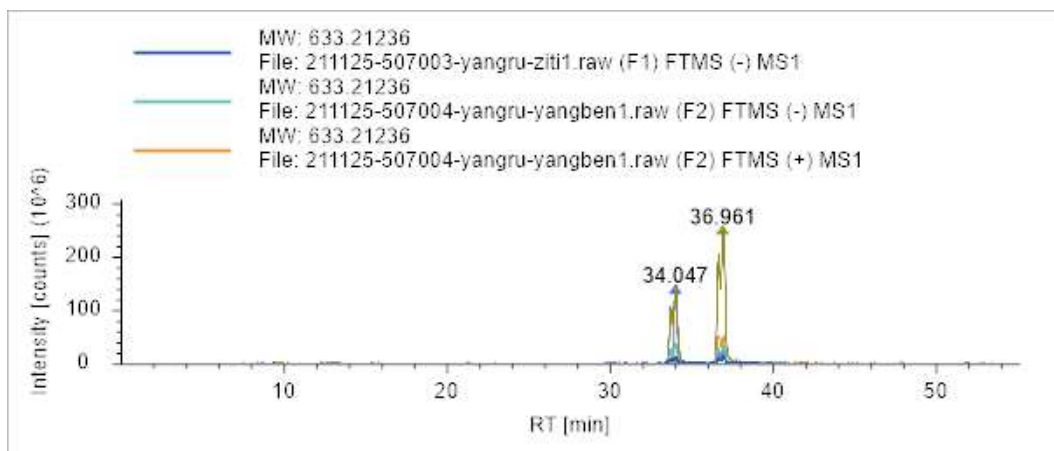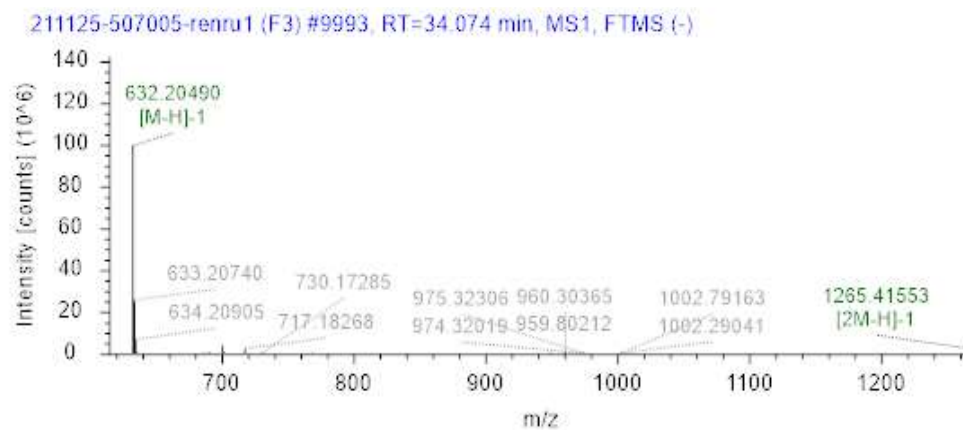

211125-507005-renru1 (F3) #9994, RT=34.077 min, MS2, FTMS (-), (HCD, DDA, 632.2050@30, -1)

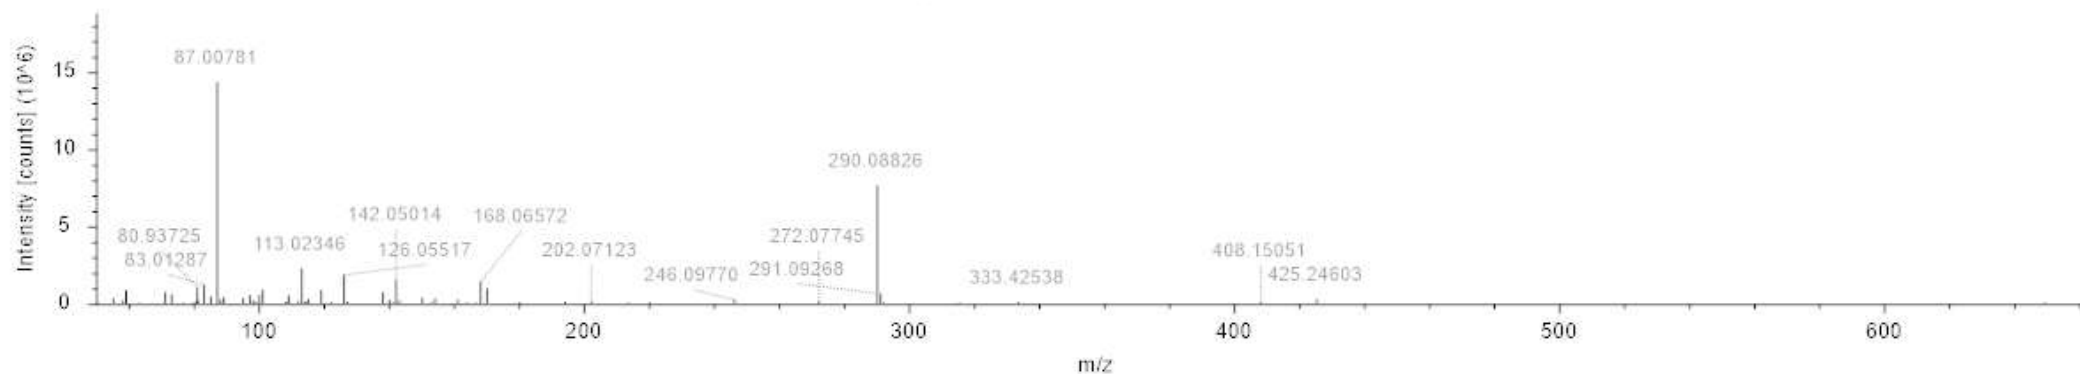



| Structure | Name   | RT [min] | Formula | Calc. MW  | Areas                                                                                                                      |        |        |        |        |  |  |
|-----------|--------|----------|---------|-----------|----------------------------------------------------------------------------------------------------------------------------|--------|--------|--------|--------|--|--|
| n/a       |        | 33.78    | n/a     | 633.21238 | <table border="1"> <tr> <td>9.63e7</td> <td>5.24e8</td> <td>1.23e9</td> <td>1.48e9</td> <td></td> <td></td> </tr> </table> | 9.63e7 | 5.24e8 | 1.23e9 | 1.48e9 |  |  |
| 9.63e7    | 5.24e8 | 1.23e9   | 1.48e9  |           |                                                                                                                            |        |        |        |        |  |  |

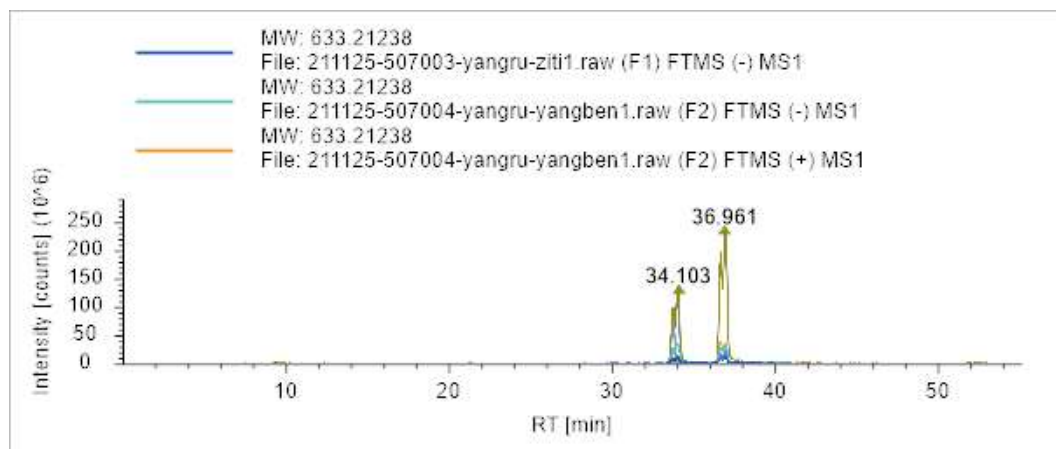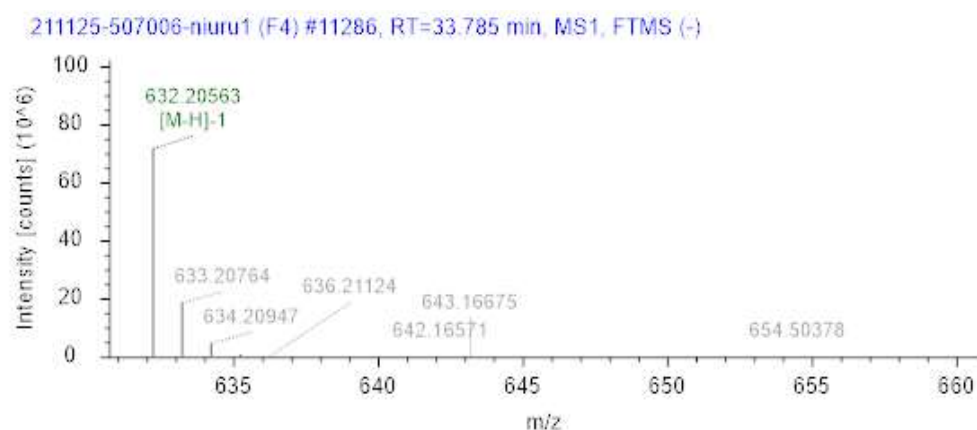

211125-507006-niuru1 (F4) #11323, RT=33.875 min, MS2, FTMS (-), (HCD, DDA, 632.2055@30, -1)

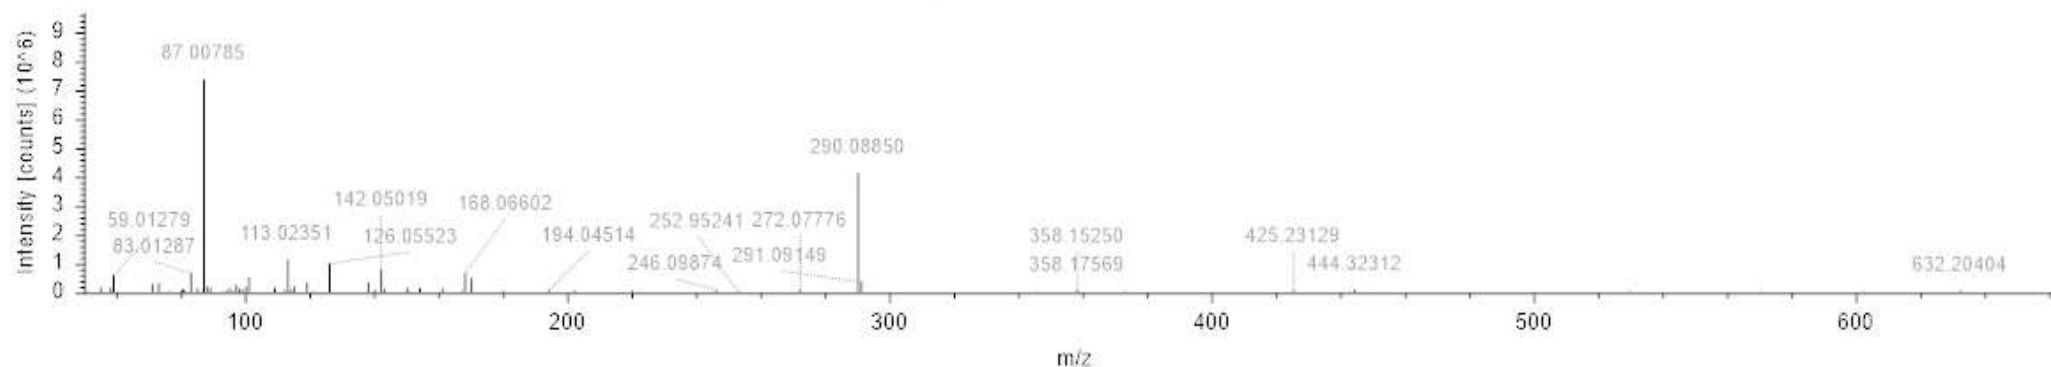



| Structure | Name | RT [min] | Formula | Calc. MW  | Areas         |
|-----------|------|----------|---------|-----------|---------------|
| n/a       |      | 39.26    | n/a     | 649.20671 | 1.79e8 5.07e8 |

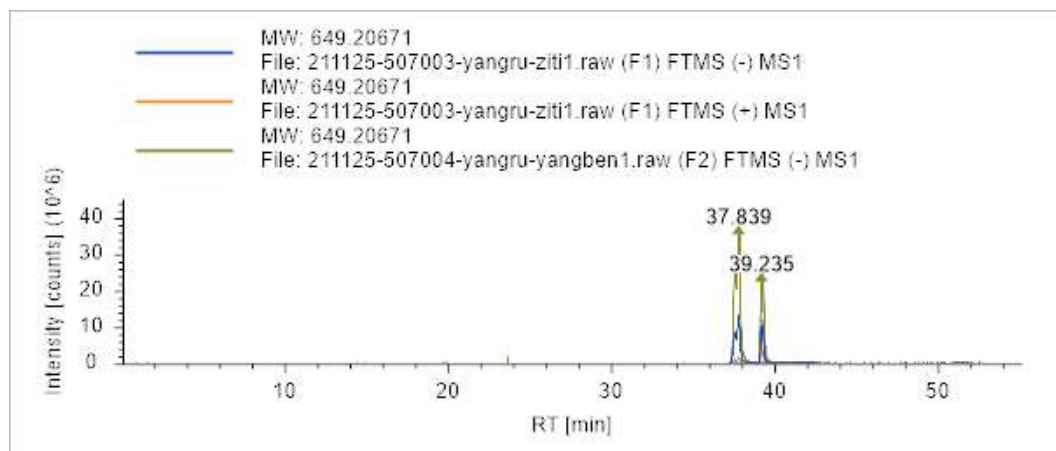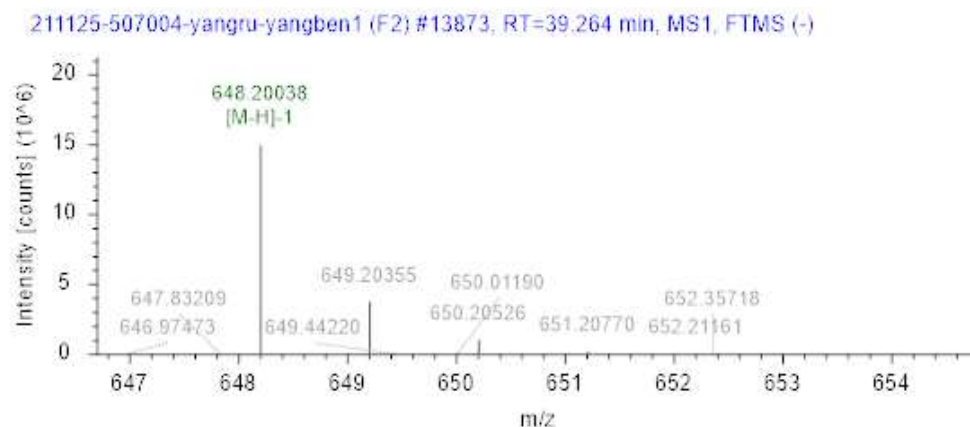

211125-507004-yangru-yangben1 (F2) #13896, RT=39.324 min, MS2, FTMS (-), (HCD, DDA, 648.2007@30, -1)

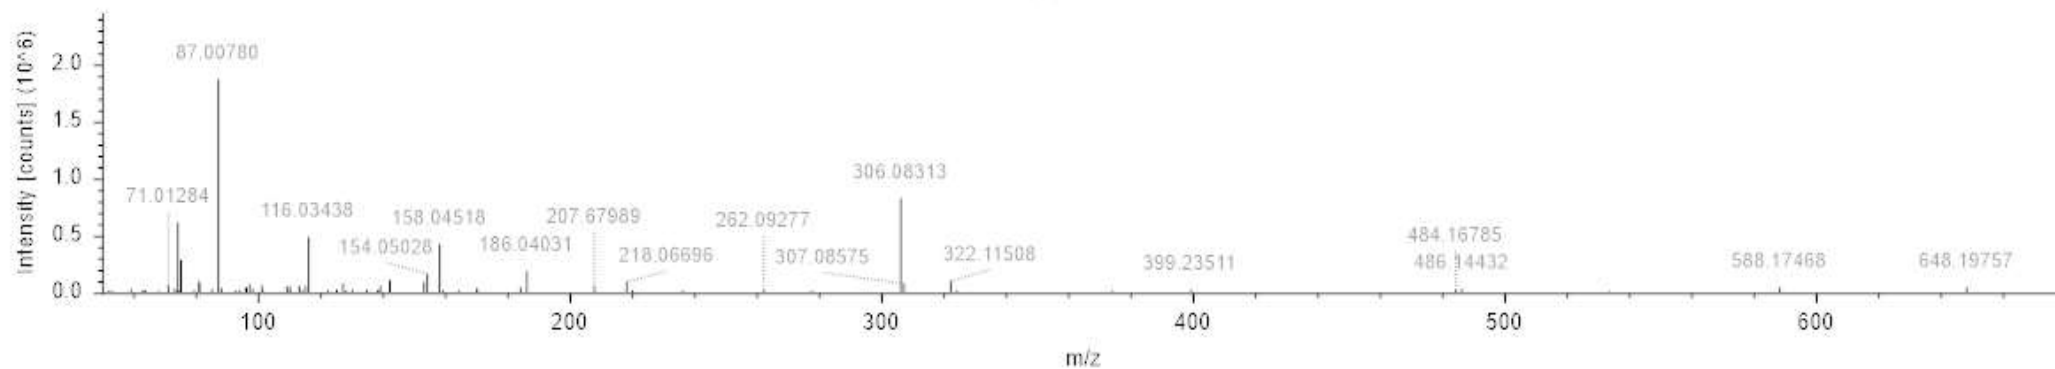





| Structure | Name | RT [min] | Formula | Calc. MW  | Areas         |
|-----------|------|----------|---------|-----------|---------------|
| n/a       |      | 37.78    | n/a     | 649.20736 | 2.59e8 5.73e8 |

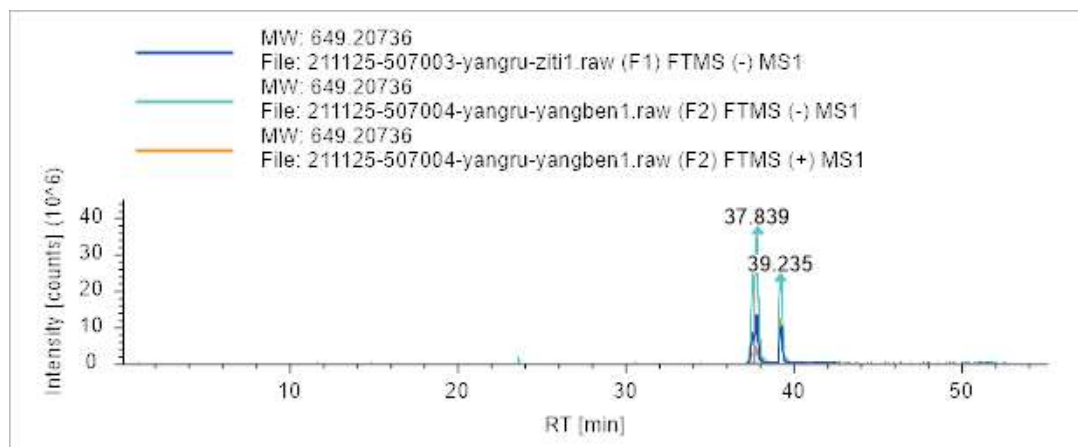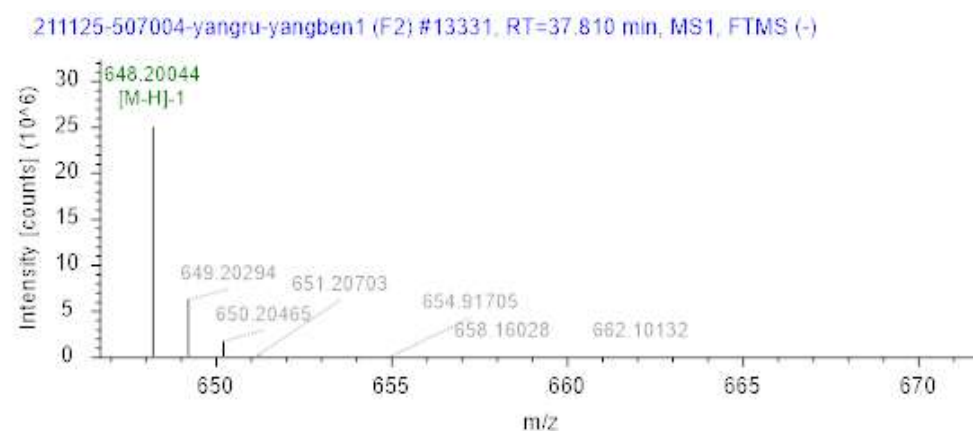

211125-507004-yangru-yangben1 (F2) #13388, RT=37.898 min, MS2, FTMS (-), (HCD, DDA, 648.2006@30, -1)

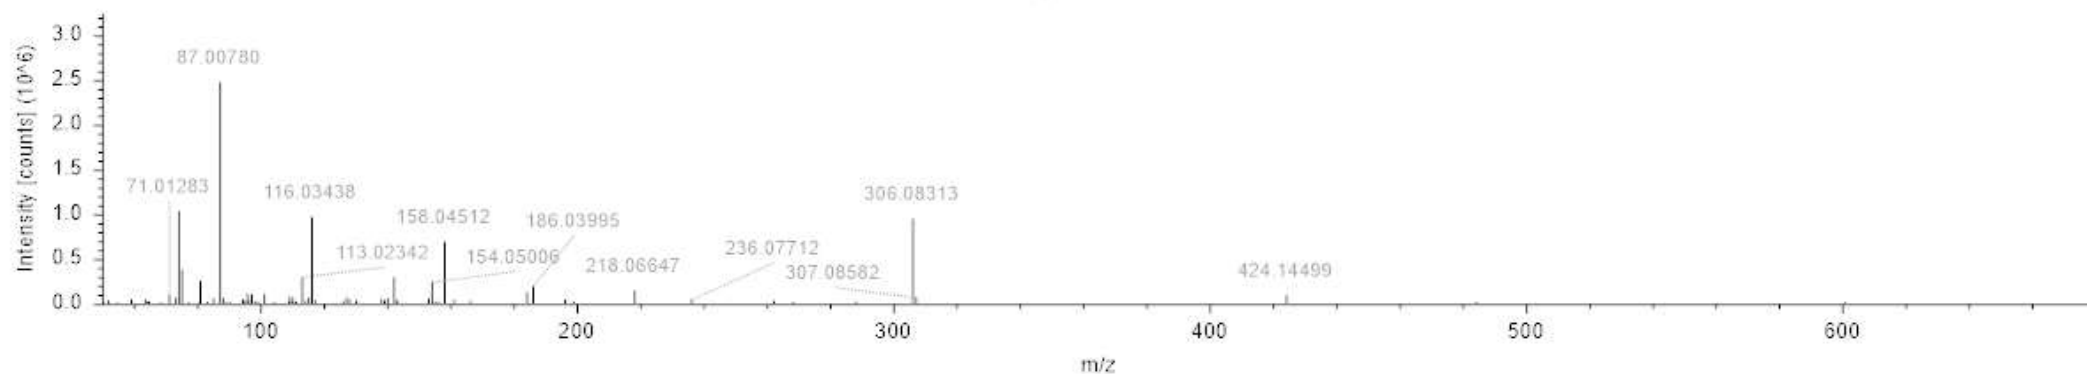



| Structure | Name | RT [min] | Formula | Calc. MW  | Areas  |        |        |        |
|-----------|------|----------|---------|-----------|--------|--------|--------|--------|
| n/a       |      | 33.12    | n/a     | 674.23771 | 1.25e7 | 1.89e8 | 1.21e7 | 1.26e8 |

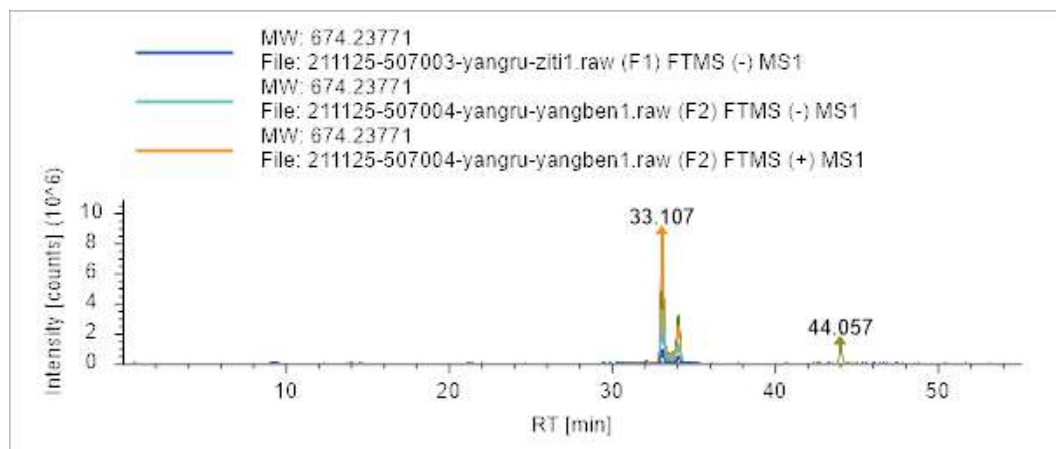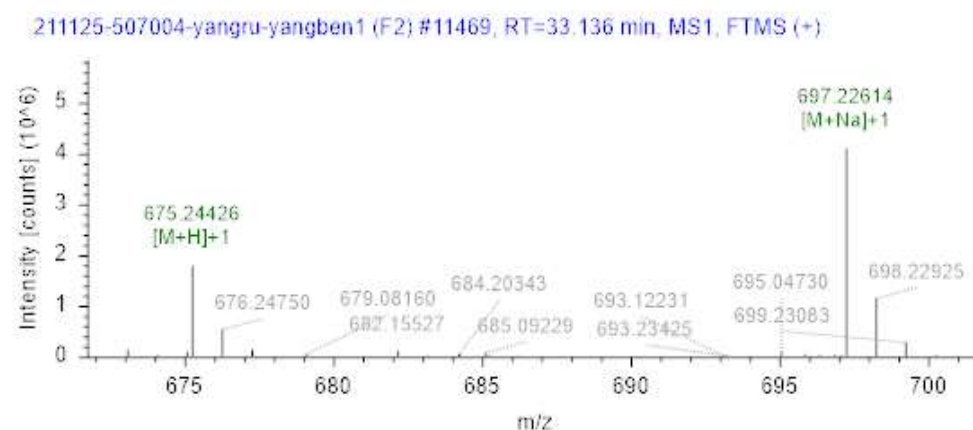

211125-507004-yangru-yangben1 (F2) #11476, RT=33.152 min, MS2, FTMS (-), (HCD, DDA, 673.2319@30, -1)

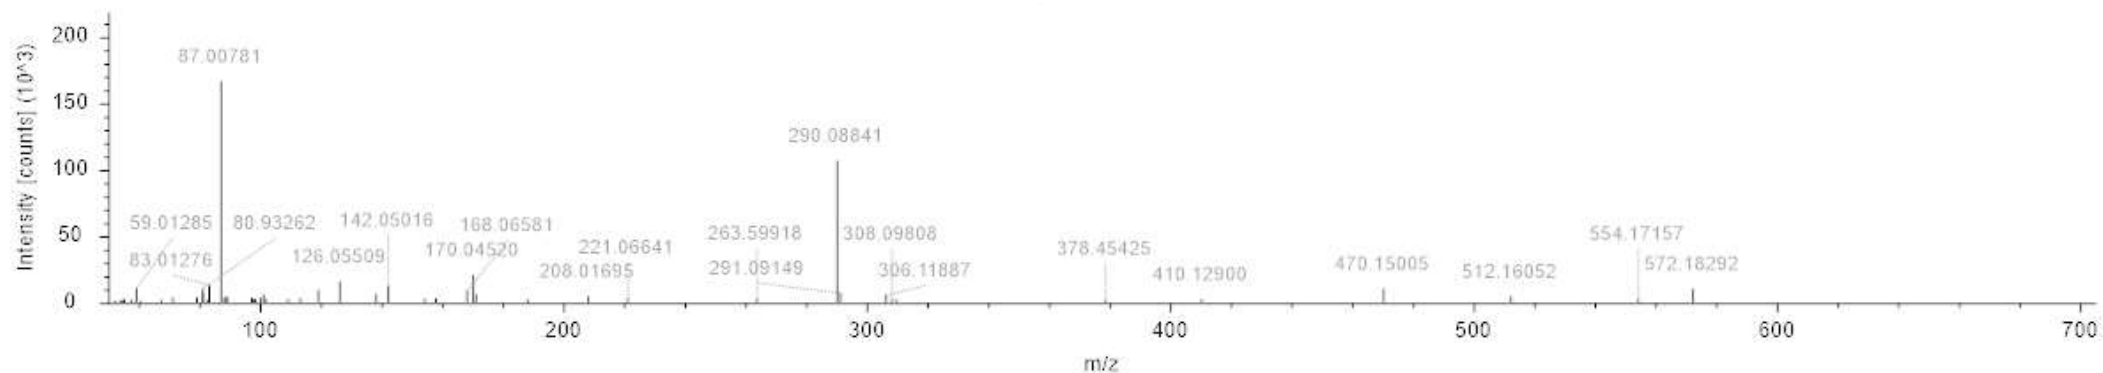



| Structure | Name | RT [min] | Formula | Calc. MW  | Areas         |
|-----------|------|----------|---------|-----------|---------------|
| n/a       |      | 34.11    | n/a     | 674.23795 | 5.58e7 3.28e7 |

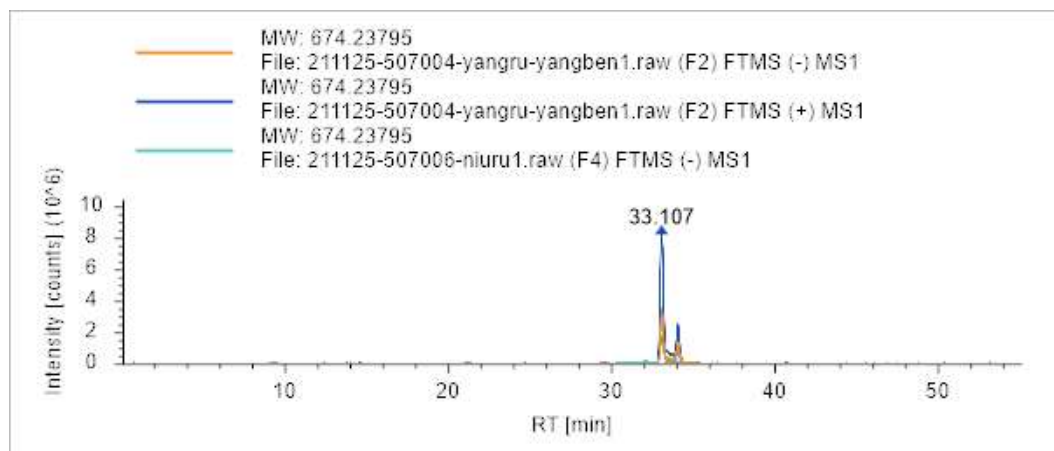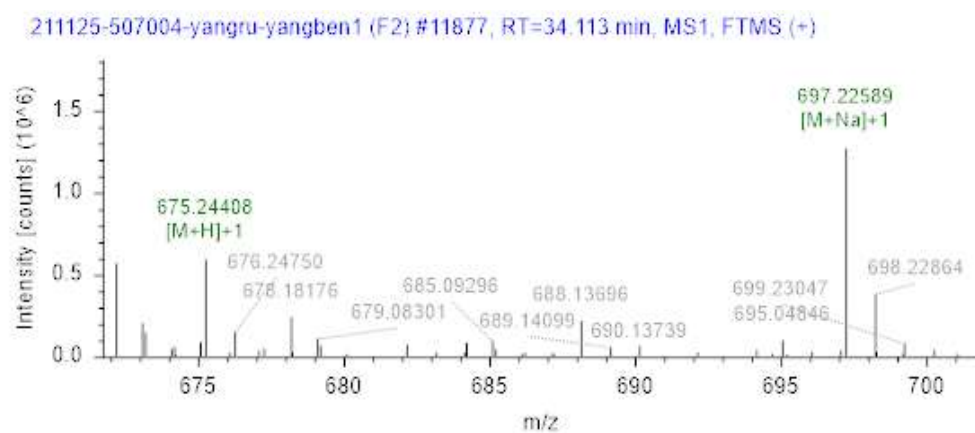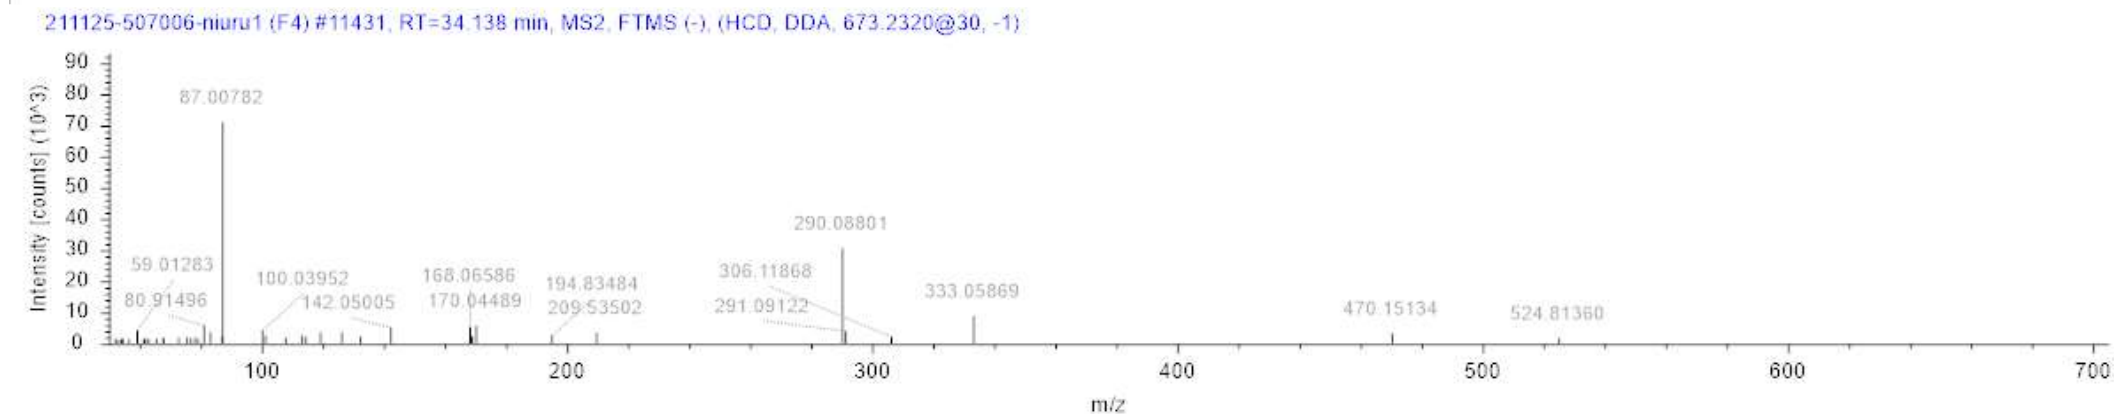



| Structure | Name | RT [min] | Formula | Calc. MW  | Areas  |        |  |  |  |  |  |
|-----------|------|----------|---------|-----------|--------|--------|--|--|--|--|--|
| n/a       |      | 36.42    | n/a     | 690.23344 | 2.69e7 | 1.18e8 |  |  |  |  |  |

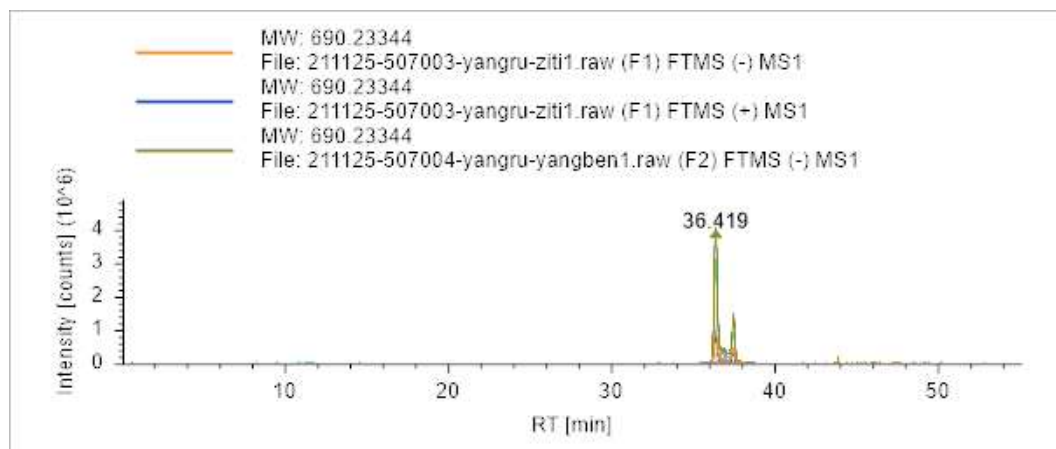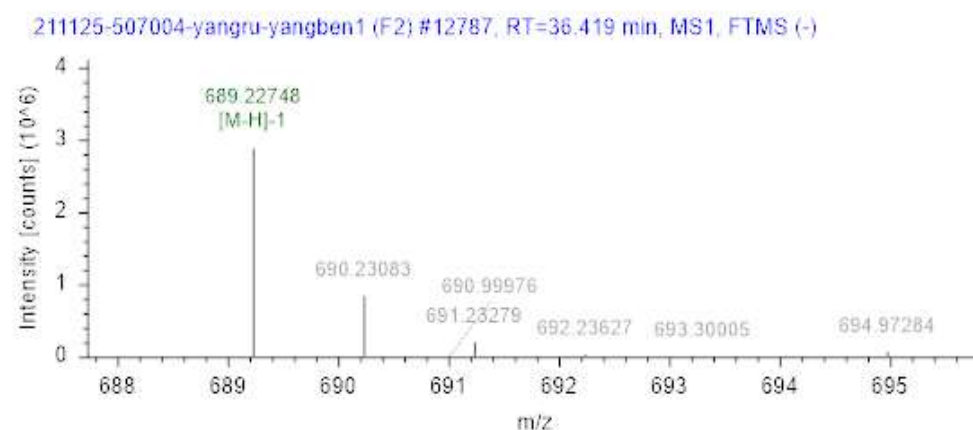

211125-507004-yangru-yangben1 (F2) #12788, RT=36.421 min, MS2, FTMS (-), (HCD, DDA, 689.2275@30, -1)

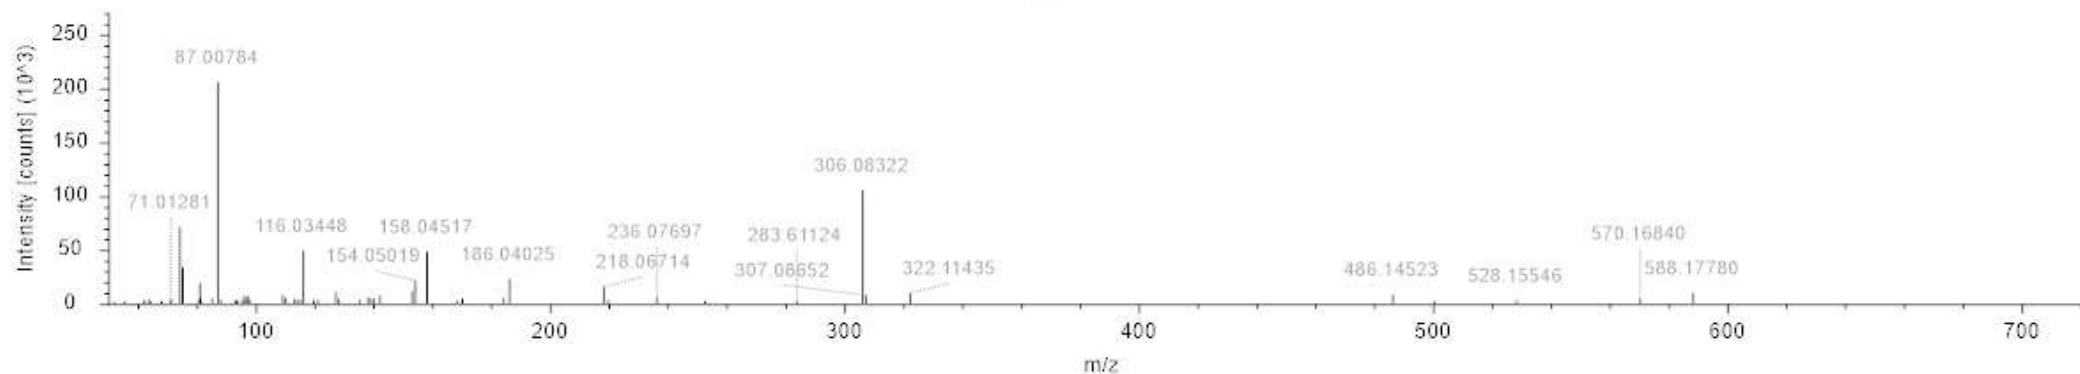



| Structure | Name | RT [min] | Formula | Calc. MW  | Areas  |
|-----------|------|----------|---------|-----------|--------|
| n/a       |      | 37.50    | n/a     | 690.23360 | 4.06e7 |

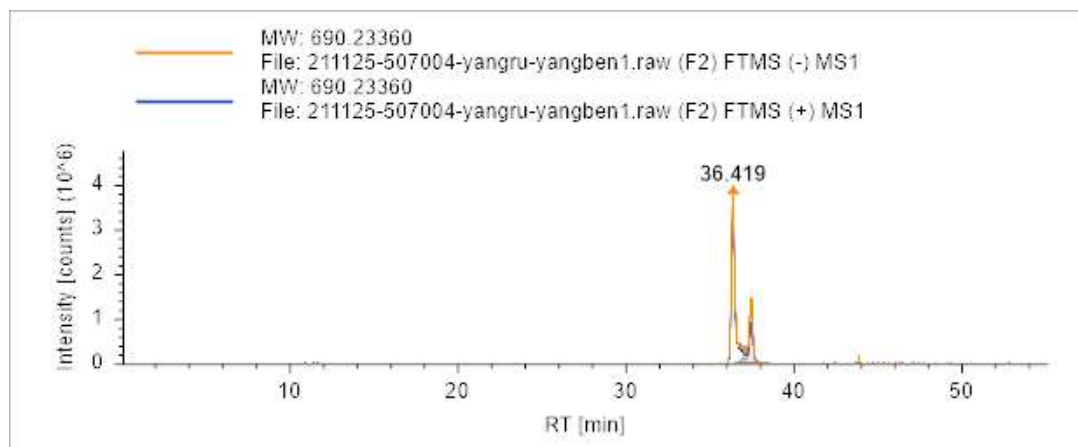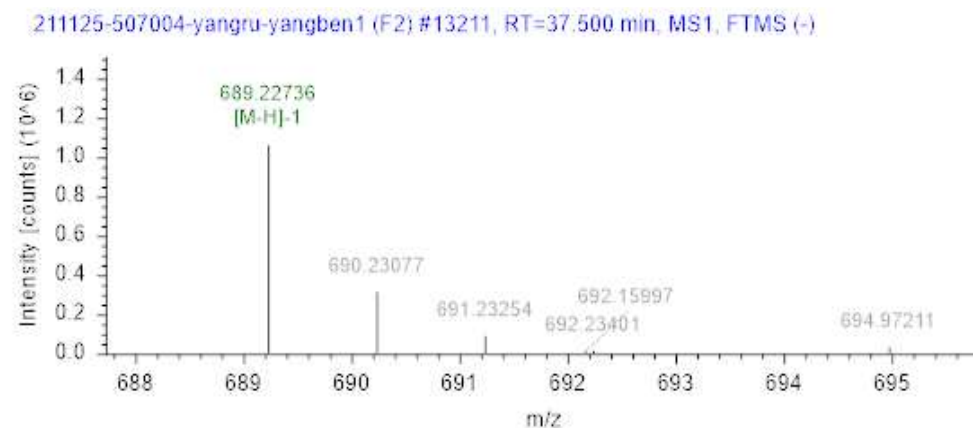

211125-507004-yangru-yangben1 (F2) #13188, RT=37.445 min, MS2, FTMS (-), (HCD, DDA, 689.2274@30, -1)

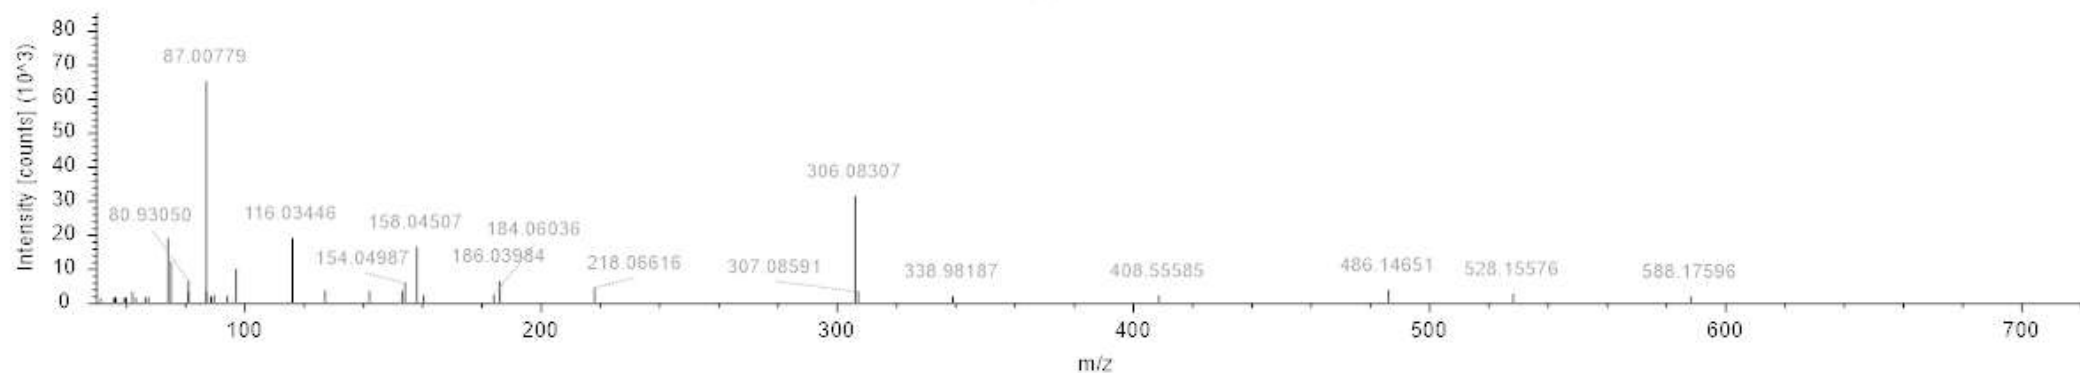



| Structure | Name | RT [min] | Formula | Calc. MW  | Areas  |
|-----------|------|----------|---------|-----------|--------|
| n/a       |      | 38.99    | n/a     | 779.27138 | 6.52e7 |

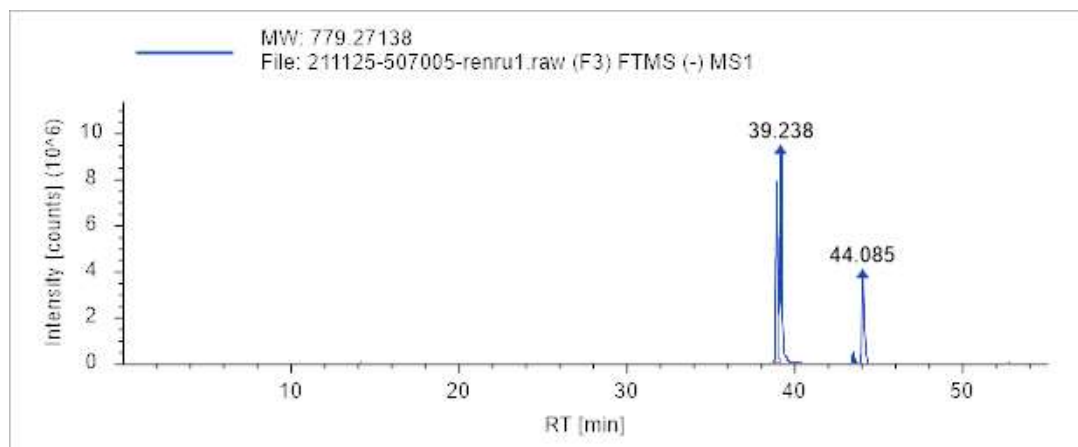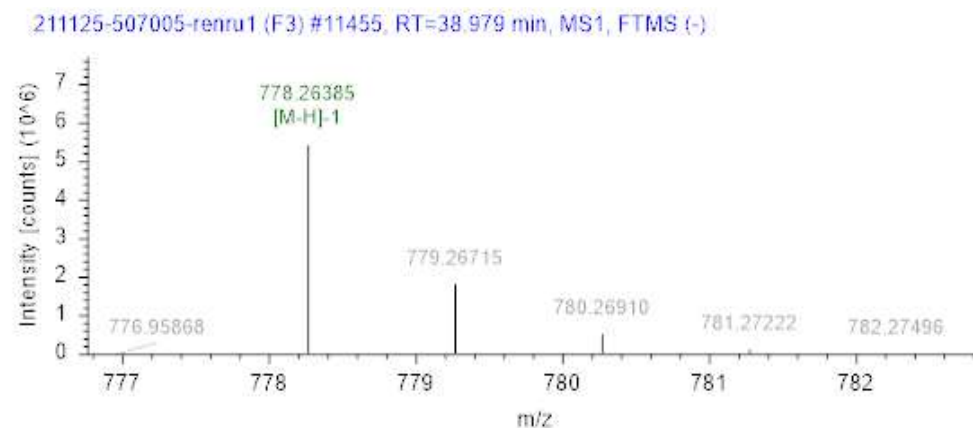

211125-507005-renru1 (F3) #11426, RT=38.899 min, MS2, FTMS (-), (HCD, DDA, 778.2632@30, -1)

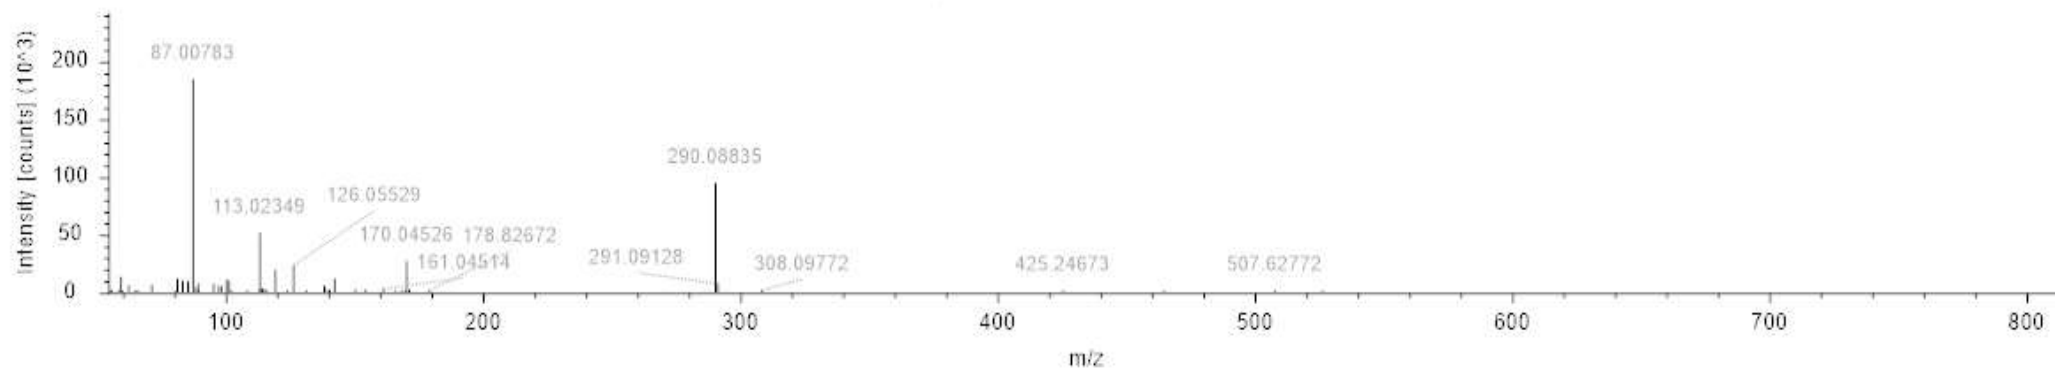



| Structure | Name | RT [min] | Formula | Calc. MW  | Areas  |        |  |
|-----------|------|----------|---------|-----------|--------|--------|--|
| n/a       |      | 39.80    | n/a     | 795.26640 | 1.68e7 | 4.02e7 |  |

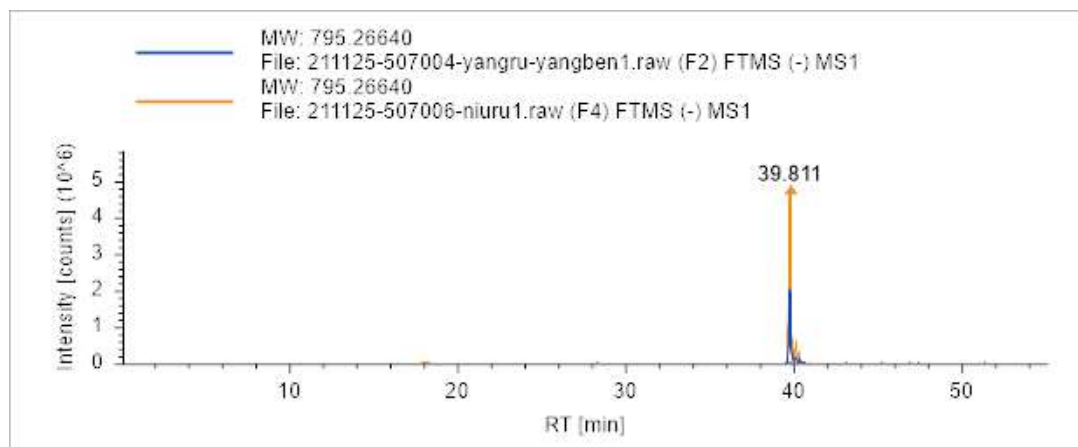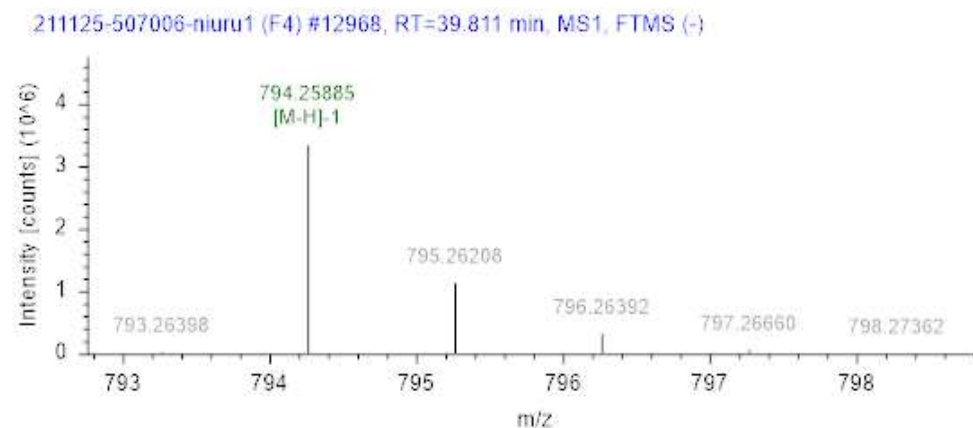

211125-507006-niuru1 (F4) #12993, RT=39.885 min, MS2, FTMS (-), (HCD, DDA, 794.2593@30, -1)

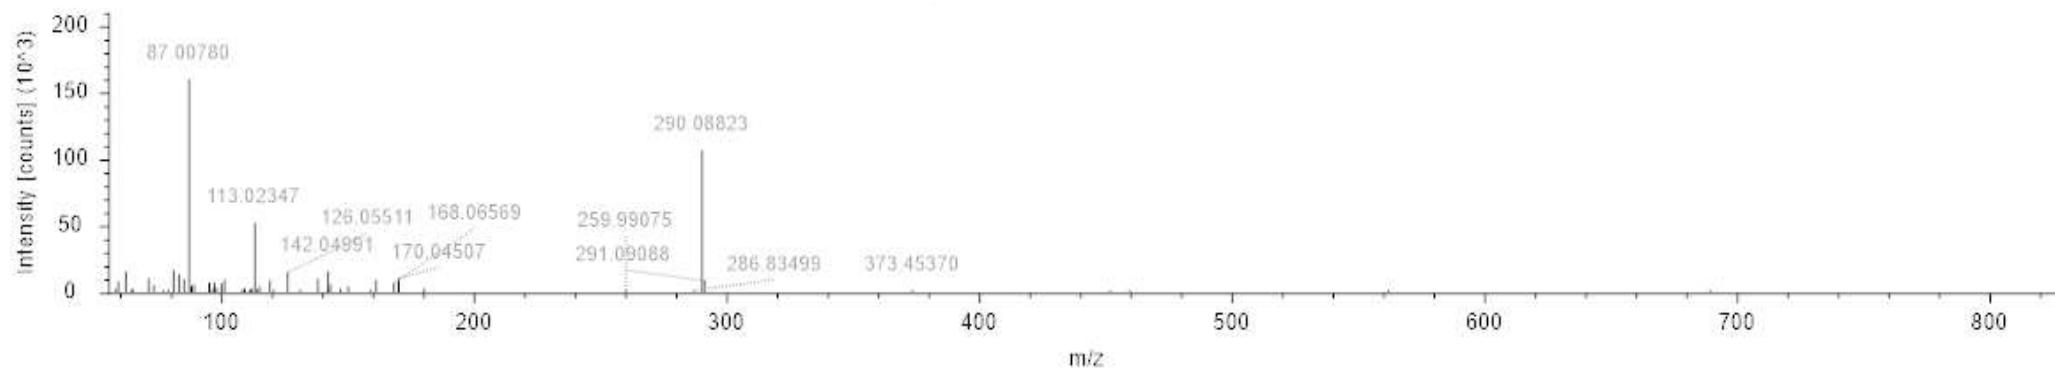



| Structure | Name | RT [min] | Formula | Calc. MW  | Areas  |        |  |  |  |  |  |
|-----------|------|----------|---------|-----------|--------|--------|--|--|--|--|--|
| n/a       |      | 40.76    | n/a     | 811.26171 | 6.41e6 | 1.85e7 |  |  |  |  |  |

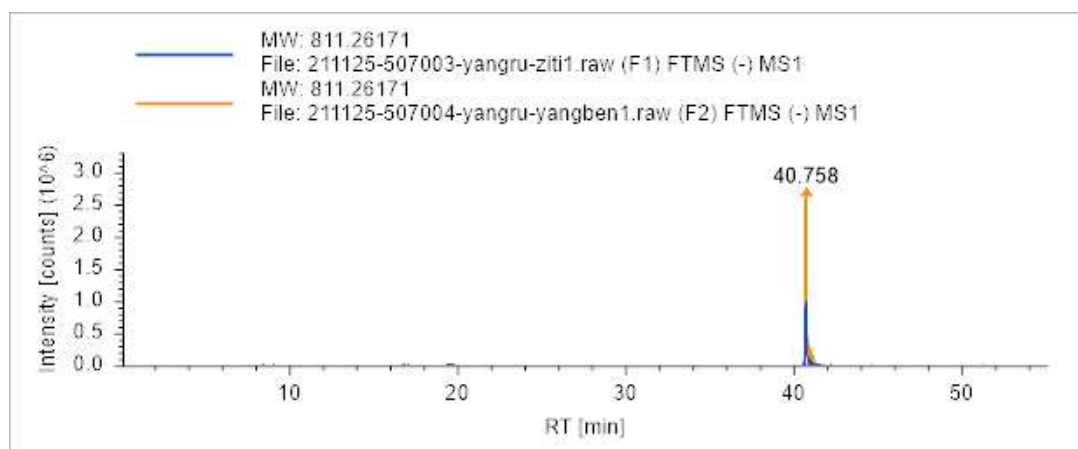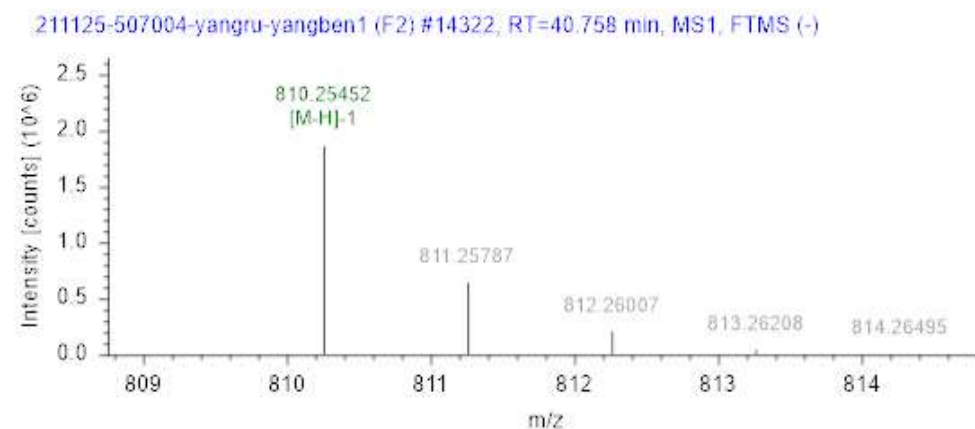

211125-507004-yangru-yangben1 (F2) #14305, RT=40.678 min, MS2, FTMS (-), (HCD, DDA, 810.2548@30, -1)

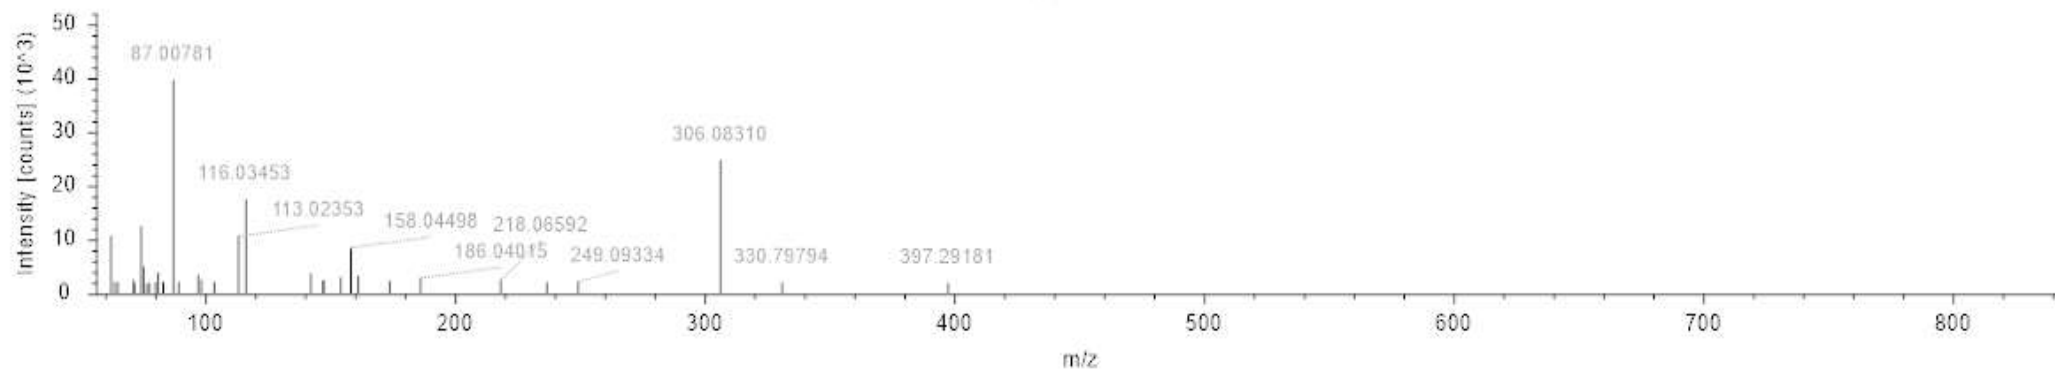





| Structure | Name | RT [min] | Formula | Calc. MW  | Areas  |        |        |  |  |
|-----------|------|----------|---------|-----------|--------|--------|--------|--|--|
| n/a       |      | 39.29    | n/a     | 924.30875 | 1.20e7 | 3.10e7 | 4.97e7 |  |  |

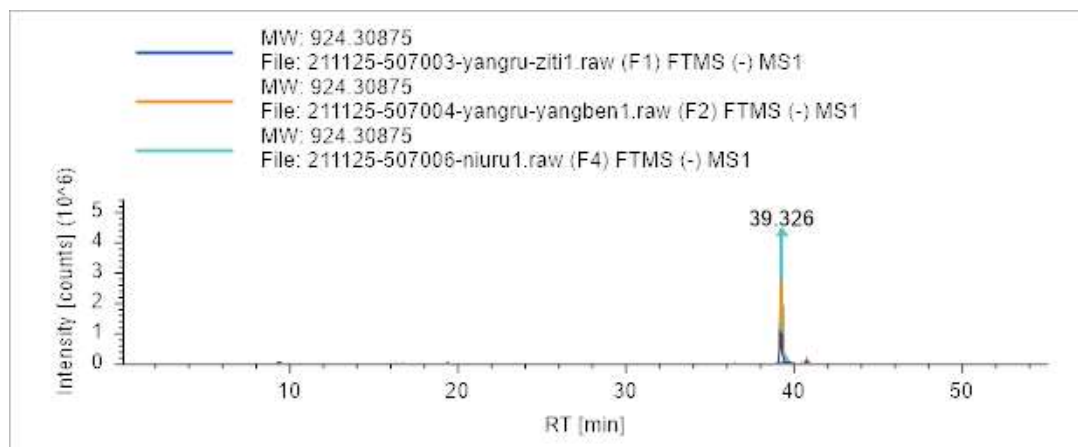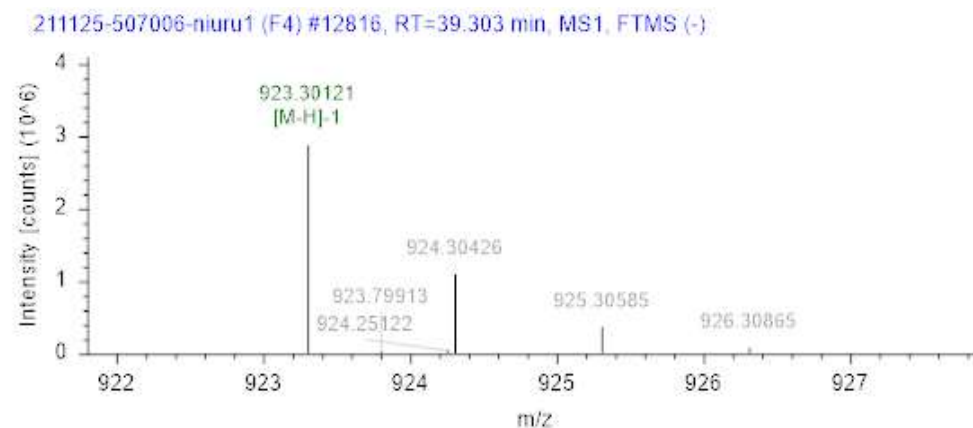

211125-507006-niuru1 (F4) #12847, RT=39.388 min, MS2, FTMS (-), (HCD, DDA, 923.3016@30, -1)

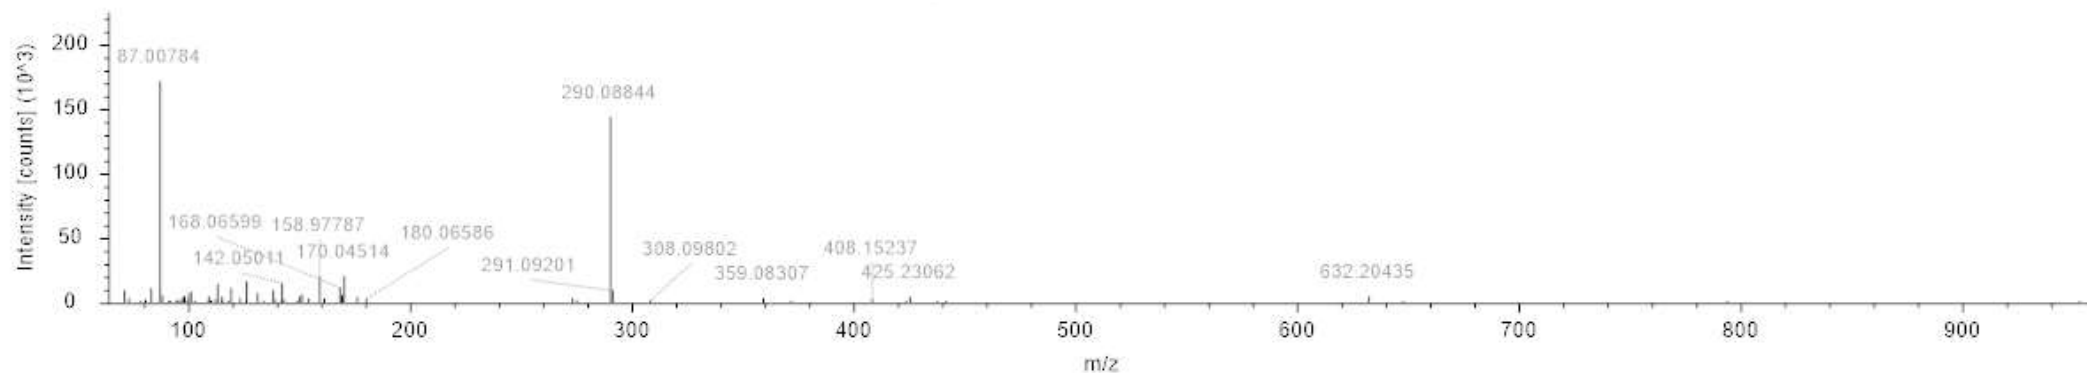



| Structure | Name | RT [min] | Formula | Calc. MW  | Areas         |
|-----------|------|----------|---------|-----------|---------------|
| n/a       |      | 40.34    | n/a     | 940.30444 | 8.78e6 2.57e7 |

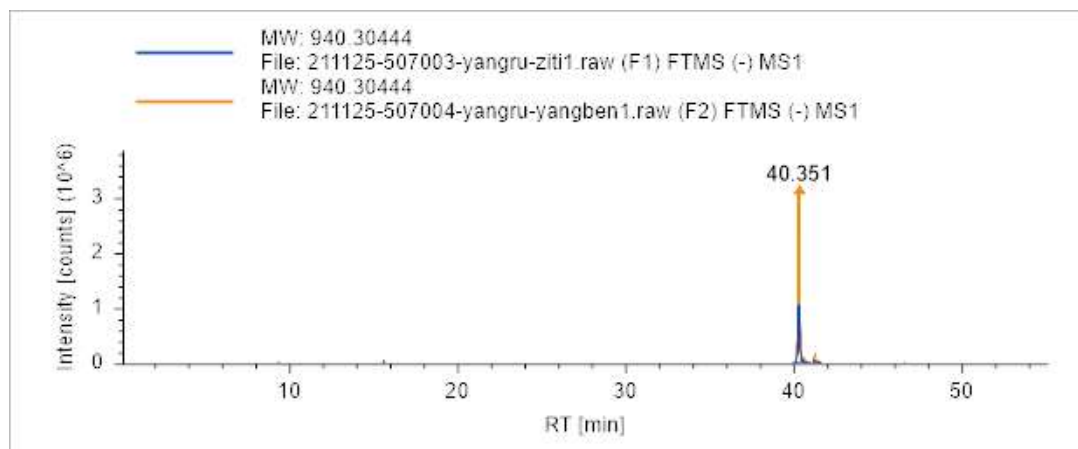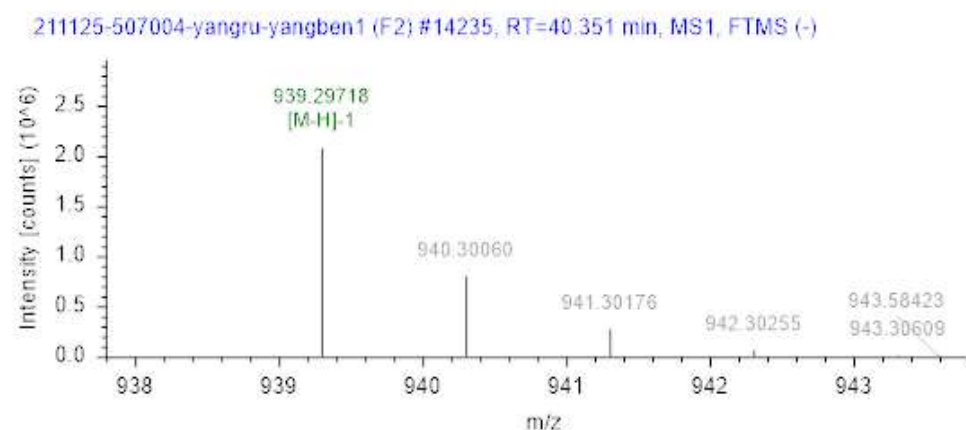

211125-507004-yangru-yangben1 (F2) #14248, RT=40.399 min, MS2, FTMS (-), (HCD, DDA, 939.2975@30, -1)

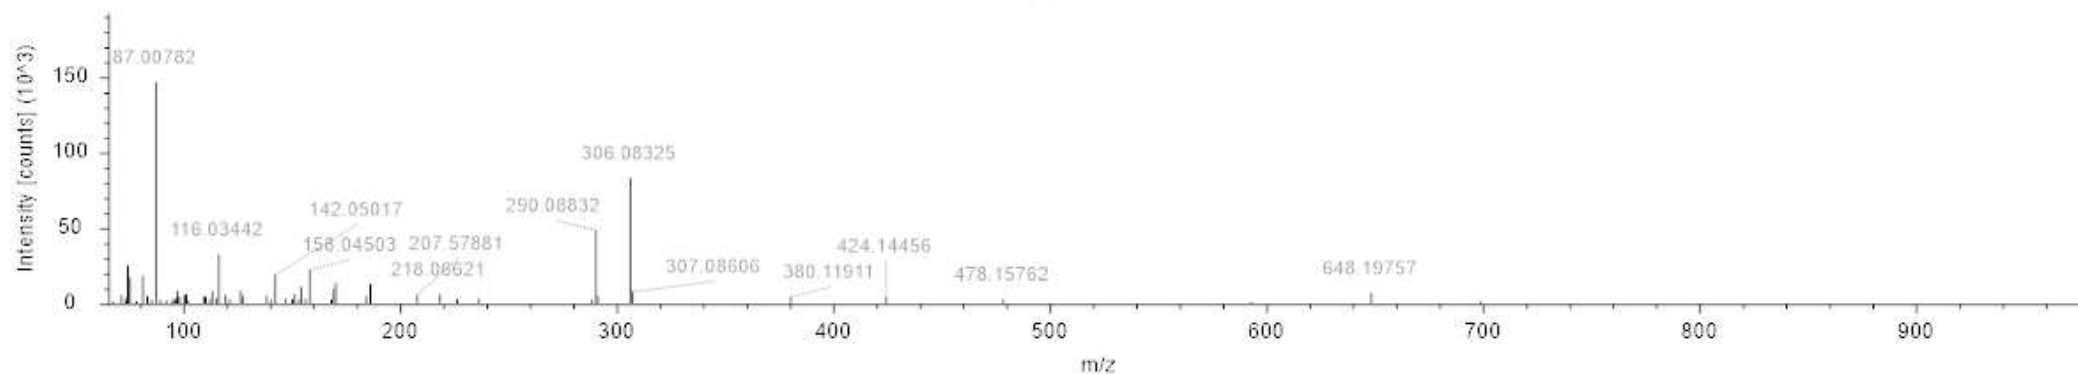



| Structure | Name | RT [min] | Formula | Calc. MW  | Areas  |        |  |  |  |  |  |
|-----------|------|----------|---------|-----------|--------|--------|--|--|--|--|--|
| n/a       |      | 41.14    | n/a     | 956.29852 | 9.29e6 | 3.29e7 |  |  |  |  |  |

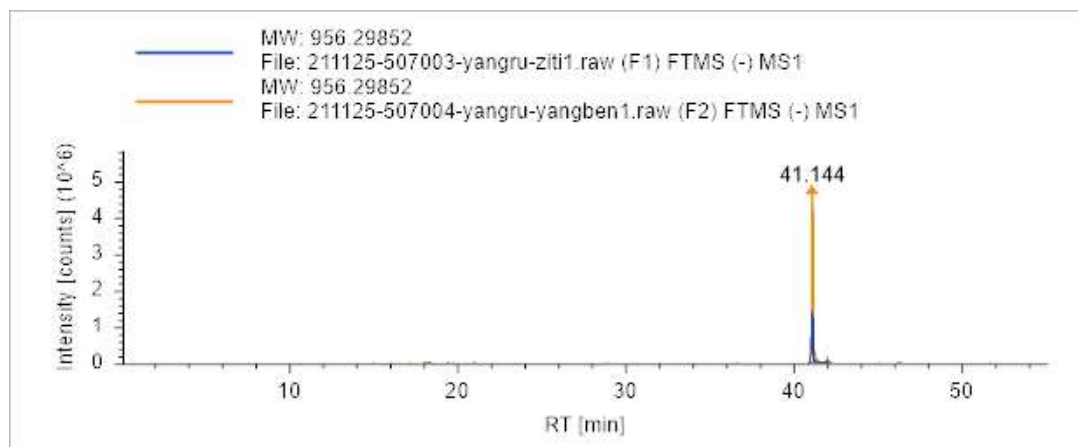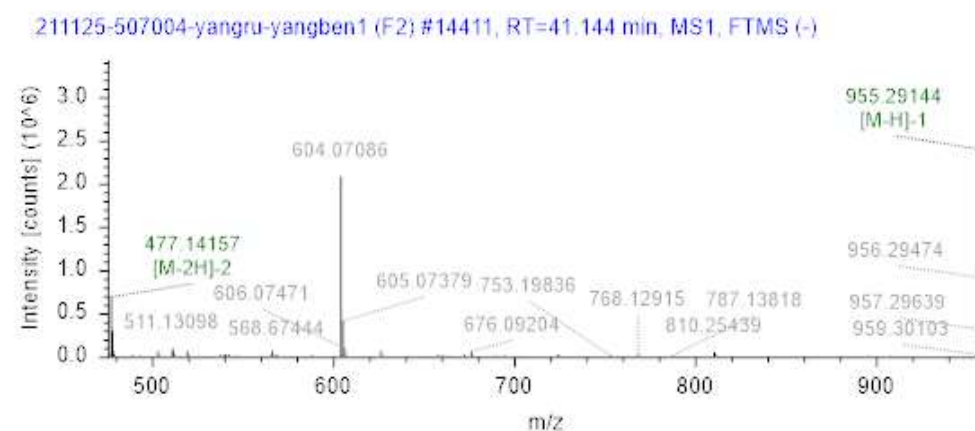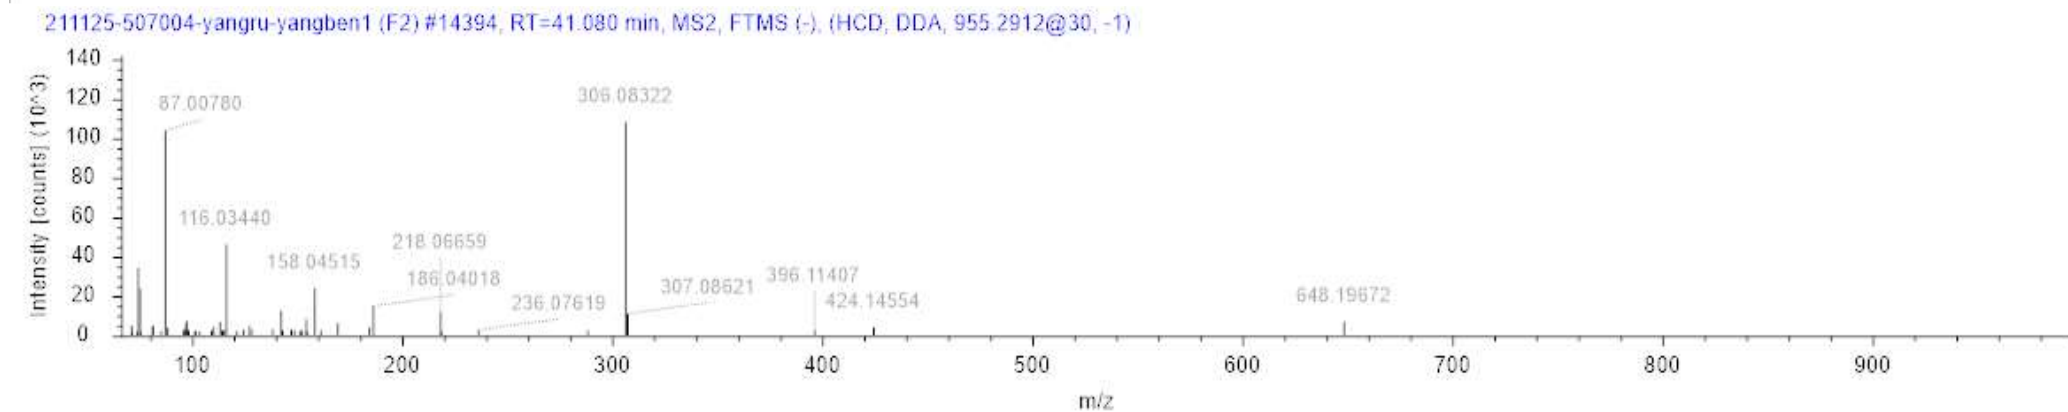



| Structure | Name | RT [min] | Formula | Calc. MW  | Areas  |
|-----------|------|----------|---------|-----------|--------|
| n/a       |      | 44.20    | n/a     | 998.34130 | 9.33e6 |

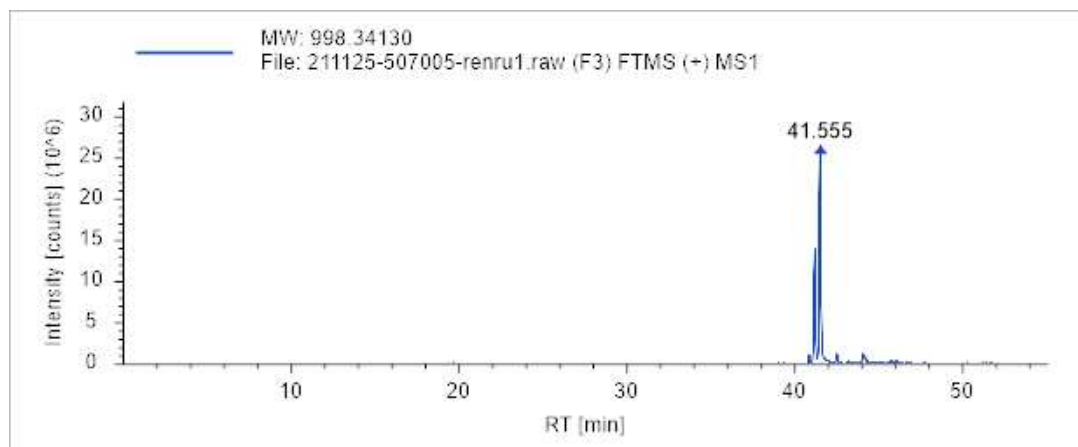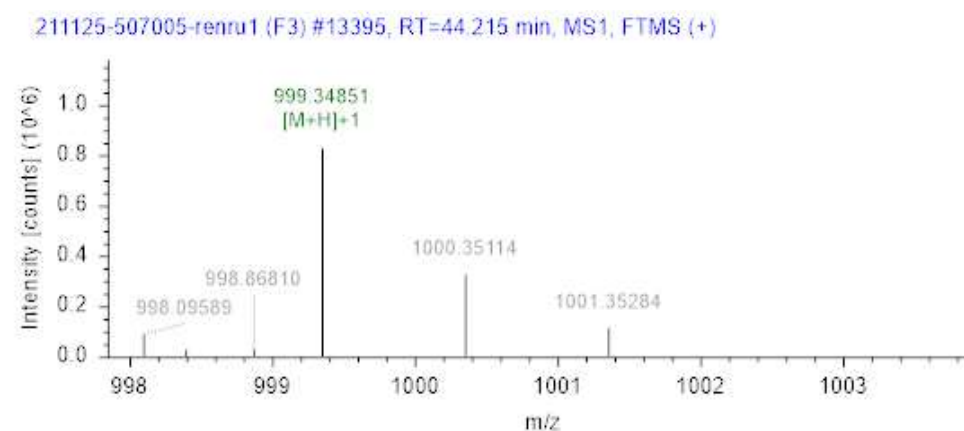

211125-507005-renru1 (F3) #13408, RT=44.246 min, MS2, FTMS (+), (HCD, DDA, 999.3485@30, +1)

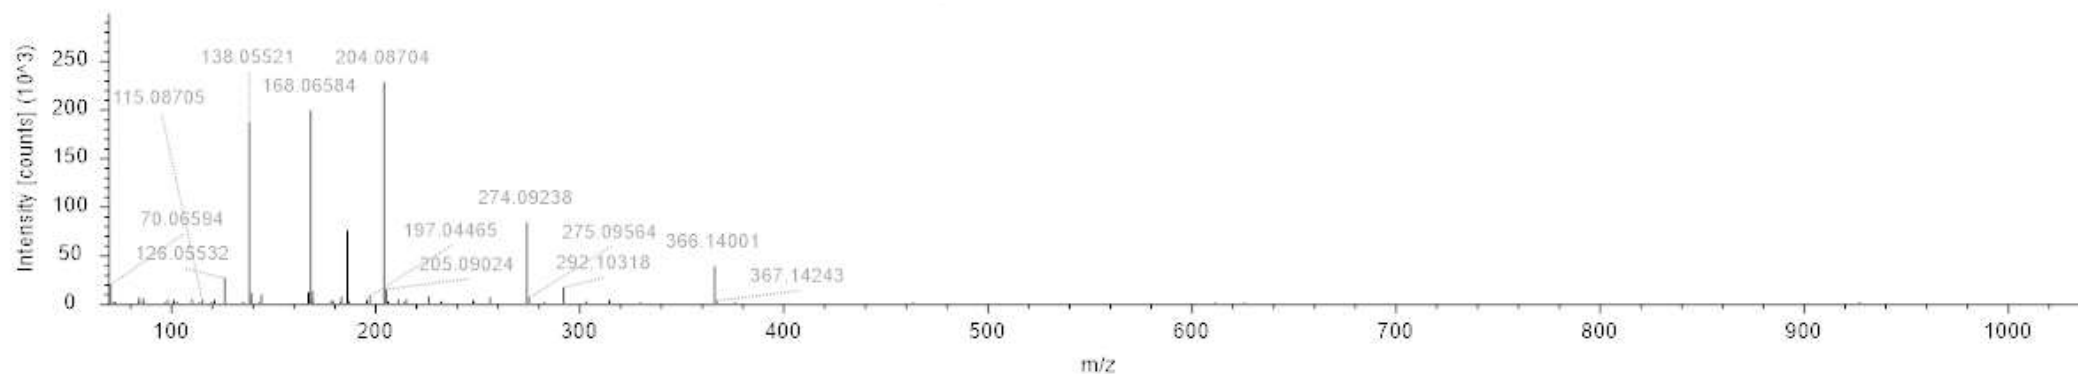



| Structure | Name | RT [min] | Formula | Calc. MW  | Areas  |
|-----------|------|----------|---------|-----------|--------|
| n/a       |      | 41.23    | n/a     | 998.34363 | 5.24e8 |

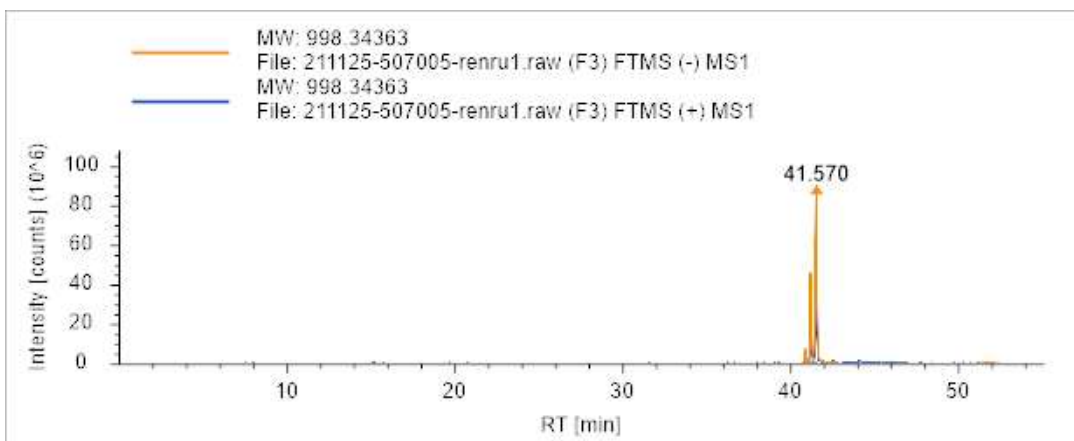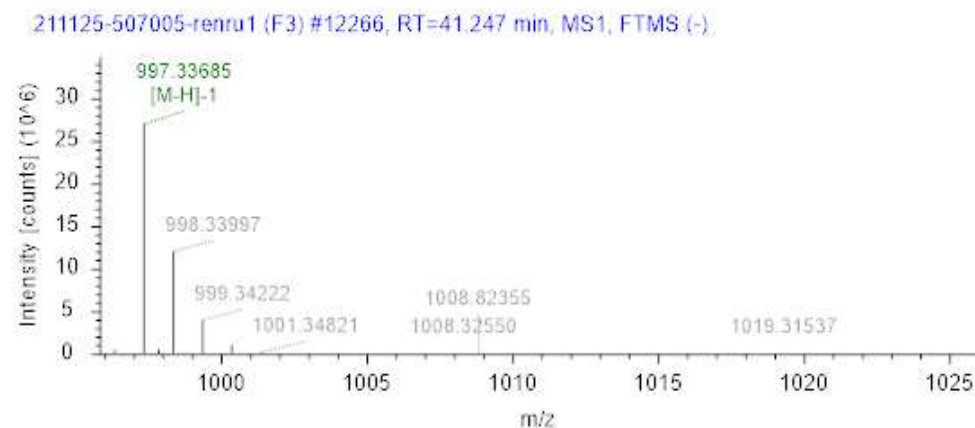

211125-507005-renru1 (F3) #12256, RT=41.222 min, MS2, FTMS (-), (HCD, DDA, 997.8377@30, -1)

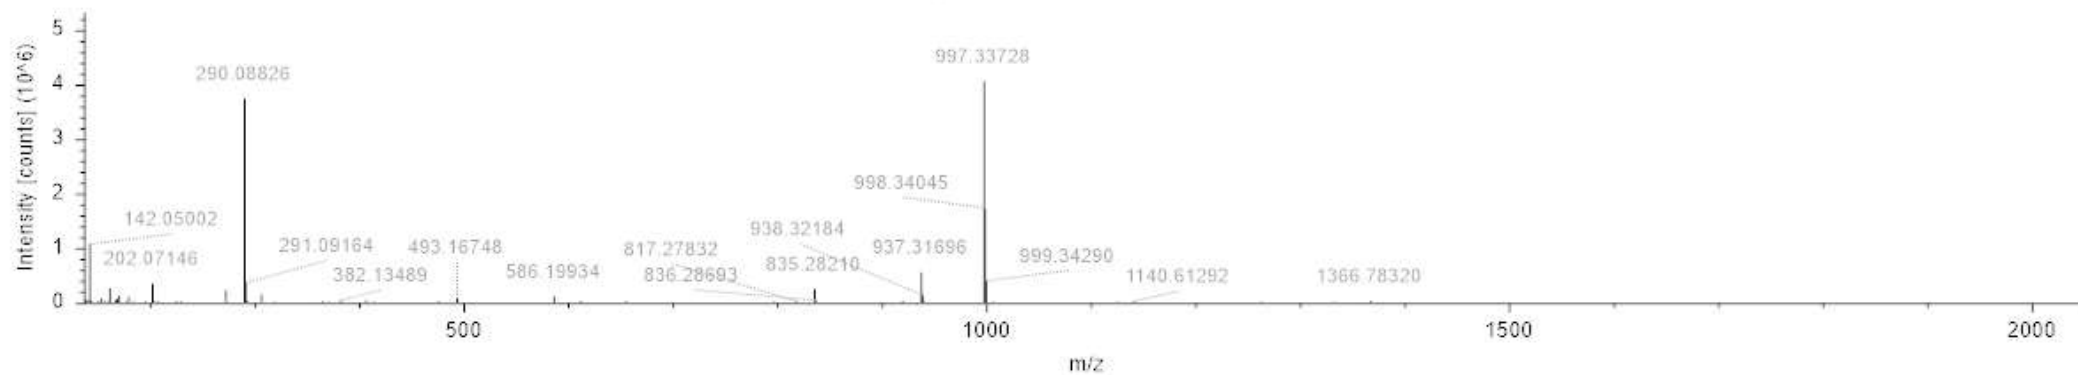



| Structure | Name | RT [min] | Formula | Calc. MW   | Areas  |
|-----------|------|----------|---------|------------|--------|
| n/a       |      | 41.97    | n/a     | 1086.36090 | 9.03e7 |

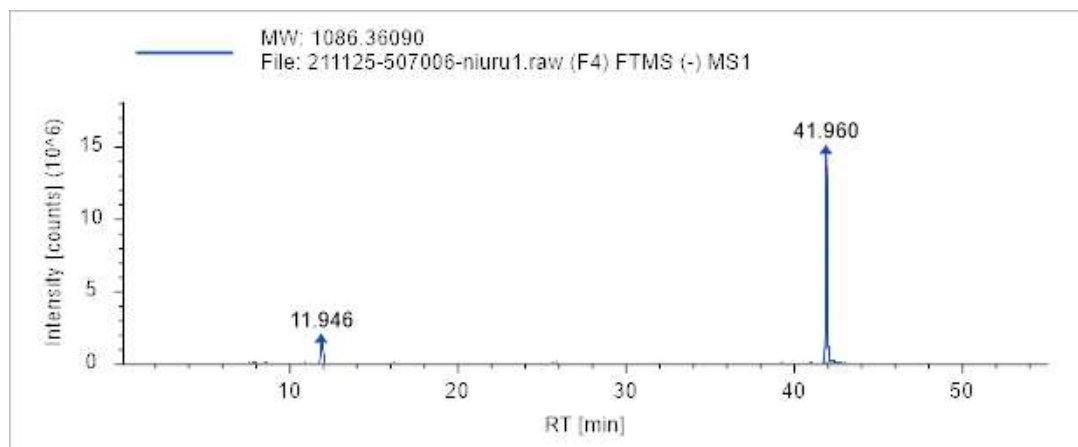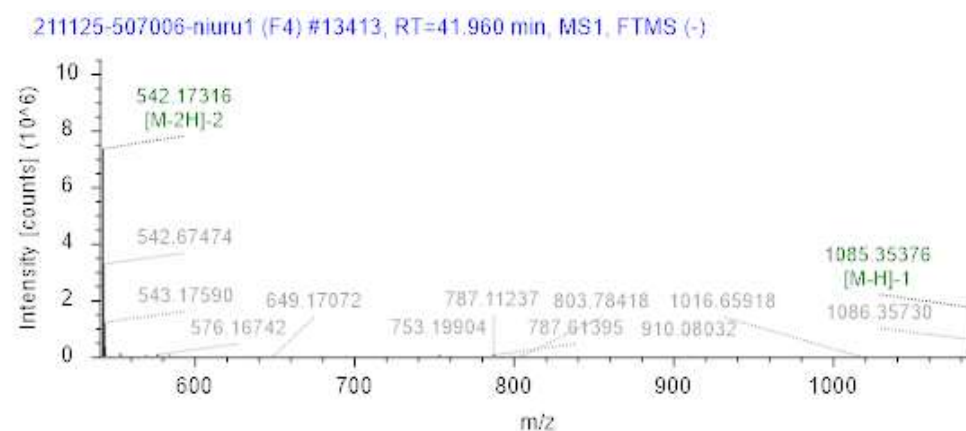

211125-507006-niuru1 (F4) #13399, RT=41.902 min, MS2, FTMS (-), (HCD, DDA, 1085.3539@30, -1)

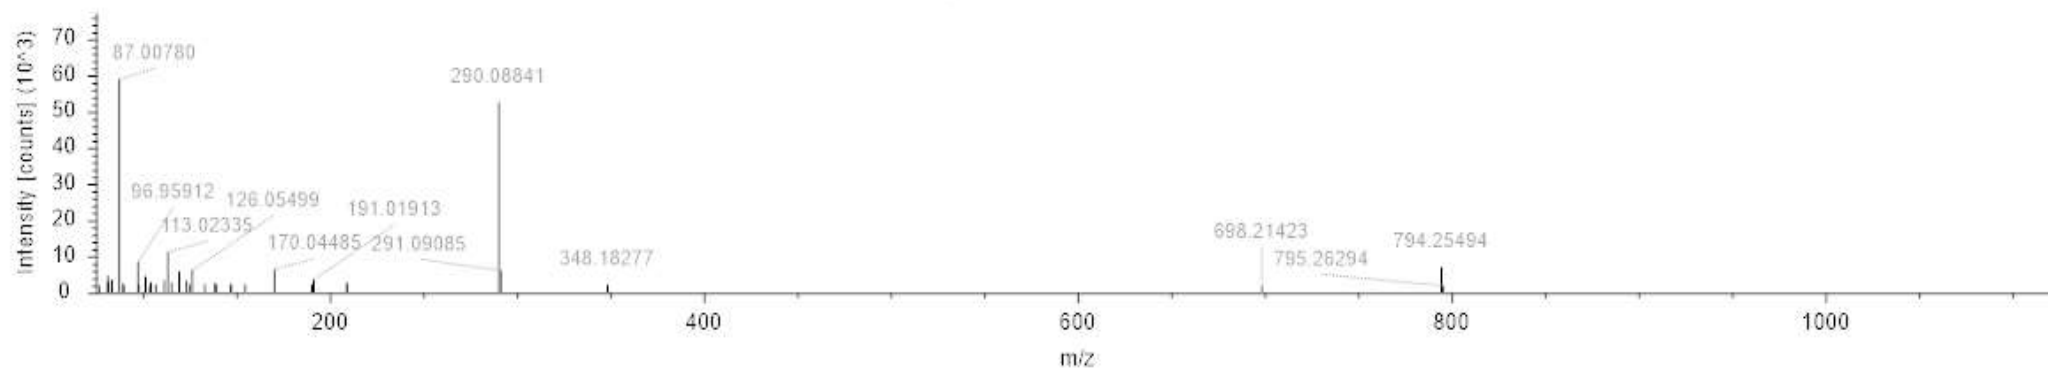



| Structure | Name | RT [min] | Formula | Calc. MW   | Areas  |
|-----------|------|----------|---------|------------|--------|
| n/a       |      | 42.50    | n/a     | 1144.40192 | 2.91e8 |

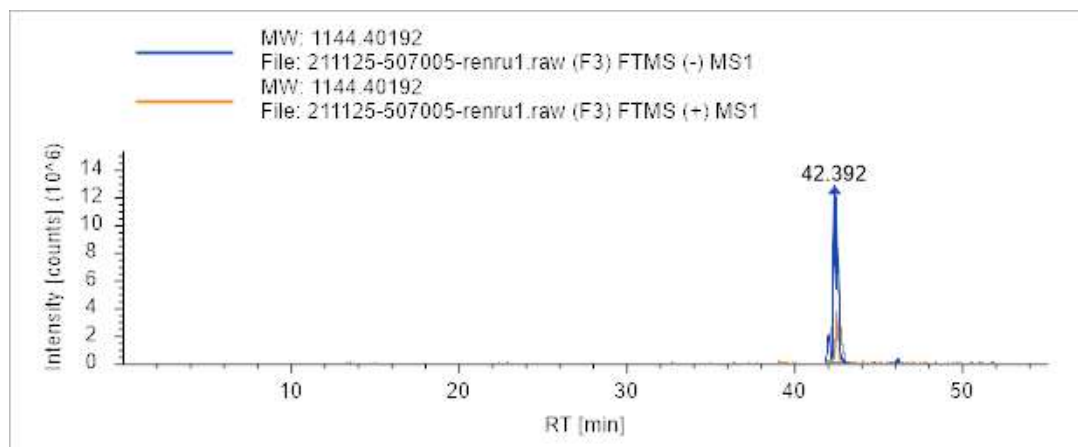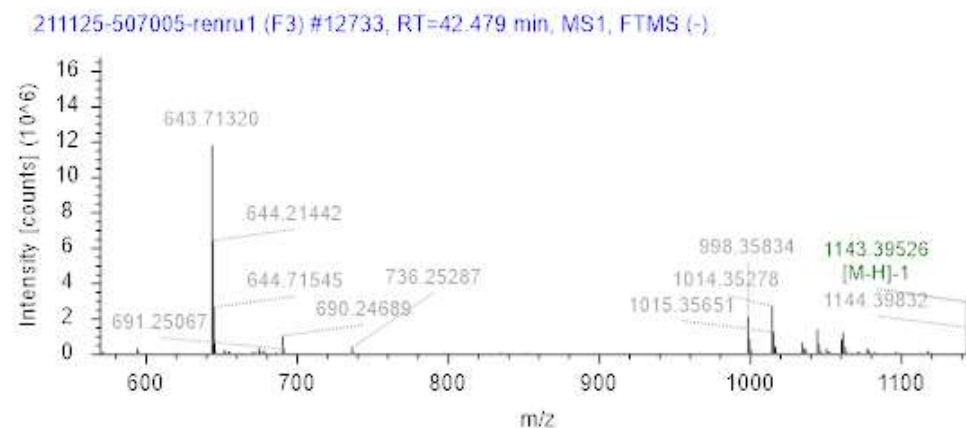

211125-507005-renru1 (F3) #12710, RT=42.423 min, MS2, FTMS (-), (HCD, DDA, 1143.3953@30, -1)

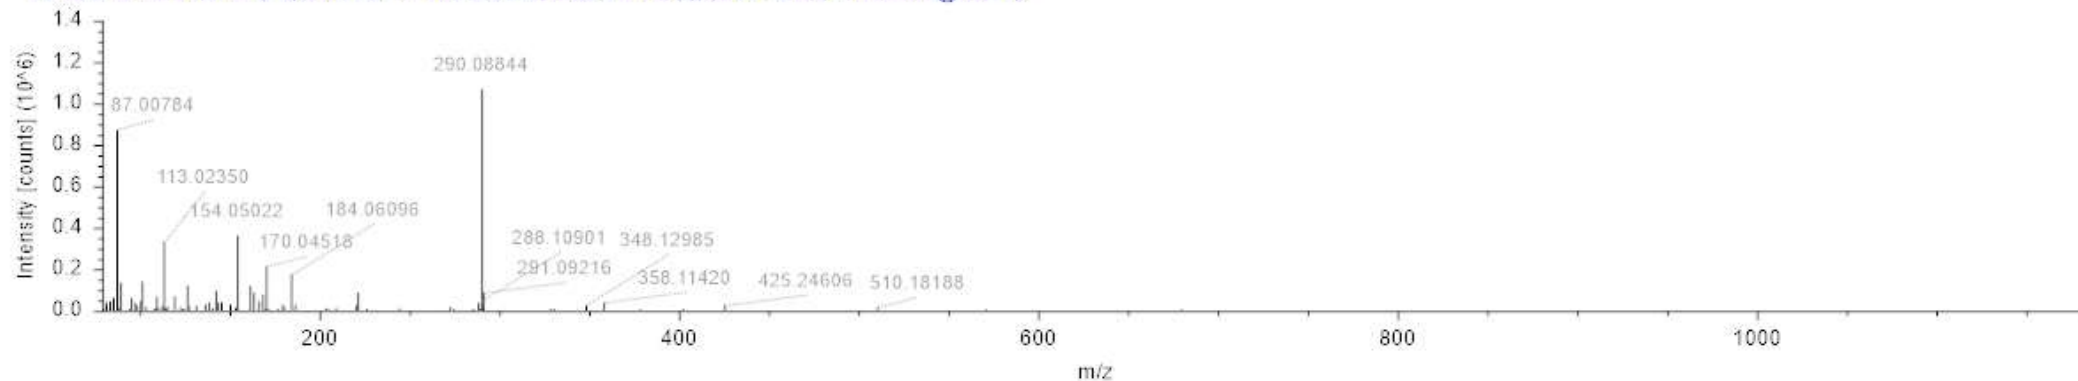



| Structure | Name | RT [min] | Formula | Calc. MW   | Areas  |
|-----------|------|----------|---------|------------|--------|
| n/a       |      | 42.86    | n/a     | 1160.39668 | 5.43e6 |

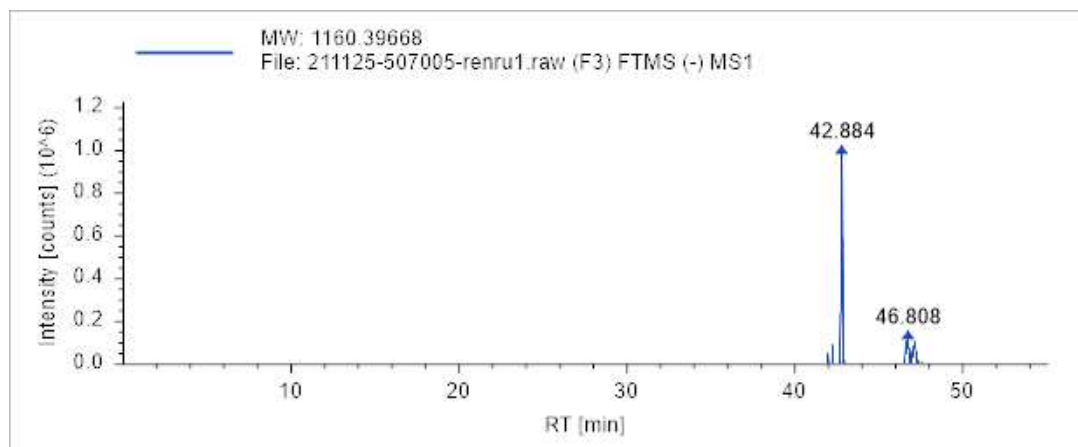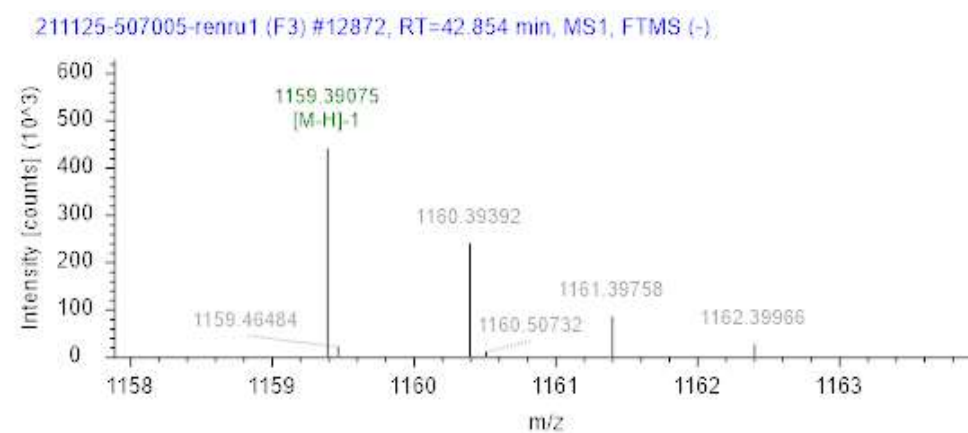

211125-507005-renru1 (F3) #12899, RT=42.918 min, MS2, FTMS (-), (HCD, DDA, 1157.4119@30, -1)

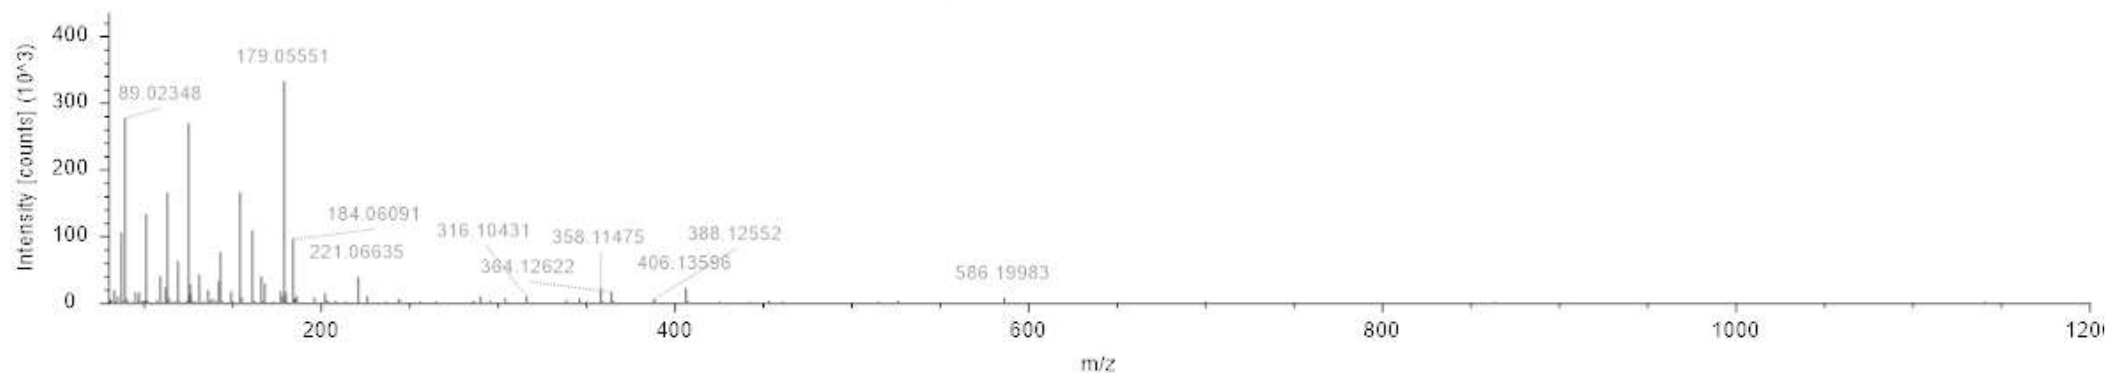





| Structure | Name | RT [min] | Formula | Calc. MW   | Areas  |
|-----------|------|----------|---------|------------|--------|
| n/a       |      | 42.56    | n/a     | 1289.43515 | 2.29e7 |

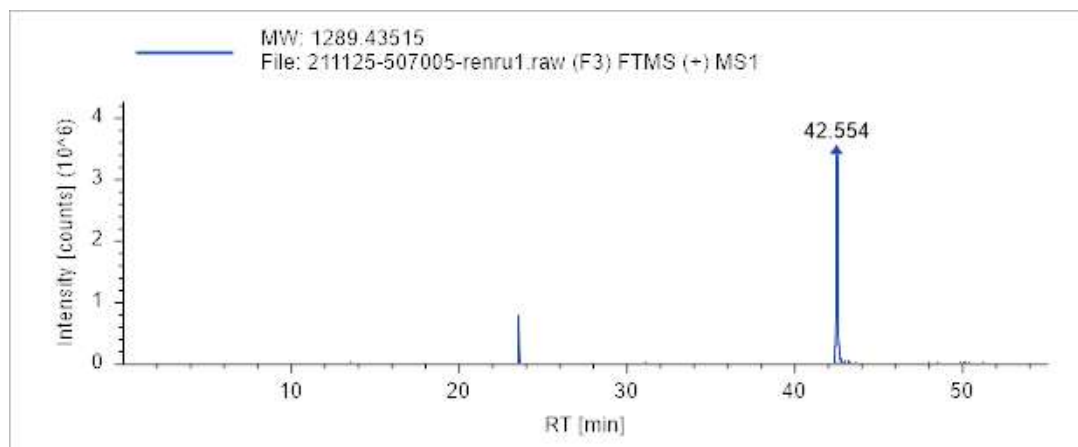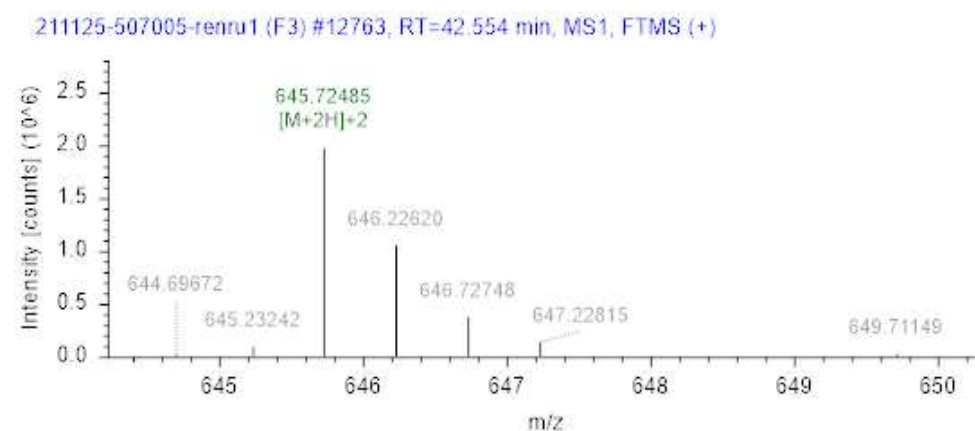

211125-507005-renru1 (F3) #12744, RT=42.503 min, MS2, FTMS (+), (HCD, DDA, 645.7255@30, +2)

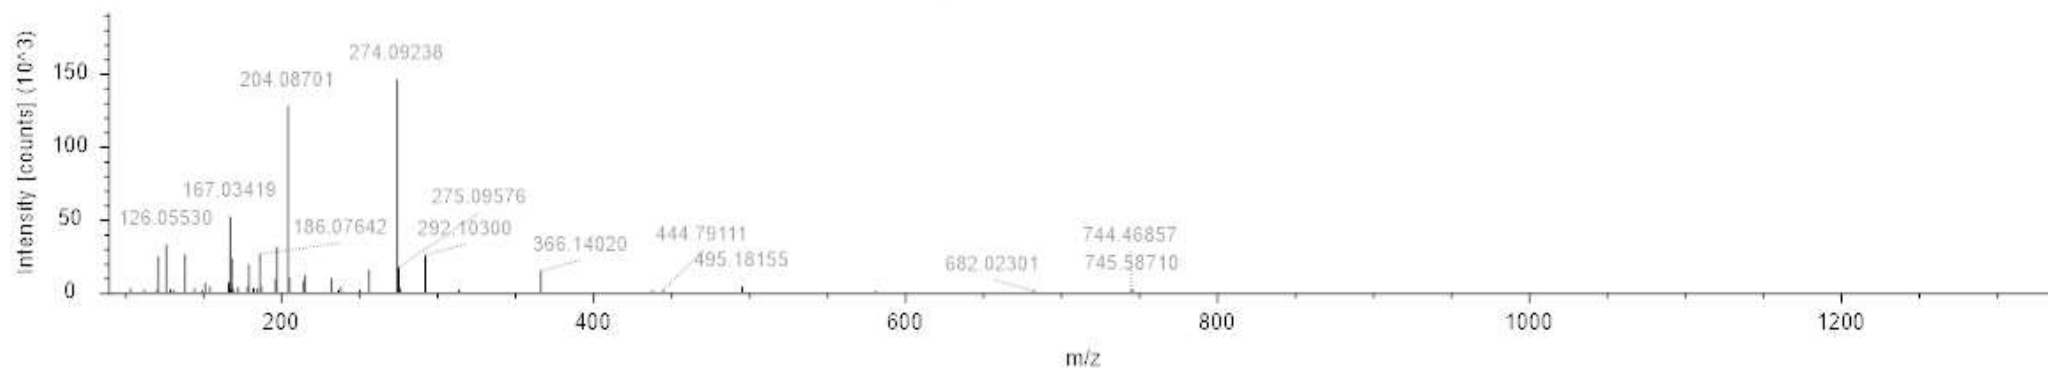



| Structure | Name | RT [min] | Formula | Calc. MW   | Areas  |
|-----------|------|----------|---------|------------|--------|
| n/a       |      | 43.30    | n/a     | 1363.47521 | 2.48e8 |

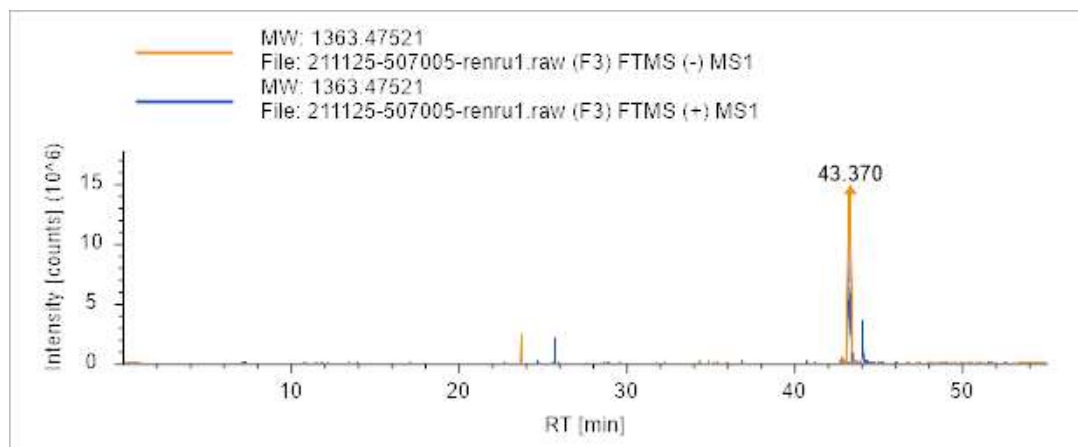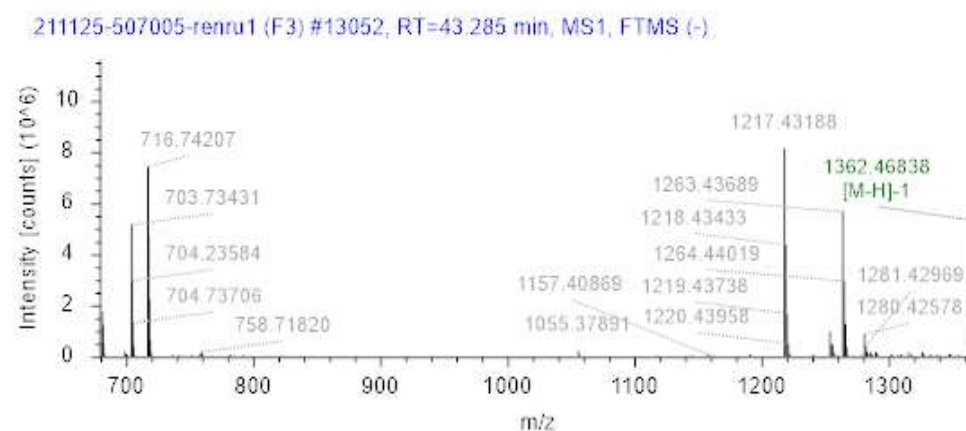

211125-507005-renru1 (F3) #13088, RT=43.374 min, MS2, FTMS (-), (HCD, DDA, 1362.4690@30, -1).

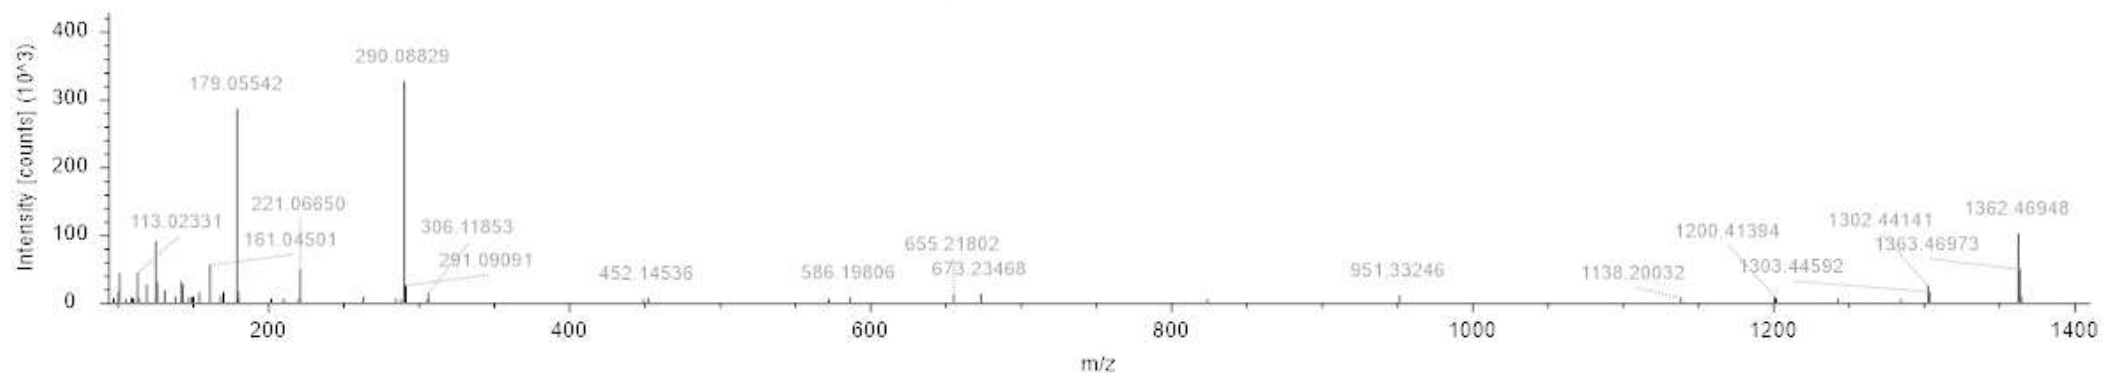



| Structure | Name | RT [min] | Formula | Calc. MW   | Areas  |
|-----------|------|----------|---------|------------|--------|
| n/a       |      | 43.28    | n/a     | 1435.49868 | 1.19e8 |

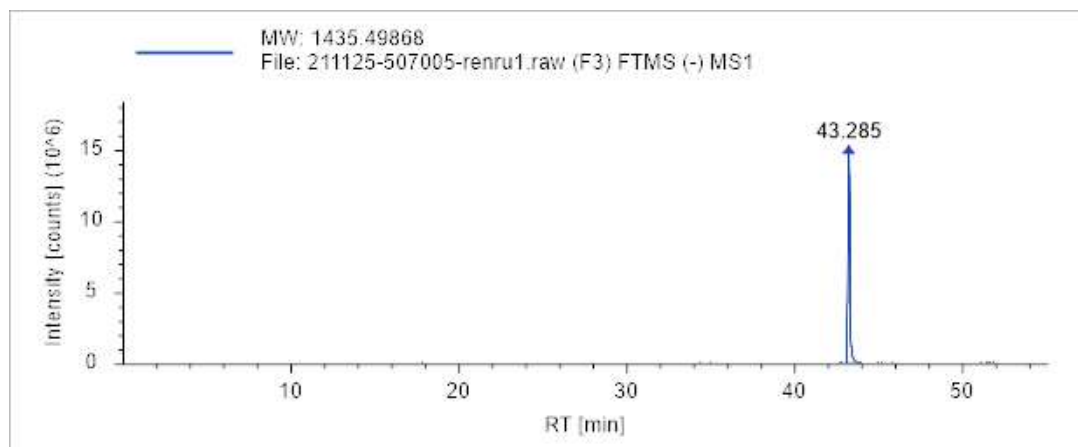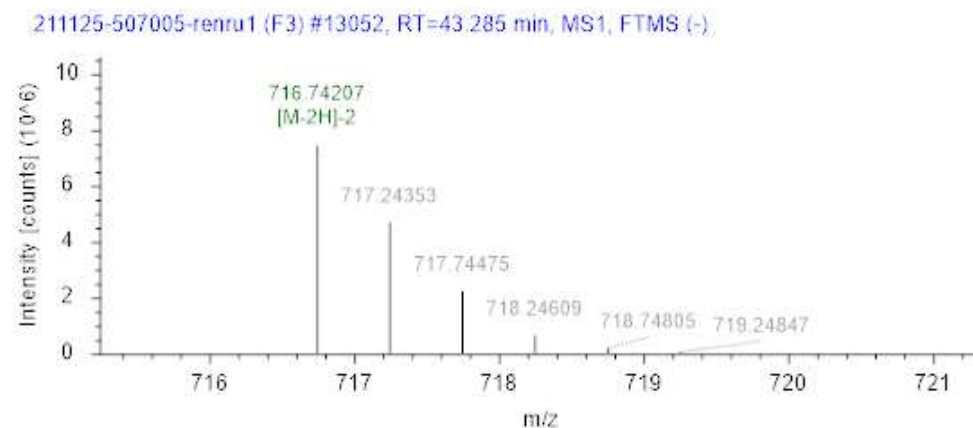

211125-507005-renru1 (F3) #13017, RT=43.201 min, MS2, FTMS (-), (HCD, DDA, 716.7418@30, -2)

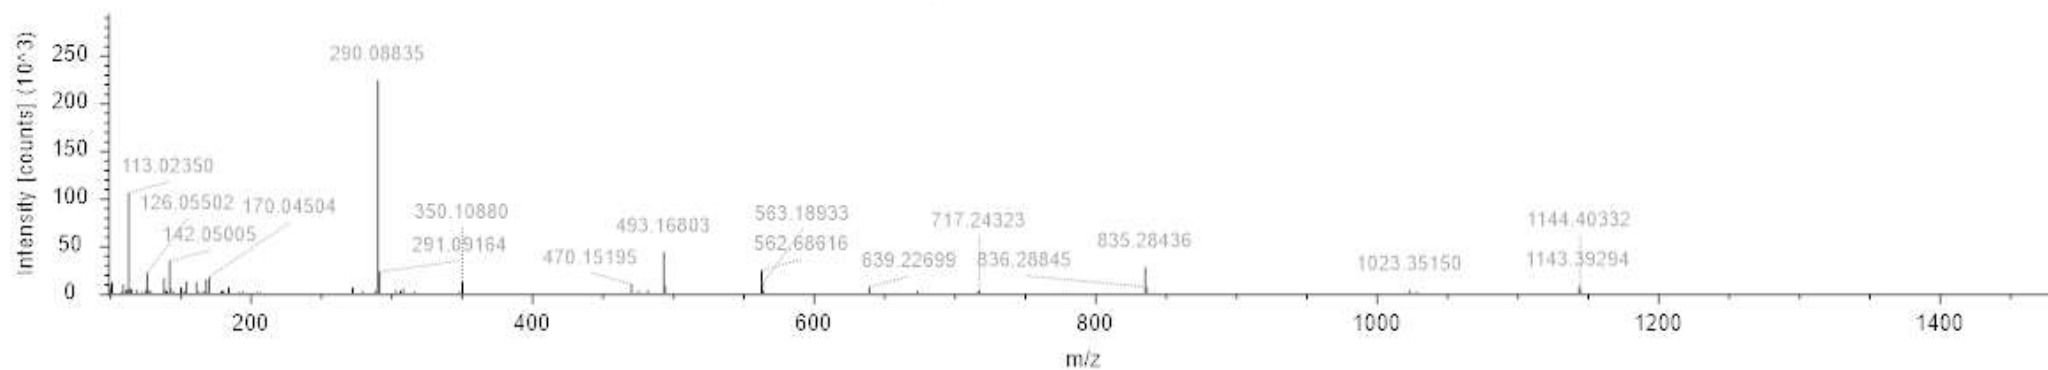



| Structure | Name | RT [min] | Formula | Calc. MW   | Areas  |
|-----------|------|----------|---------|------------|--------|
| n/a       |      | 44.08    | n/a     | 1509.53278 | 1.29e9 |

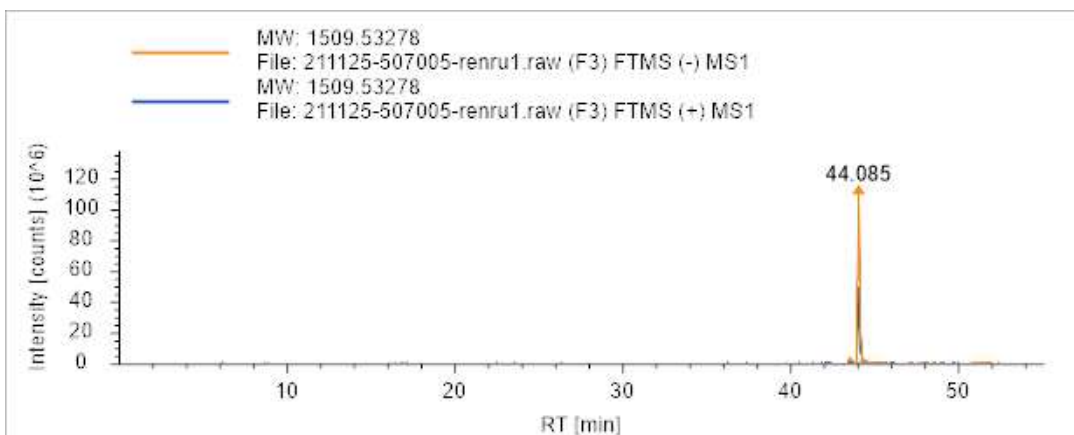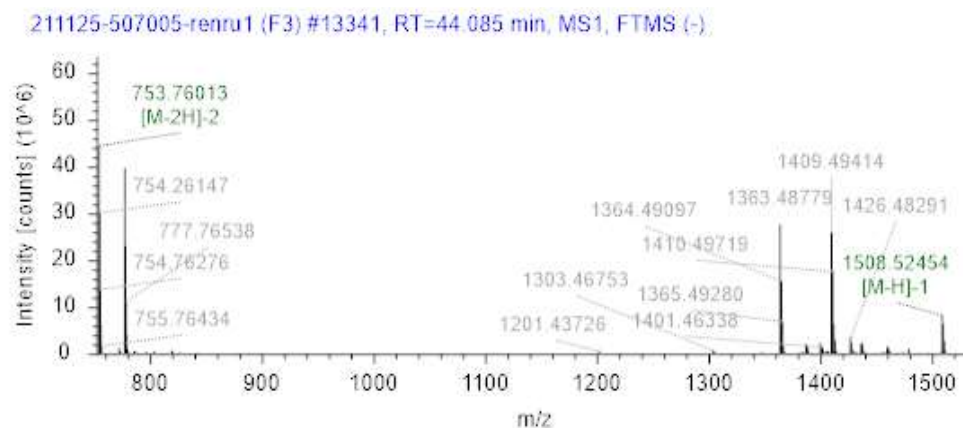

211125-507005-renru1 (F3) #13327, RT=44.049 min, MS2, FTMS (+), (HCD, DDA, 1510.5369@30, +1)

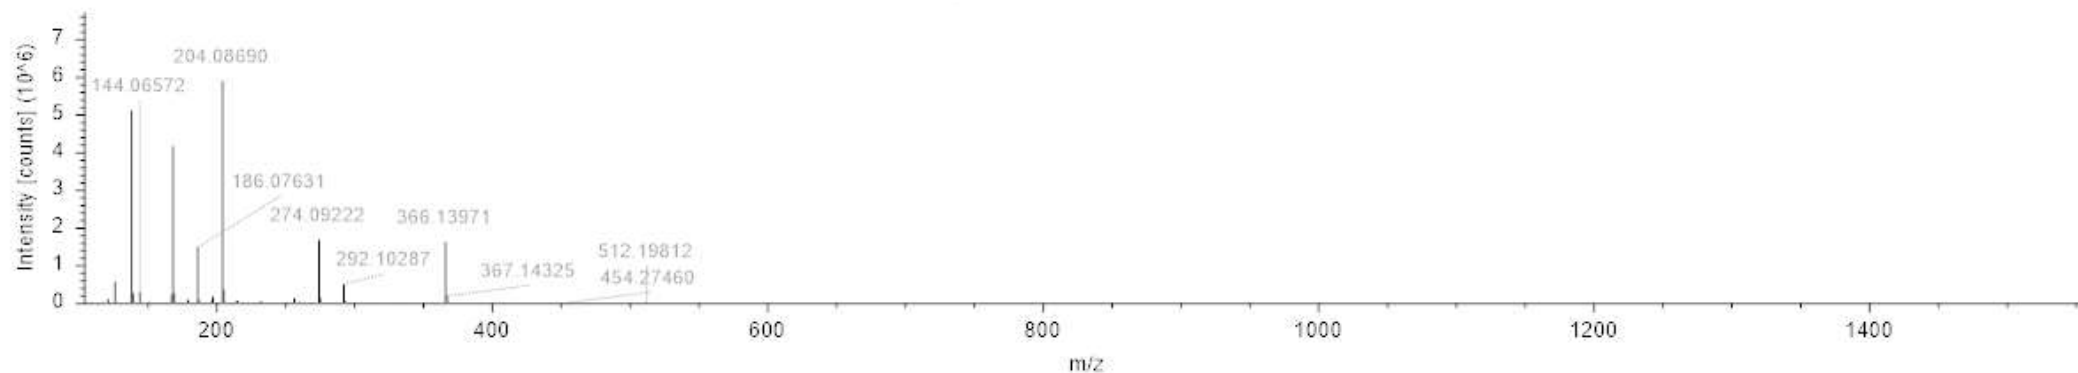



| Structure | Name | RT [min] | Formula | Calc. MW   | Areas  |
|-----------|------|----------|---------|------------|--------|
| n/a       |      | 43.57    | n/a     | 1509.53482 | 3.54e7 |

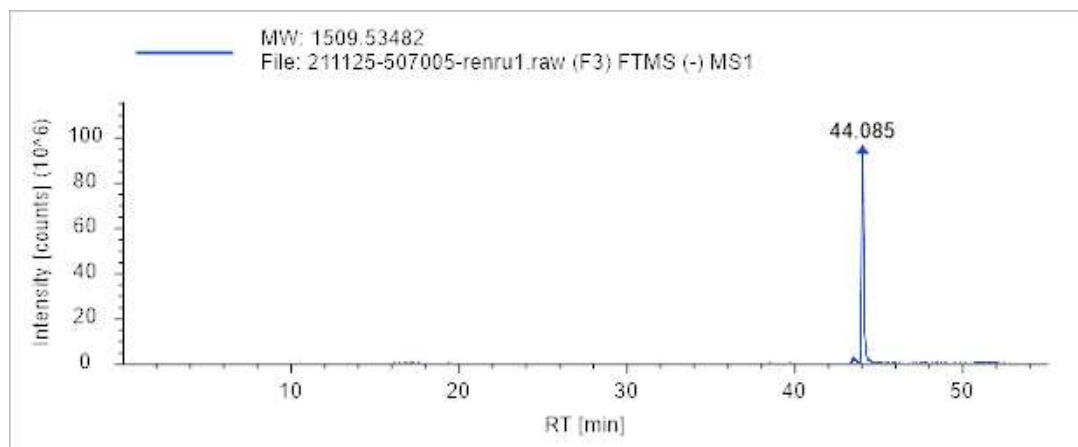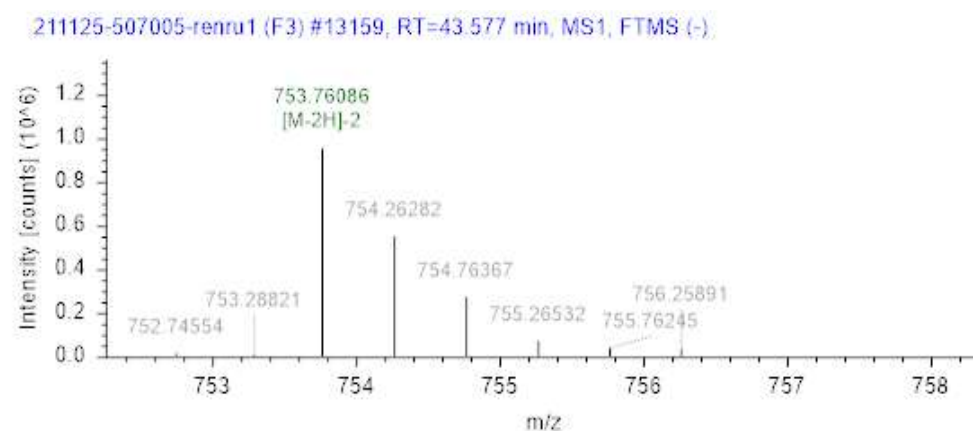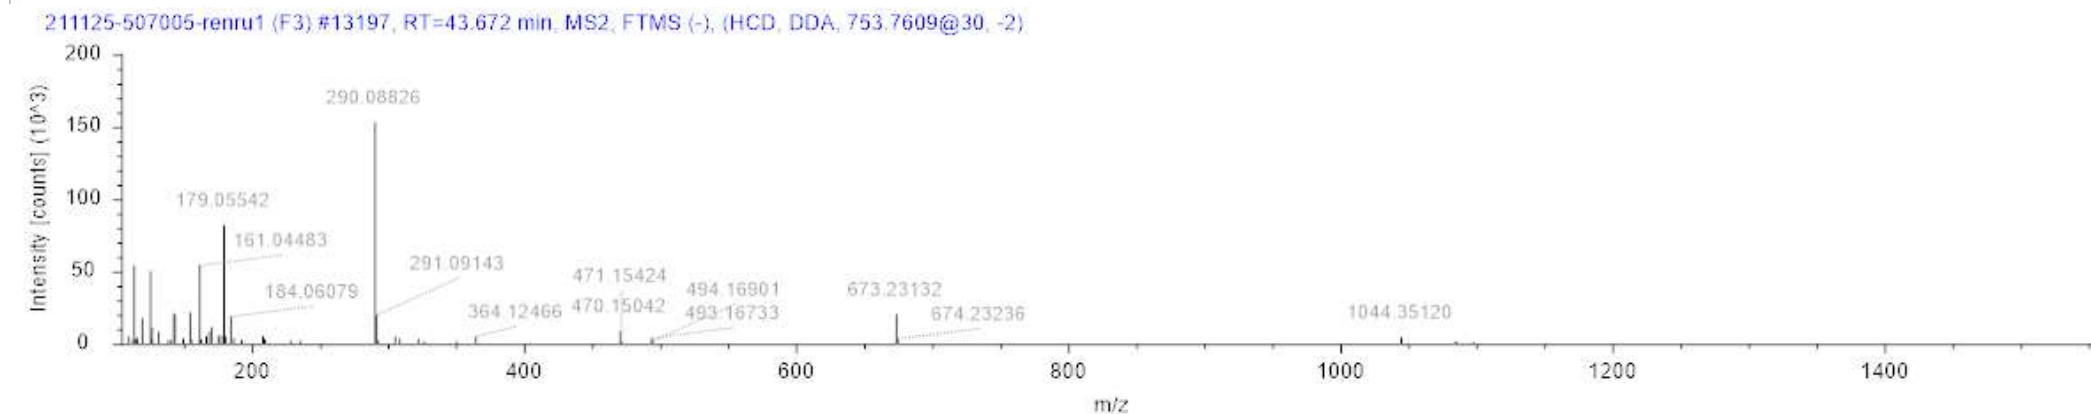



| Structure | Name | RT [min] | Formula | Calc. MW   | Areas  |
|-----------|------|----------|---------|------------|--------|
| n/a       |      | 44.35    | n/a     | 1654.57206 | 1.42e8 |

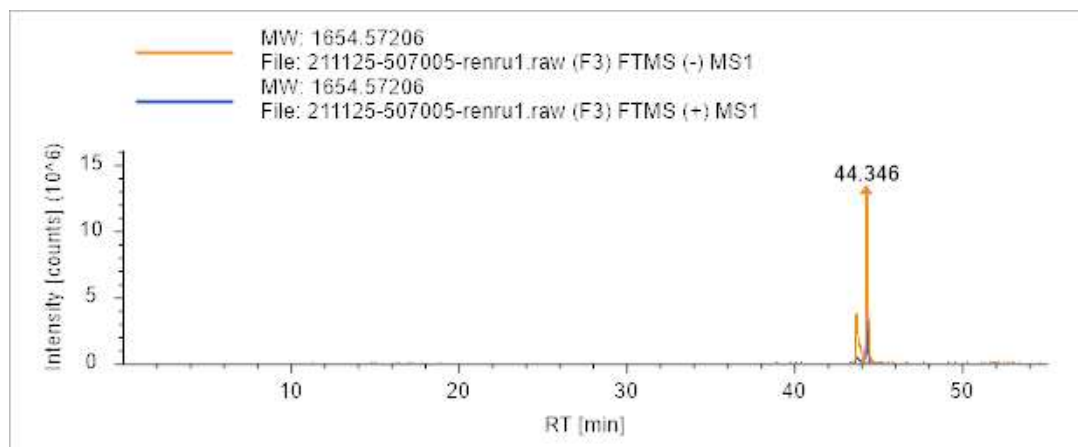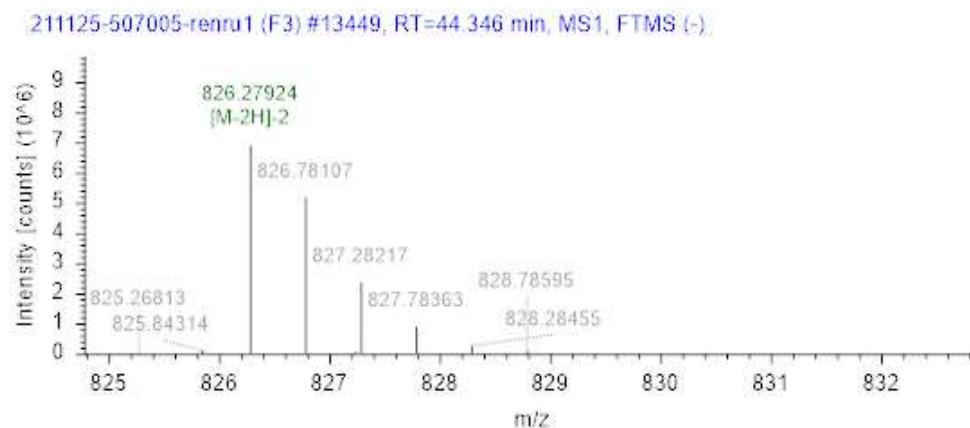

211125-507005-renru1 (F3) #13486, RT=44.439 min, MS2, FTMS (-), (HCD, DDA, 826.2795@30, -2)

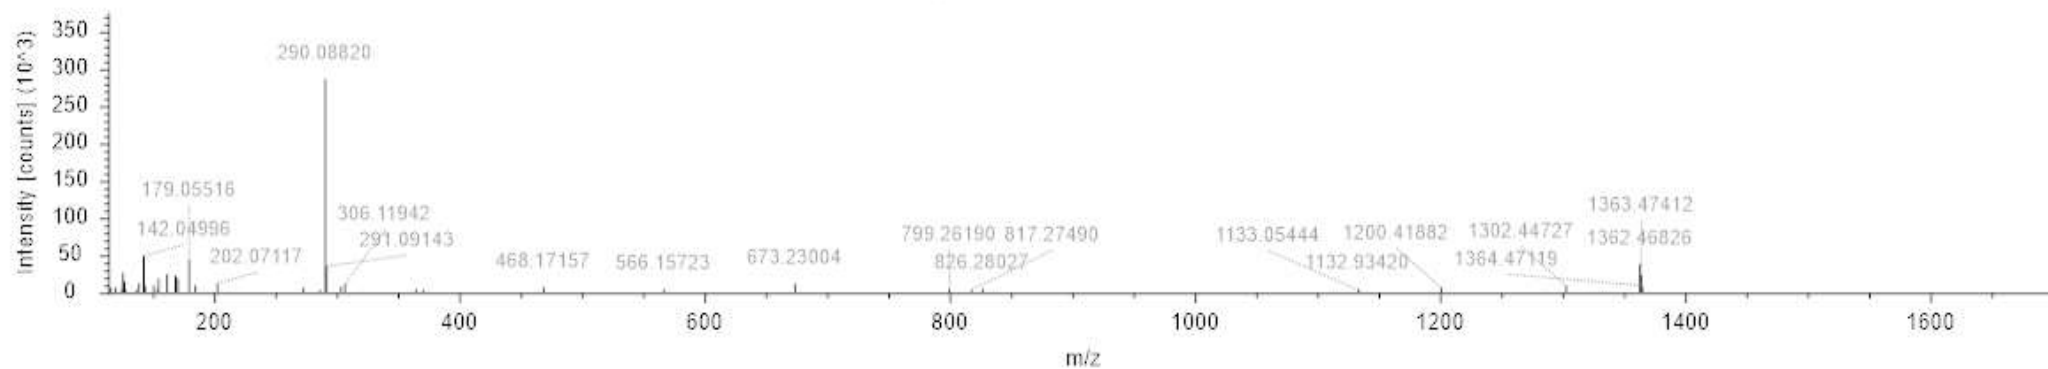



| Structure | Name | RT [min] | Formula | Calc. MW   | Areas  |
|-----------|------|----------|---------|------------|--------|
| n/a       |      | 43.75    | n/a     | 1654.57302 | 3.34e7 |

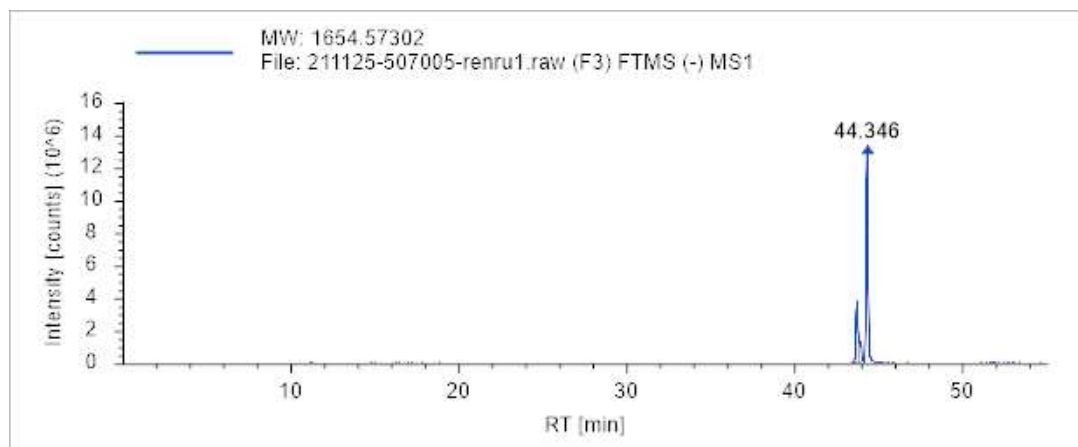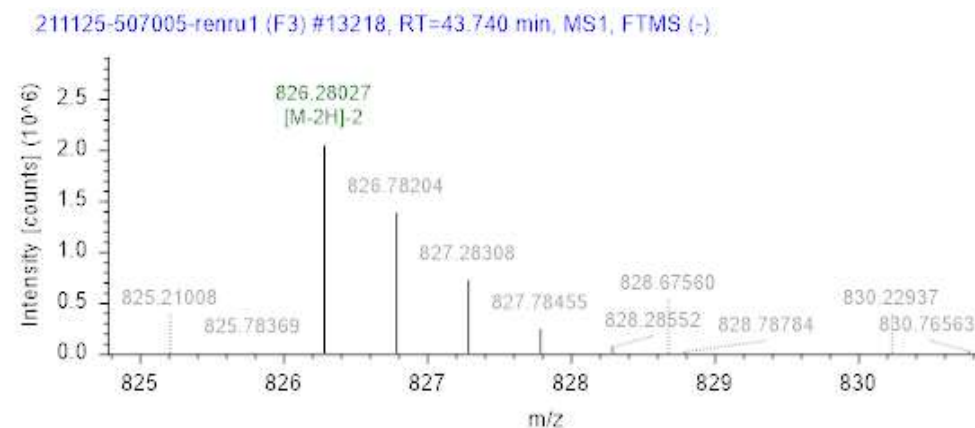

211125-507005-renru1 (F3) #13247, RT=43.838 min, MS2, FTMS (-), (HCD, DDA, 826.2805@30, -2)

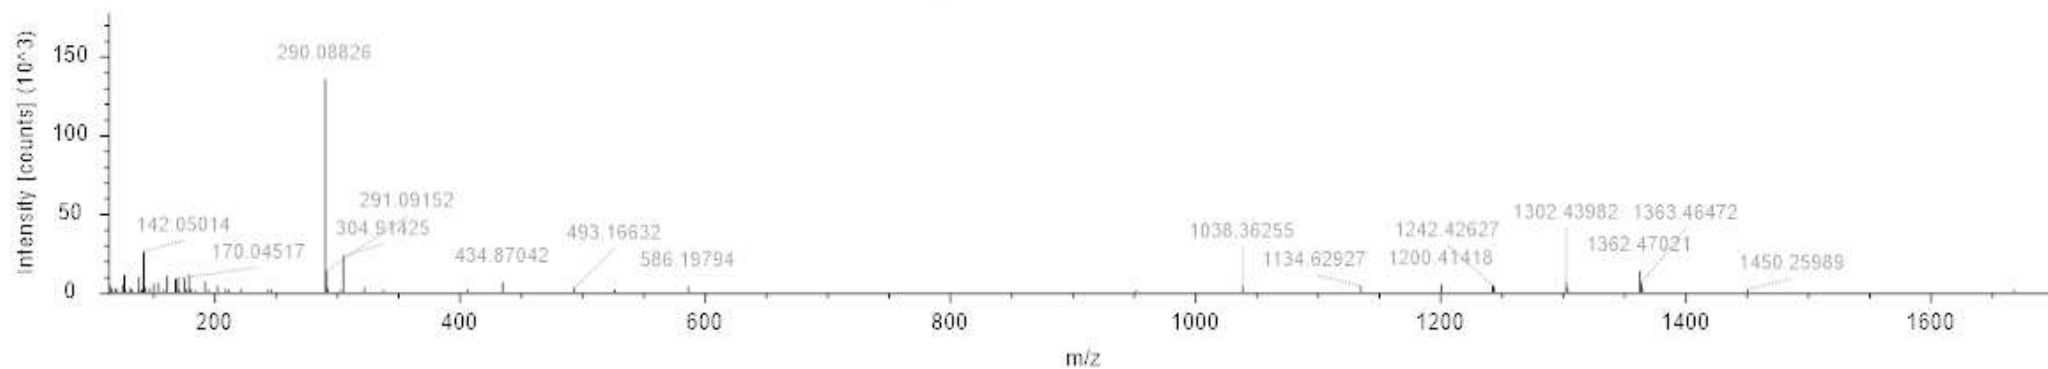



| Structure | Name | RT [min] | Formula | Calc. MW   | Areas  |
|-----------|------|----------|---------|------------|--------|
| n/a       |      | 44.58    | n/a     | 1728.61050 | 1.64e7 |

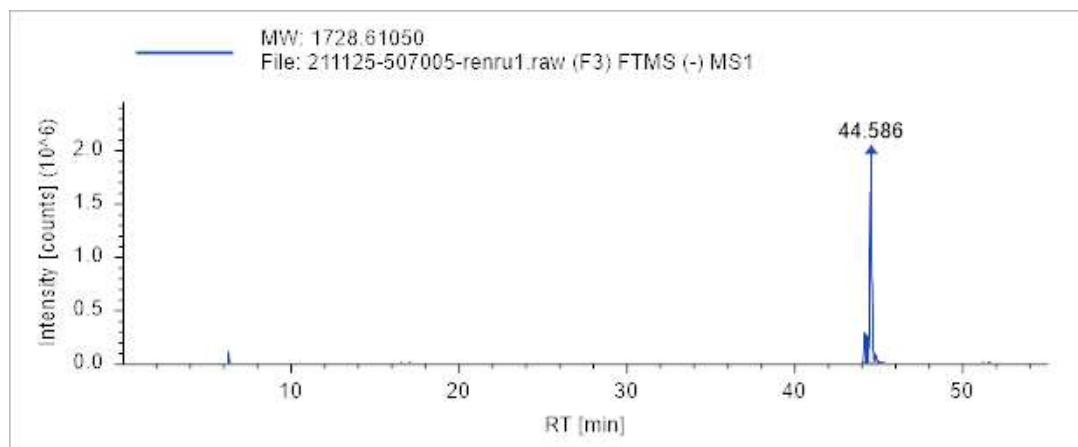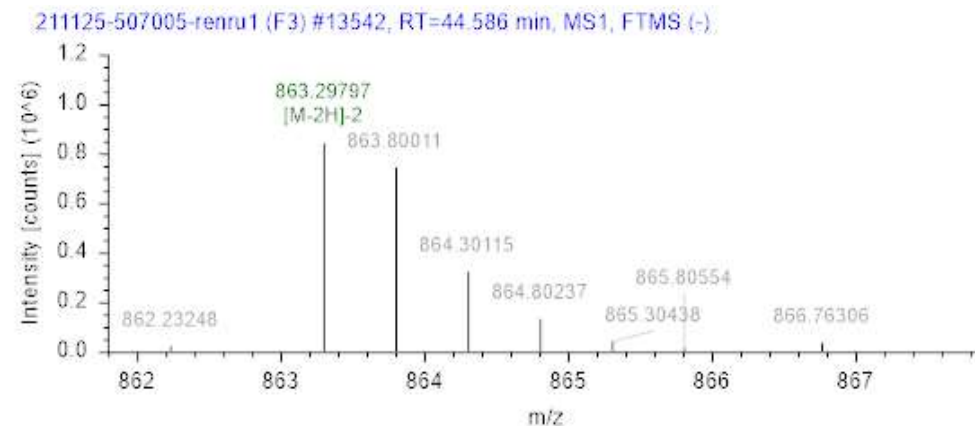

211125-507005-renru1 (F3) #13512, RT=44.503 min, MS2, FTMS (-), (HCD, DDA, 863.2968@30, -2)

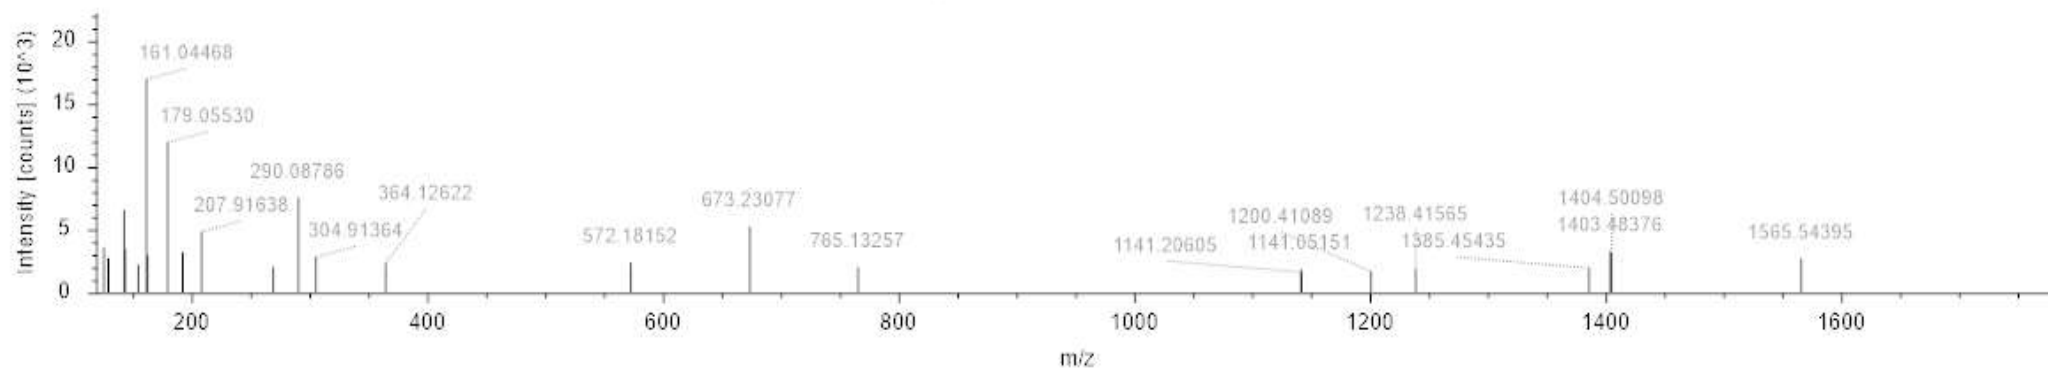





| Structure | Name | RT [min] | Formula | Calc. MW   | Areas  |
|-----------|------|----------|---------|------------|--------|
| n/a       |      | 45.27    | n/a     | 1874.66881 | 6.77e7 |

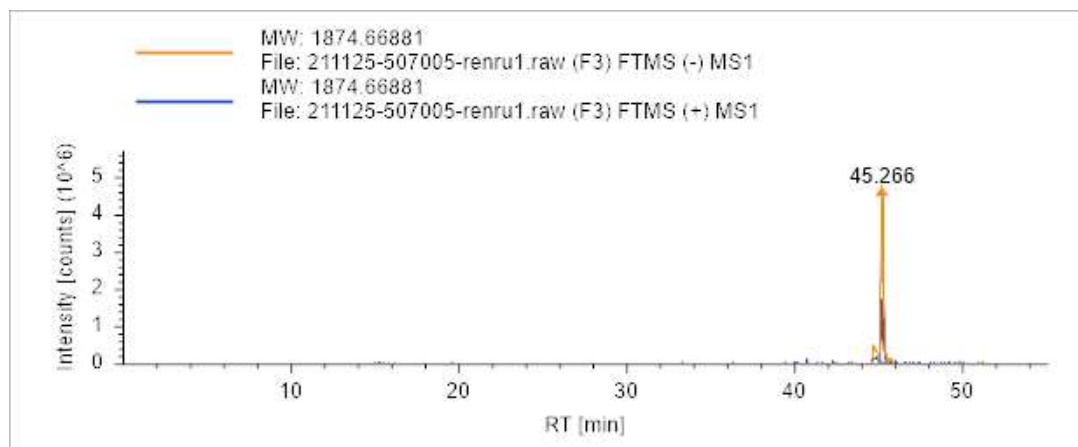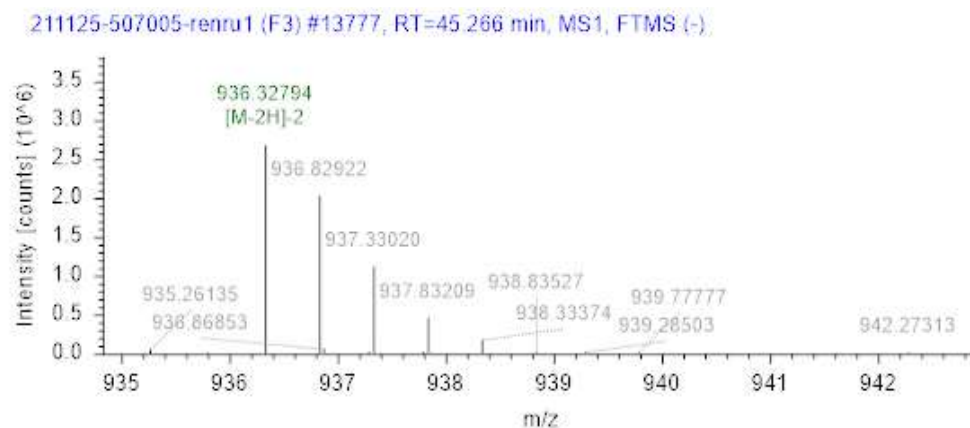

211125-507005-renru1 (F3) #13804, RT=45.334 min, MS2, FTMS (-), (HCD, DDA, 936.3269@30, -2)

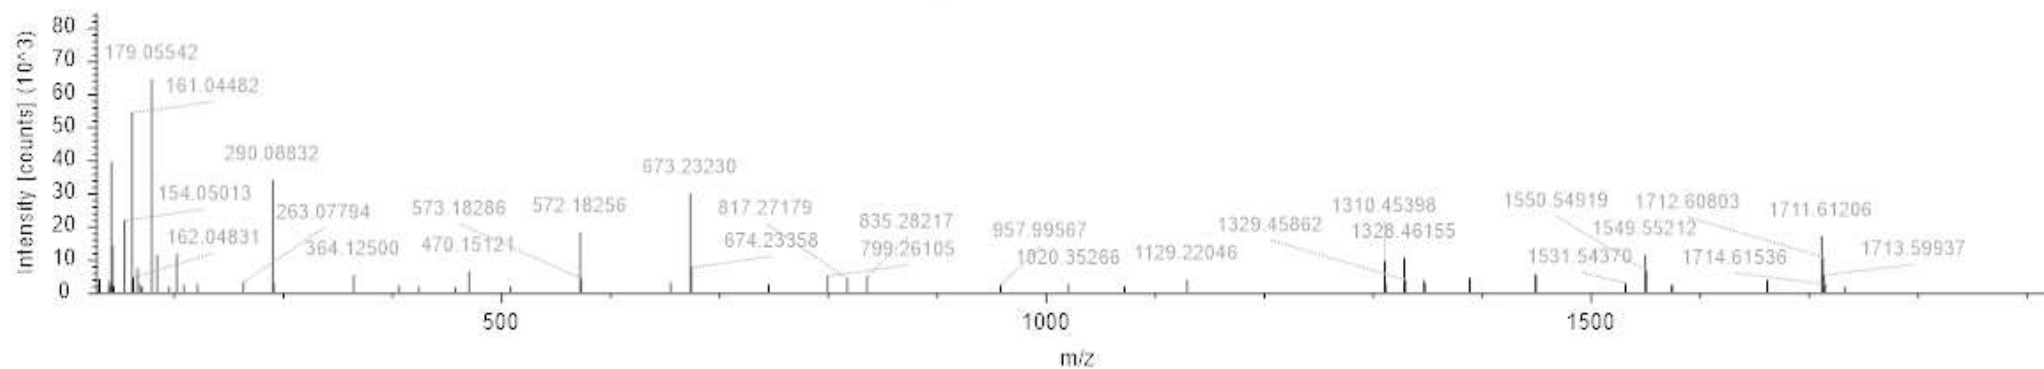



| Structure | Name | RT [min] | Formula | Calc. MW   | Areas  |
|-----------|------|----------|---------|------------|--------|
| n/a       |      | 44.91    | n/a     | 2019.70694 | 9.09e6 |

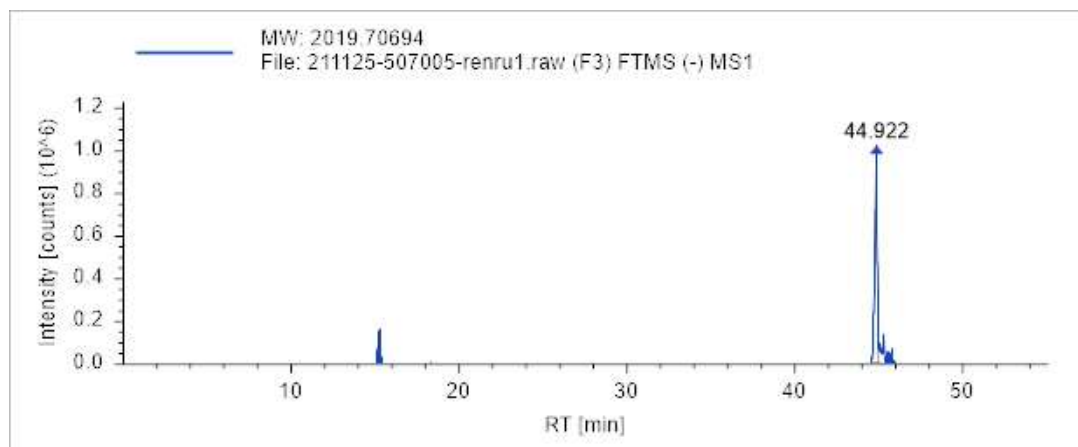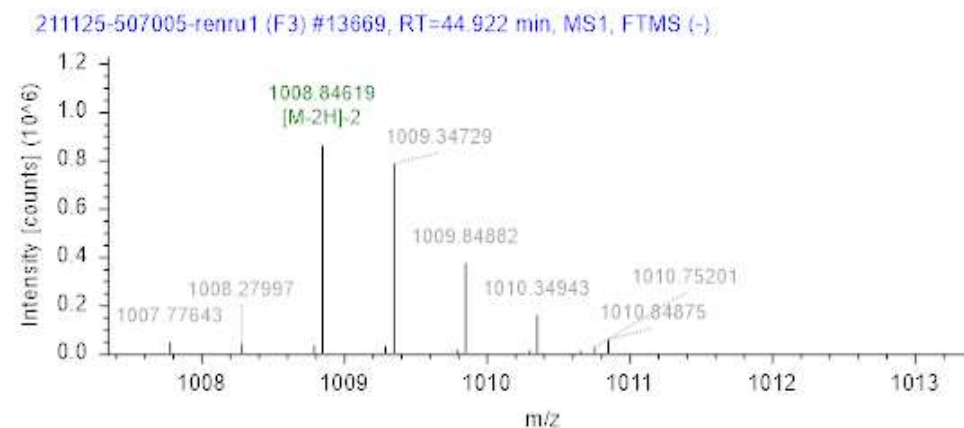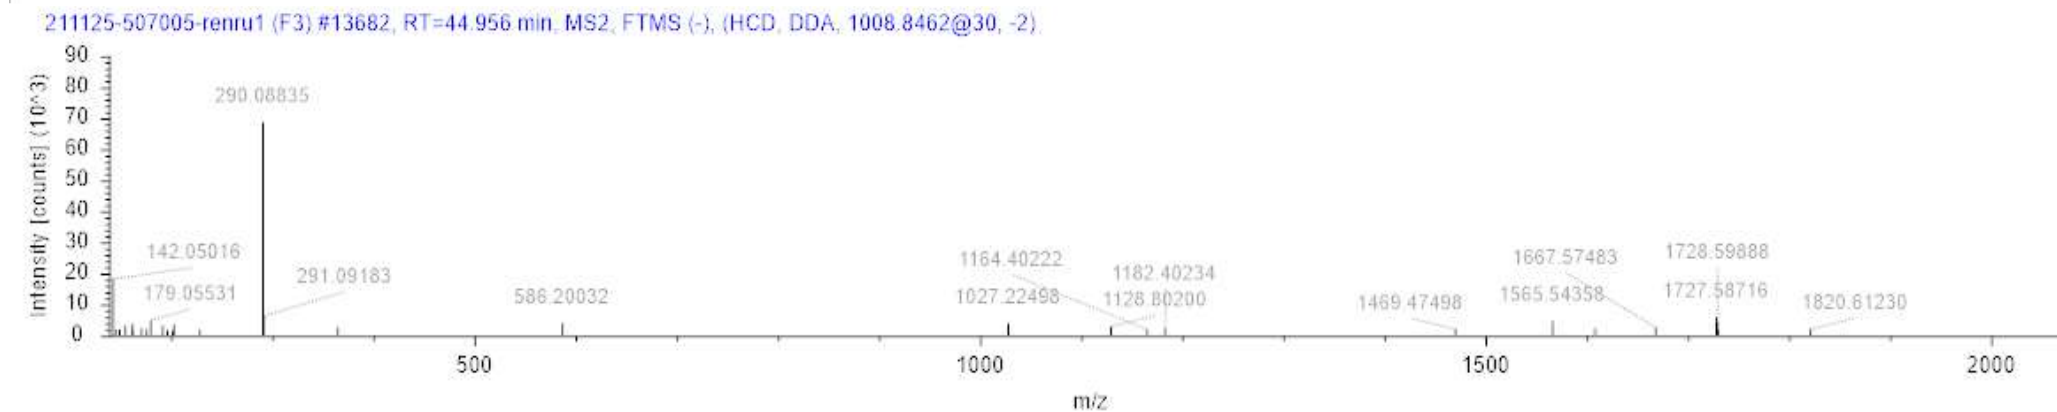



| Structure | Name | RT [min] | Formula | Calc. MW   | Areas  |
|-----------|------|----------|---------|------------|--------|
| n/a       |      | 46.10    | n/a     | 2020.72648 | 4.06e7 |

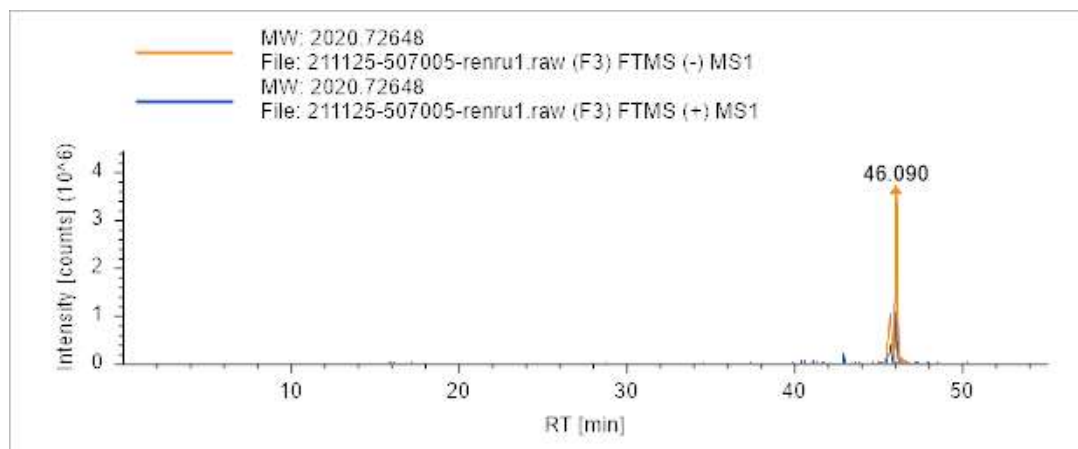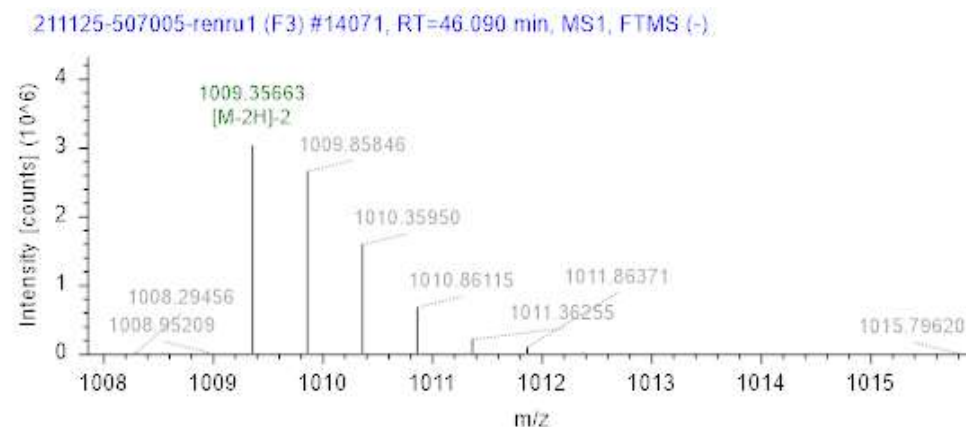

211125-507005-renru1 (F3) #14097, RT=46.162 min, MS2, FTMS (-), (HCD, DDA, 1009.3569@30, -2)

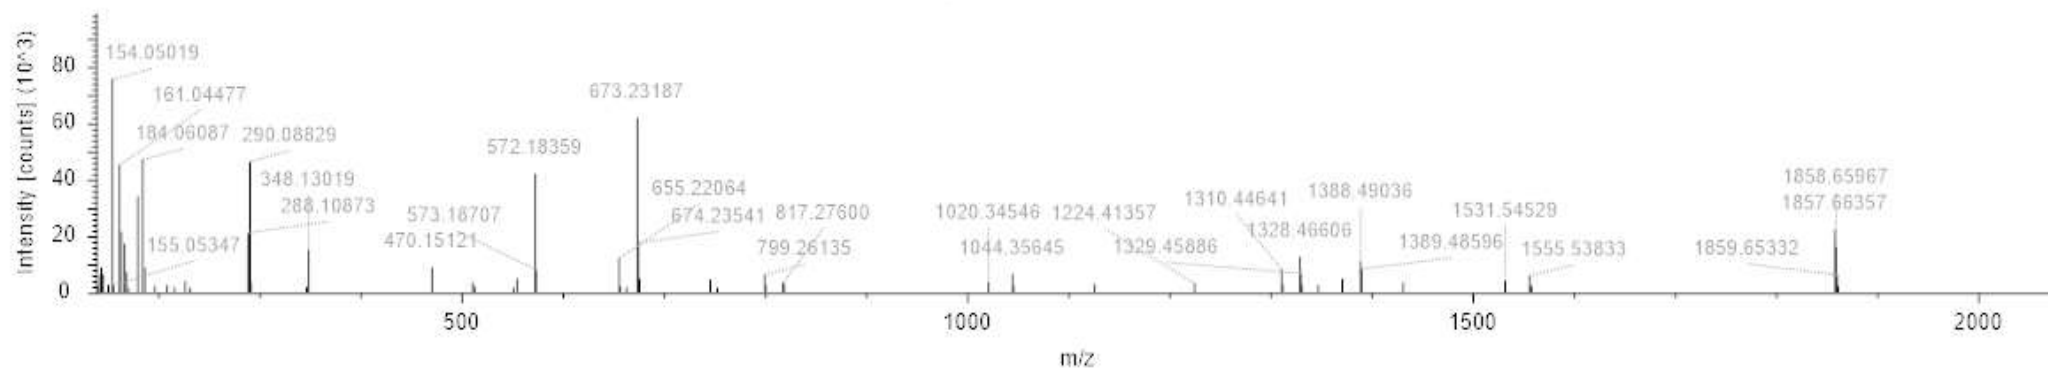



| Structure | Name | RT [min] | Formula | Calc. MW   | Areas  |
|-----------|------|----------|---------|------------|--------|
| n/a       |      | 45.65    | n/a     | 2093.74112 | 1.98e7 |

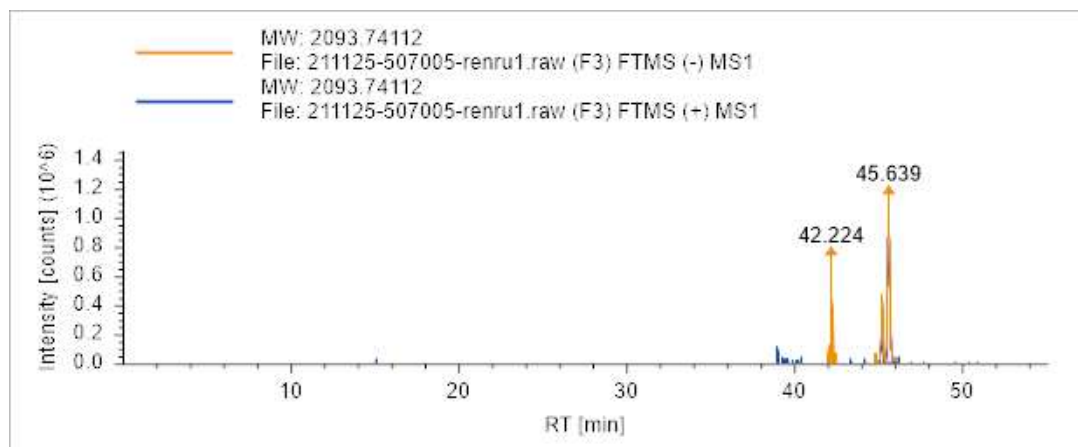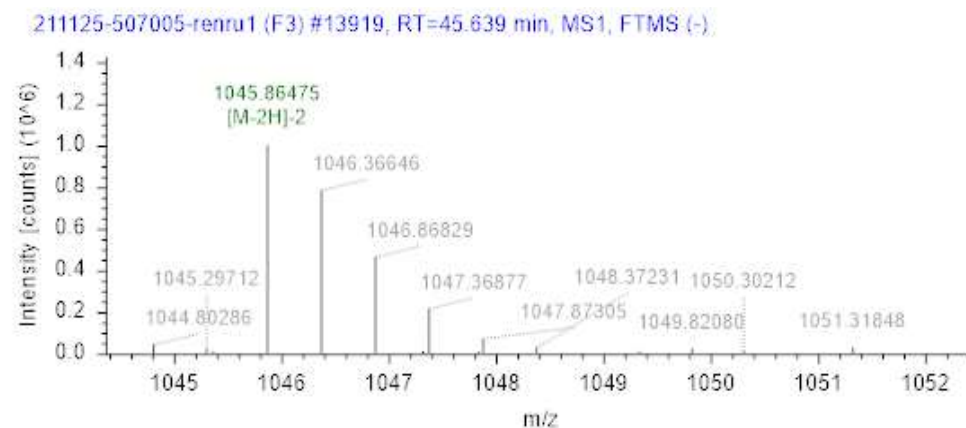

211125-507005-renru1 (F3) #13888, RT=45.552 min, MS2, FTMS (-), (HCD, DDA, 1045.8647@30, -2).

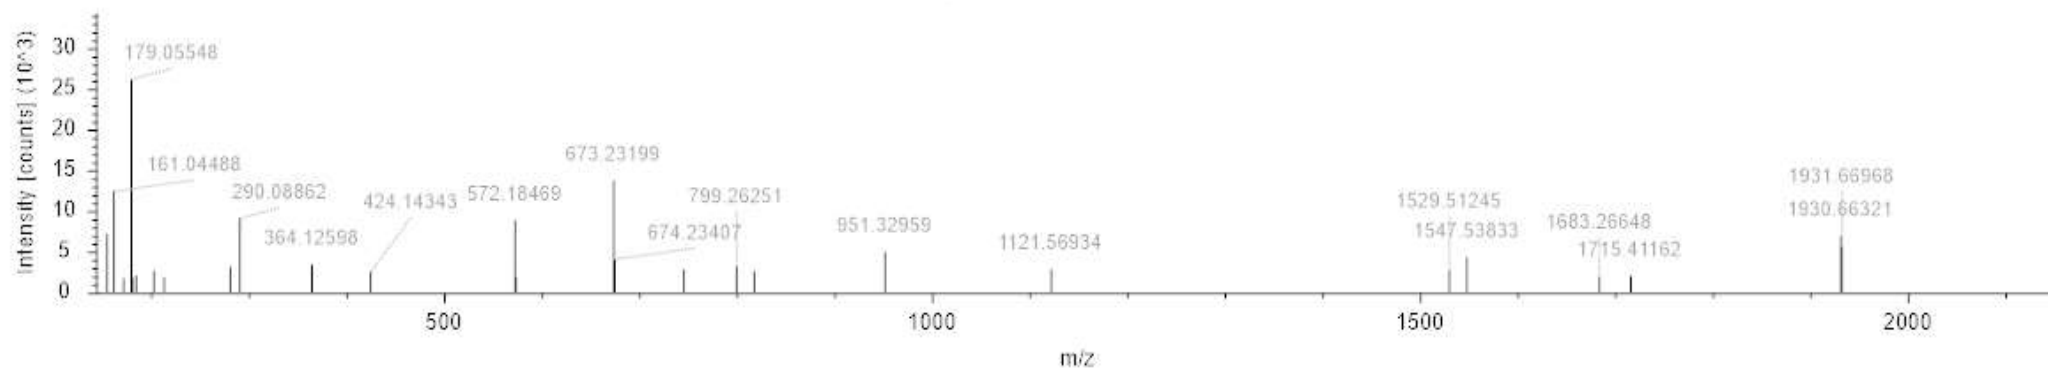



| Structure | Name | RT [min] | Formula | Calc. MW   | Areas  |
|-----------|------|----------|---------|------------|--------|
| n/a       |      | 45.34    | n/a     | 2165.76309 | 4.78e7 |

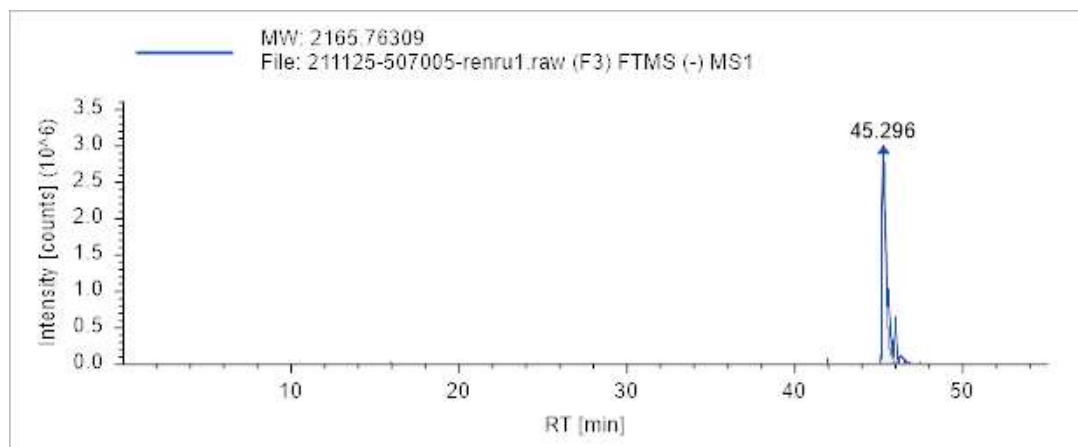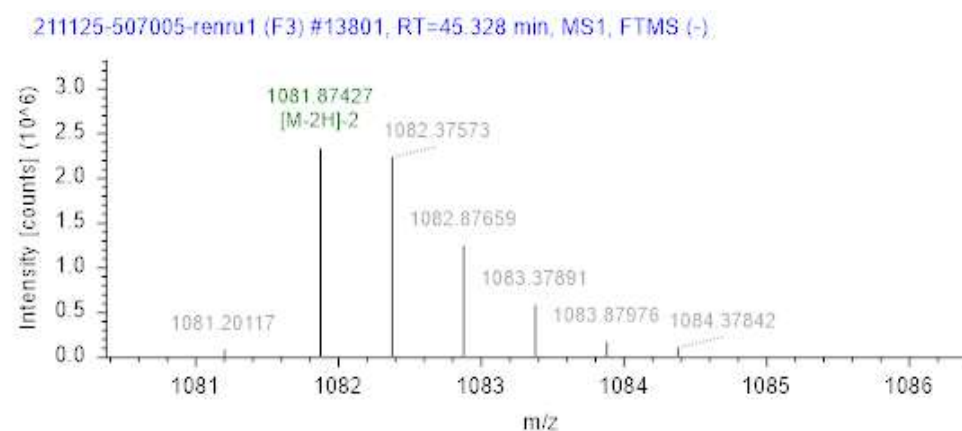

211125-507005-renru1 (F3) #13768, RT=45.241 min, MS2, FTMS (-), (HCD, DDA, 1081.8751@30, -2)

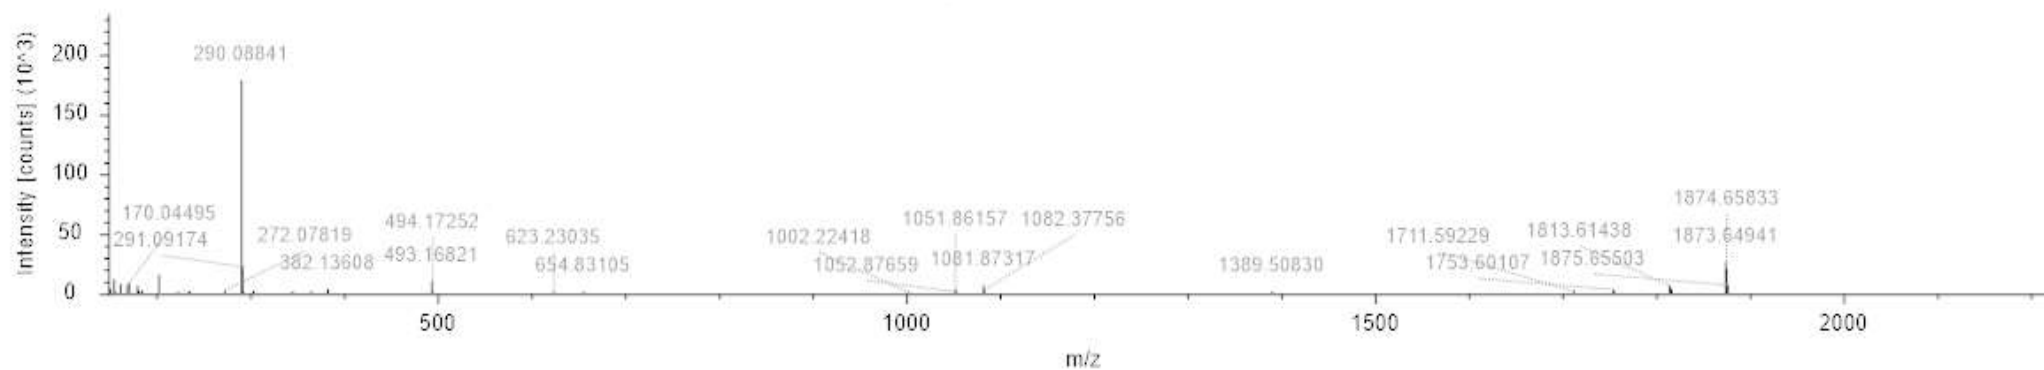



| Structure | Name | RT [min] | Formula | Calc. MW   | Areas  |
|-----------|------|----------|---------|------------|--------|
| n/a       |      | 46.32    | n/a     | 2239.79769 | 5.06e7 |

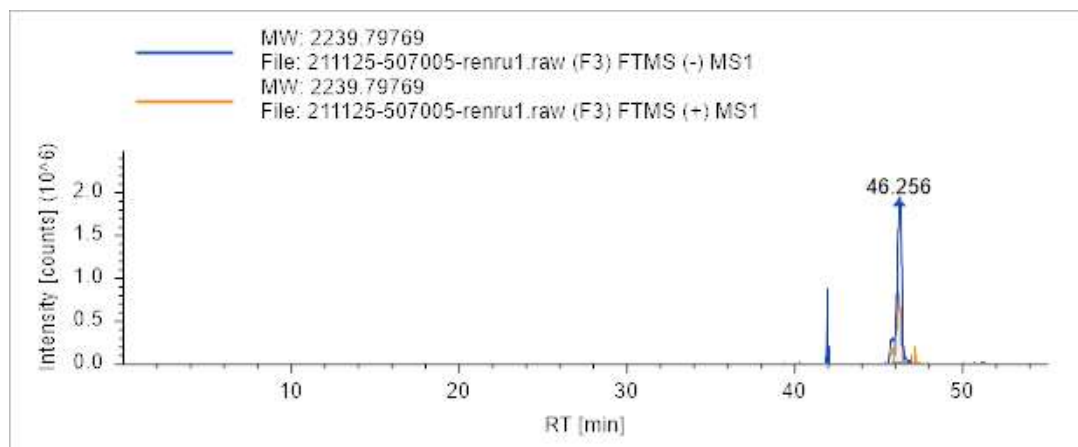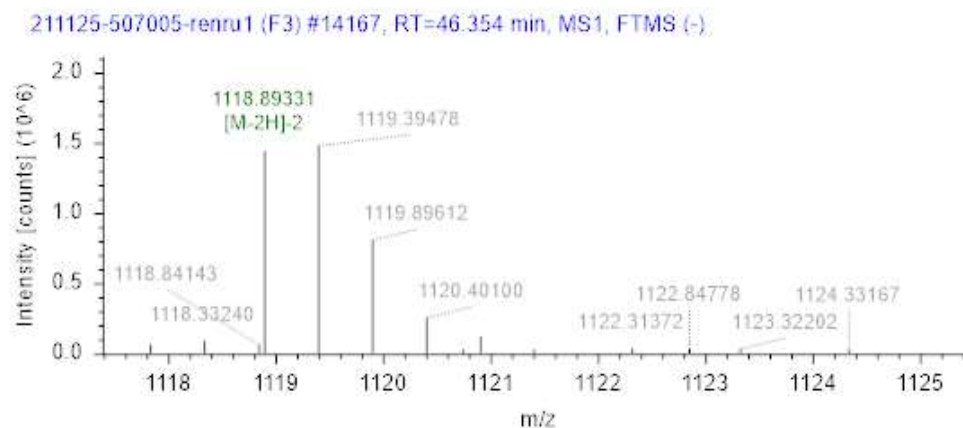

211125-507005-renru1 (F3) #14181, RT=46.390 min, MS2, FTMS (-), (HCD, DDA, 1119.3948@30, -2)

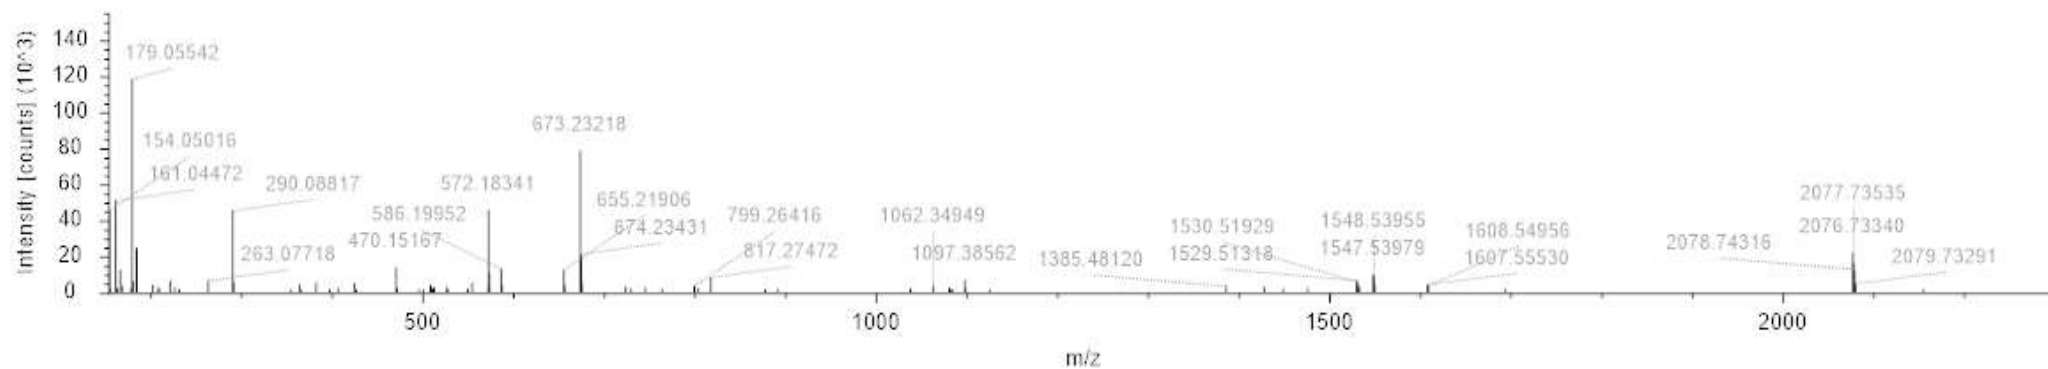



| Structure | Name | RT [min] | Formula | Calc. MW   | Areas  |
|-----------|------|----------|---------|------------|--------|
| n/a       |      | 46.34    | n/a     | 2240.80313 | 3.09e7 |

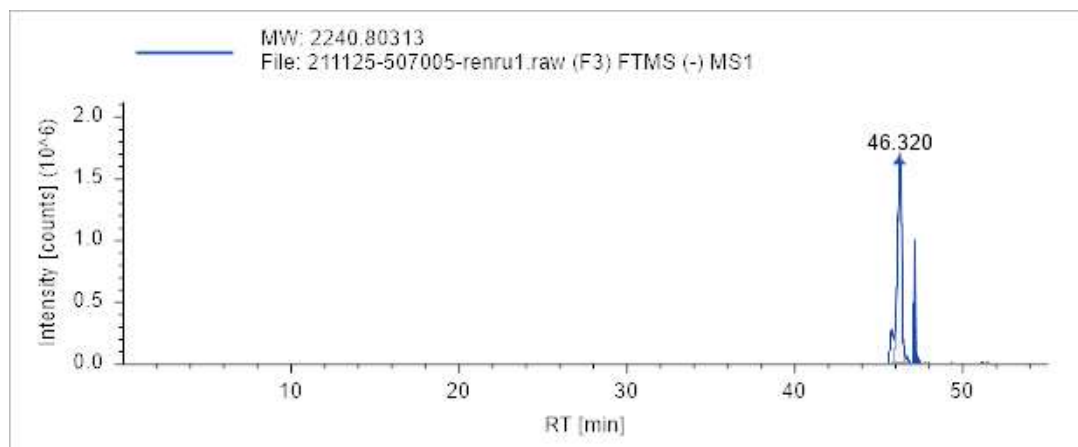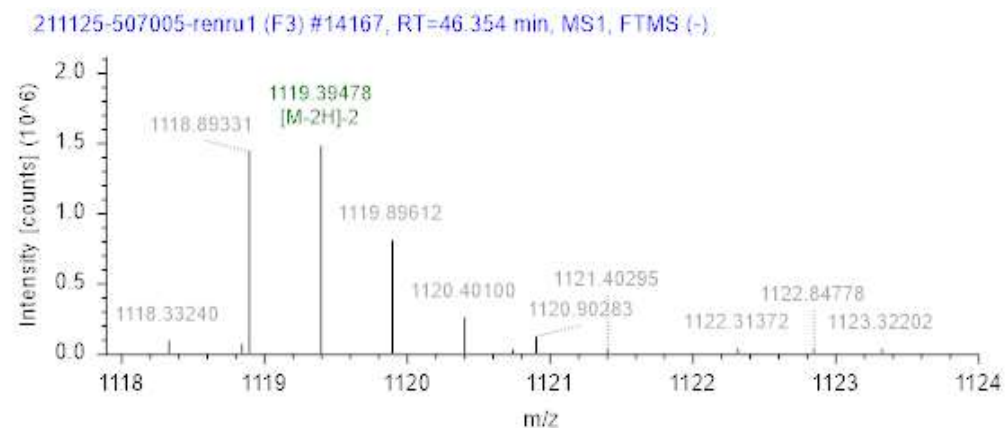

211125-507005-renru1 (F3) #14181, RT=46.390 min, MS2, FTMS (-), (HCD, DDA, 1119.3948@30, -2)

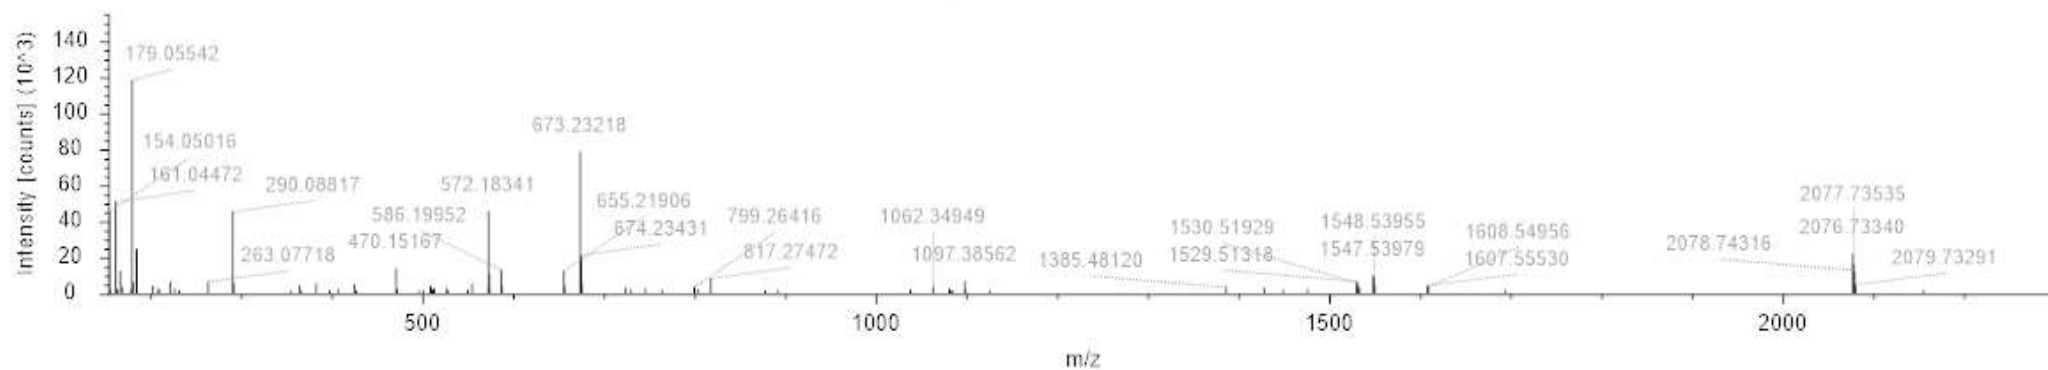



| Structure | Name | RT [min] | Formula | Calc. MW   | Areas  |
|-----------|------|----------|---------|------------|--------|
| n/a       |      | 47.18    | n/a     | 2241.82583 | 4.63e7 |

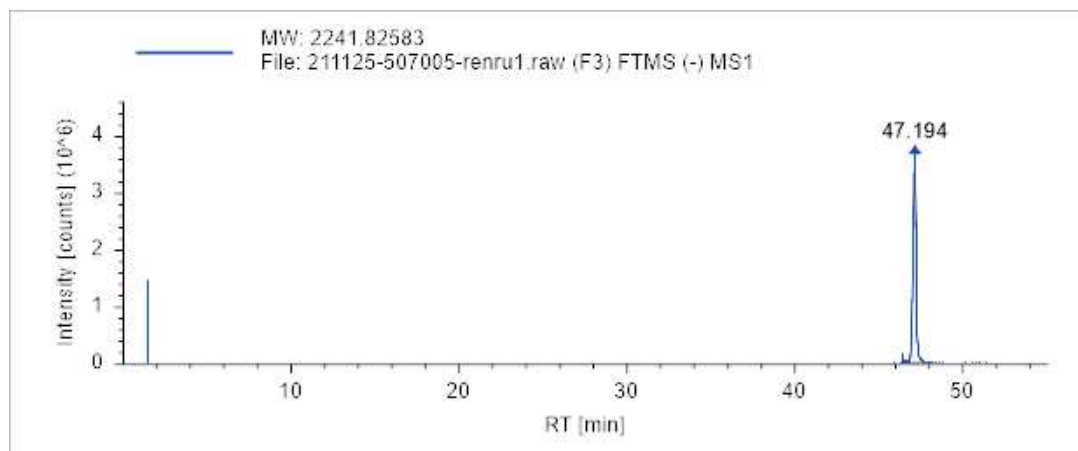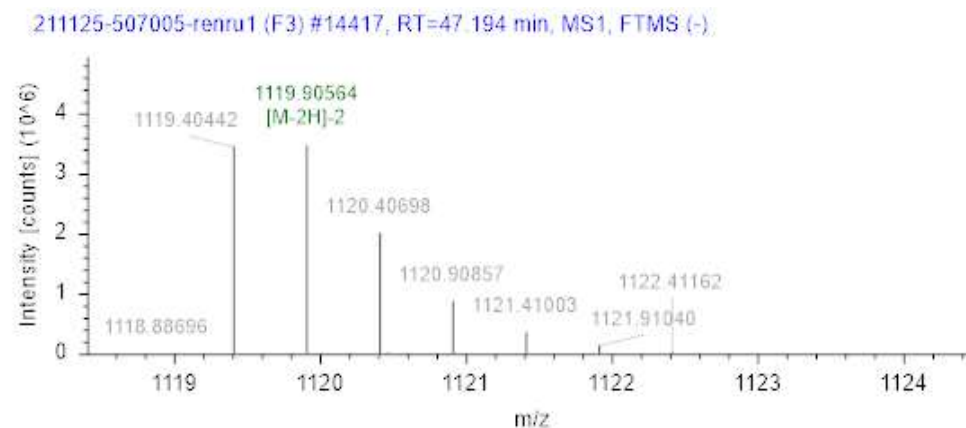

211125-507005-renru1 (F3) #14429, RT=47.231 min, MS2, FTMS (-), (HCD, DDA, 1119.9056@30, -2)

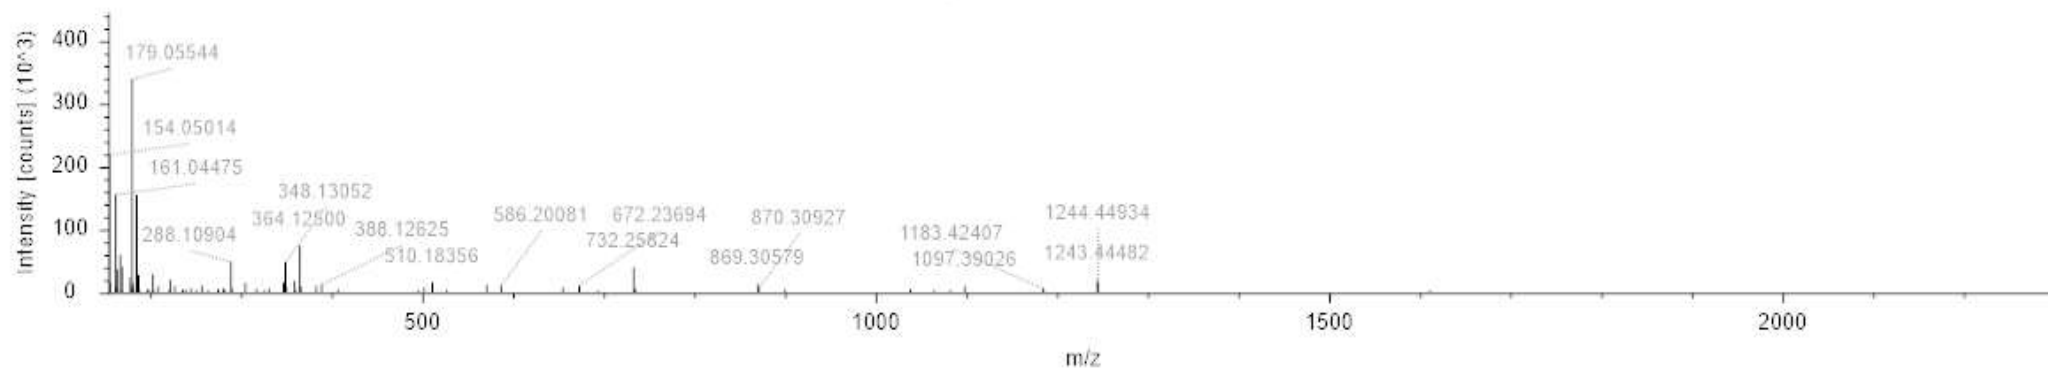

Supplement: mmc2.pdf [file mmc2.pdf]
